# Supplementary material for: Selenium analogues of rintodestrant (G1T48) as potent estrogen receptor modulators and downregulators
Source: Royal Society of Chemistry journal article supplement (doi:10.1039/d3nj01739g), 2023-01-01

**Supporting information**

**Selenium Analogues of Rintodestrant (G1T48) as Potent Estrogen Receptor Modulators and Downregulators**

Edgars Paegle, Pavels Dimitrijevs, and Pavel Arsenyan\*

$^1\text{H}$  NMR (400 MHz,  $\text{CDCl}_3$ ):

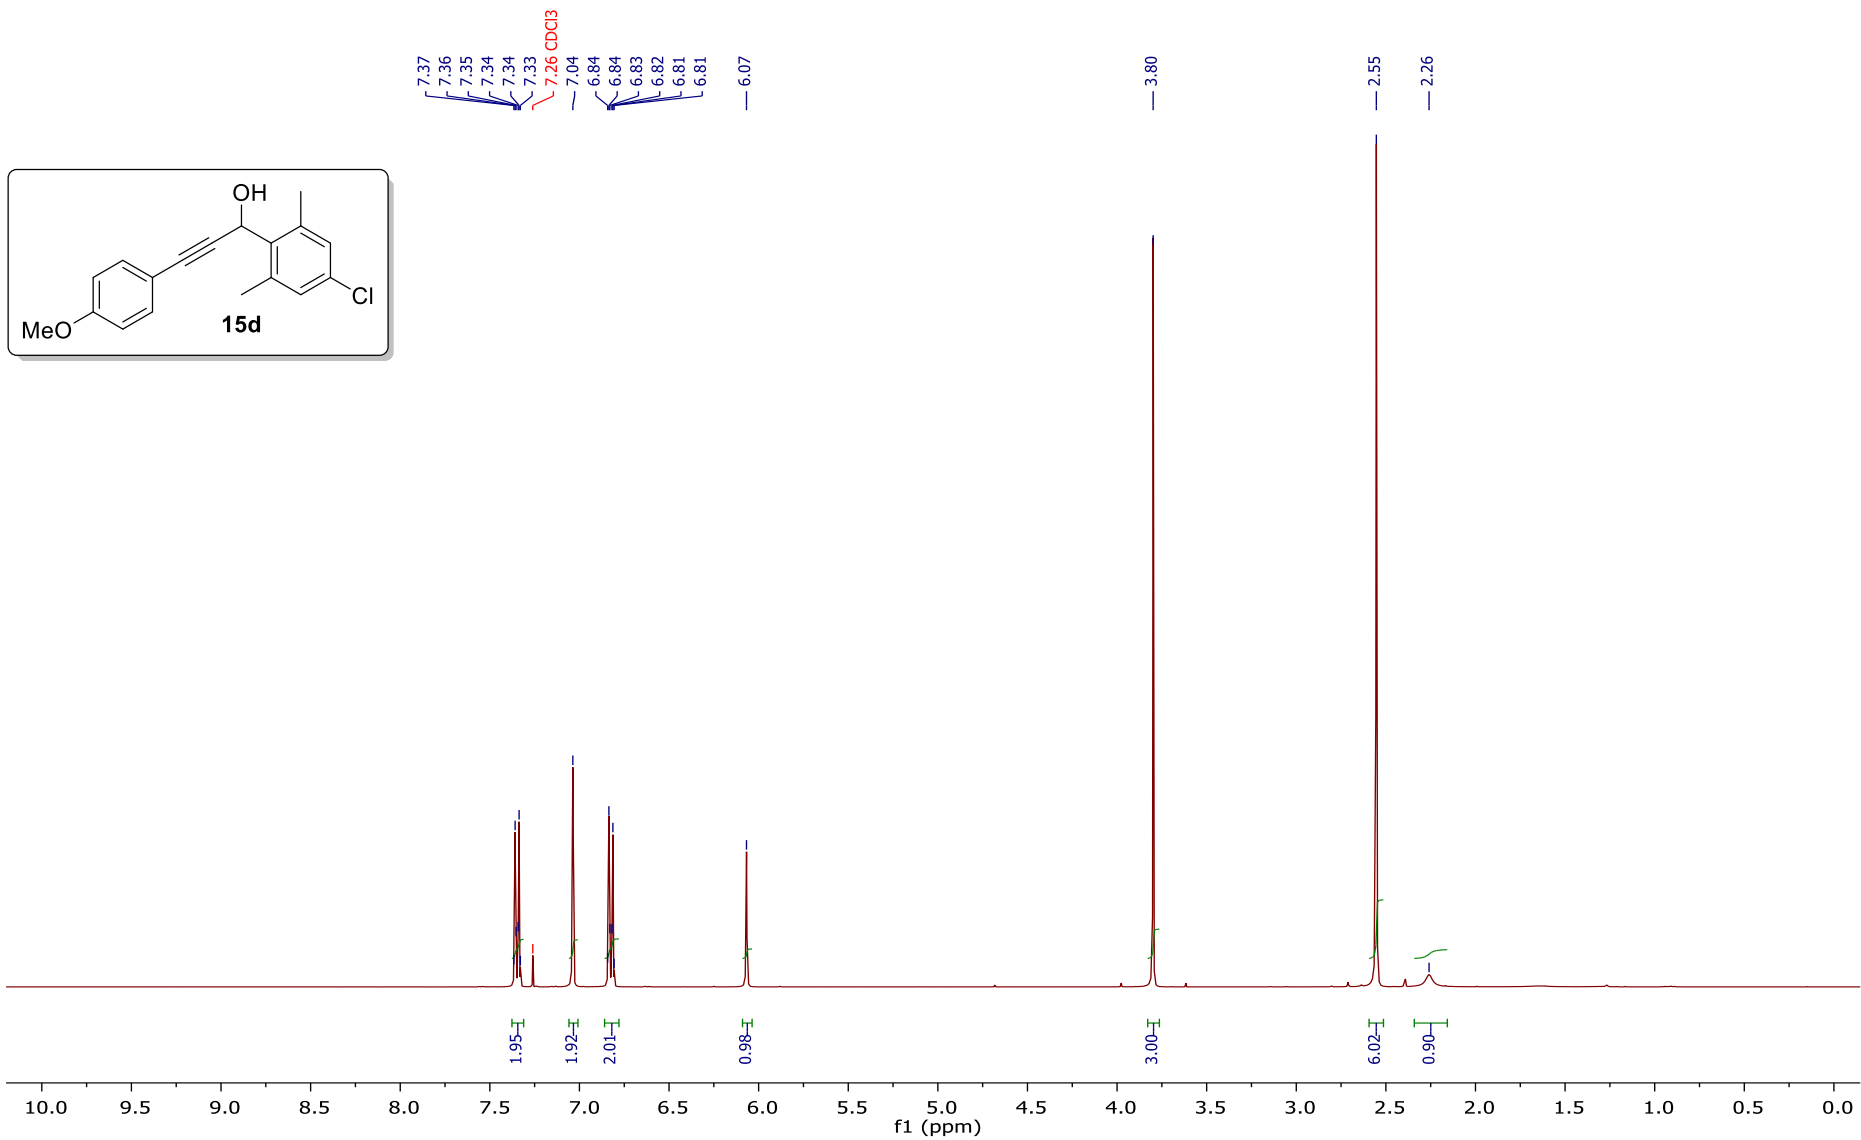

$^{13}\text{C}$  NMR (100.6 MHz,  $\text{CDCl}_3$ ):

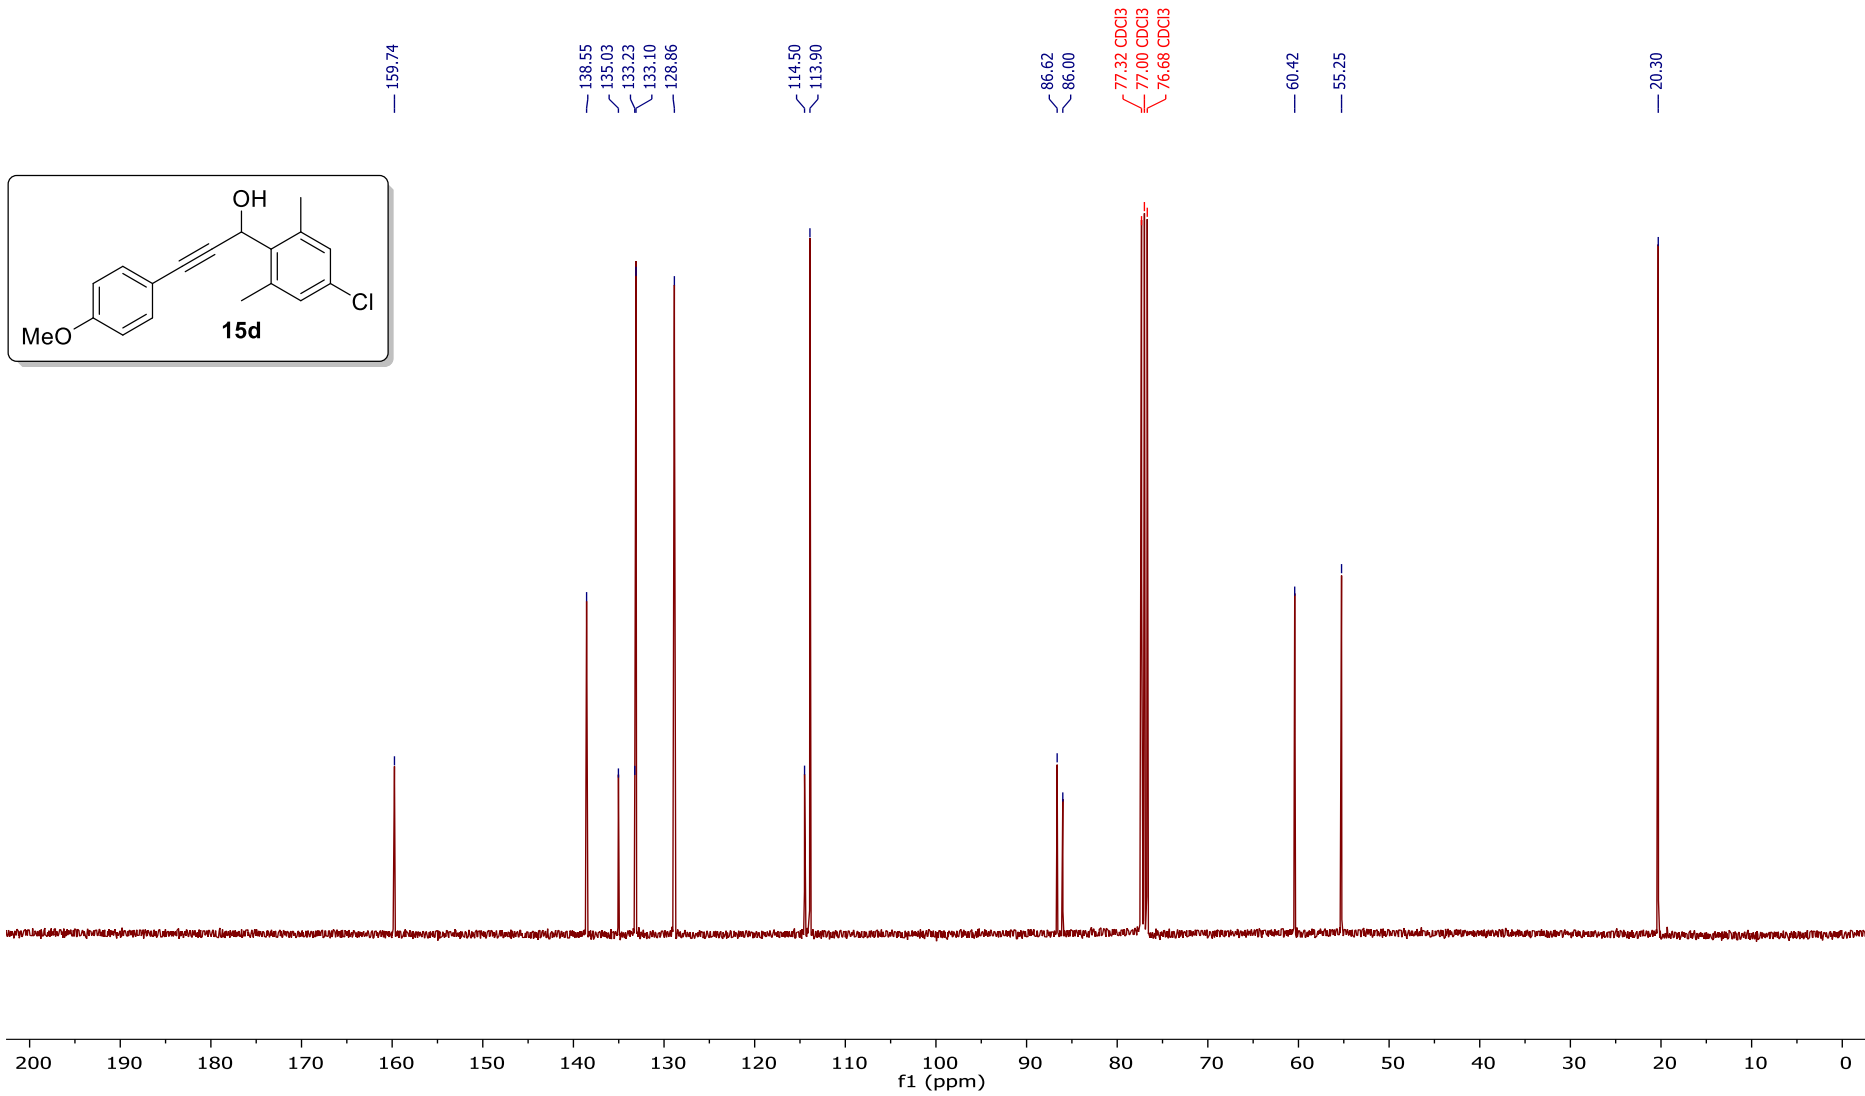

$^1\text{H}$  NMR (400 MHz,  $\text{CDCl}_3$ ):

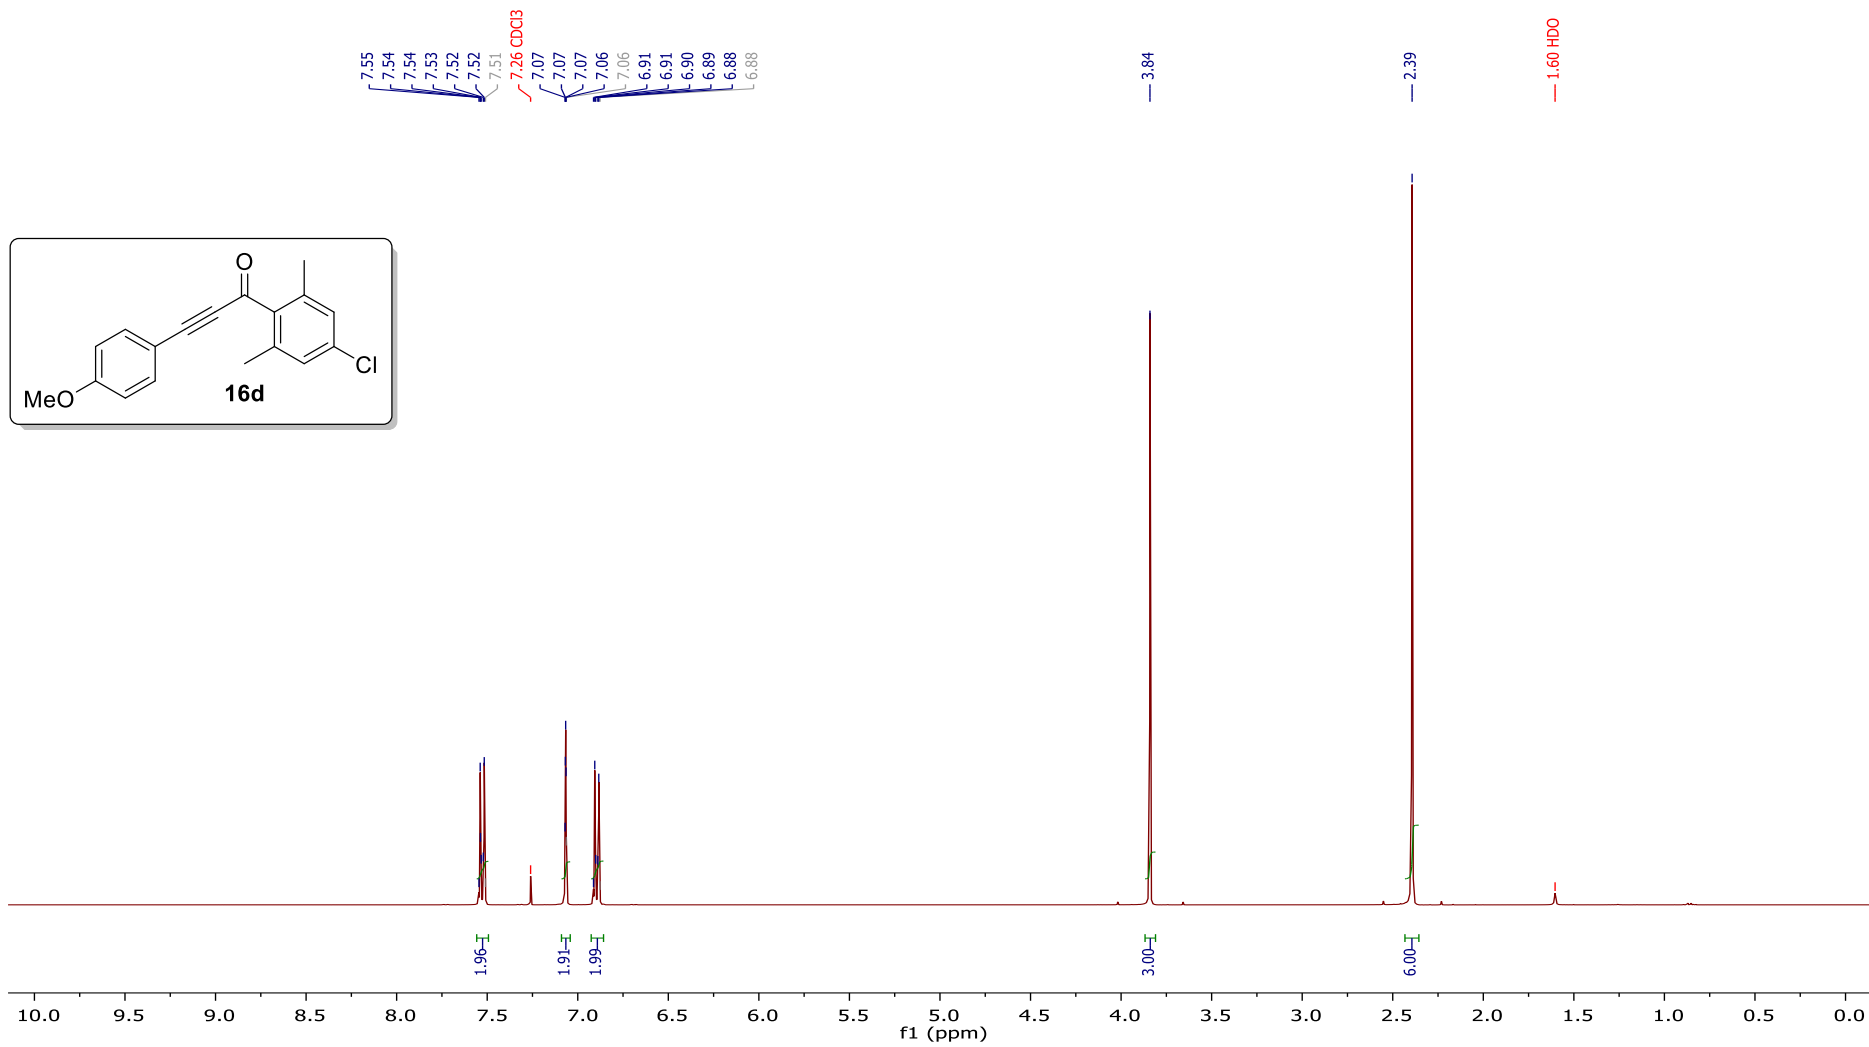

$^{13}\text{C}$  NMR (100.6 MHz,  $\text{CDCl}_3$ ):

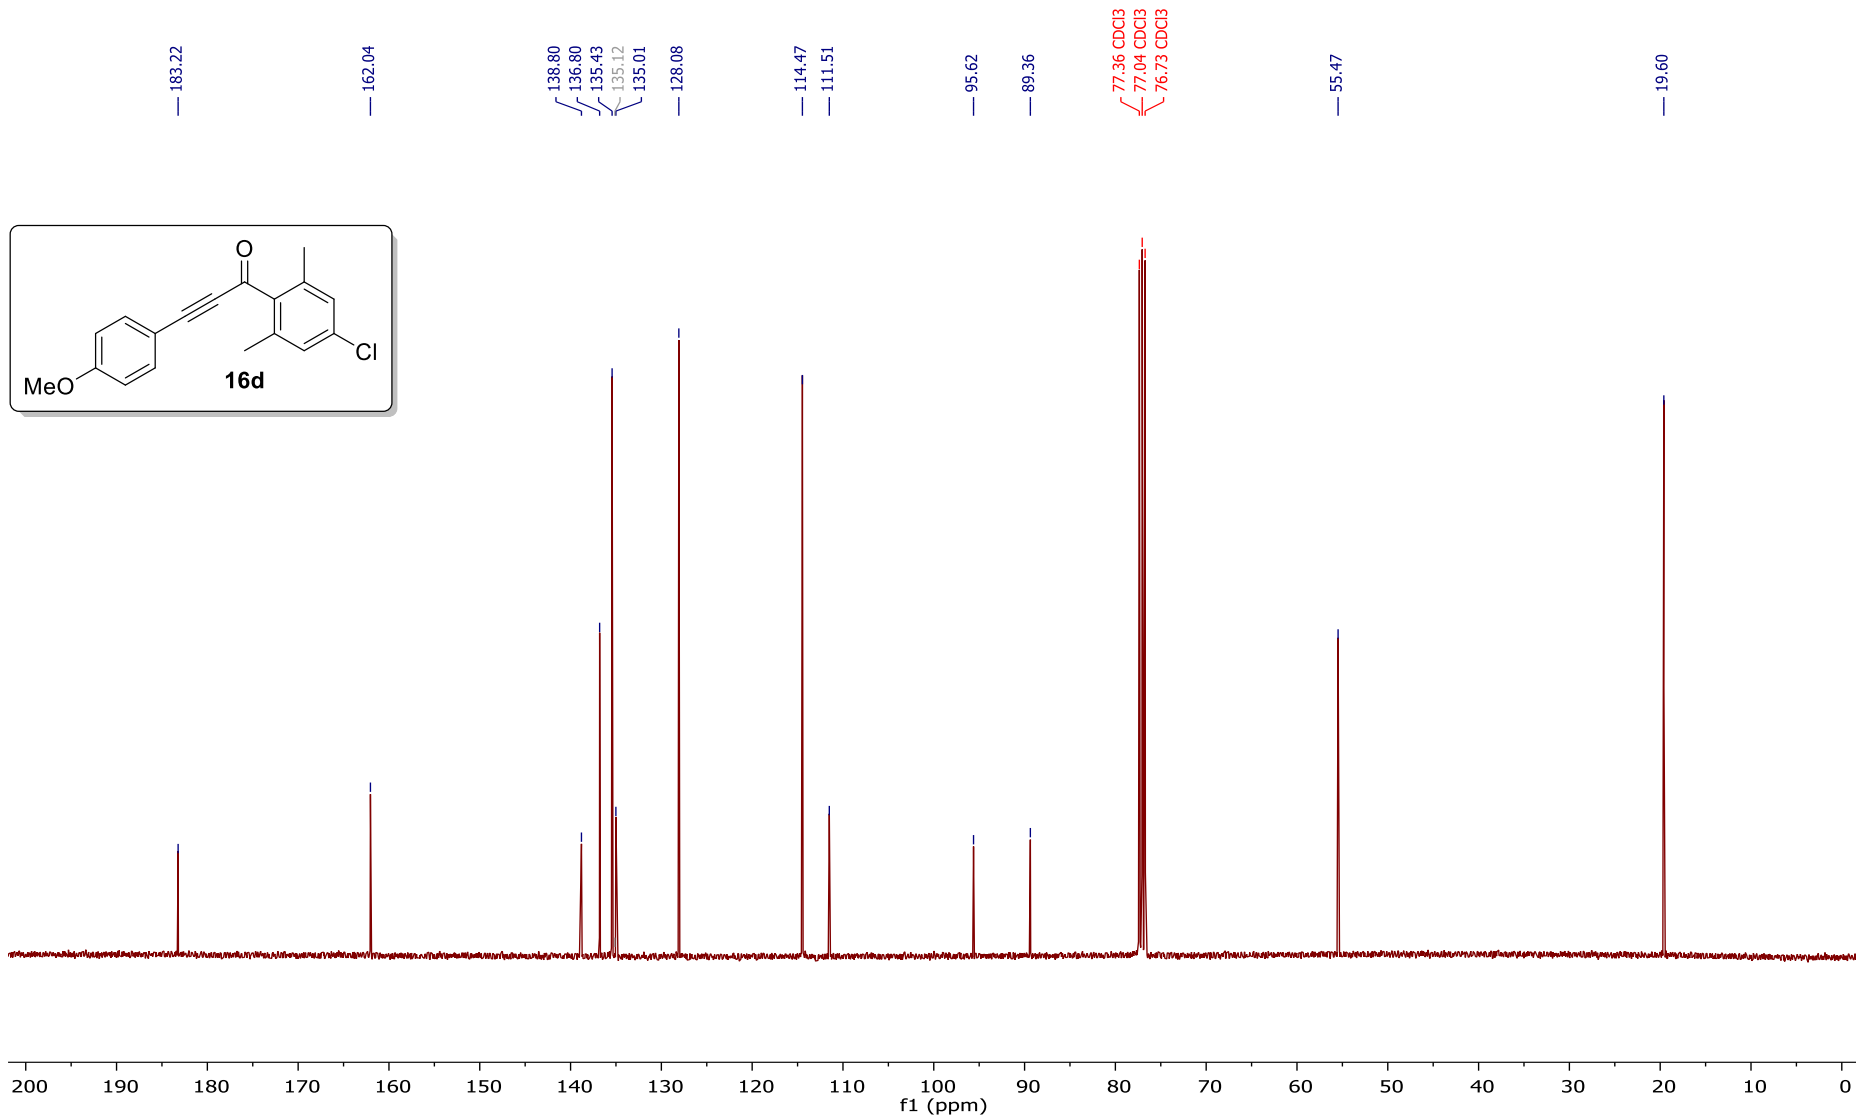

$^1\text{H}$  NMR (400 MHz,  $\text{CDCl}_3$ ):

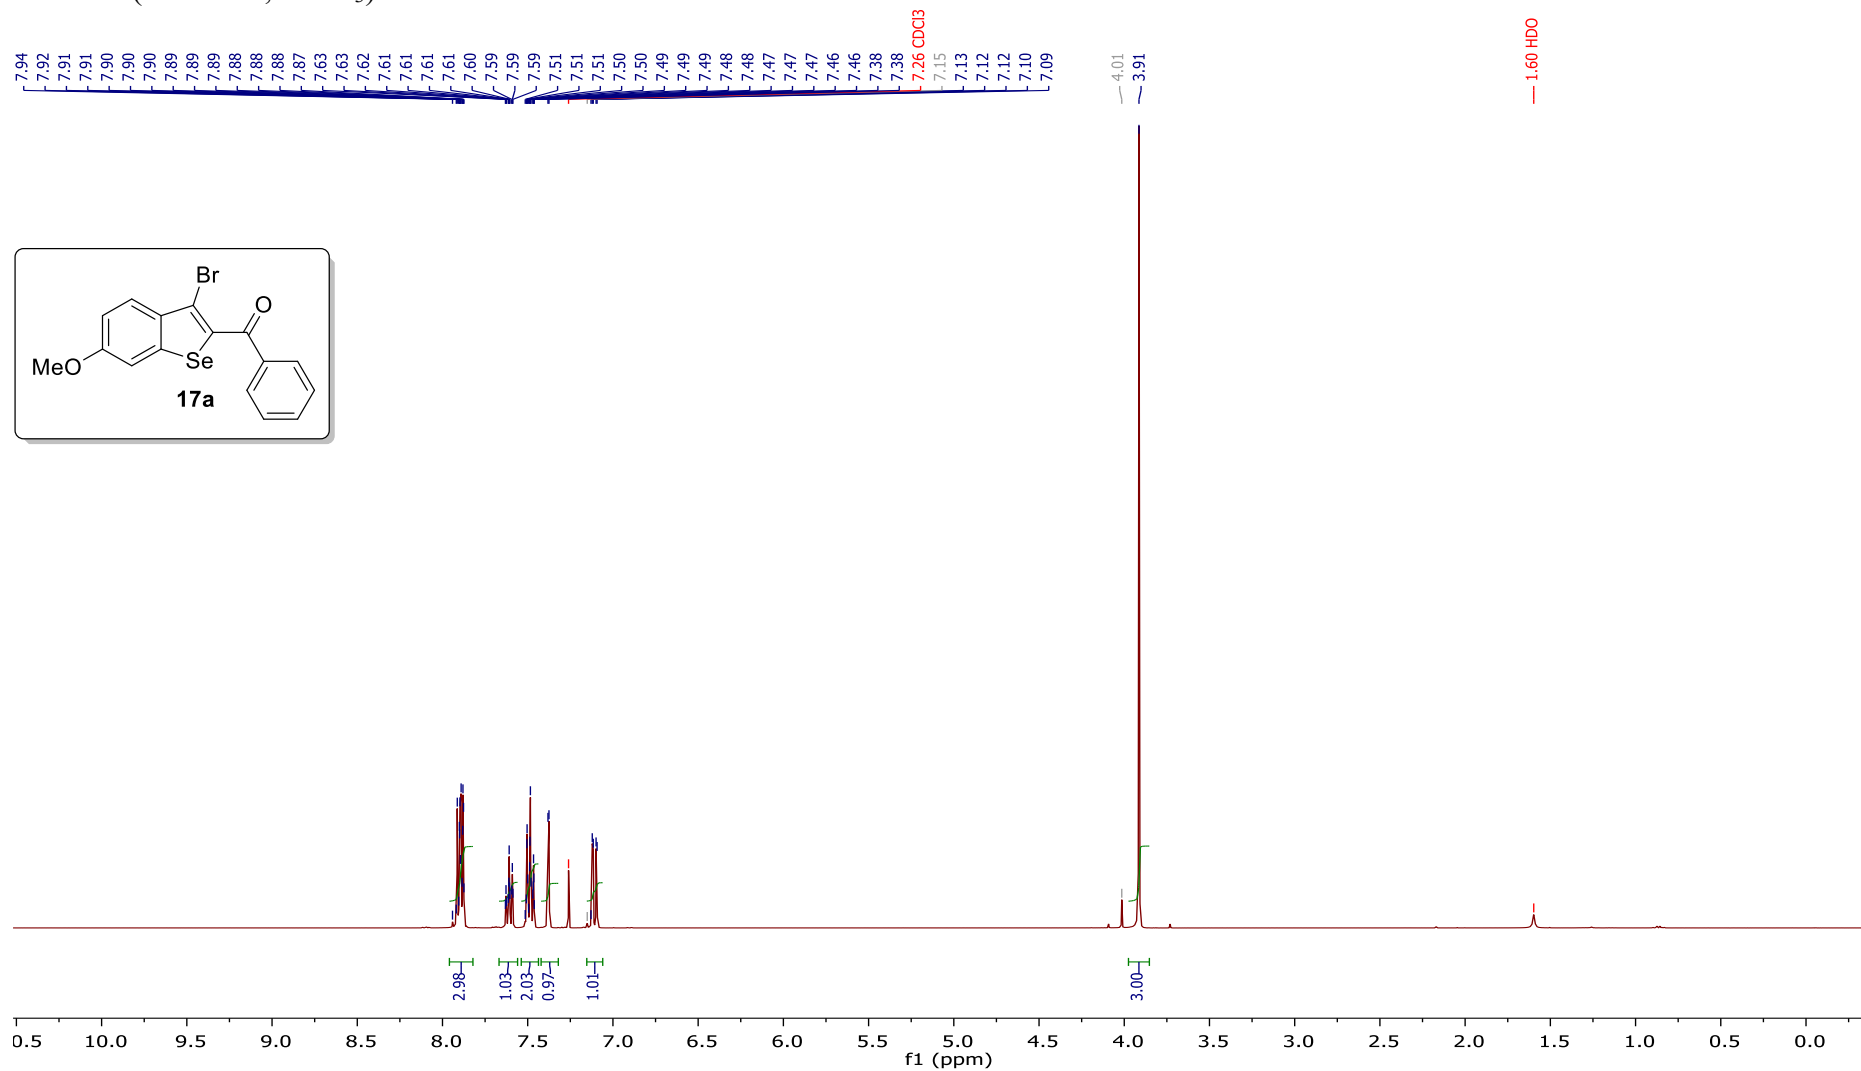

$^{13}\text{C}$  NMR (100.6 MHz,  $\text{CDCl}_3$ ):

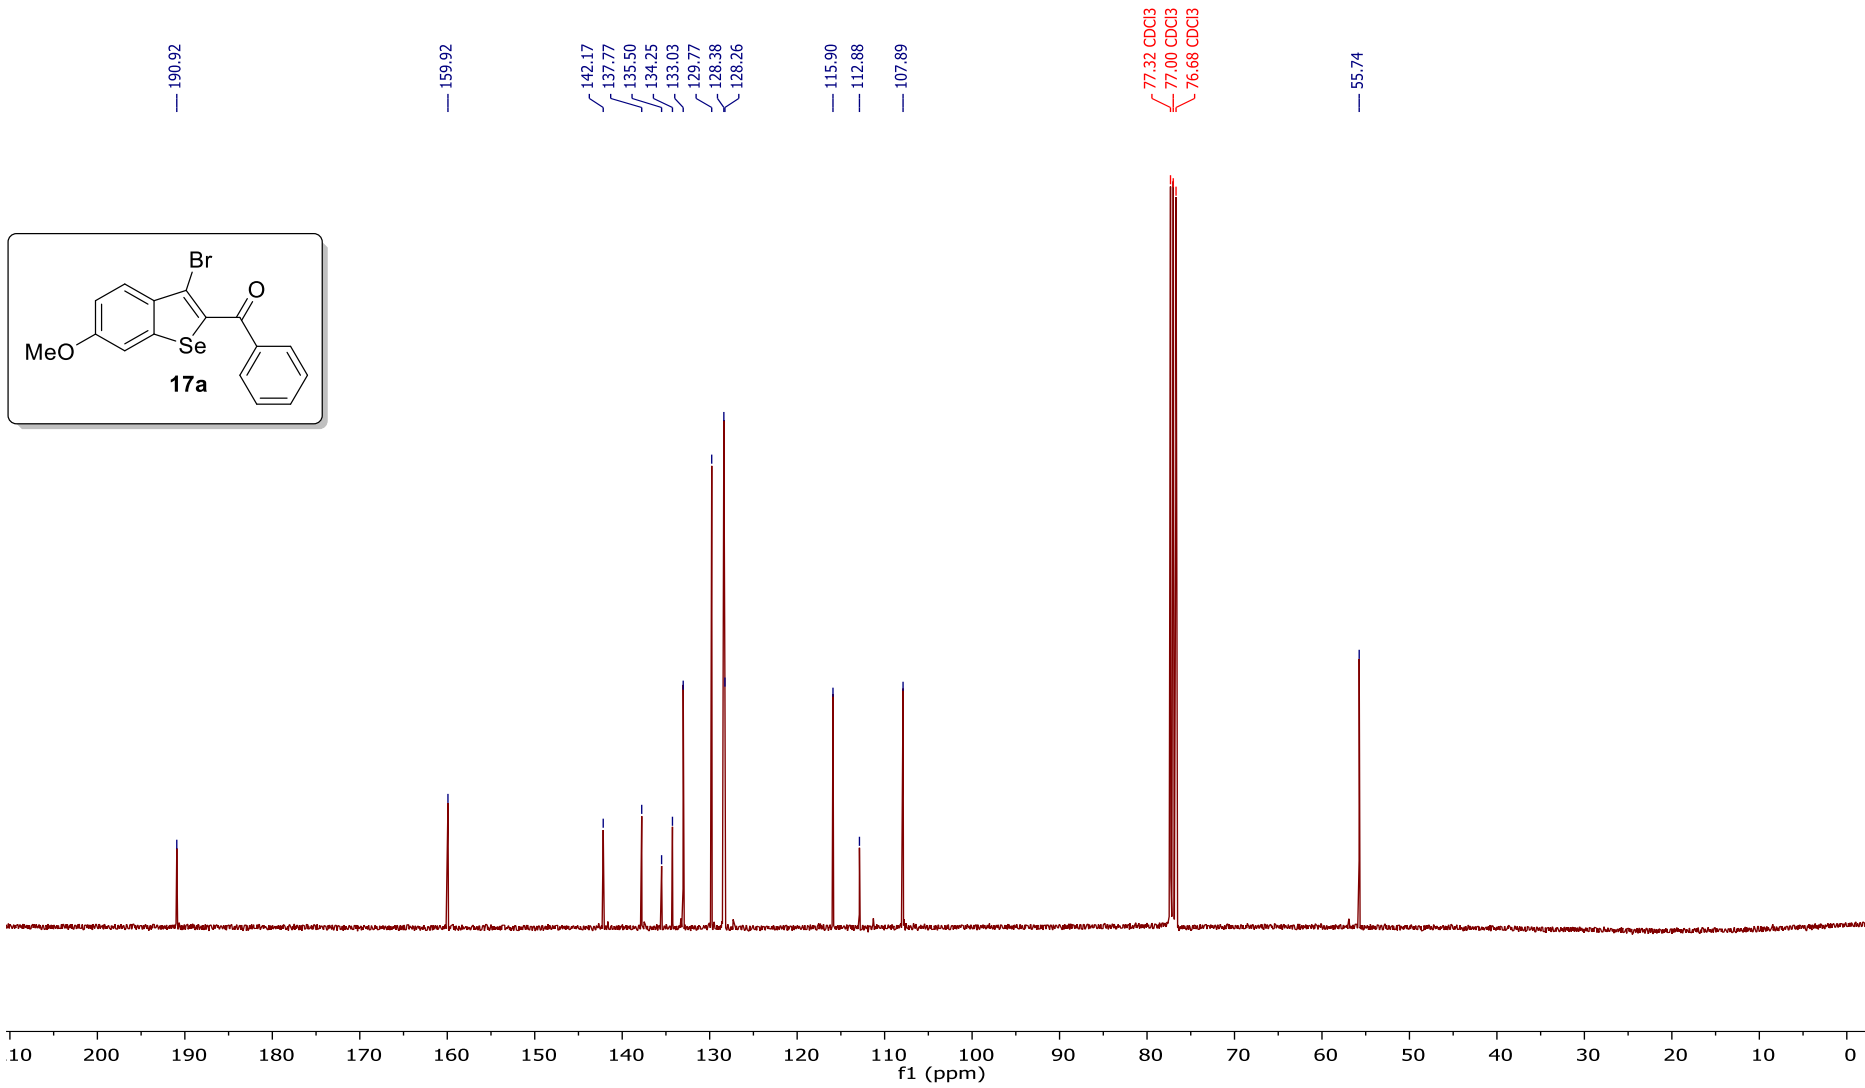

$^{77}\text{Se}$  NMR (76.37 MHz,  $\text{CDCl}_3$ ):

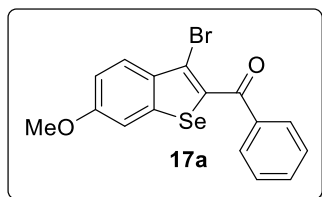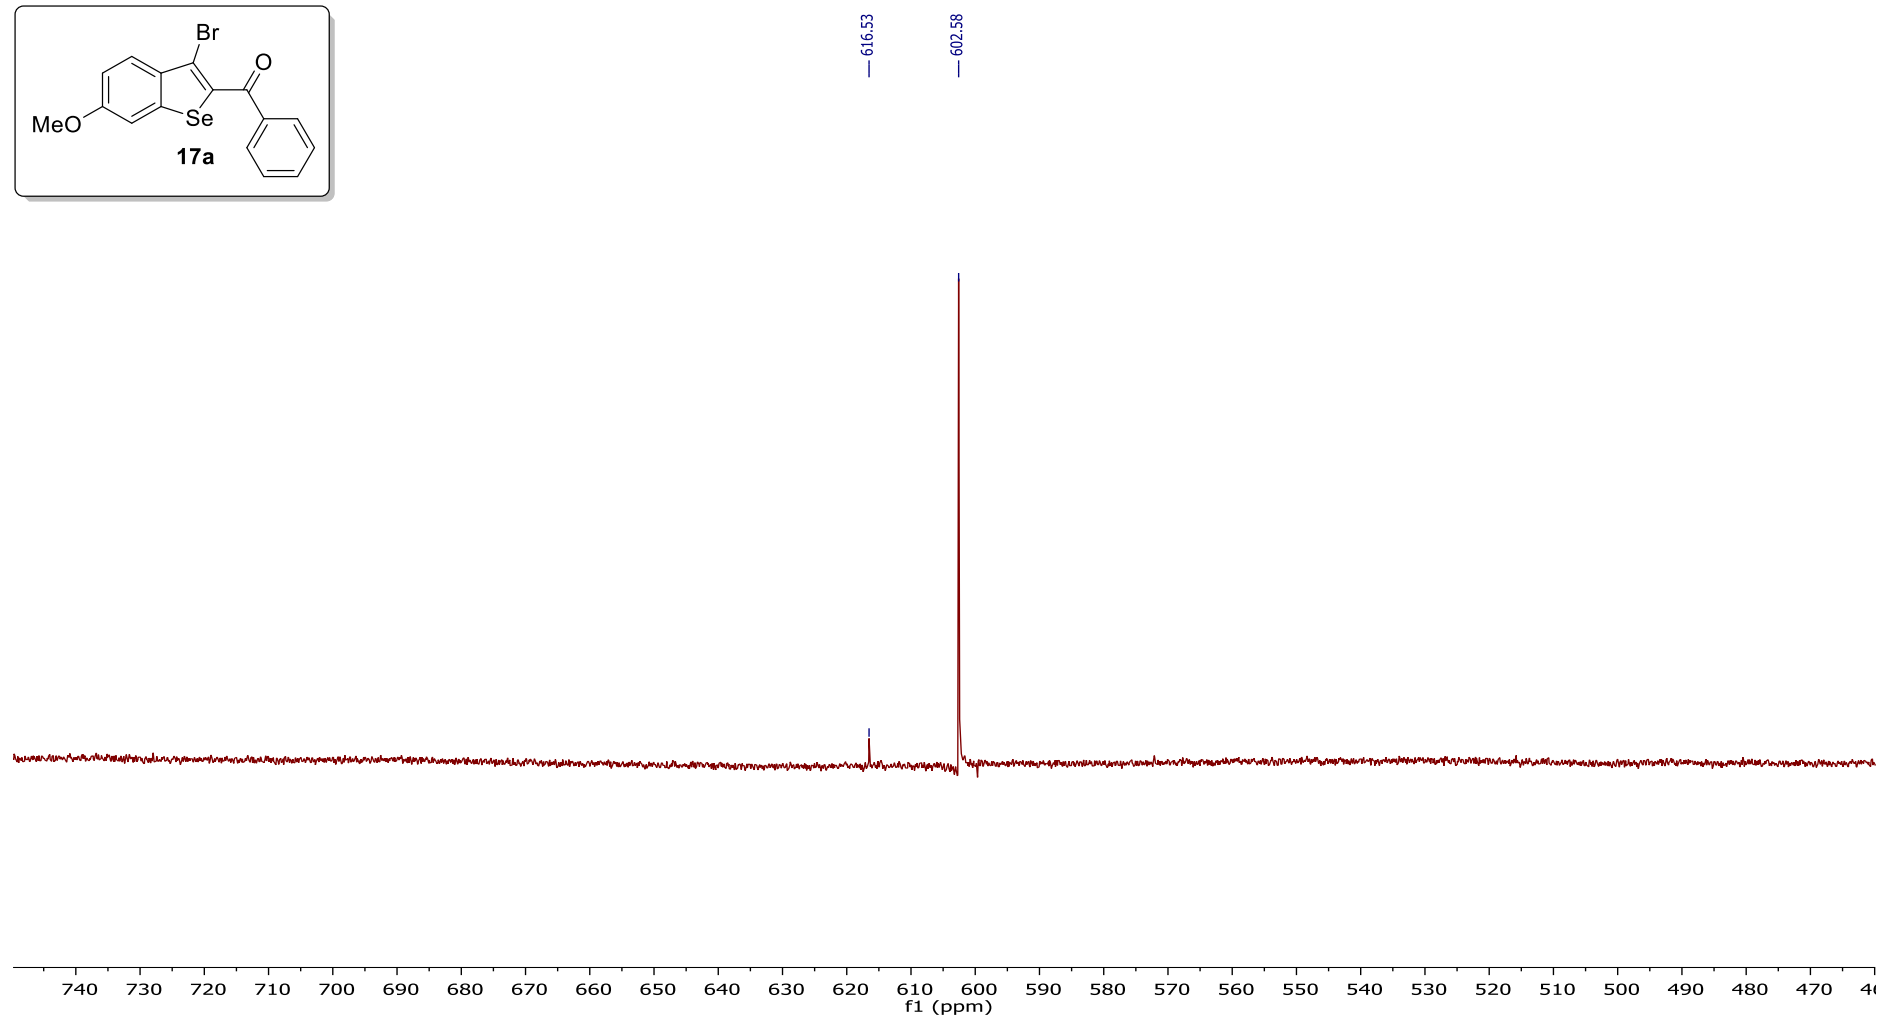



$^1\text{H}$  NMR (400 MHz,  $\text{CDCl}_3$ ):

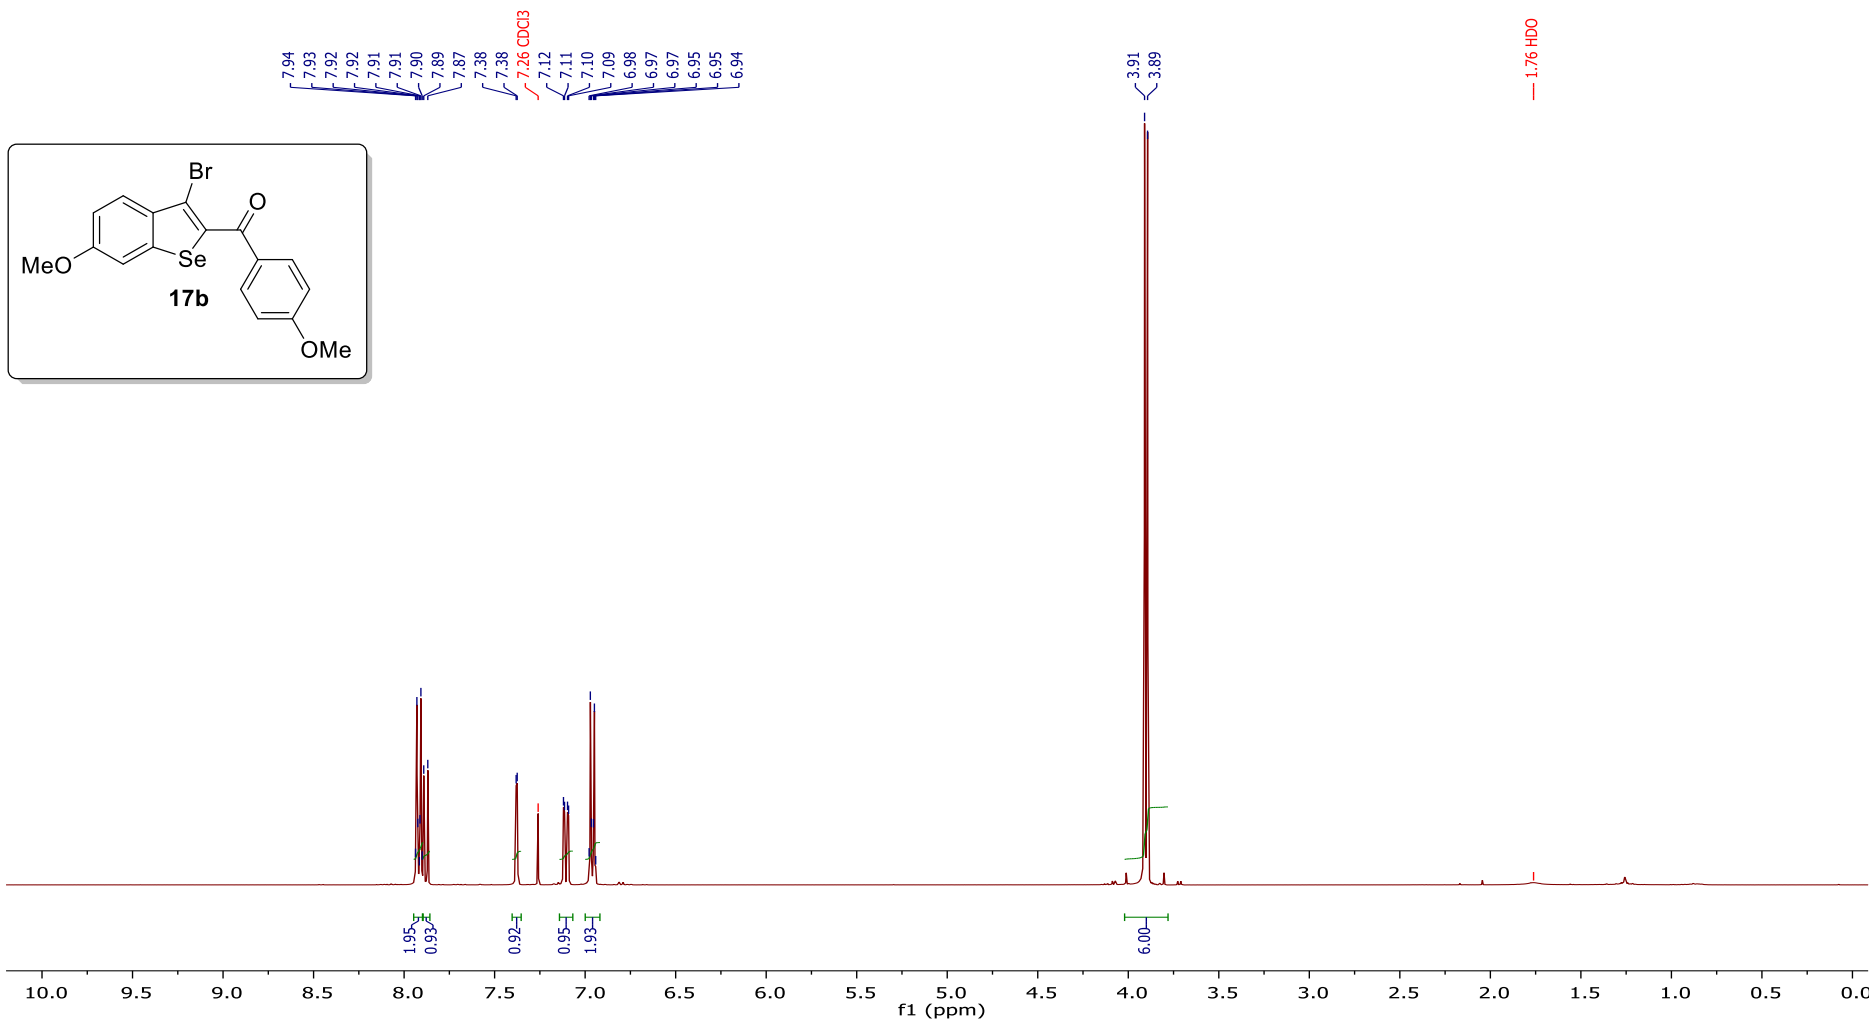

$^{13}\text{C}$  NMR (100.6 MHz,  $\text{CDCl}_3$ ):

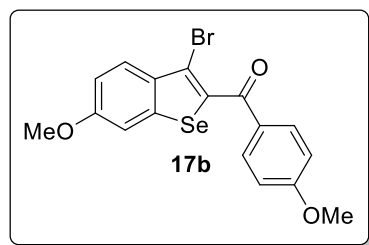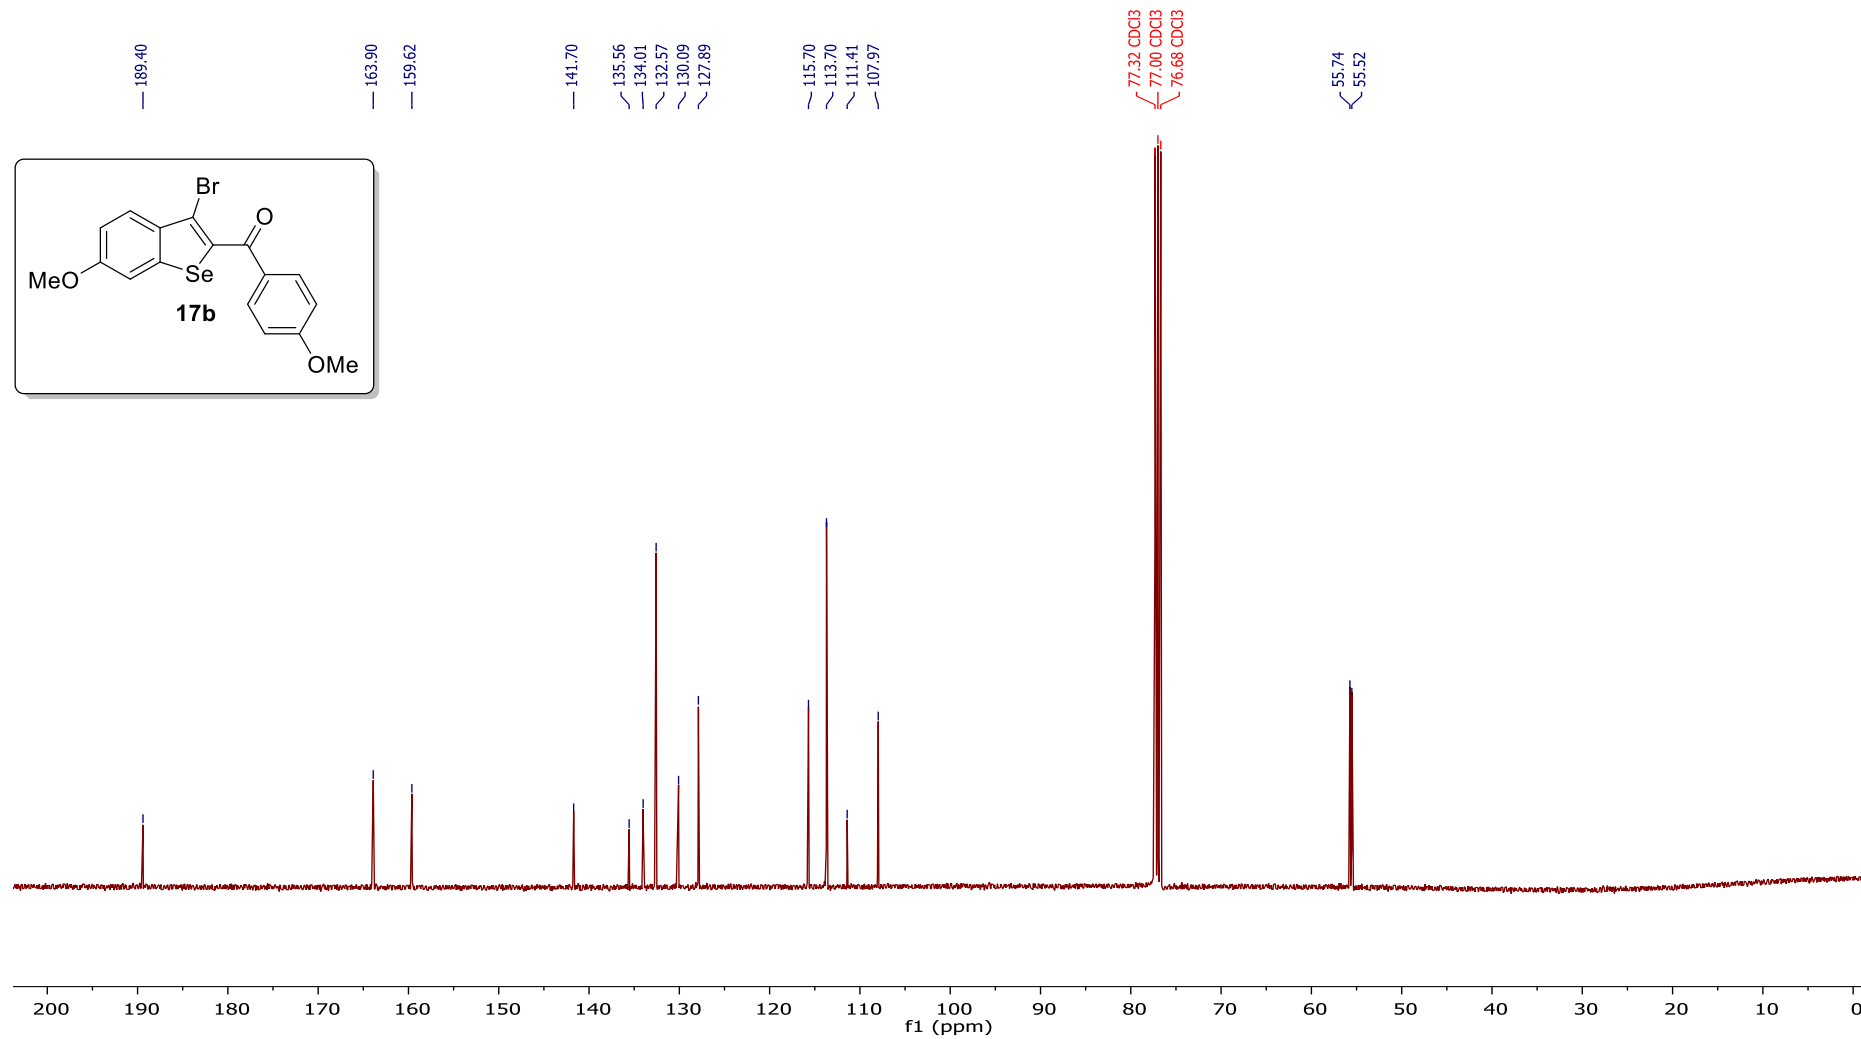

$^{77}\text{Se}$  NMR (76.37 MHz,  $\text{CDCl}_3$ ):

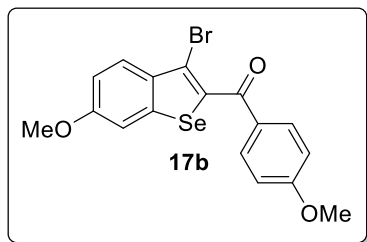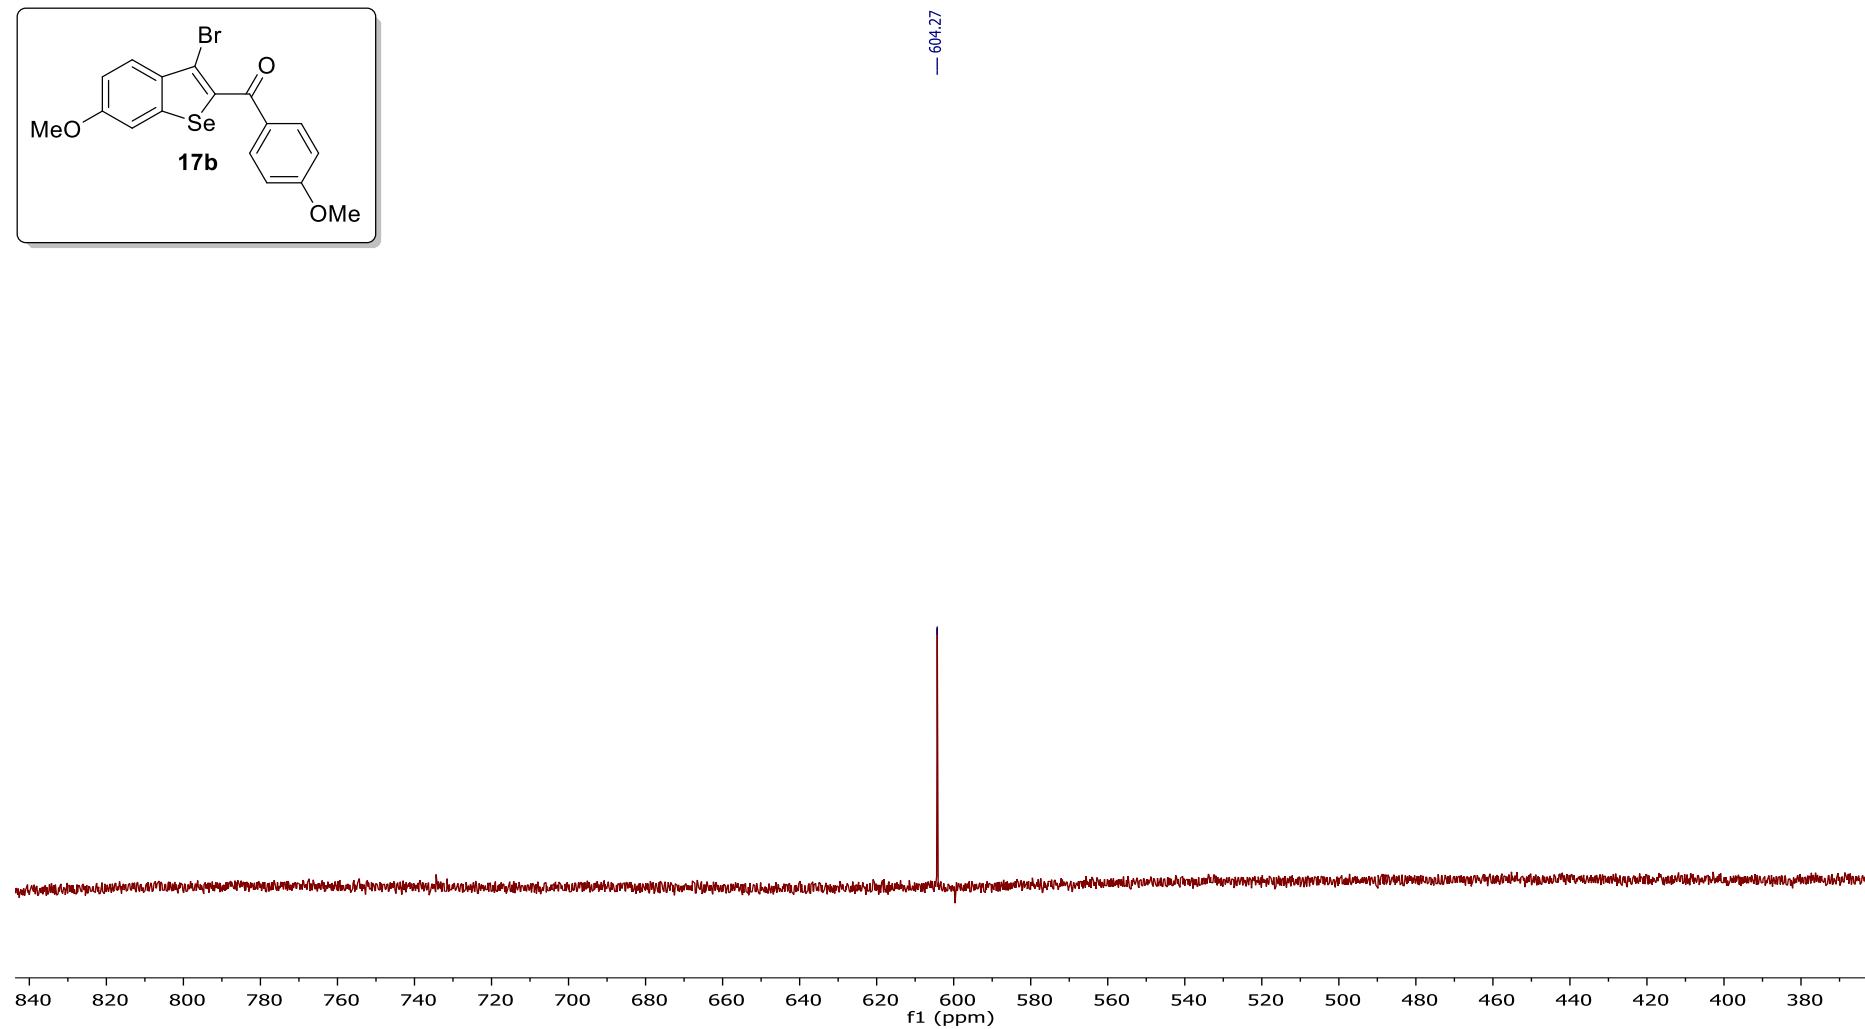

$^1\text{H}$  NMR (400 MHz,  $\text{CDCl}_3$ ):

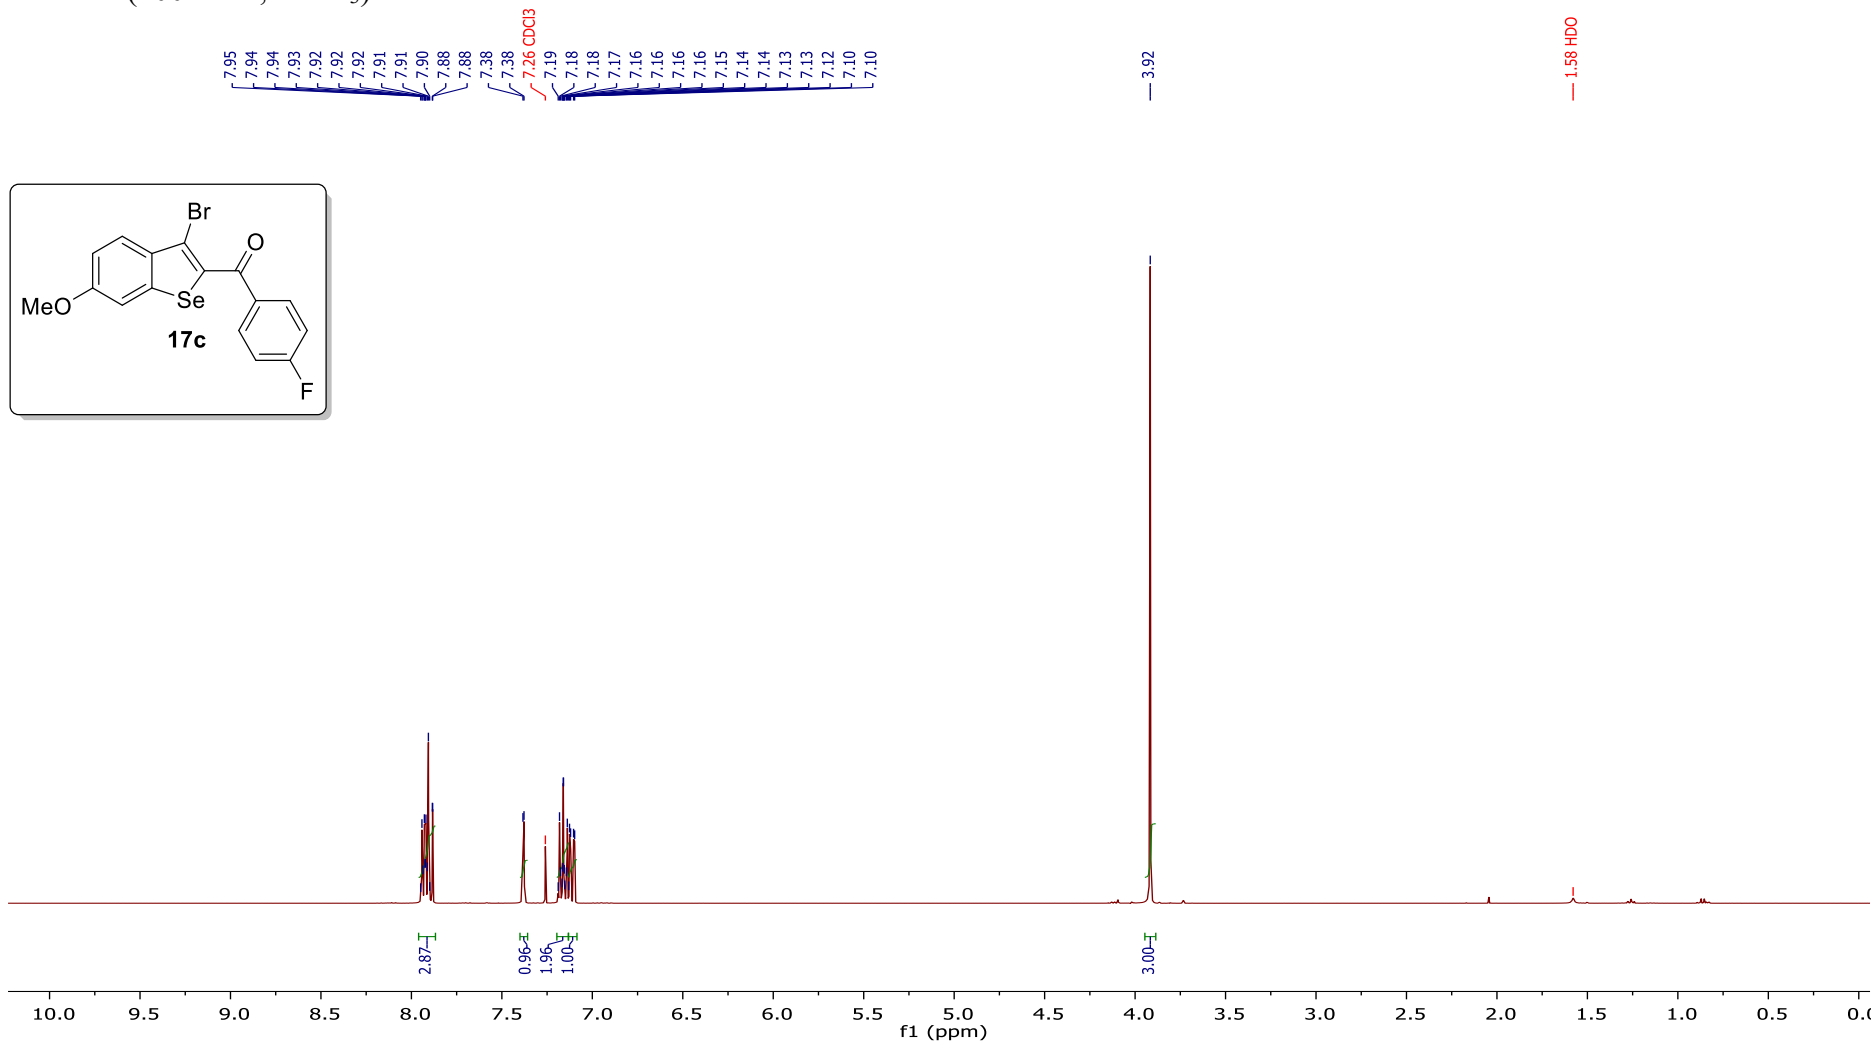

$^{13}\text{C}$  NMR (100.6 MHz,  $\text{CDCl}_3$ ):

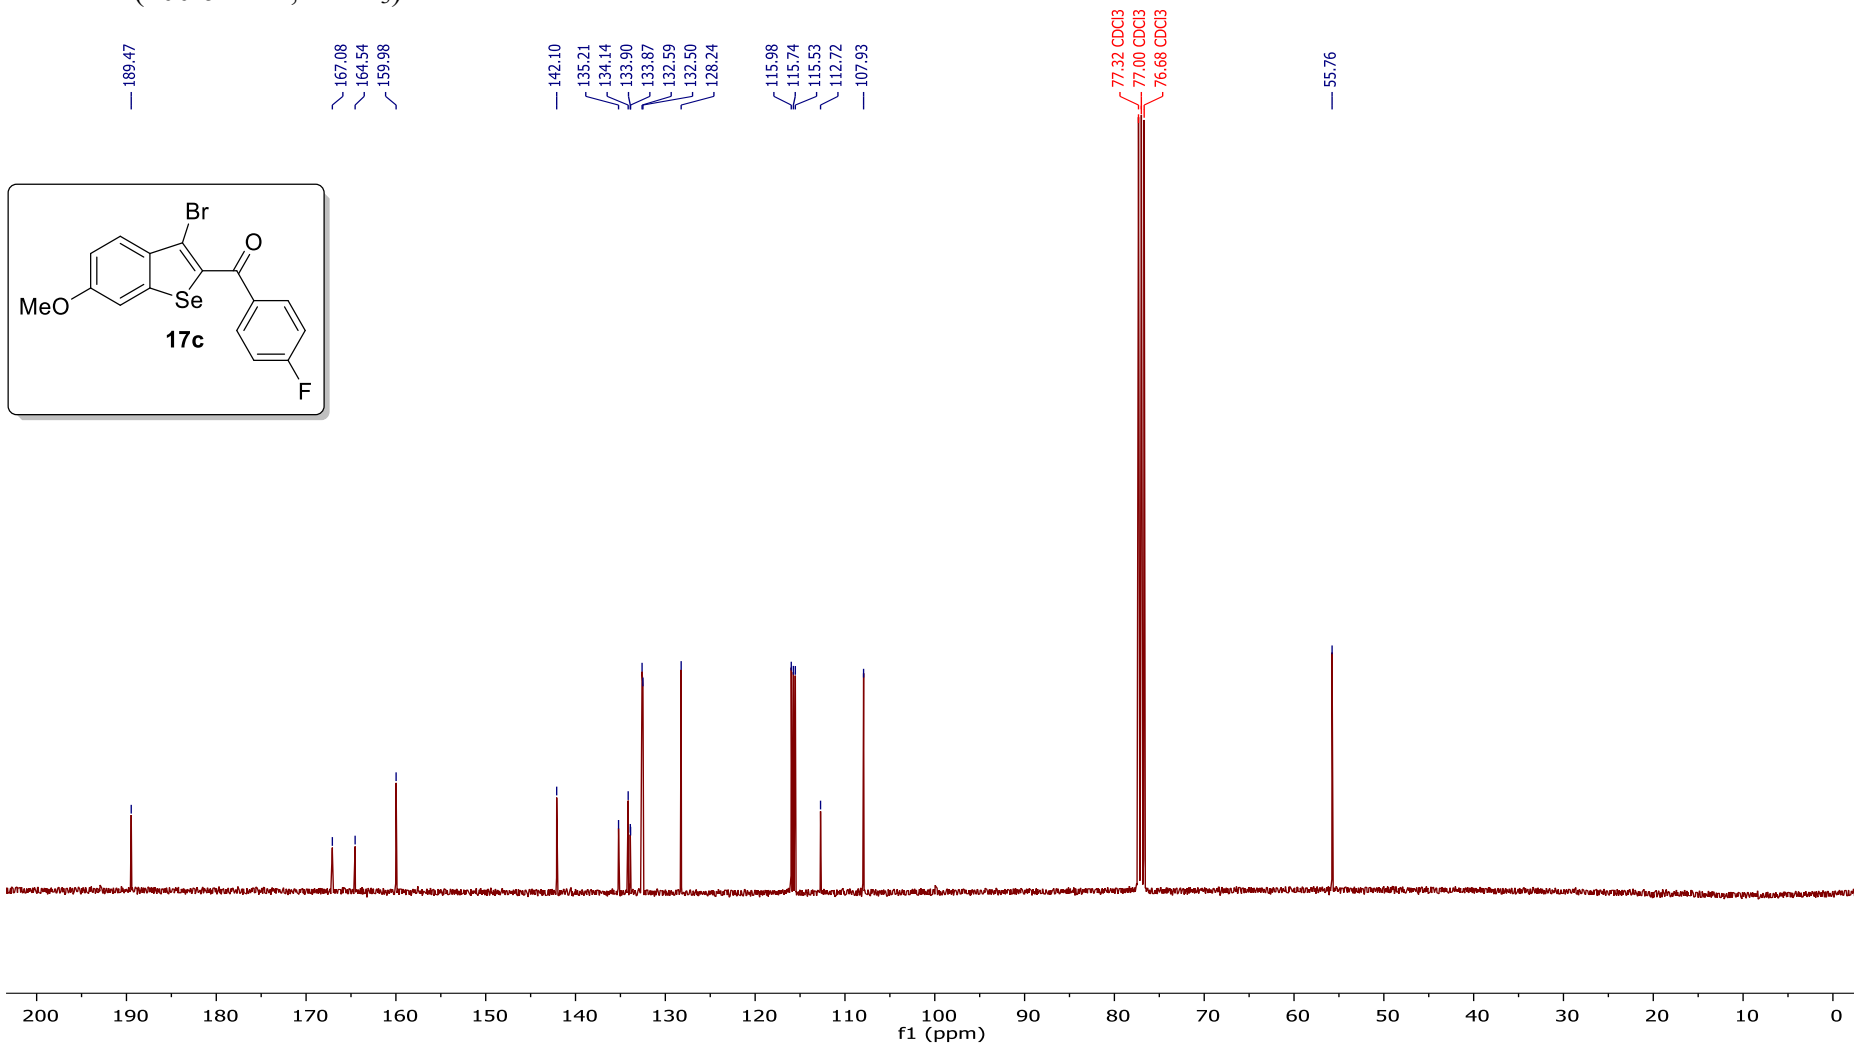

$^{19}\text{F}$  NMR (376.21 MHz,  $\text{CDCl}_3$ ):

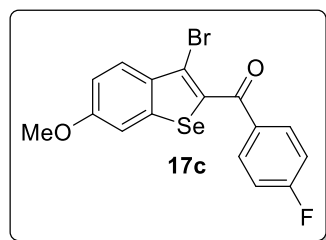

-104.64  
-104.65  
-104.66  
-104.67  
-104.68  
-104.69  
-104.70  
-104.71  
-104.72

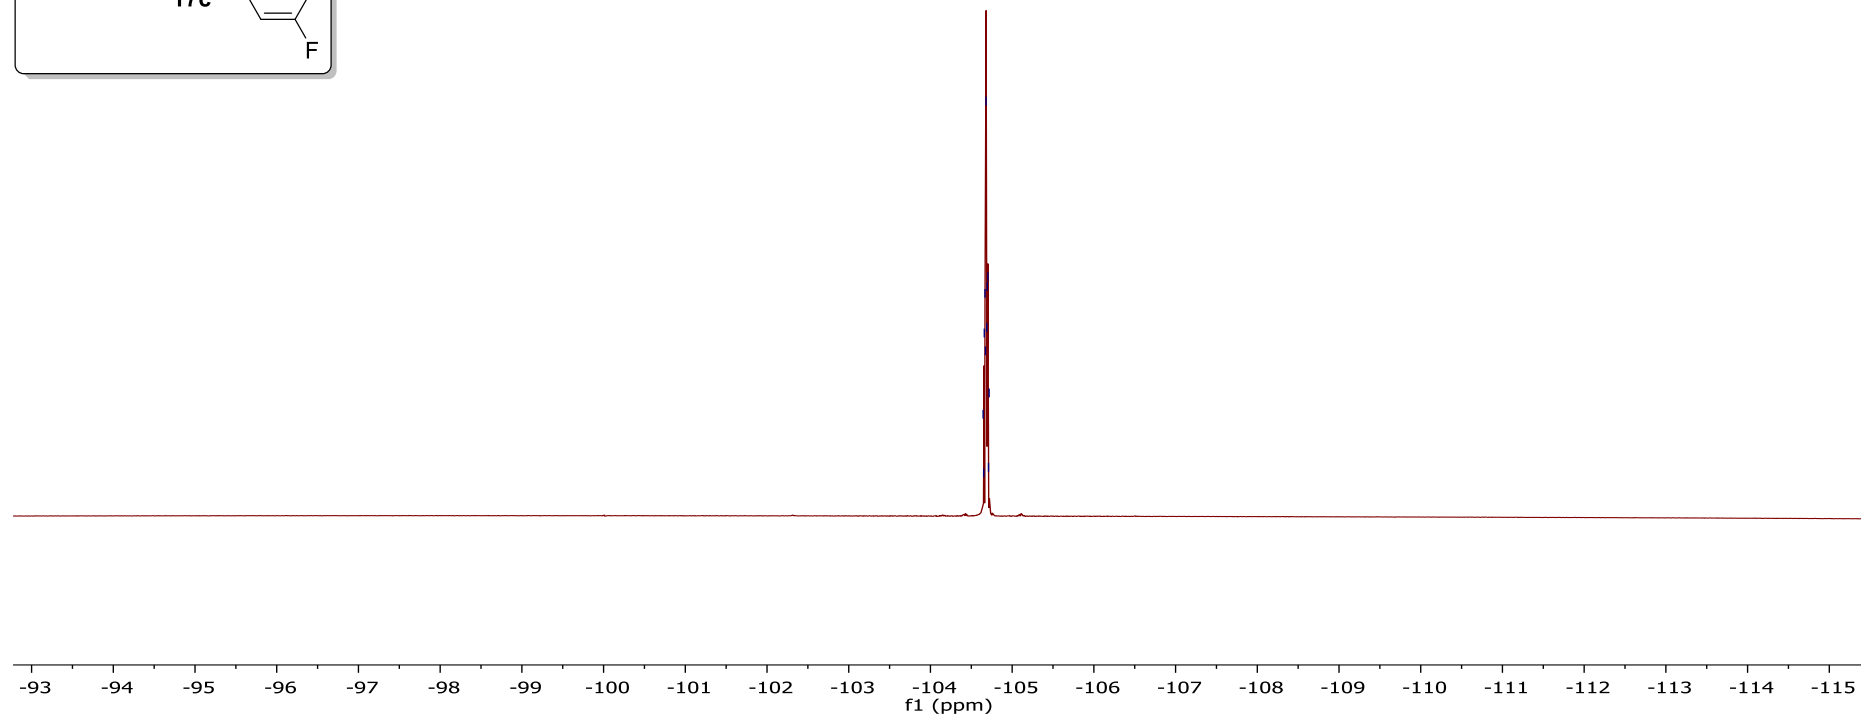

$^{77}\text{Se}$  NMR (76.37 MHz,  $\text{CDCl}_3$ ):

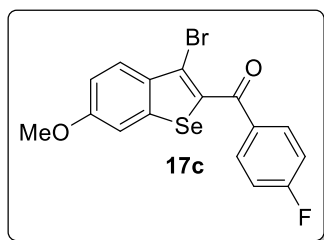

— 604.19

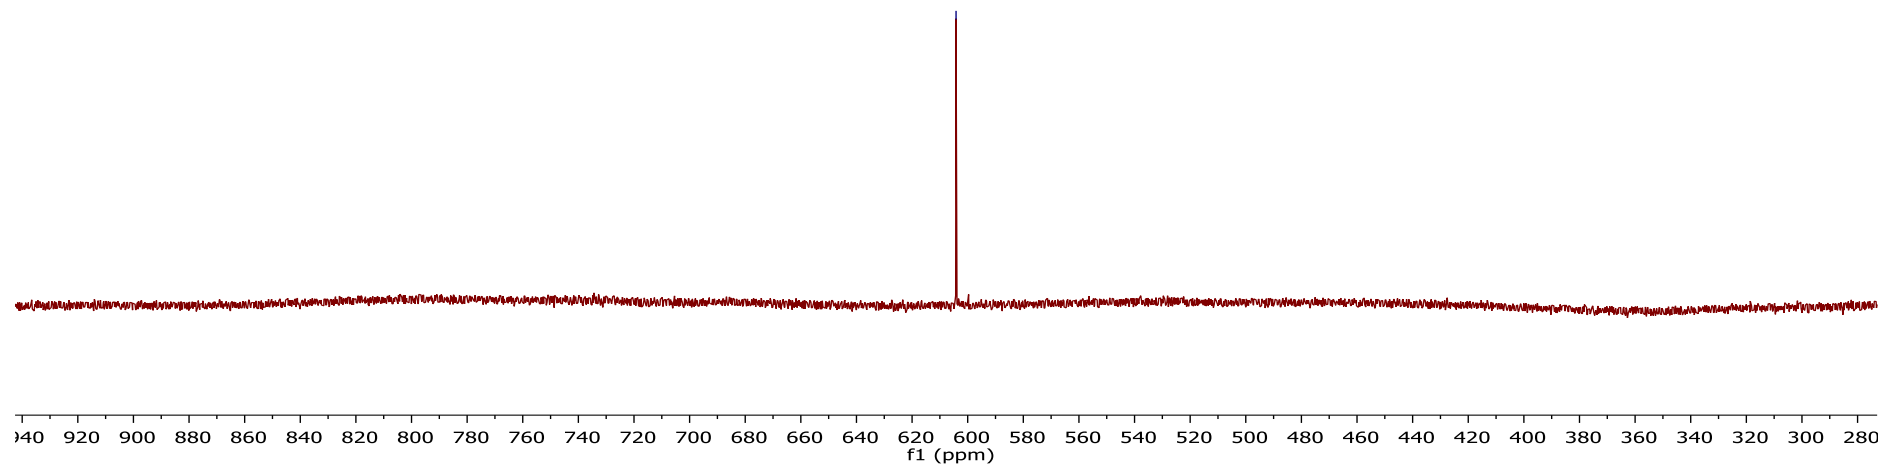

$^1\text{H}$  NMR (400 MHz,  $\text{CDCl}_3$ ):

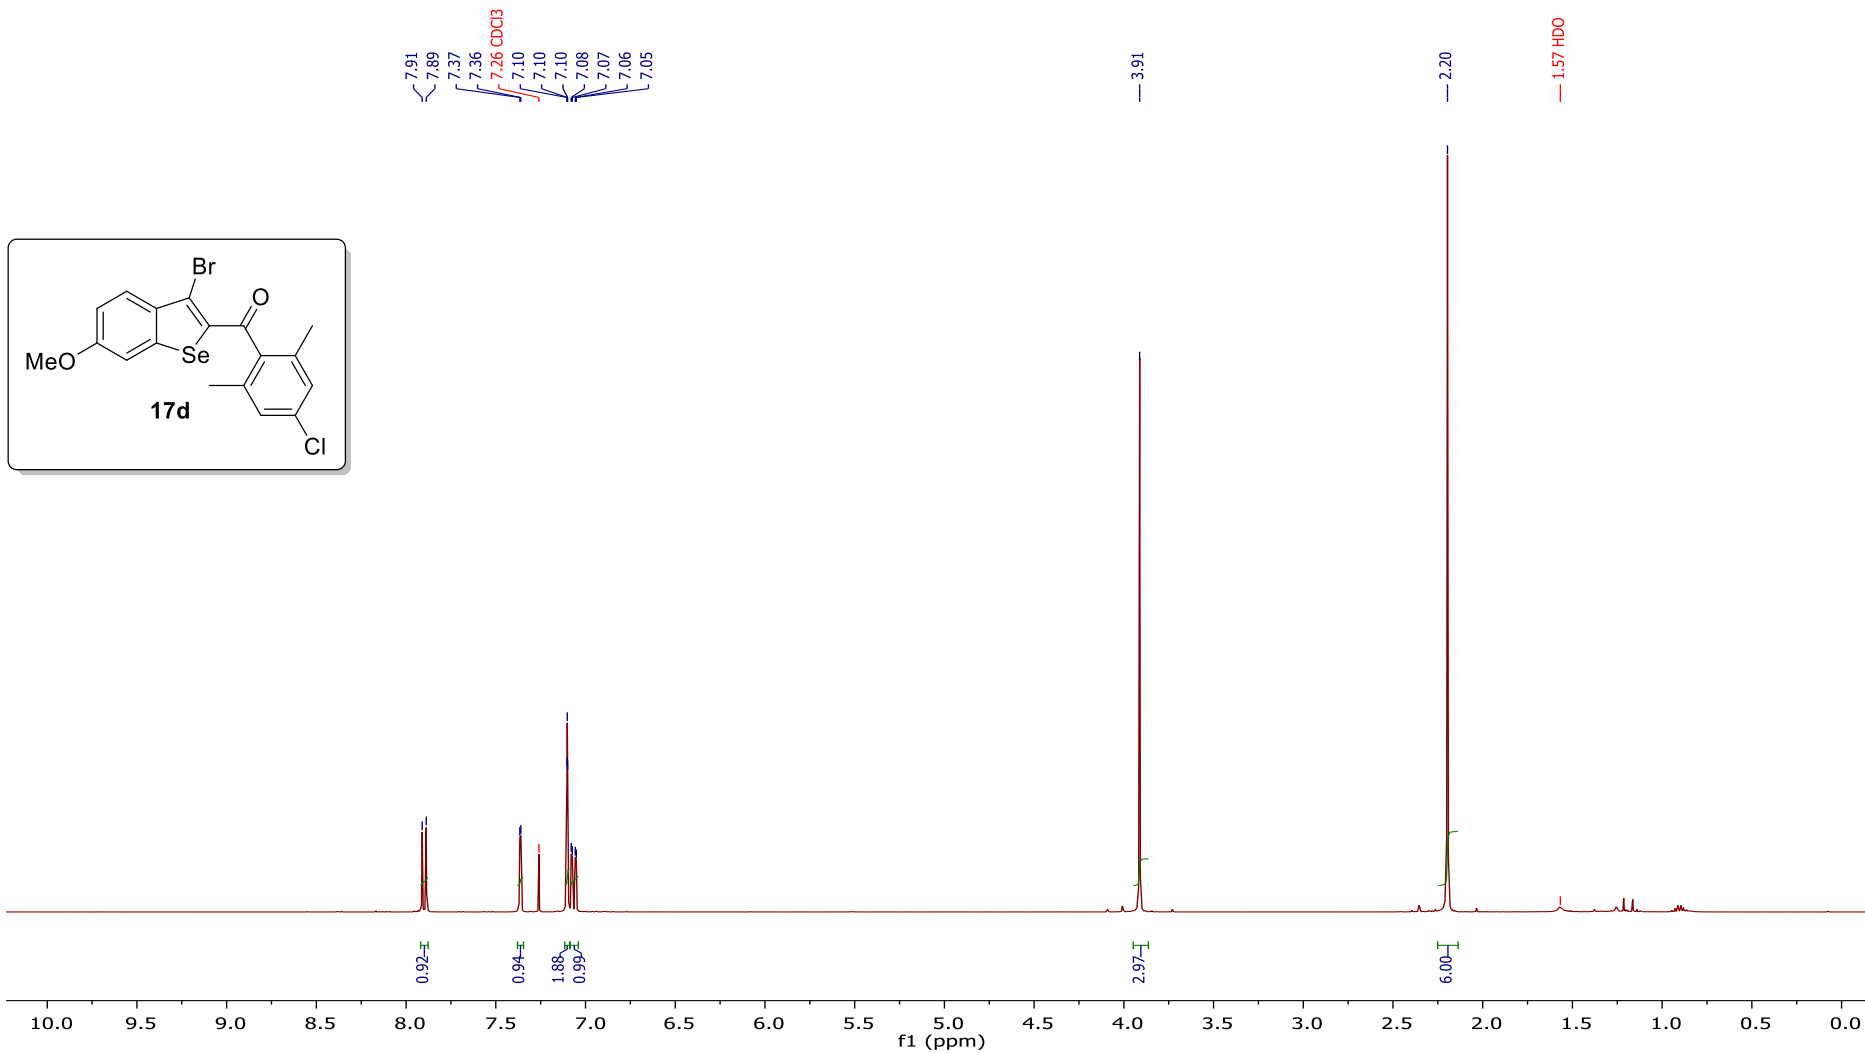



$^{13}\text{C}$  NMR (100.6 MHz,  $\text{CDCl}_3$ ):

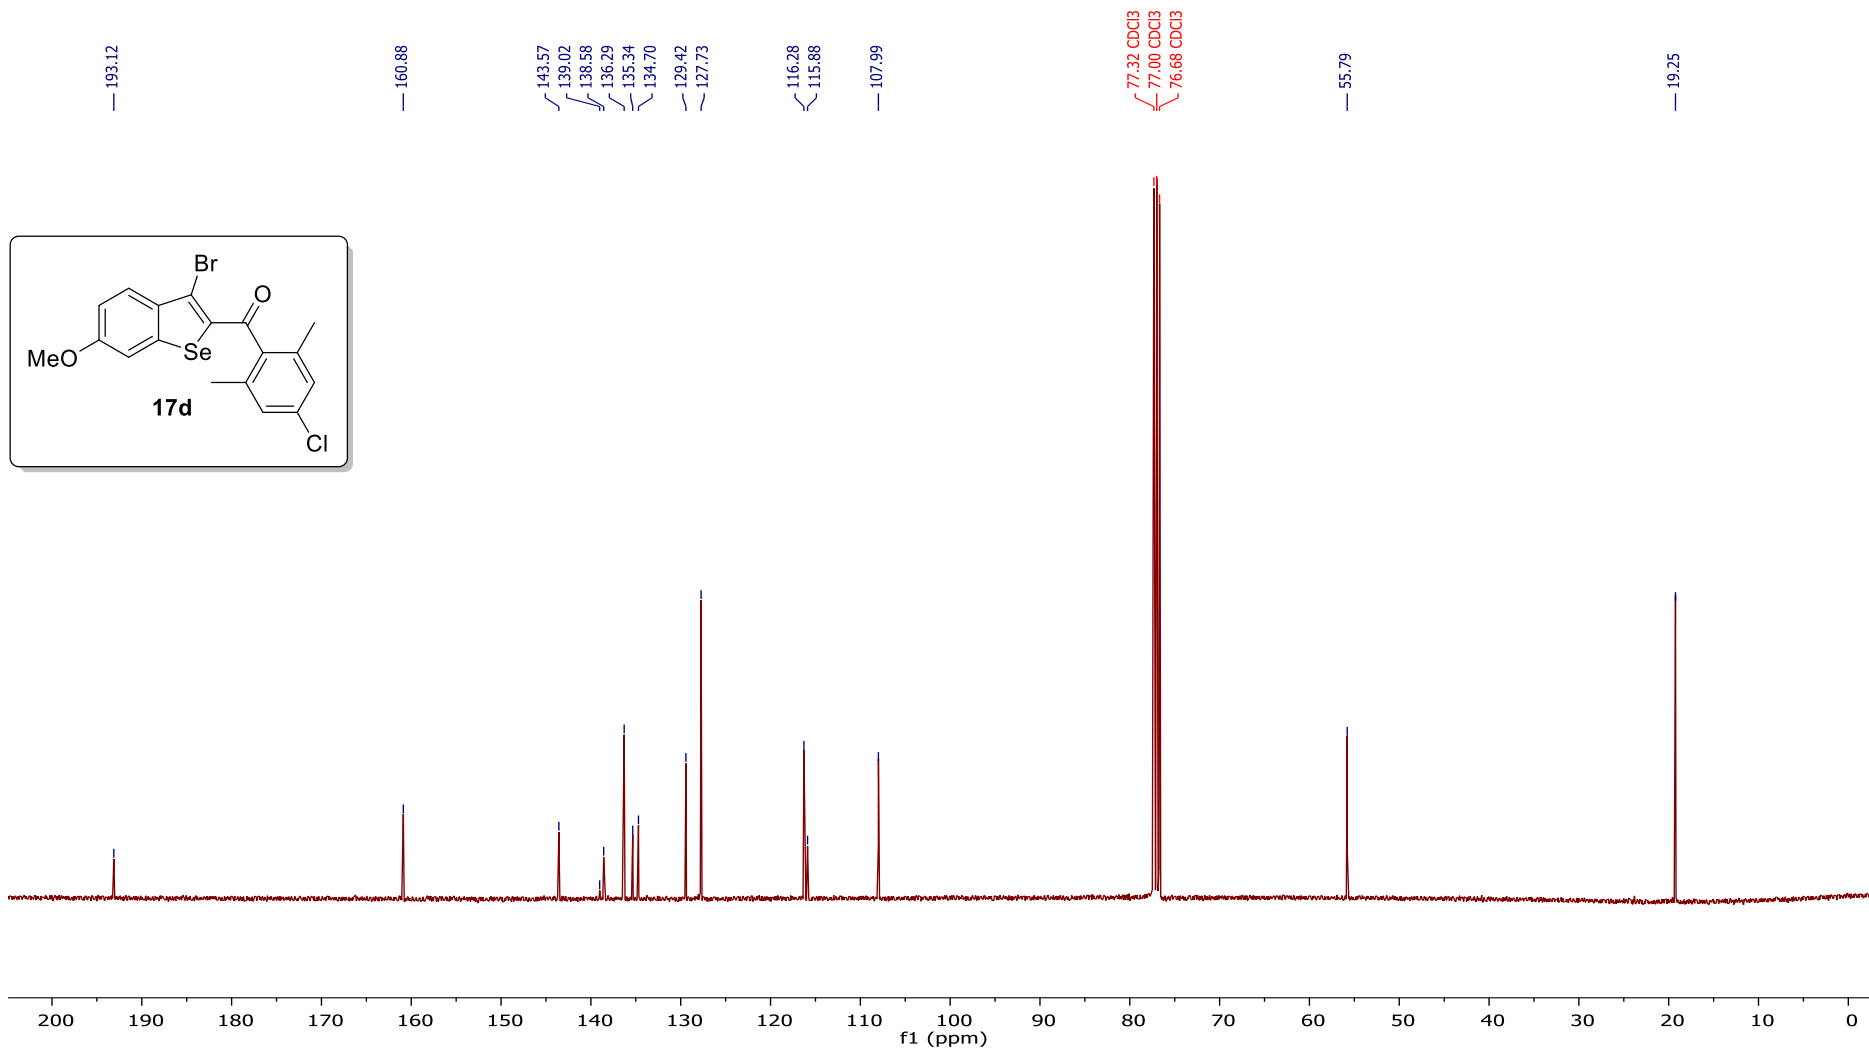

$^{77}\text{Se}$  NMR (76.37 MHz,  $\text{CDCl}_3$ ):

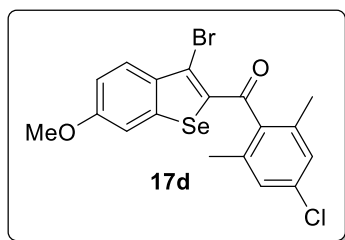

— 570.29

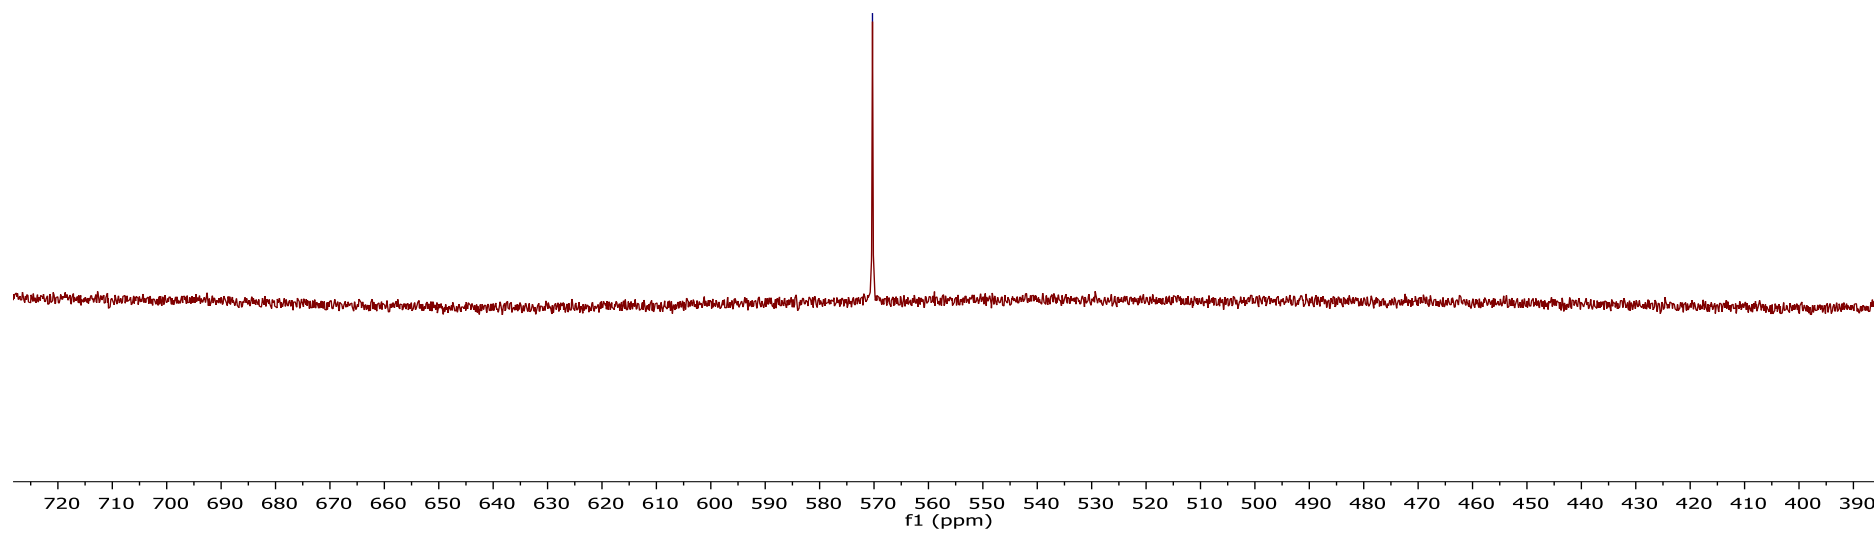

$^1\text{H}$  NMR (400 MHz,  $\text{CDCl}_3$ ):

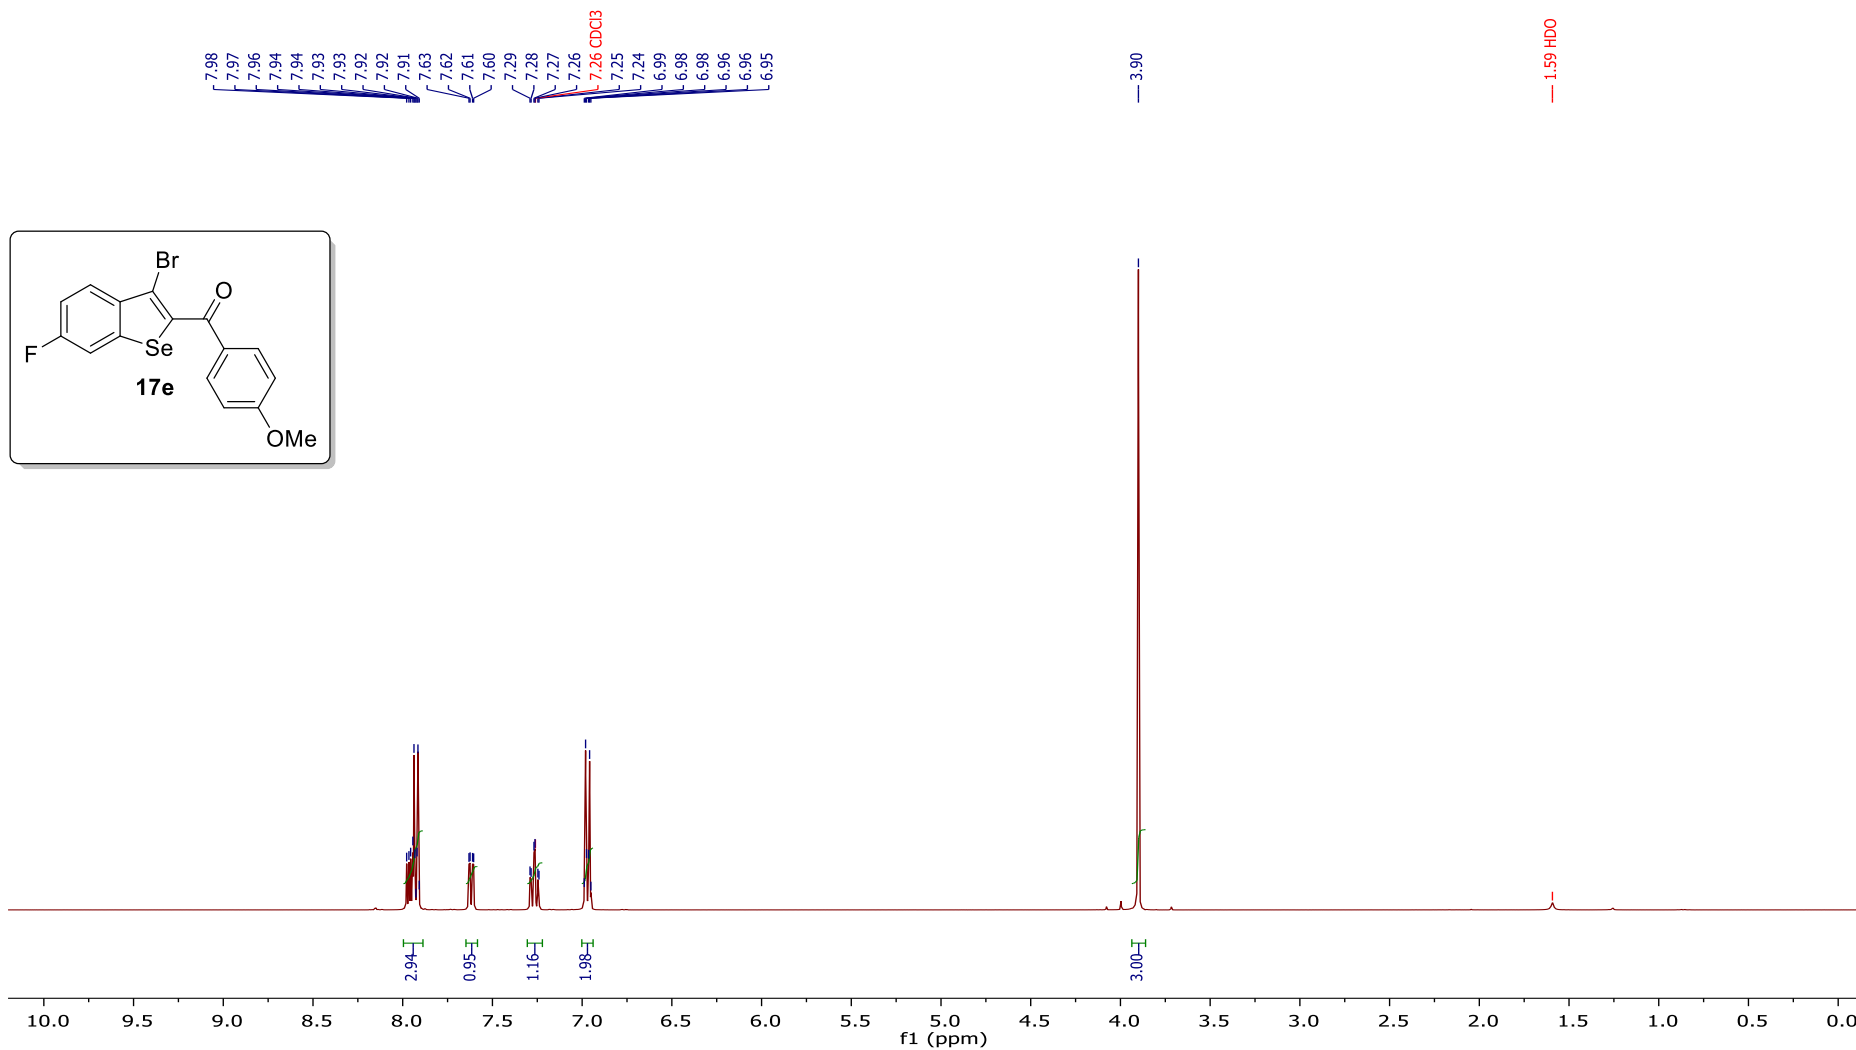

$^{13}\text{C}$  NMR (100.6 MHz,  $\text{CDCl}_3$ ):

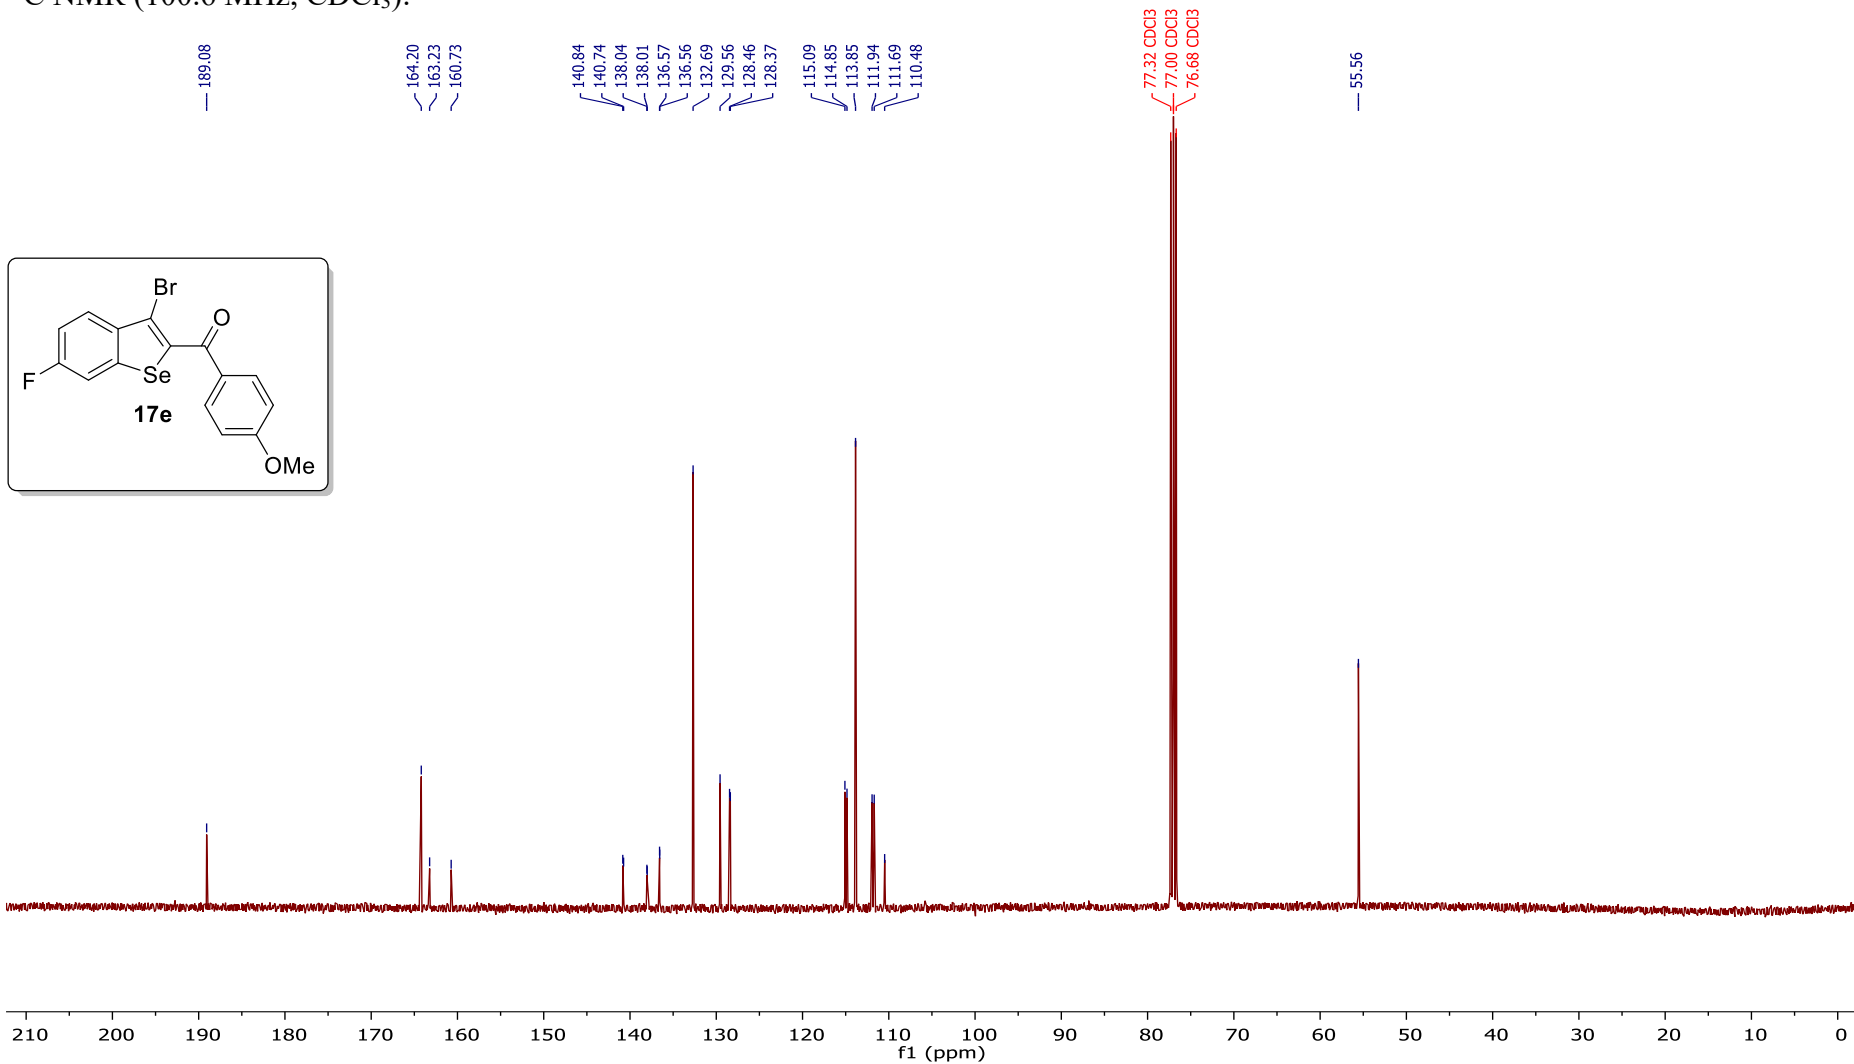

$^{19}\text{F}$  NMR (376.21 MHz,  $\text{CDCl}_3$ ):

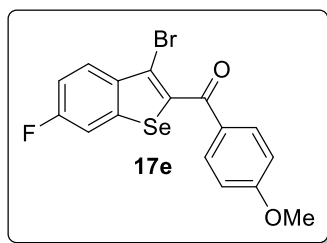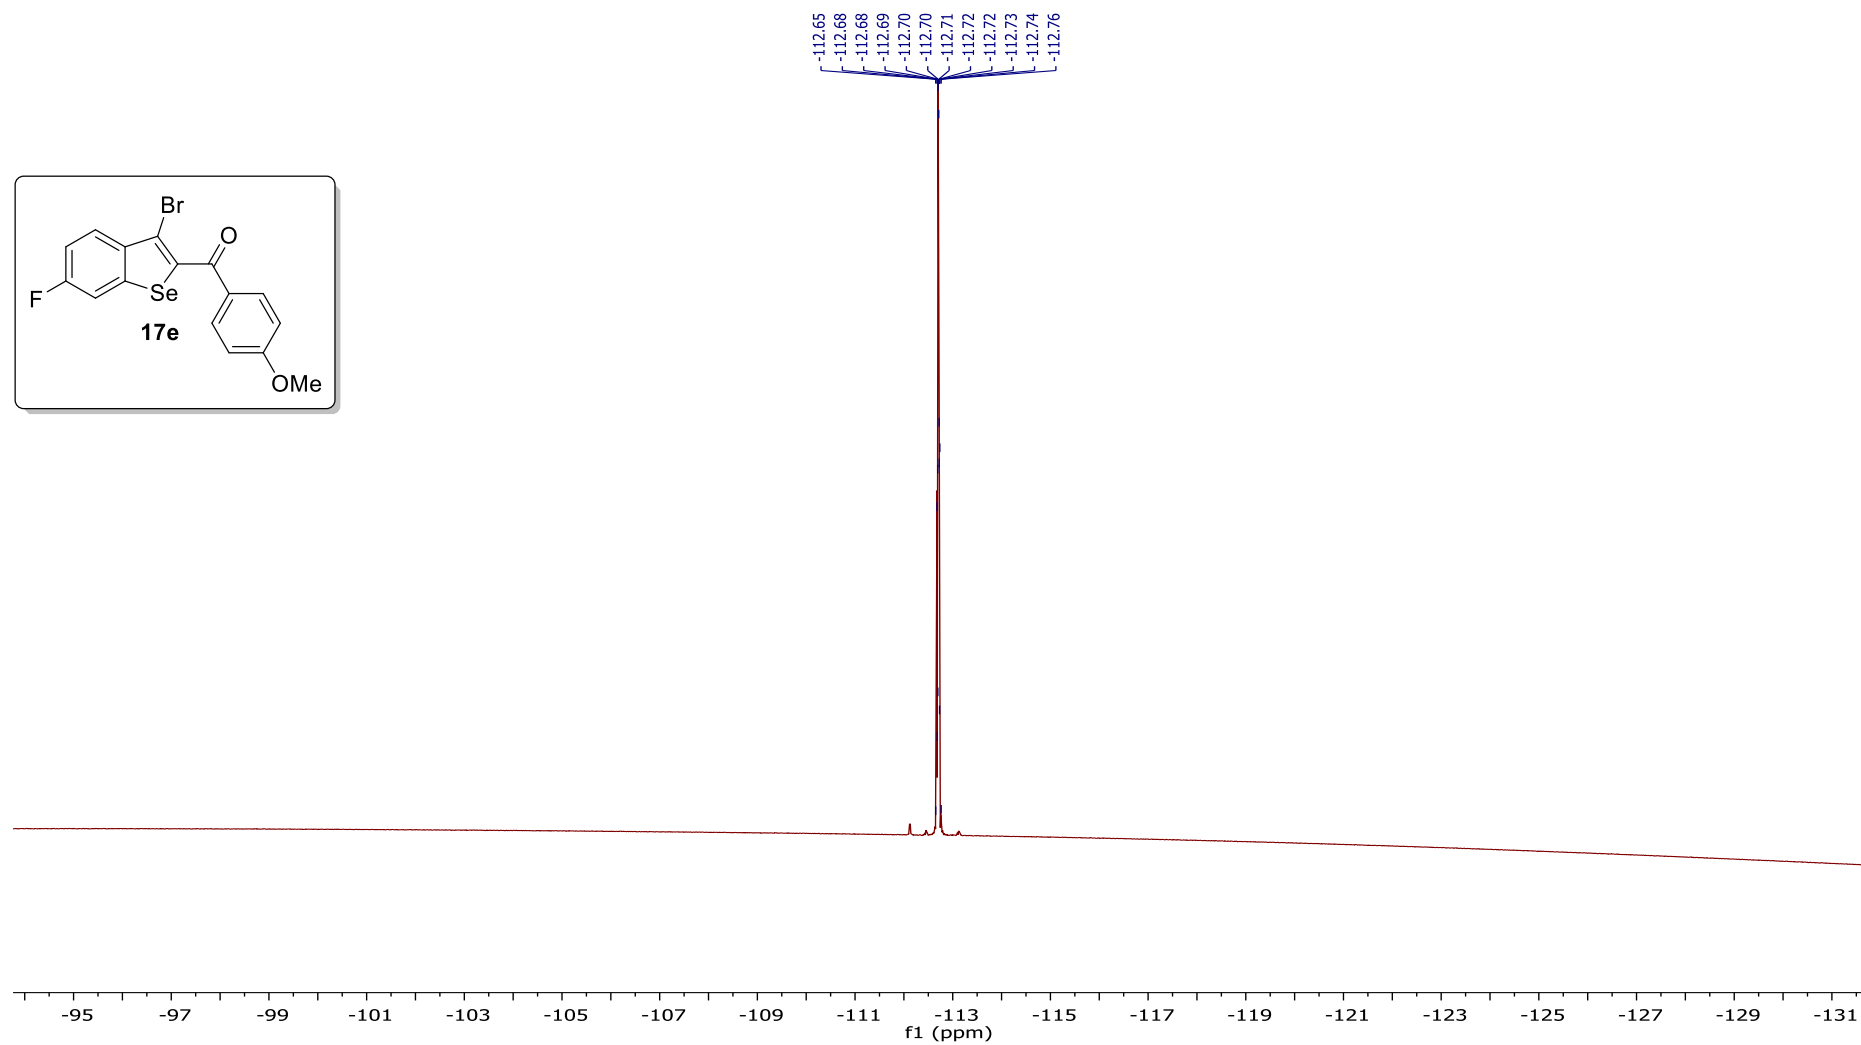

$^{77}\text{Se}$  NMR (76.37 MHz,  $\text{CDCl}_3$ ):

614.14  
613.87

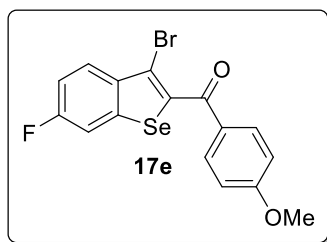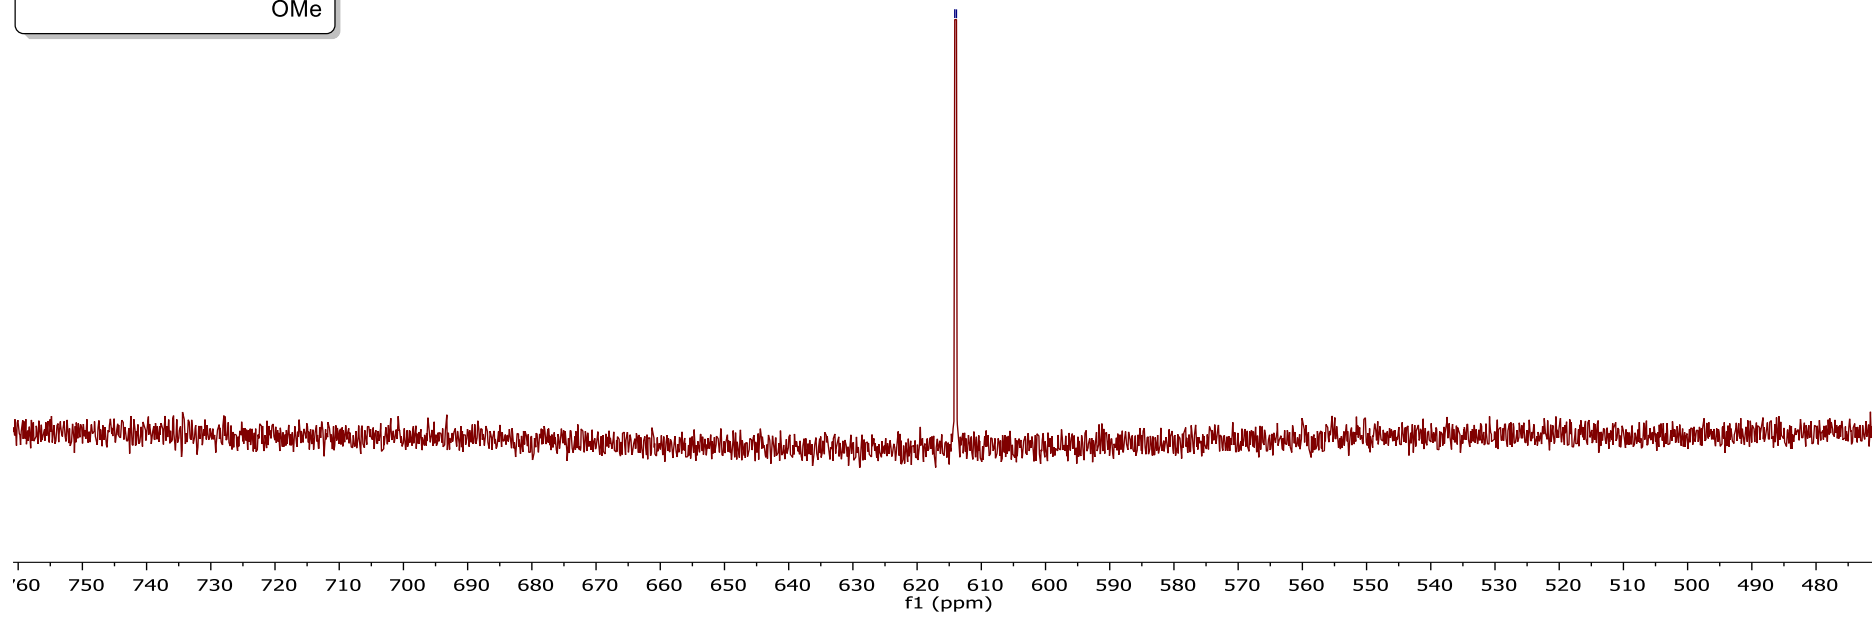

$^1\text{H}$  NMR (400 MHz,  $\text{CDCl}_3$ ):

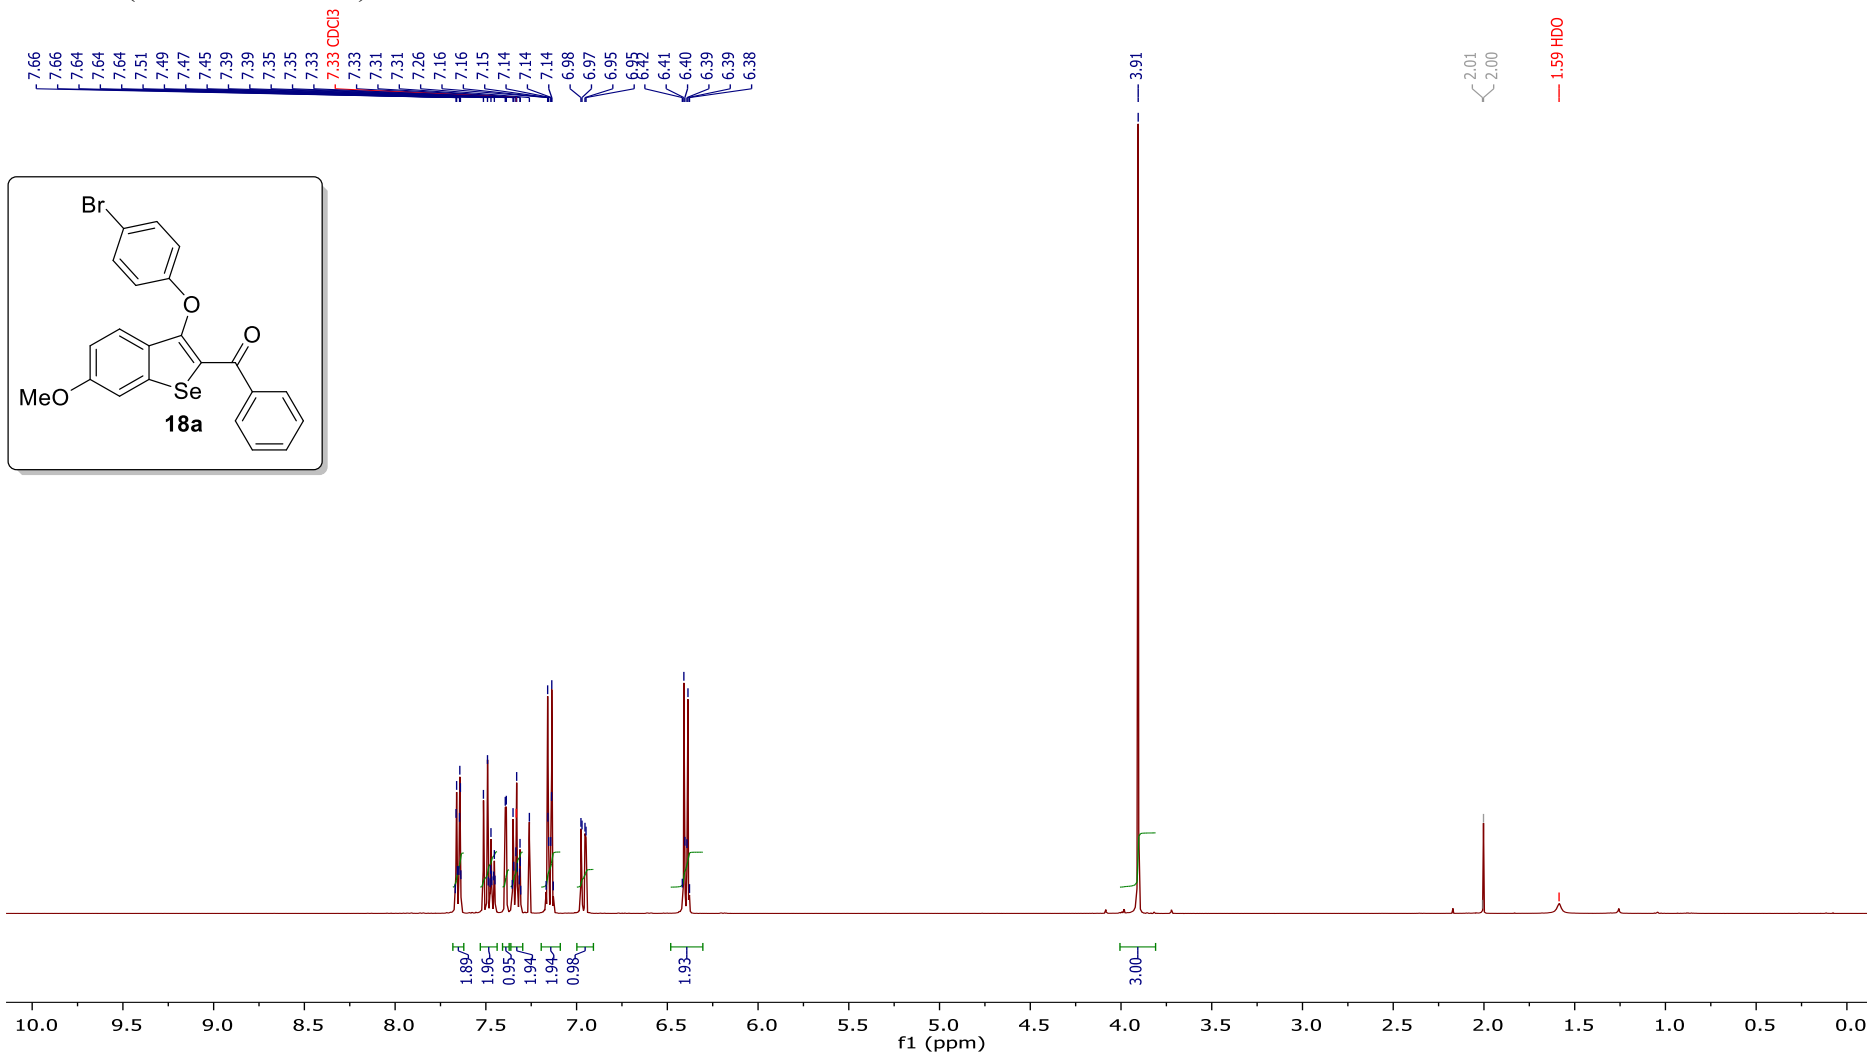

$^{13}\text{C}$  NMR (100.6 MHz,  $\text{CDCl}_3$ ):

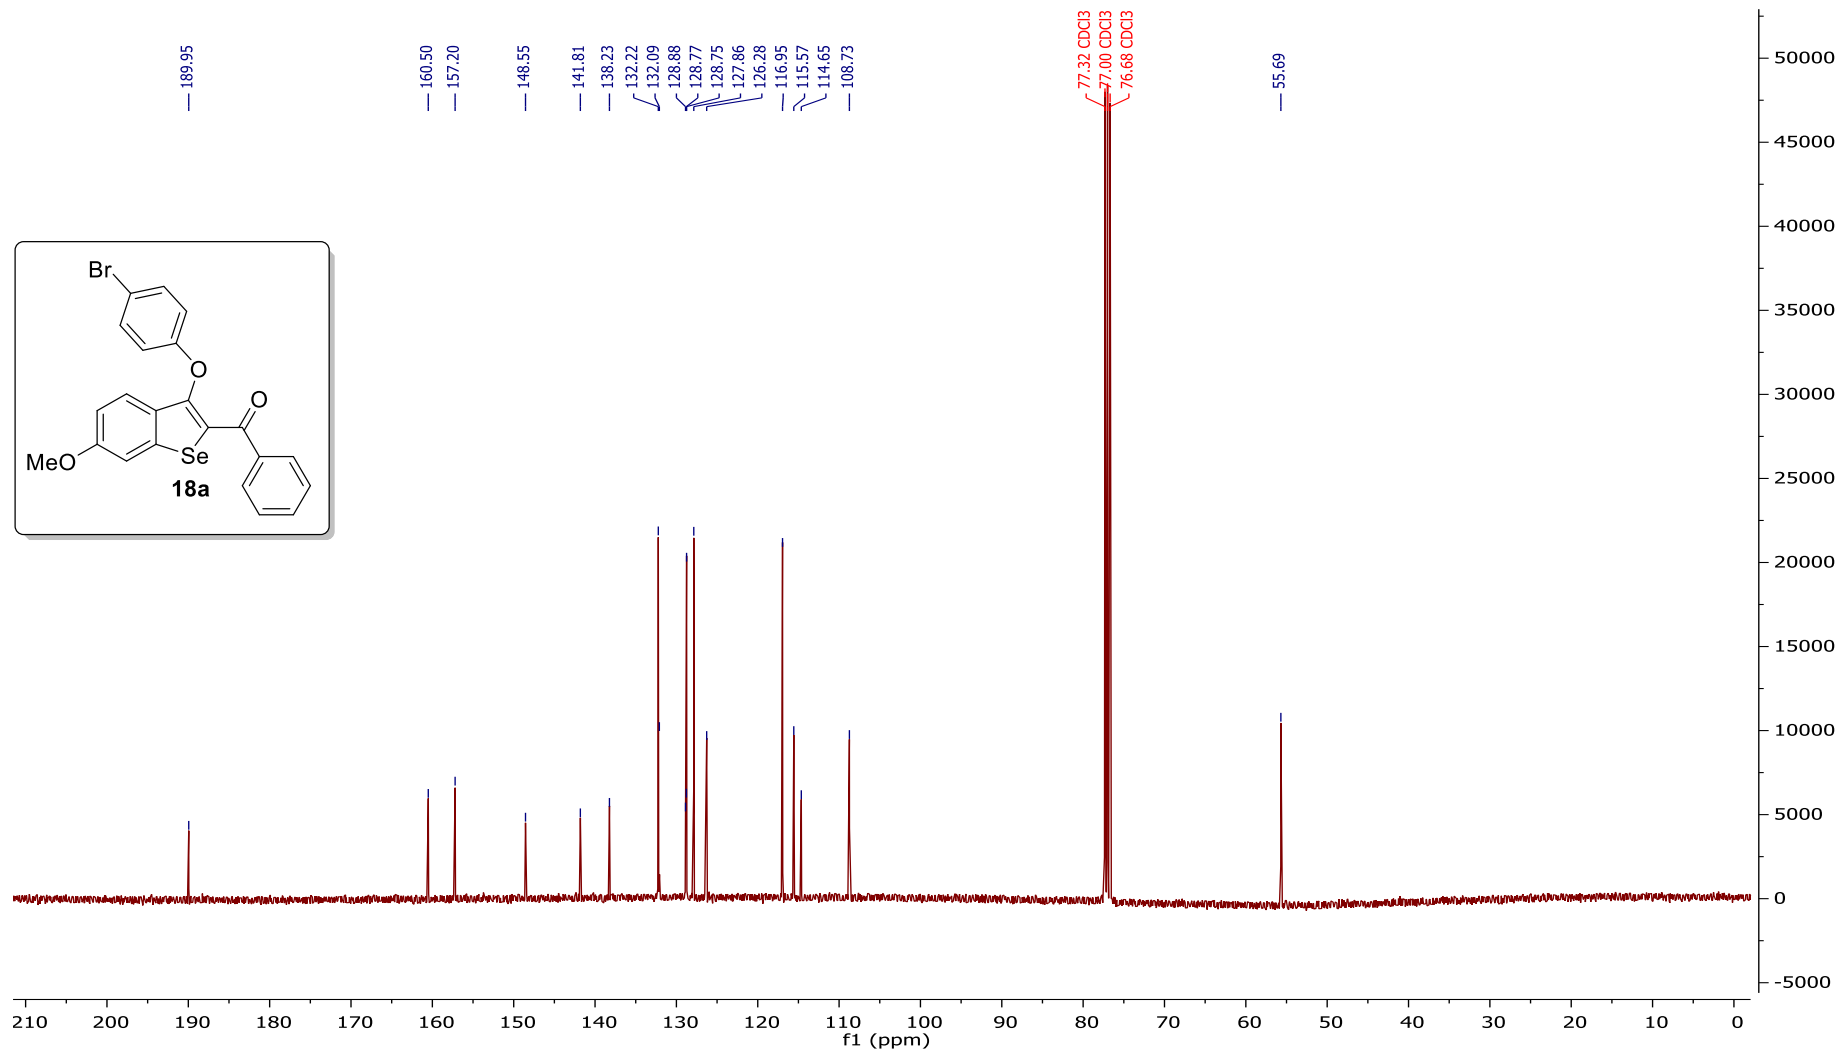



$^1\text{H}$  NMR (400 MHz,  $\text{CDCl}_3$ ):

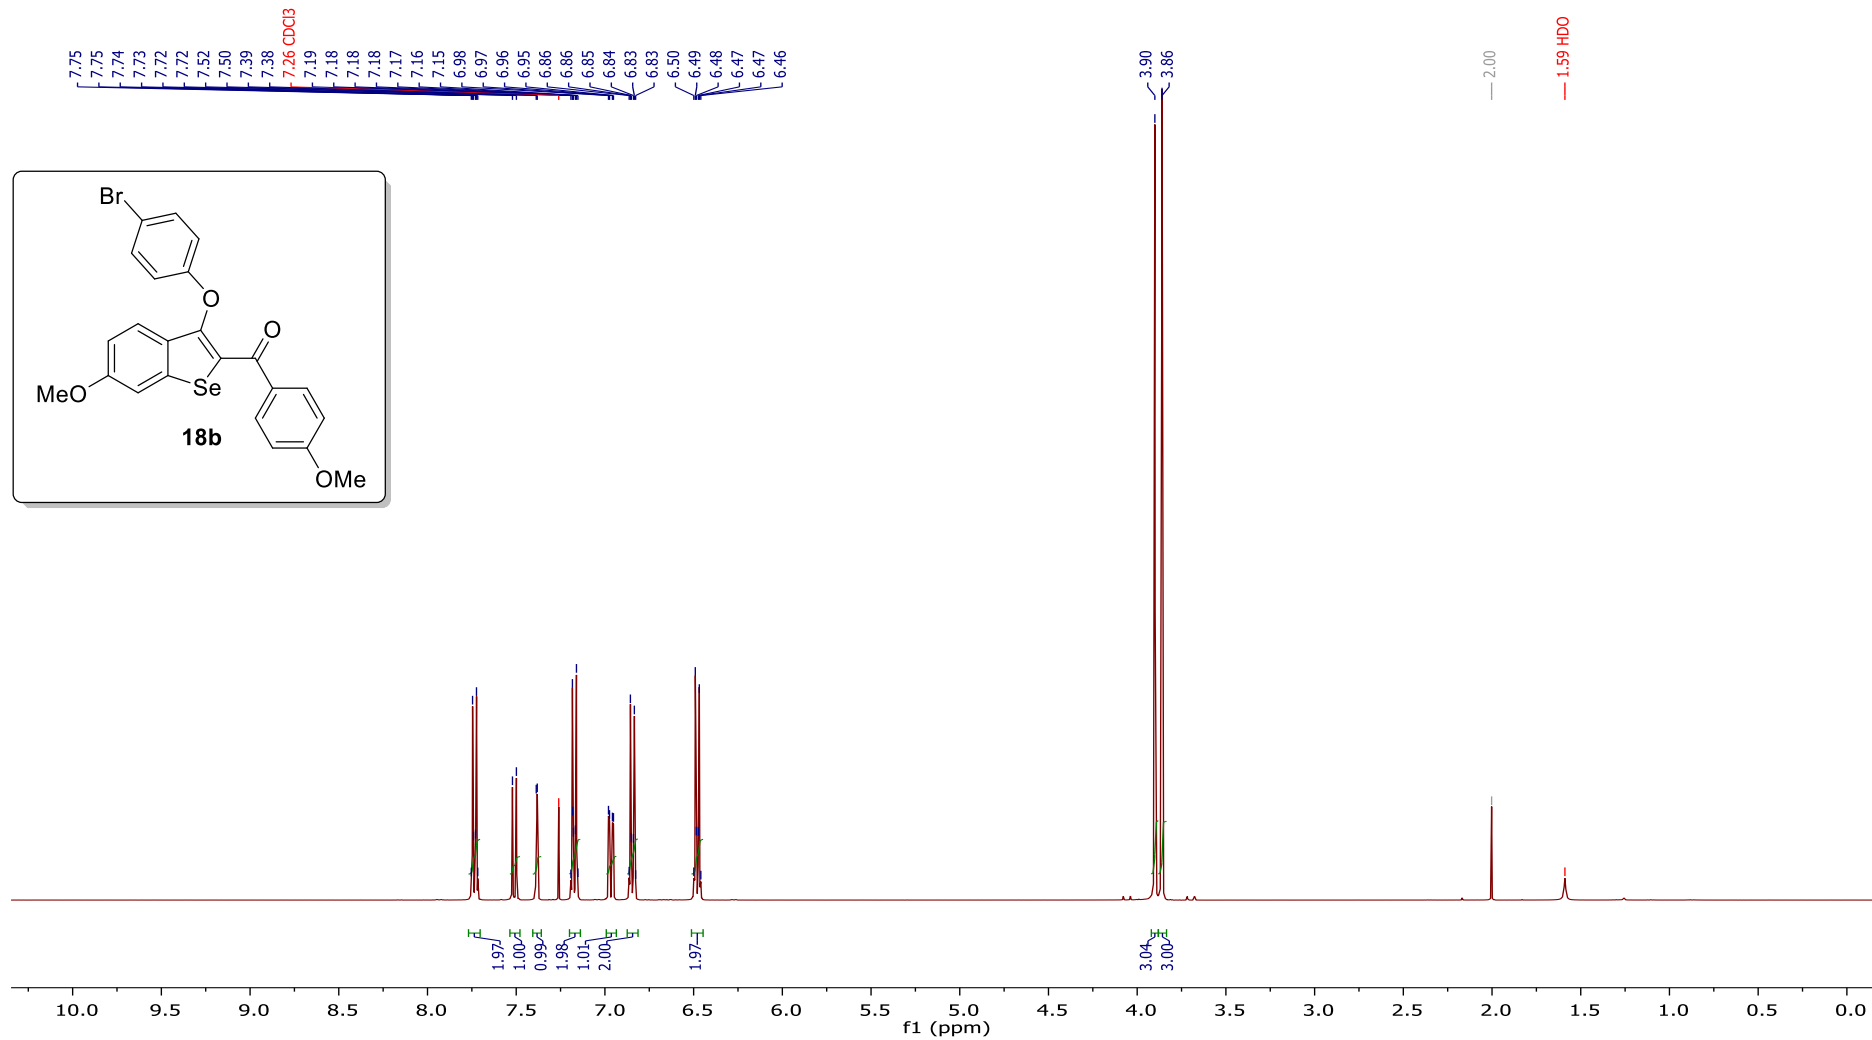

$^{13}\text{C}$  NMR (100.6 MHz,  $\text{CDCl}_3$ ):

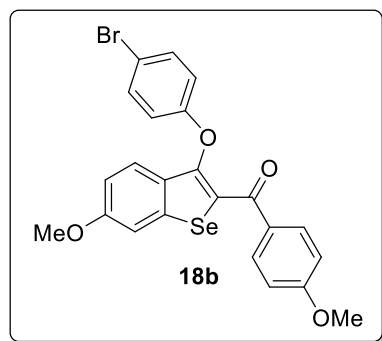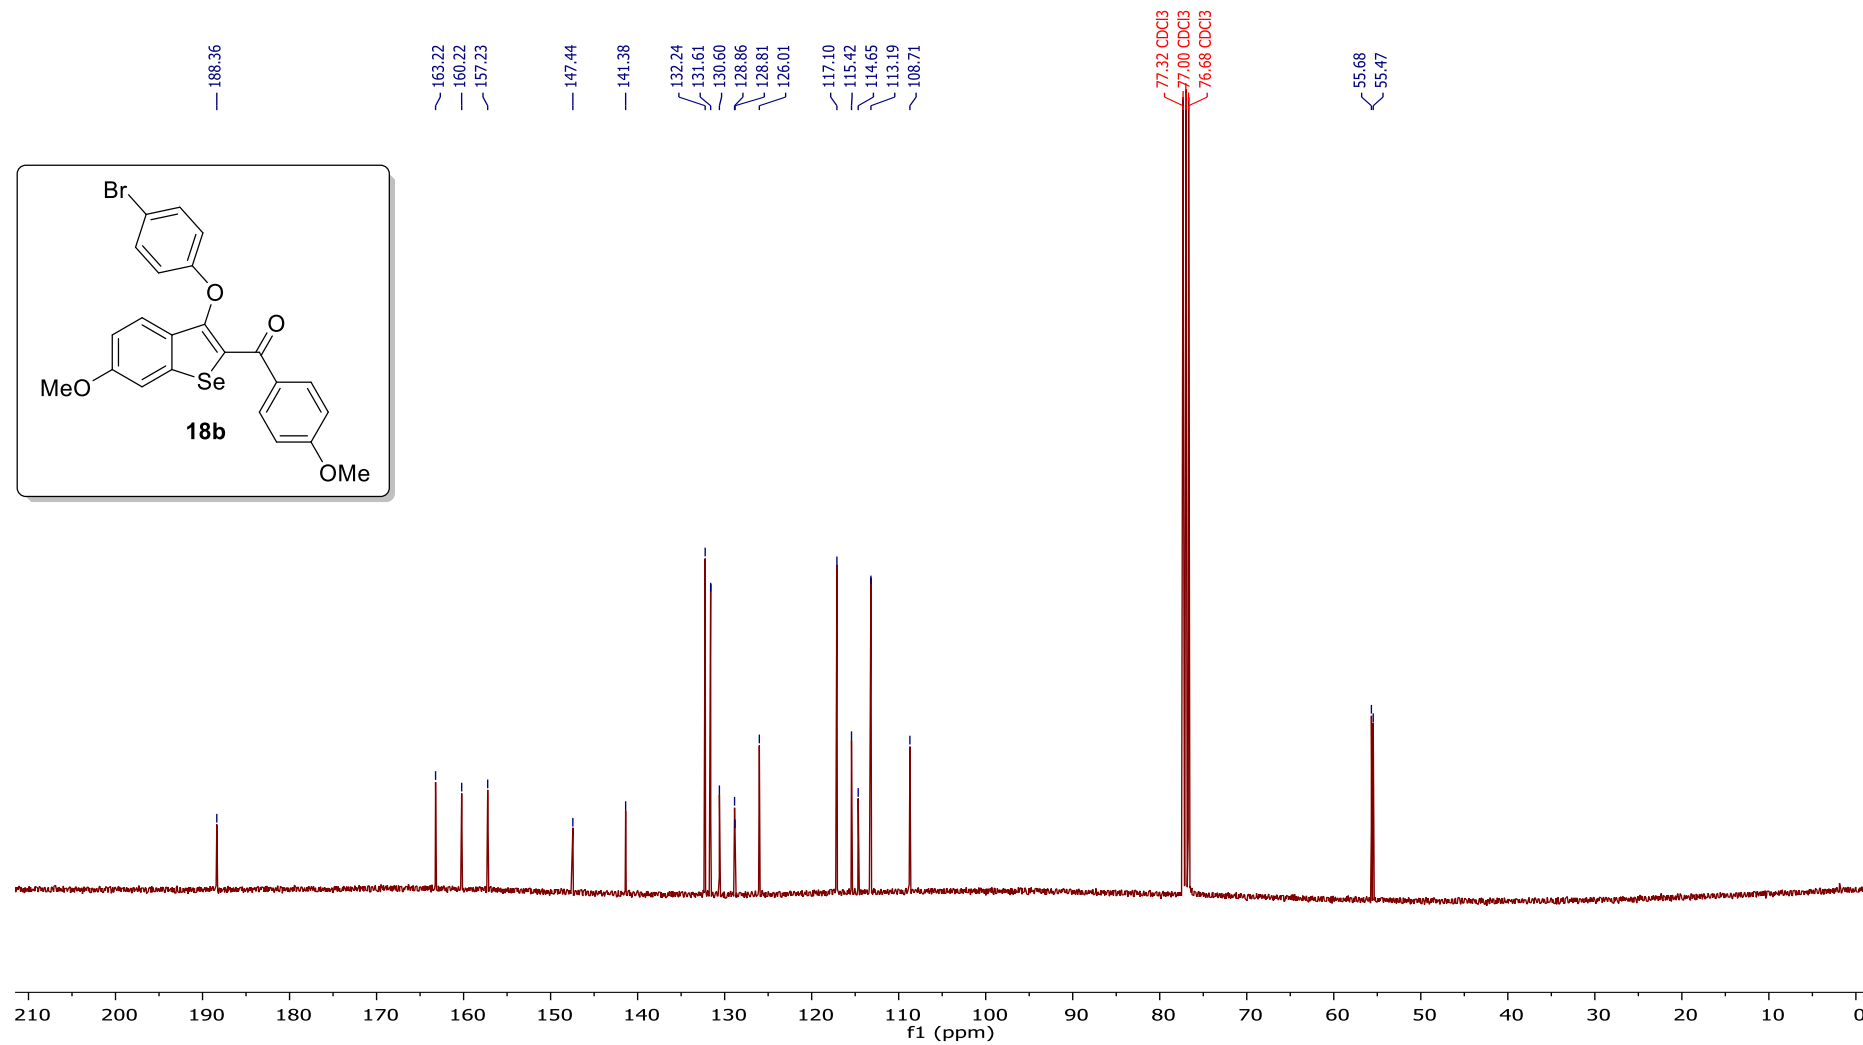

$^{77}\text{Se}$  NMR (76.37 MHz,  $\text{CDCl}_3$ ):

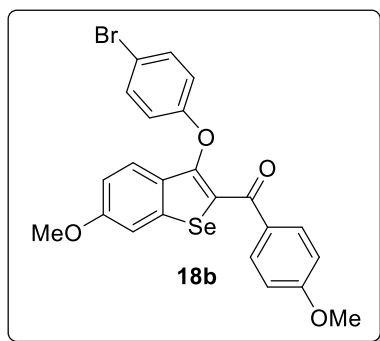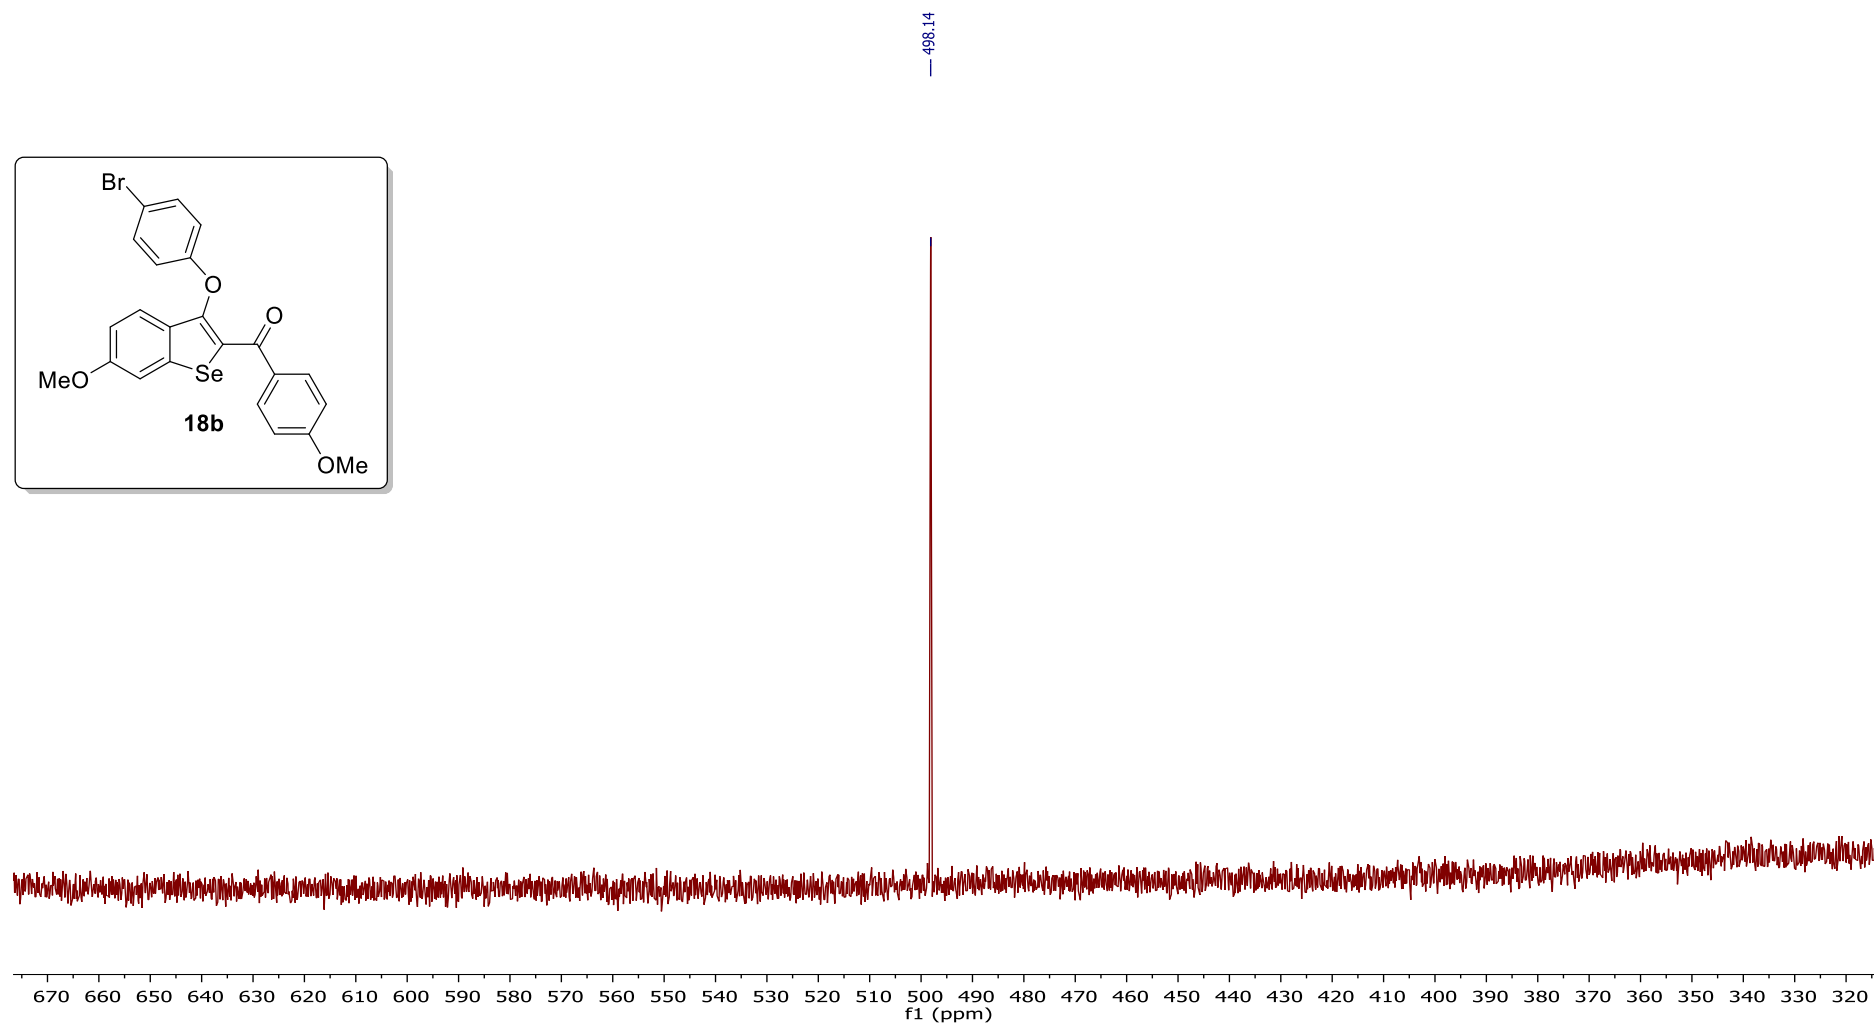

$^1\text{H}$  NMR (400 MHz,  $\text{CDCl}_3$ ):

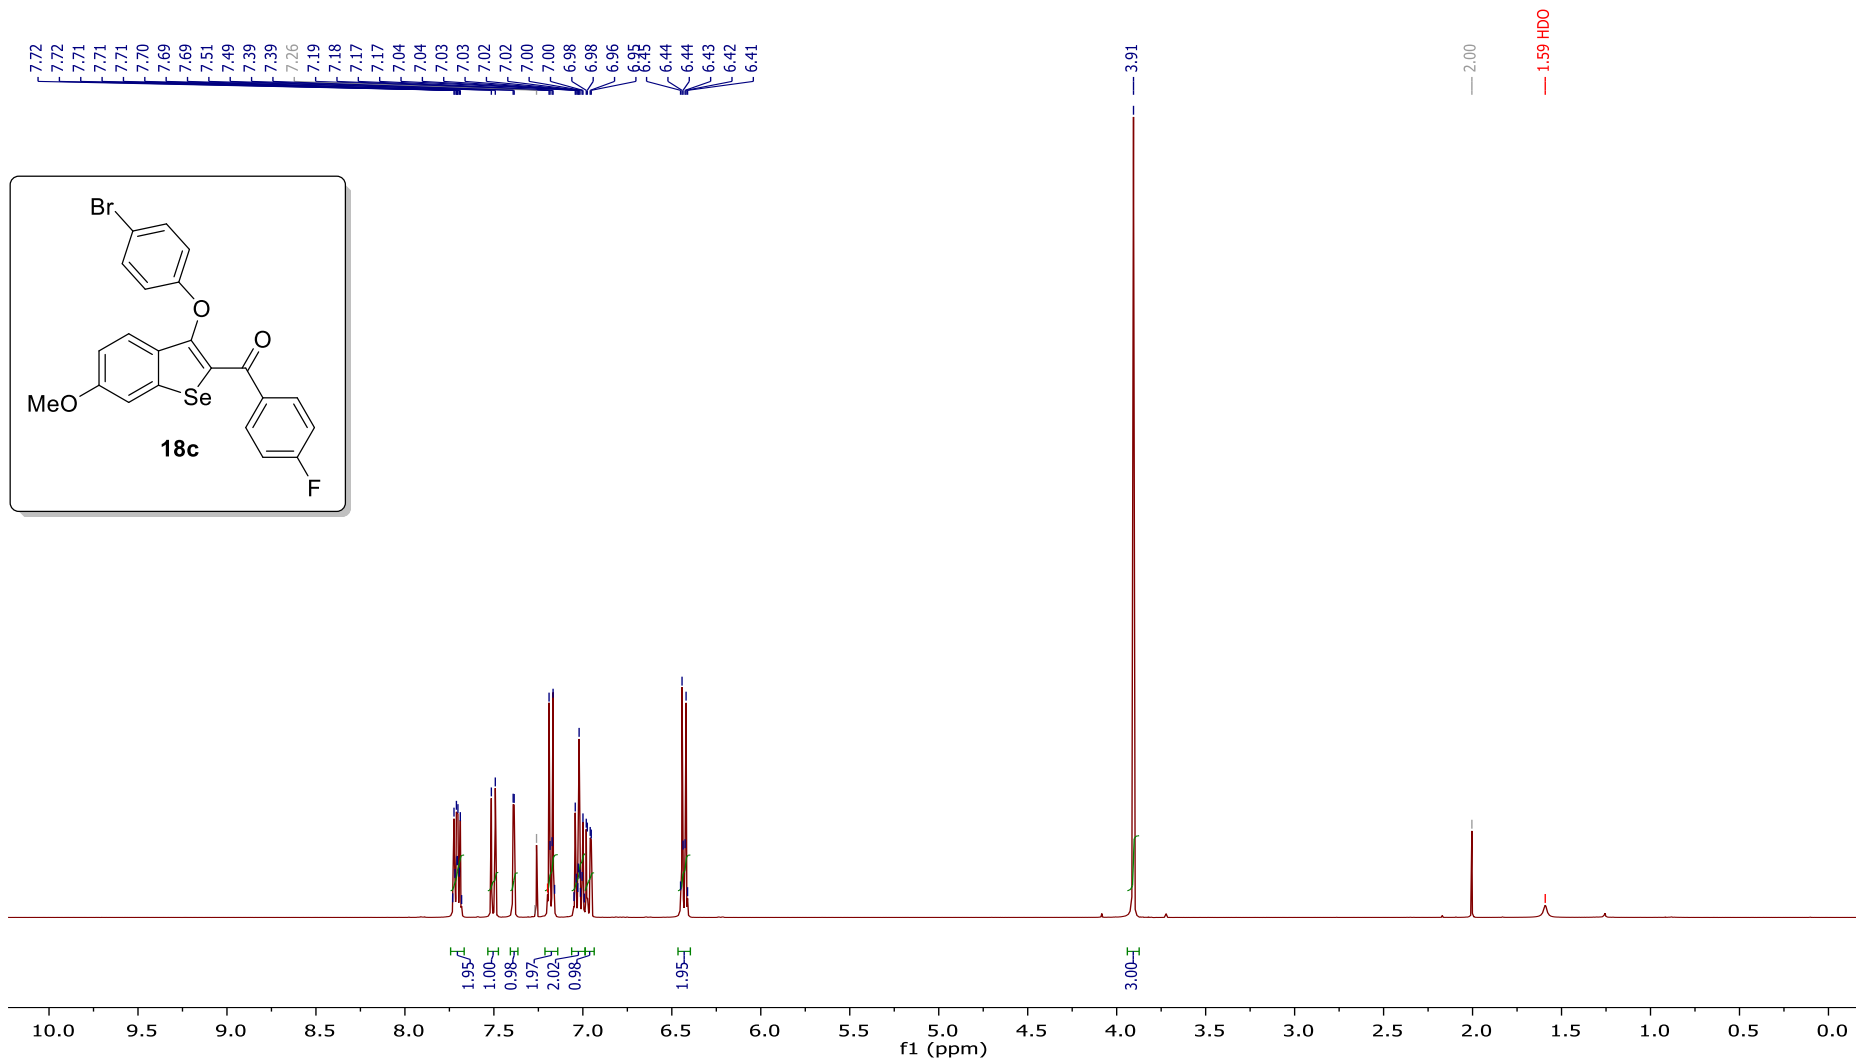

$^{13}\text{C}$  NMR (100.6 MHz,  $\text{CDCl}_3$ ):

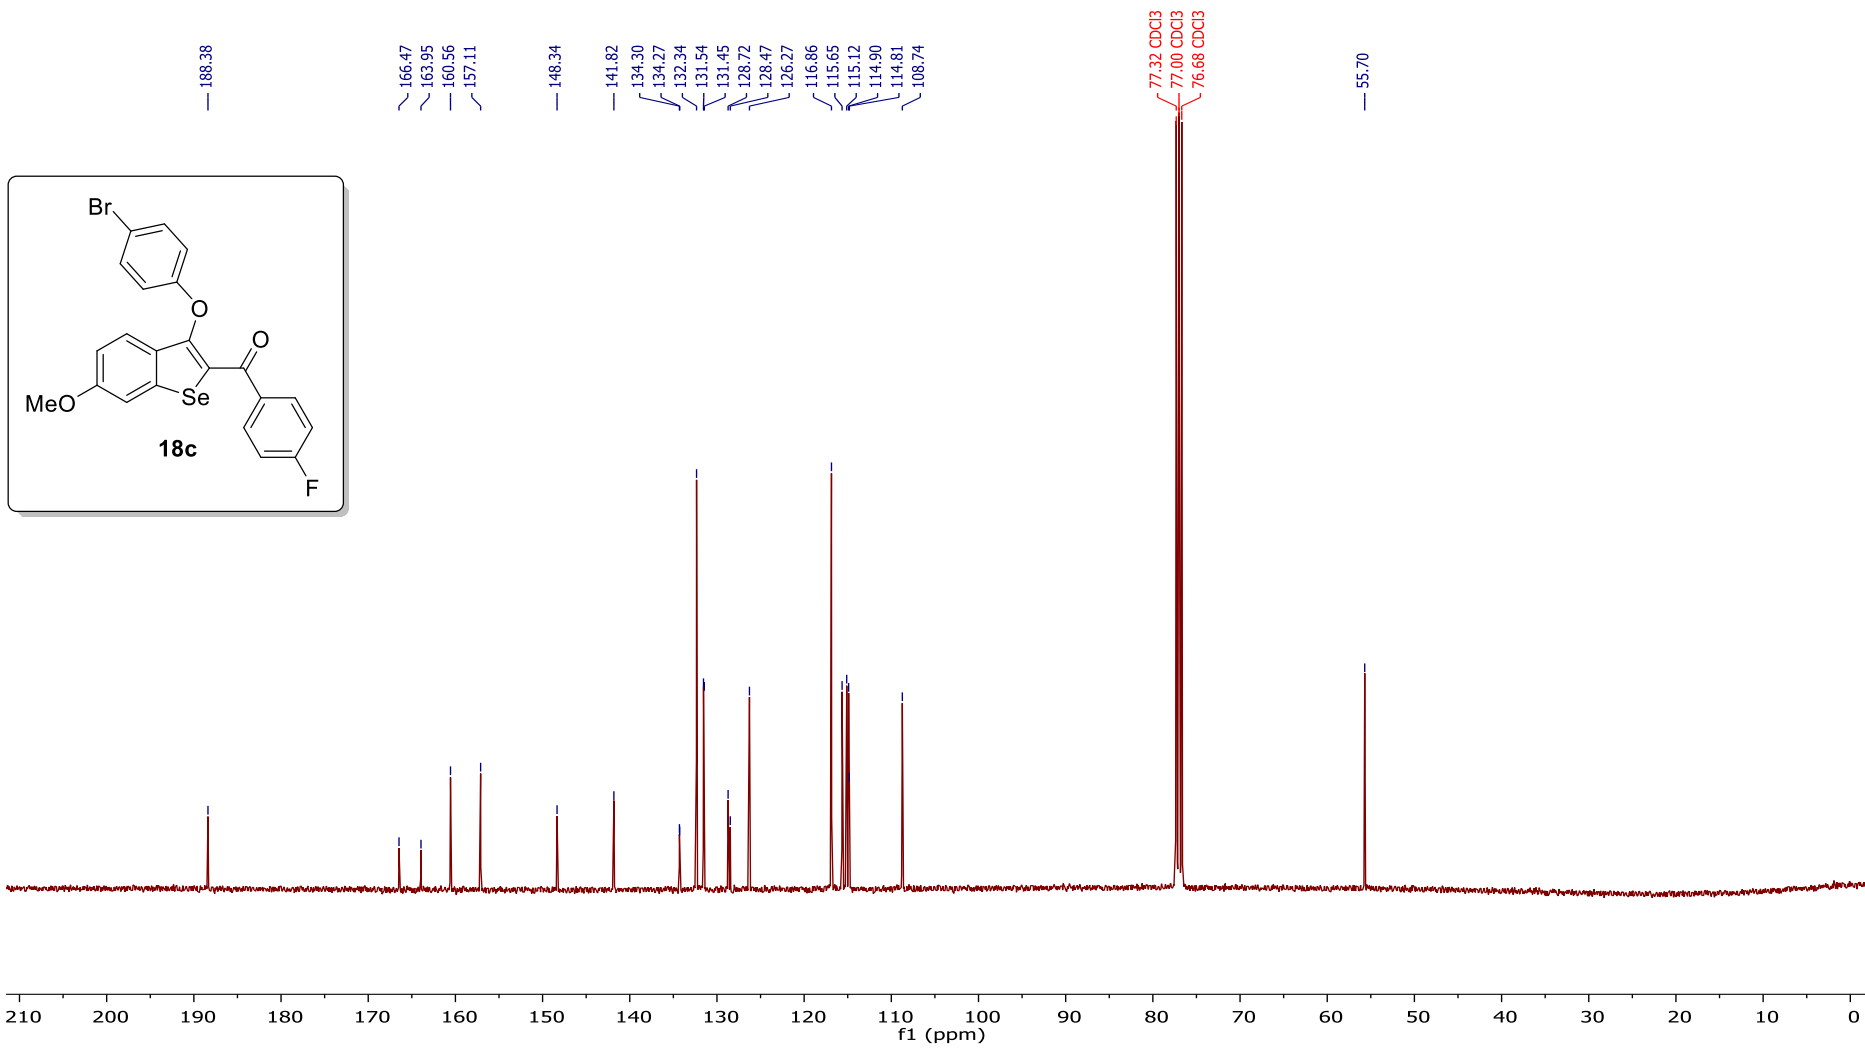

$^{19}\text{F}$  NMR (376.21 MHz,  $\text{CDCl}_3$ ):

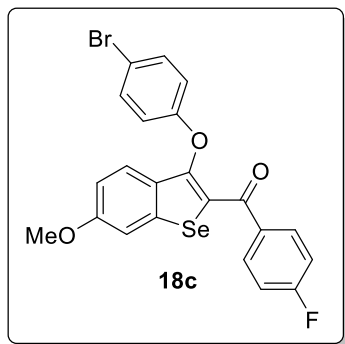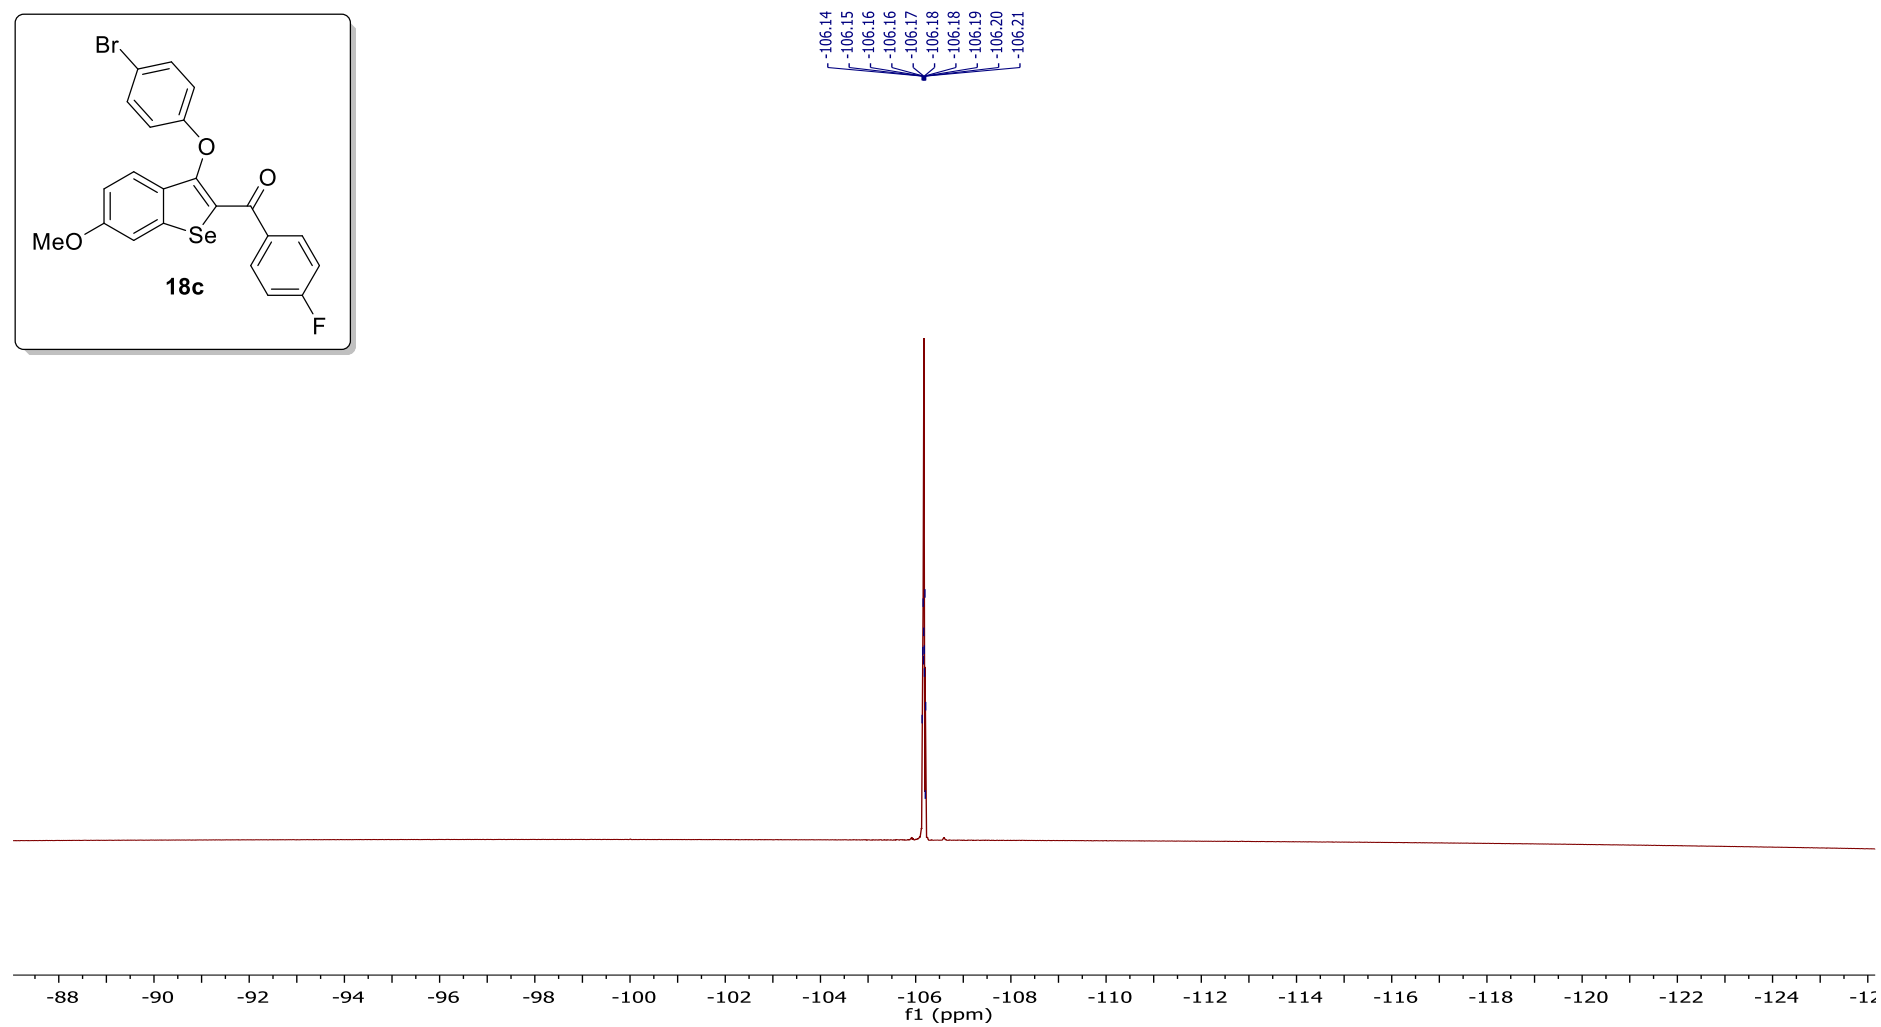

$^{77}\text{Se}$  NMR (76.37 MHz,  $\text{CDCl}_3$ ):

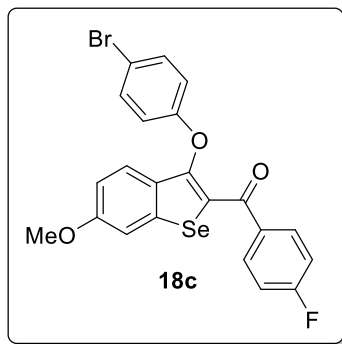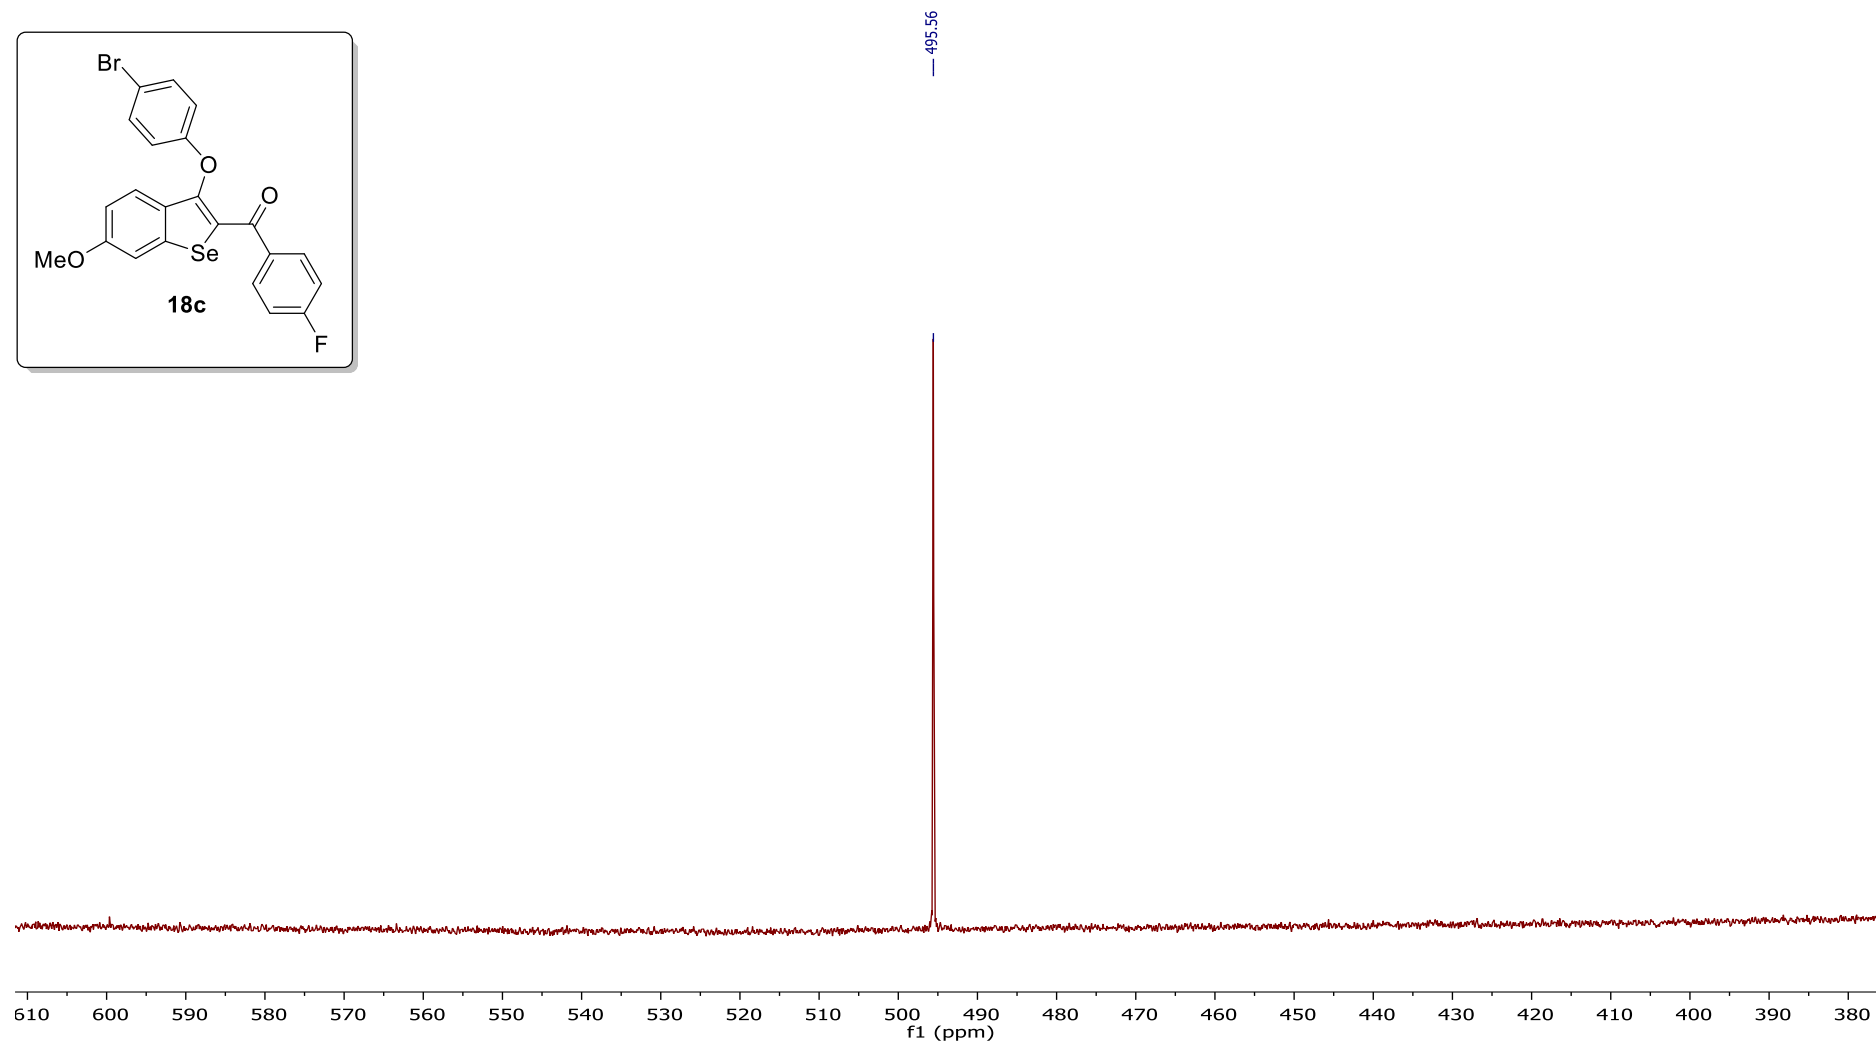

$^1\text{H}$  NMR (400 MHz,  $\text{CDCl}_3$ ):

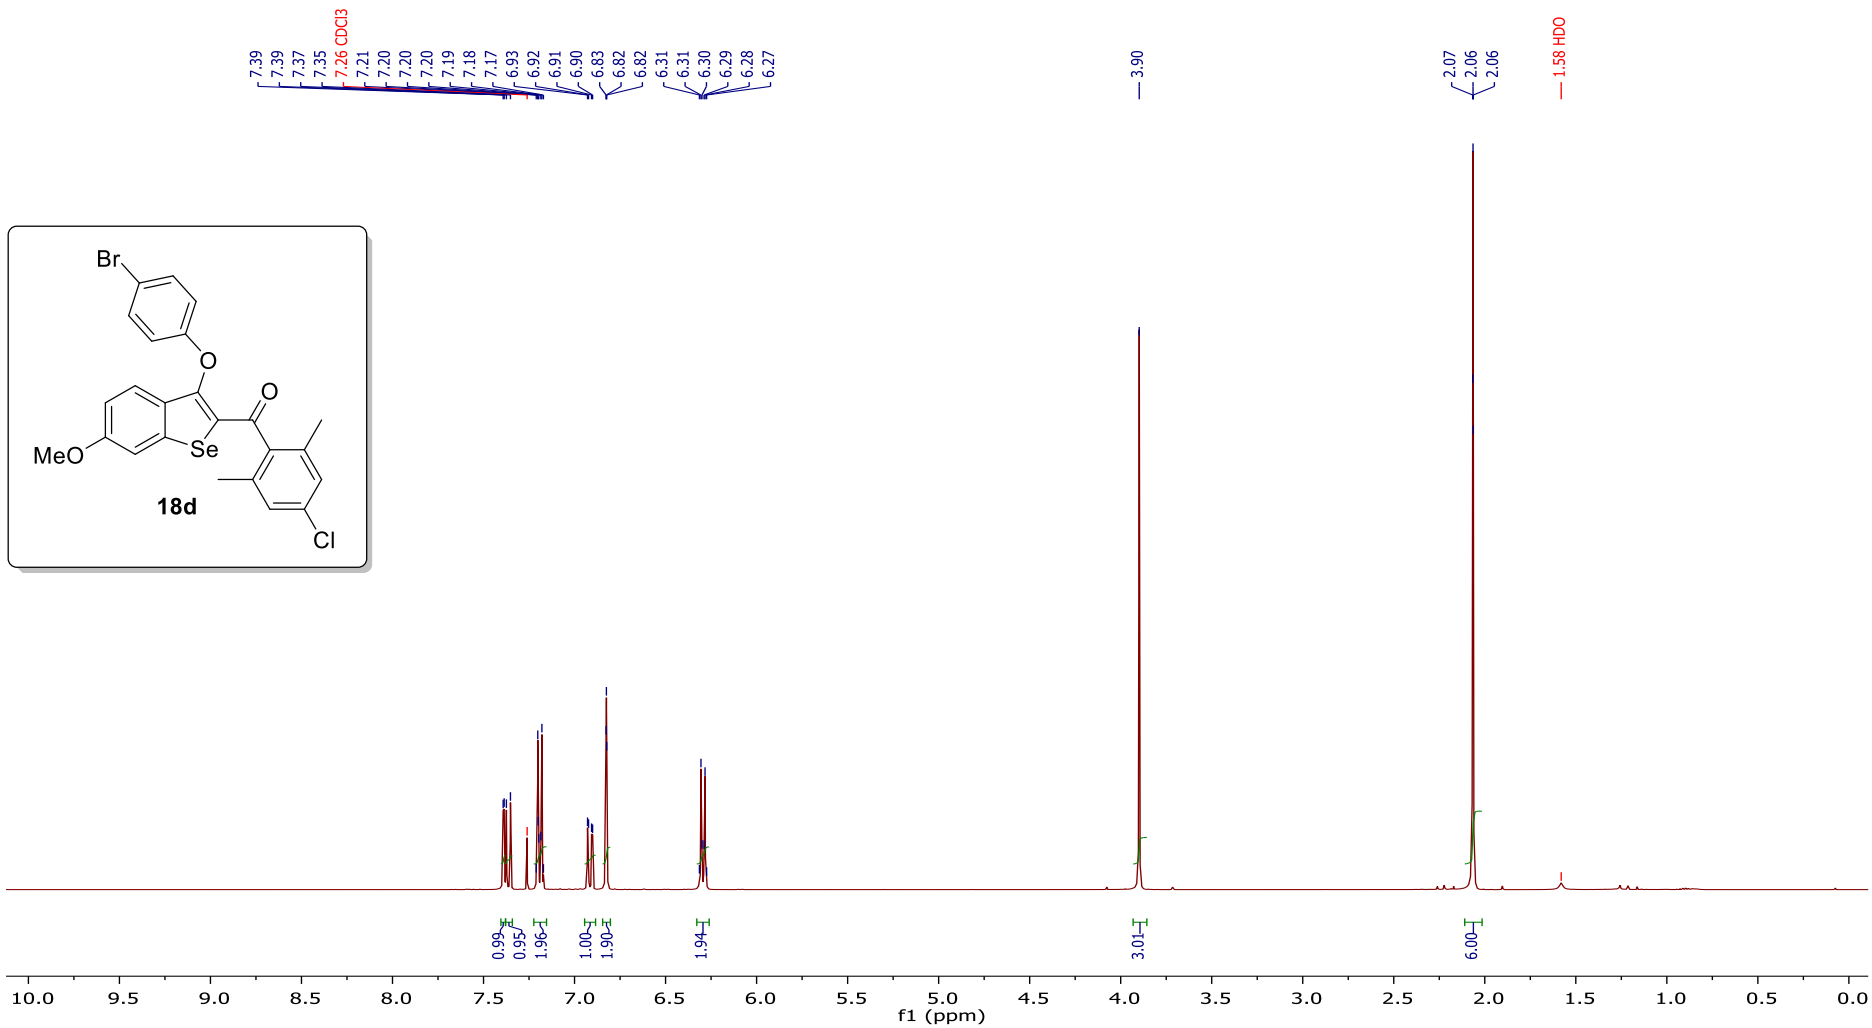



$^{13}\text{C}$  NMR (100.6 MHz,  $\text{CDCl}_3$ ):

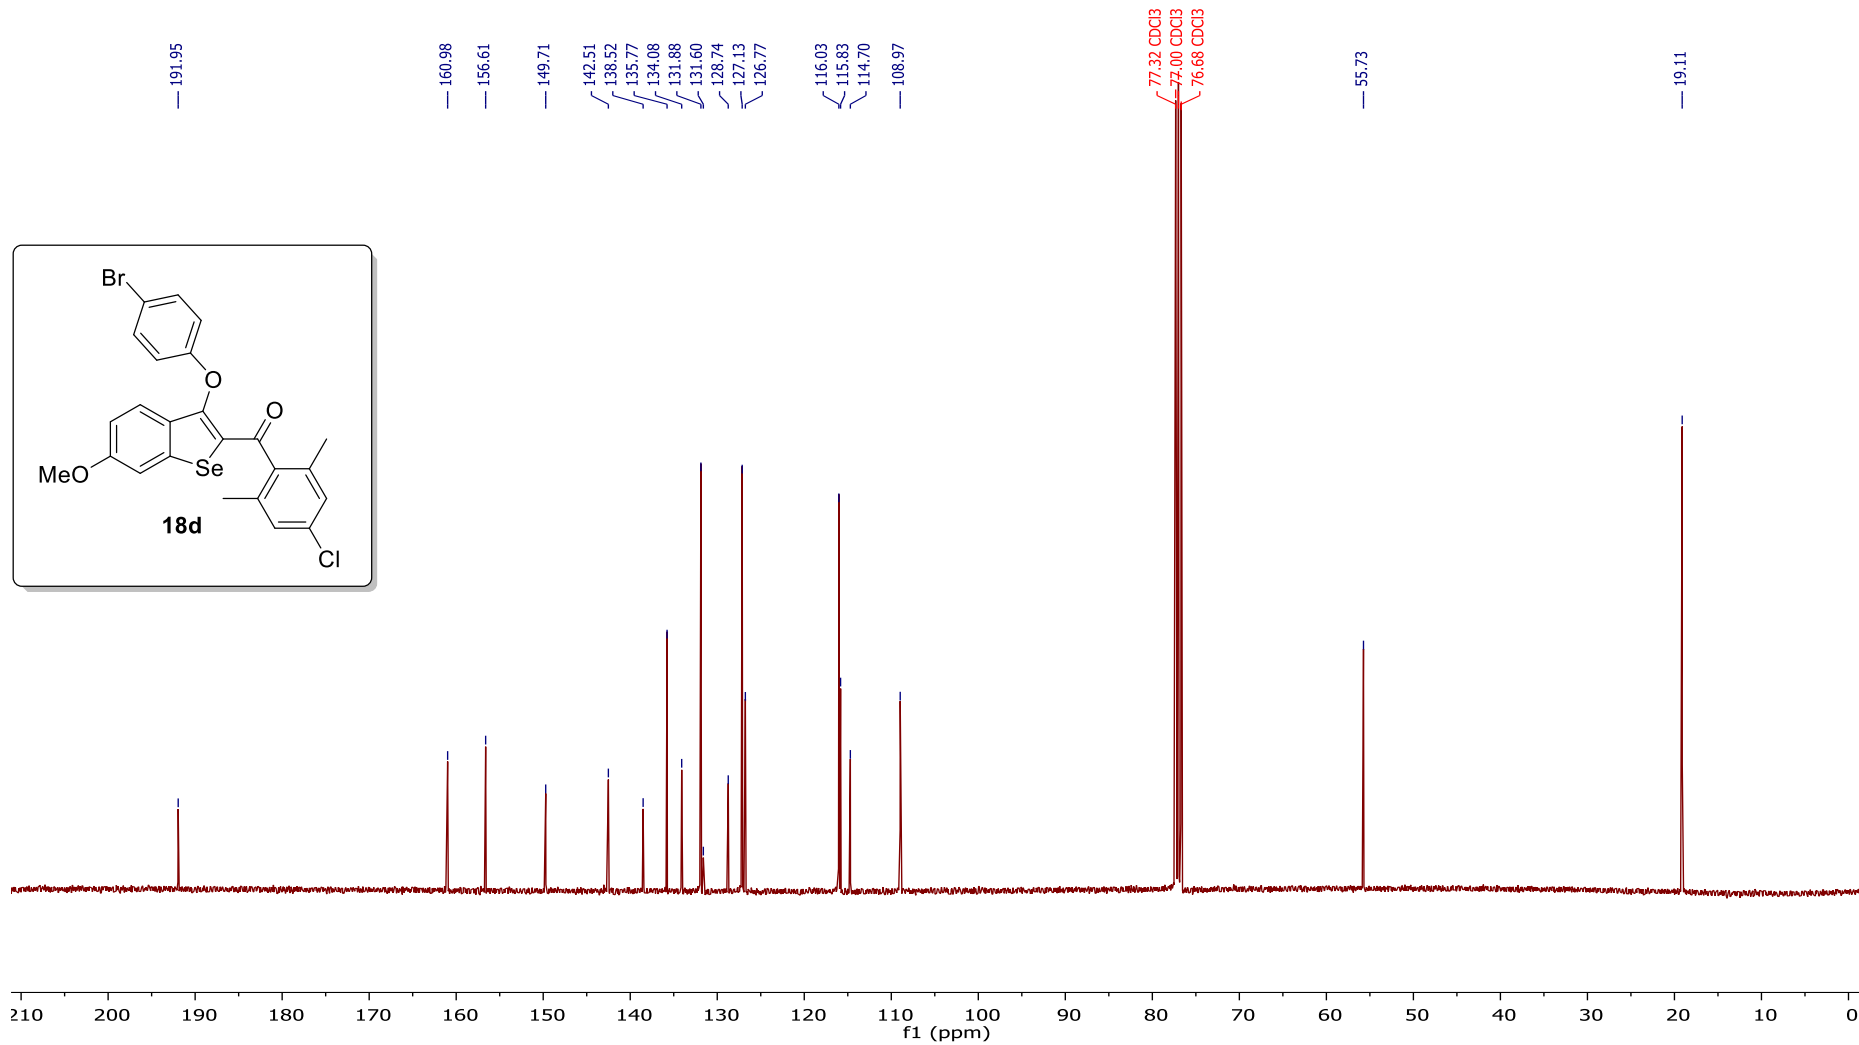

$^{77}\text{Se}$  NMR (76.37 MHz,  $\text{CDCl}_3$ ):

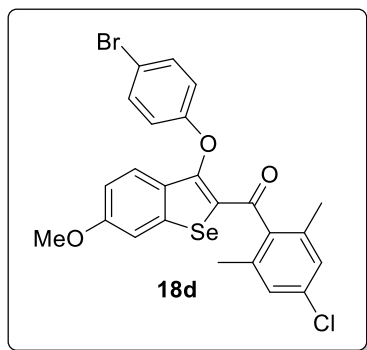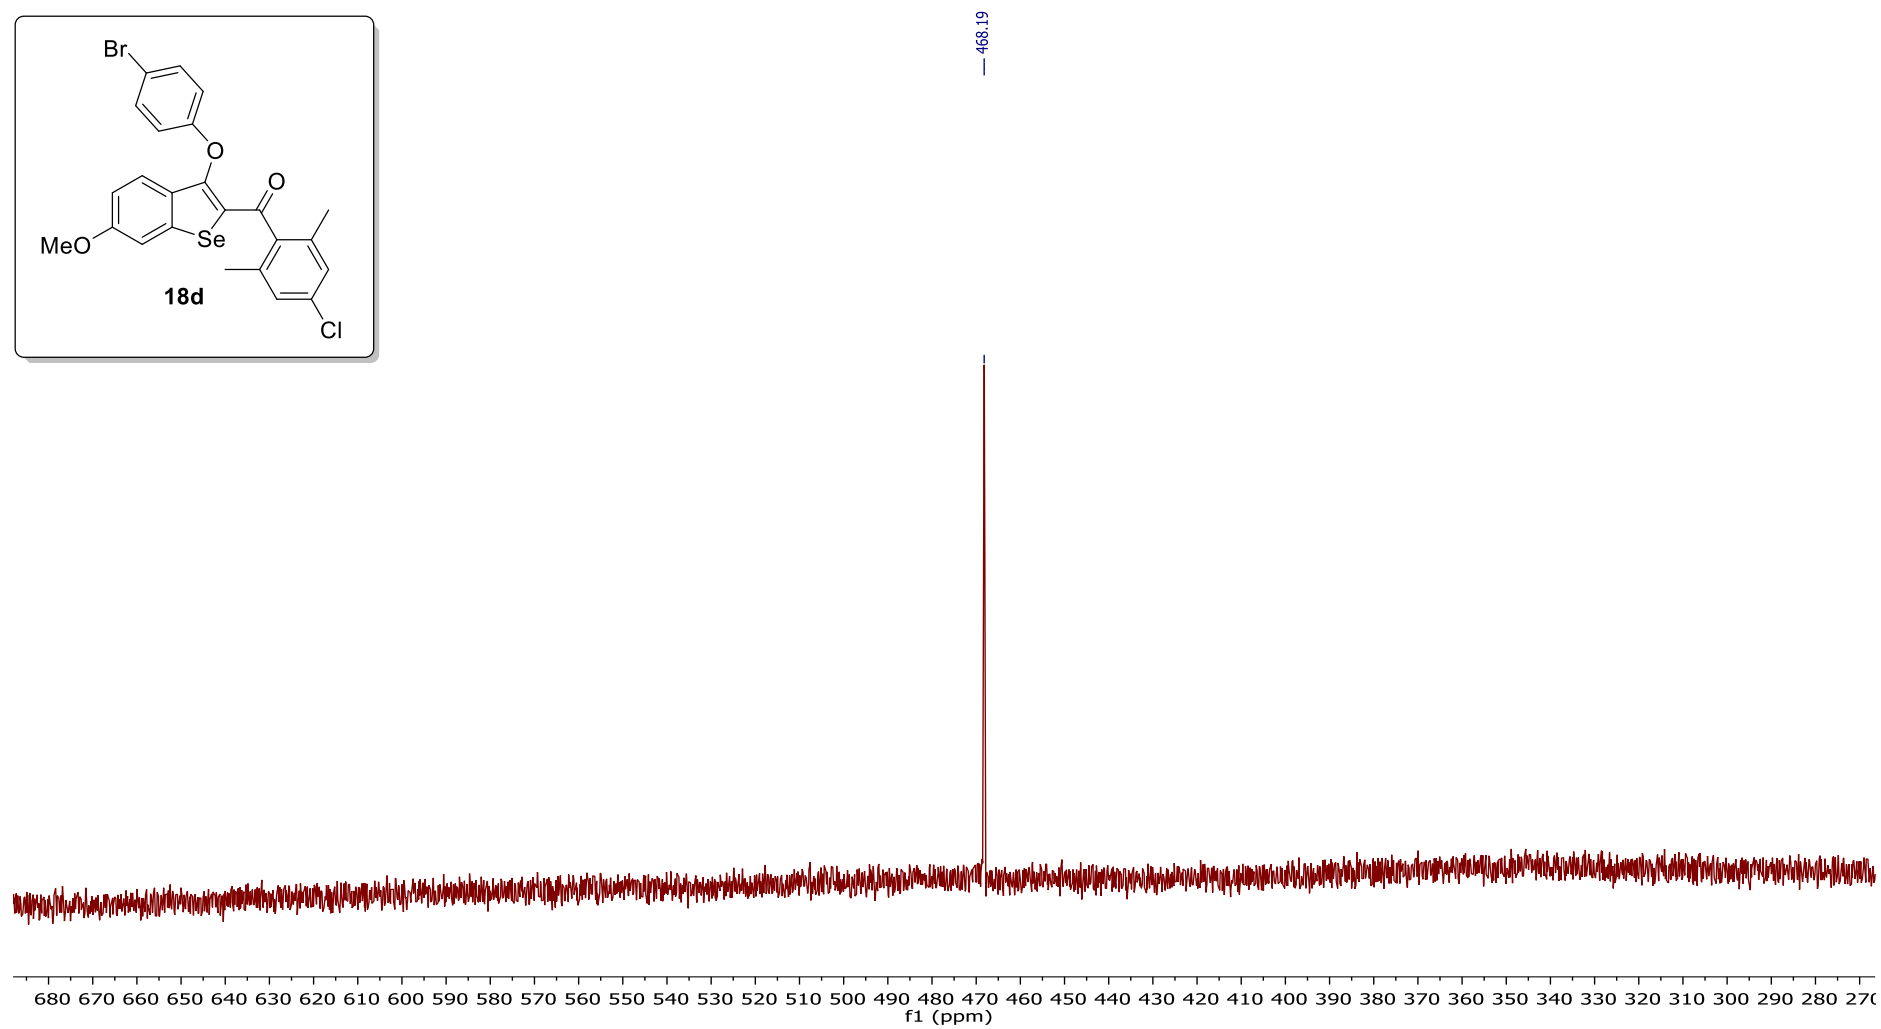

<sup>1</sup>H NMR (400 MHz, CDCl<sub>3</sub>):

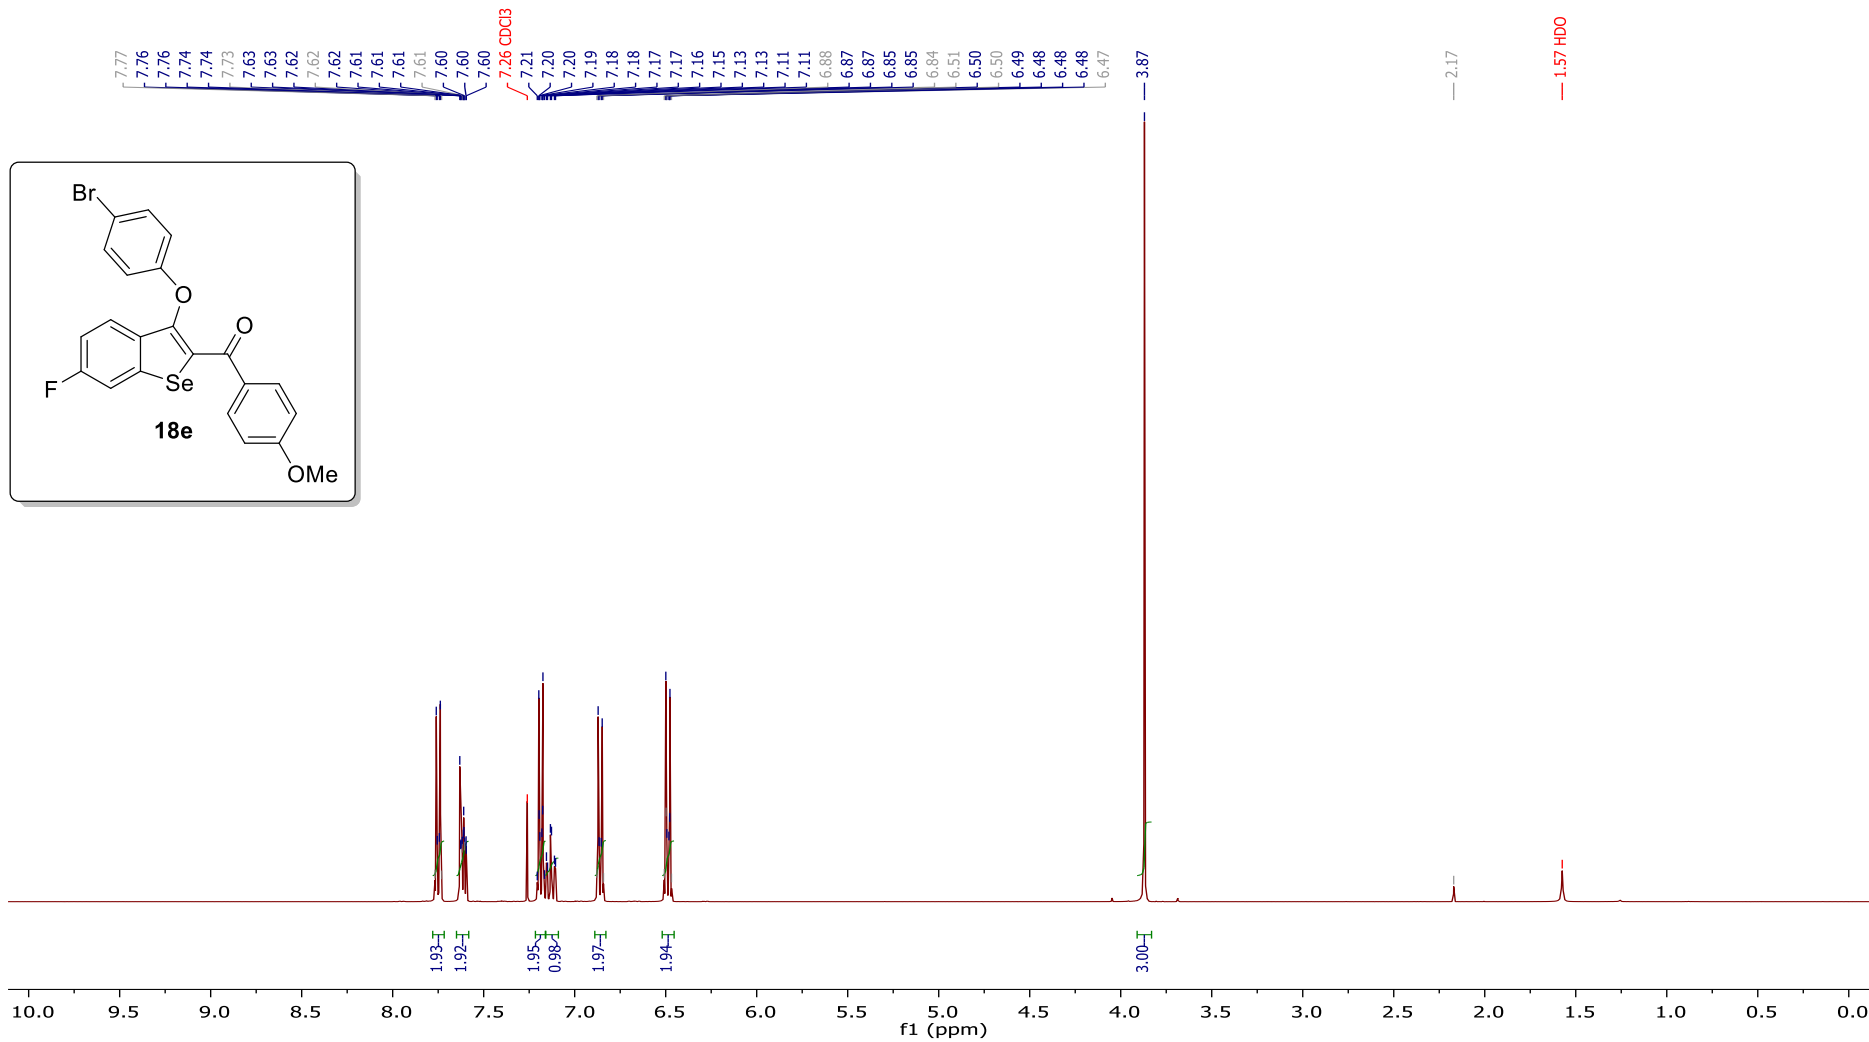

$^{13}\text{C}$  NMR (100.6 MHz,  $\text{CDCl}_3$ ):

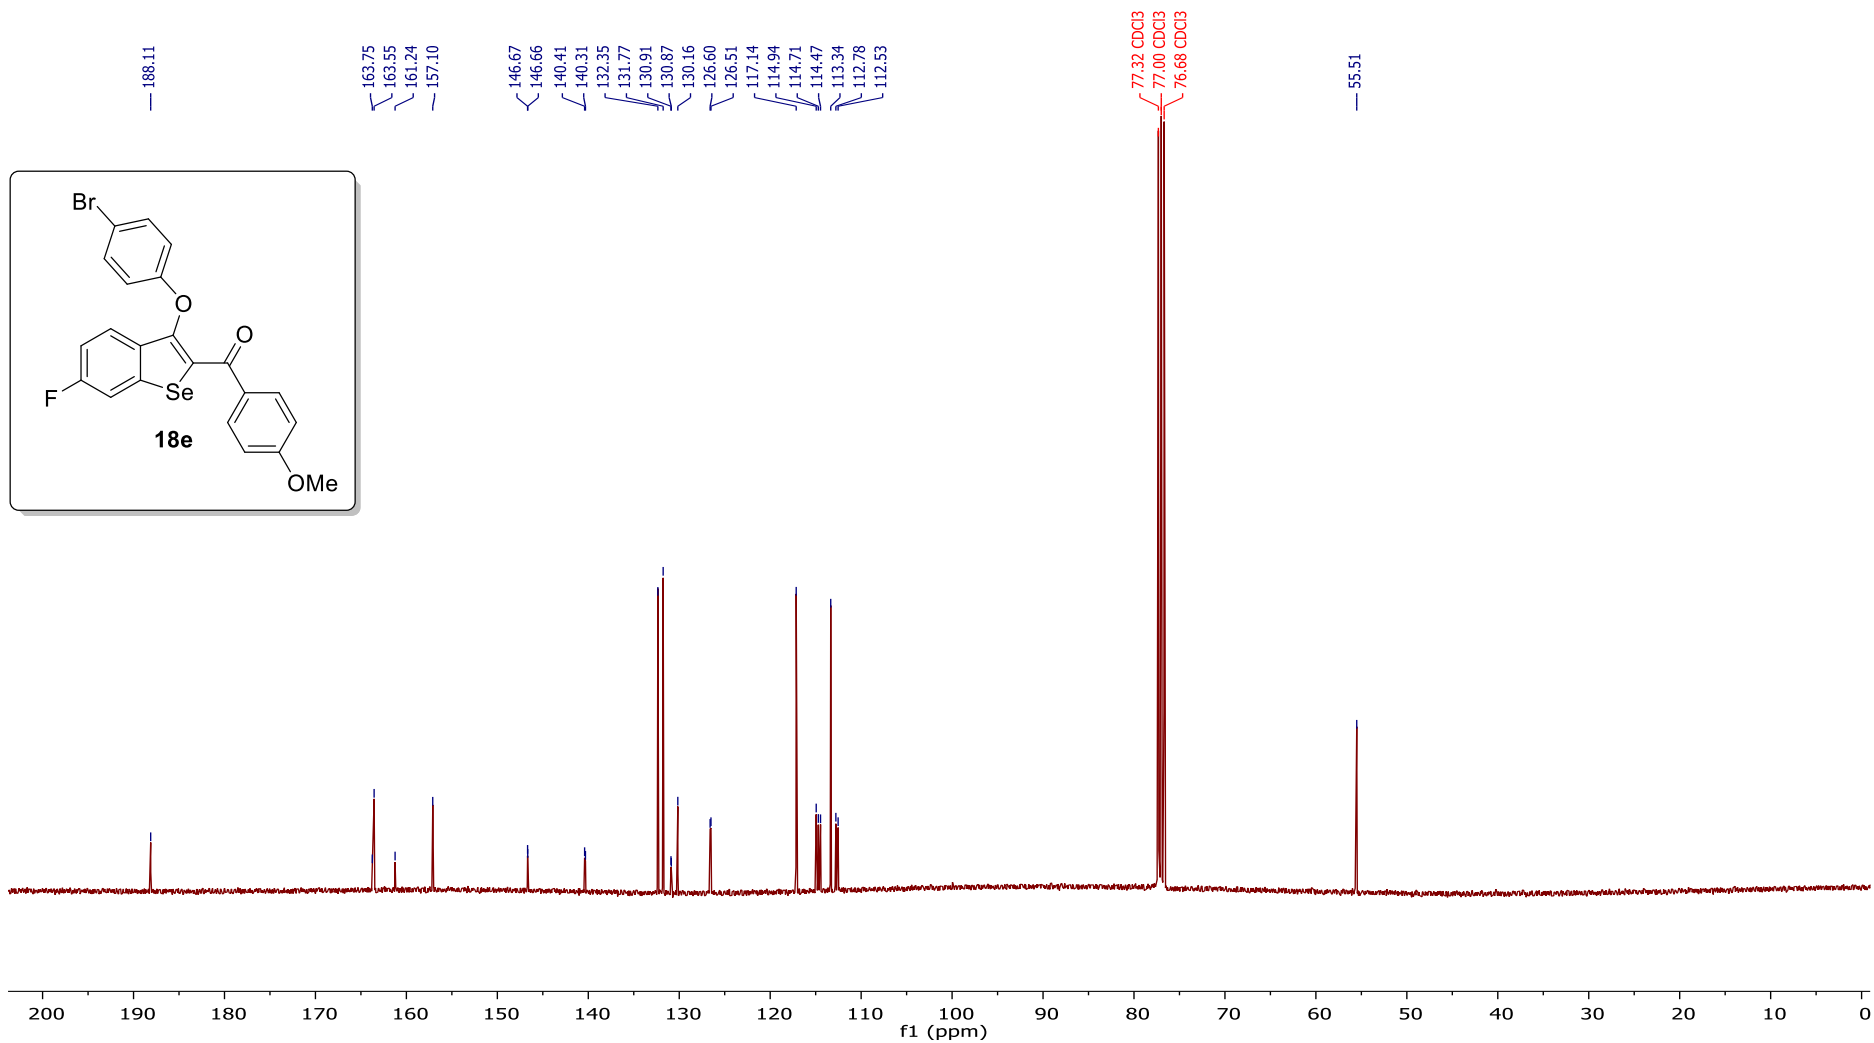

$^{19}\text{F}$  NMR (376.21 MHz,  $\text{CDCl}_3$ ):

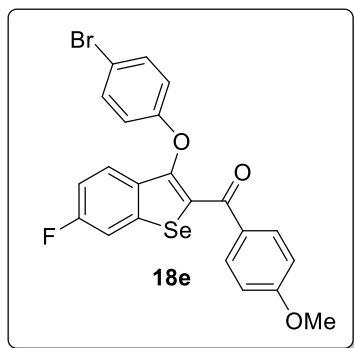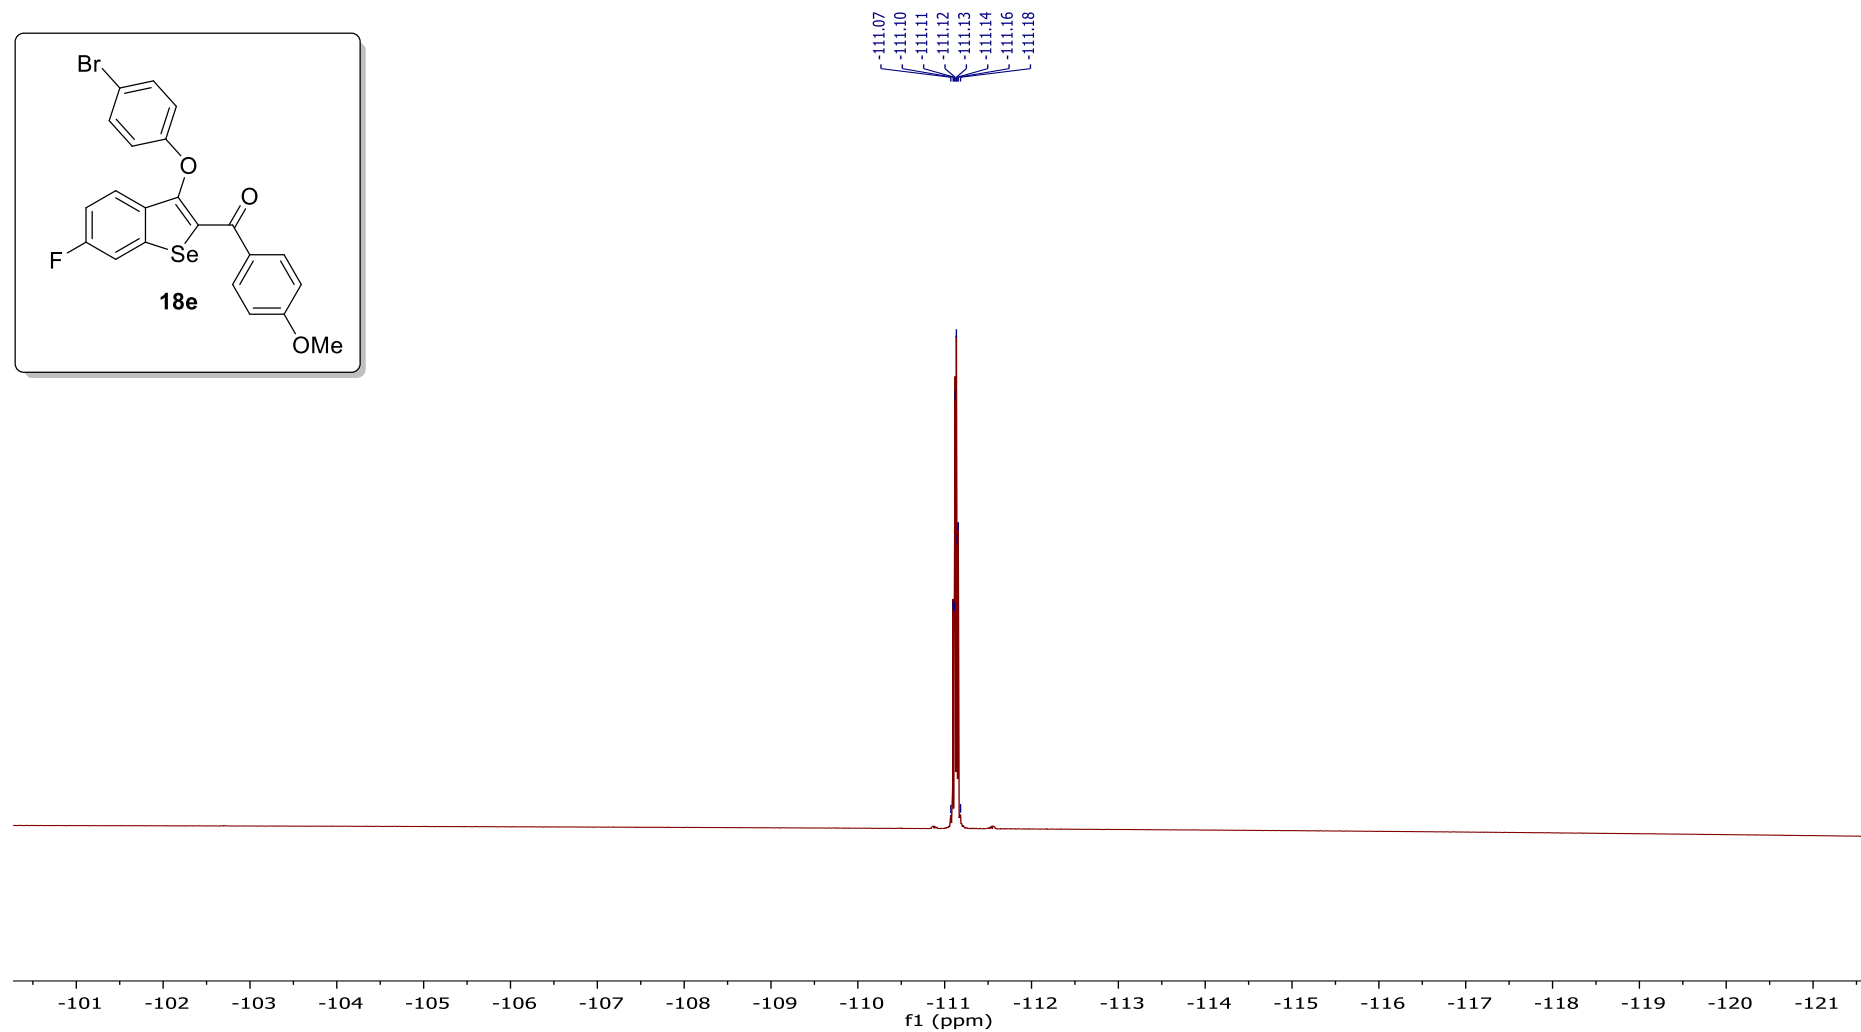

$^{77}\text{Se}$  NMR (76.37 MHz,  $\text{CDCl}_3$ ):

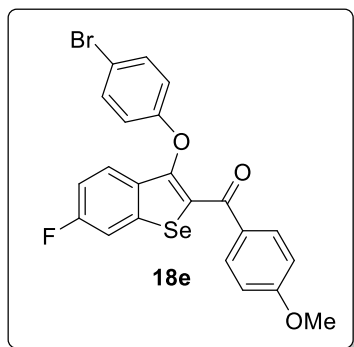

510.21  
509.95

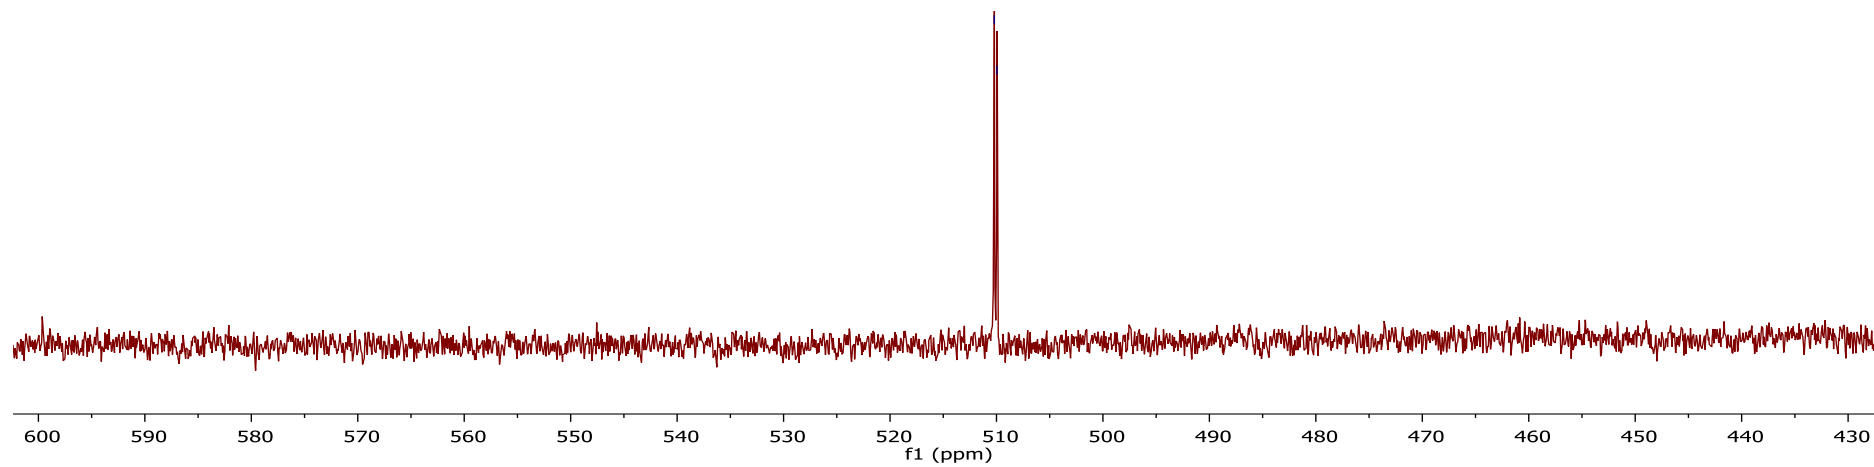

<sup>1</sup>H NMR (400 MHz, DMSO-d<sub>6</sub>):

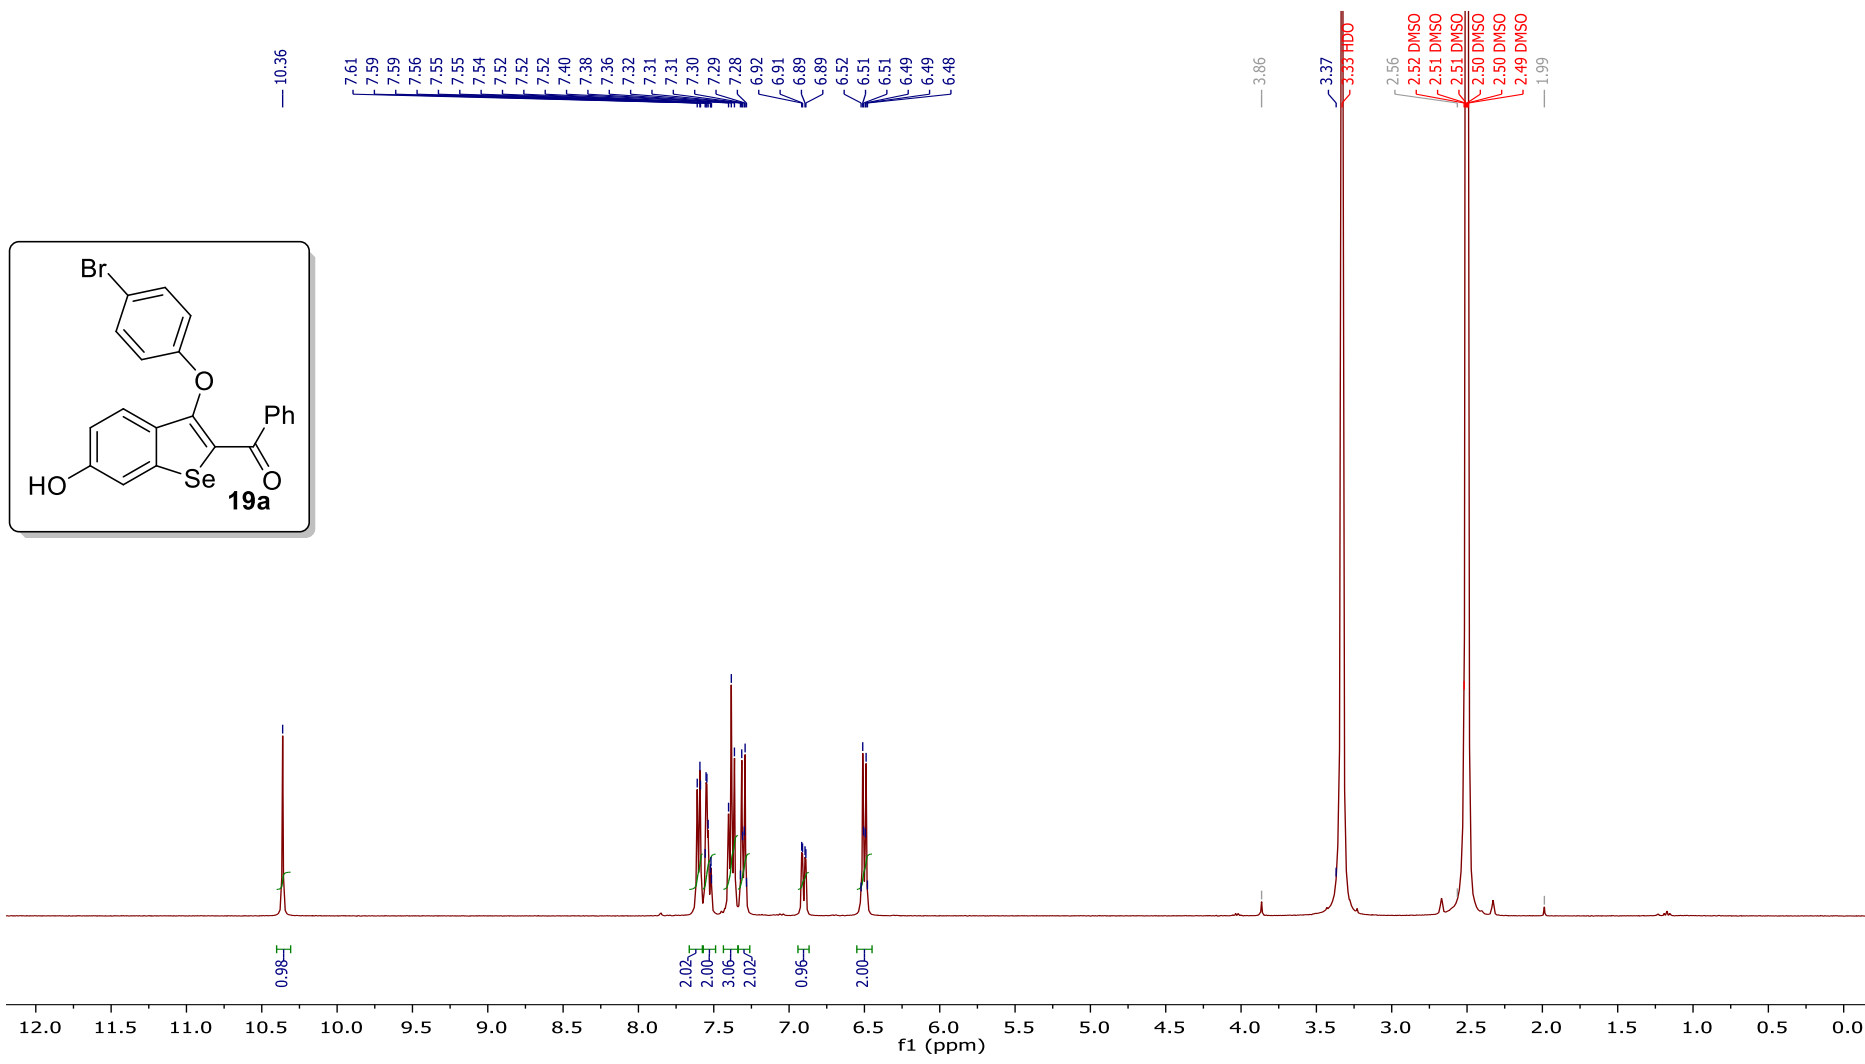

$^{13}\text{C}$  NMR (100.6 MHz, DMSO- $d_6$ ):

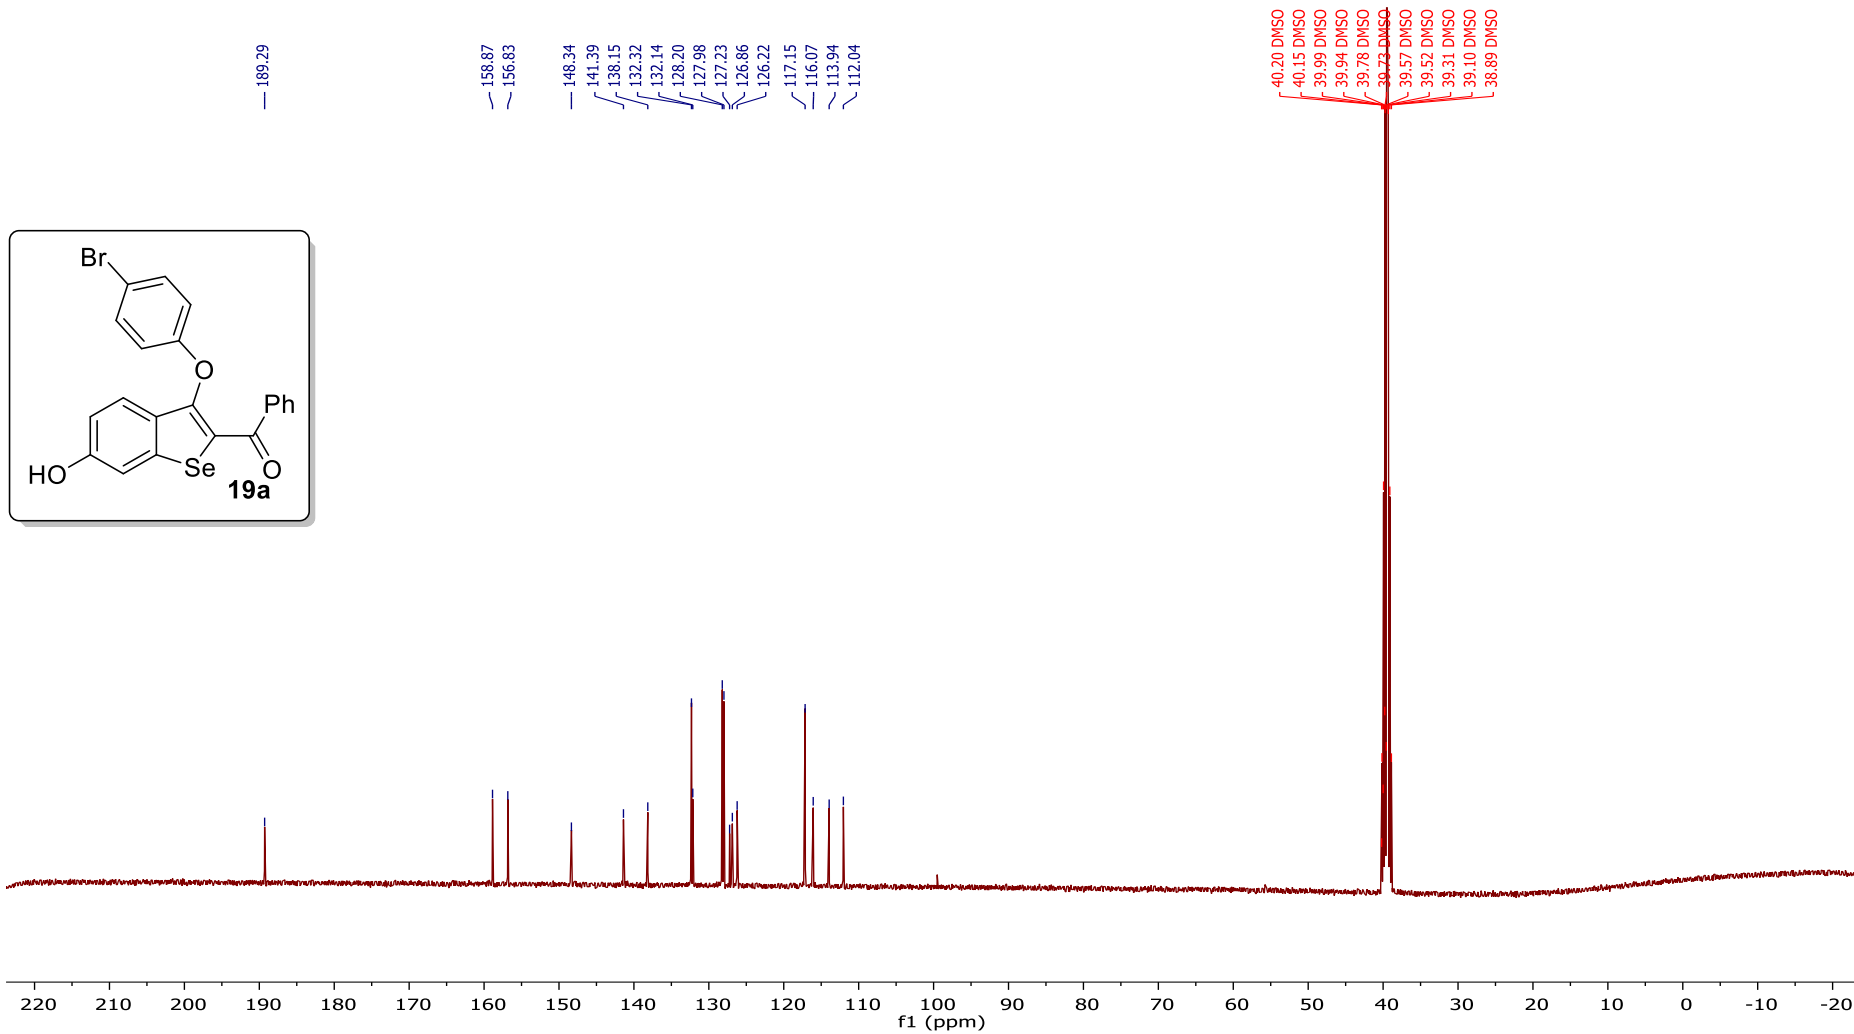



$^{77}\text{Se}$  NMR (76.37 MHz, DMSO- $d_6$ ):

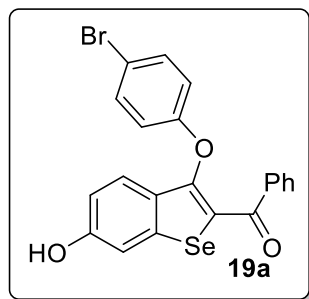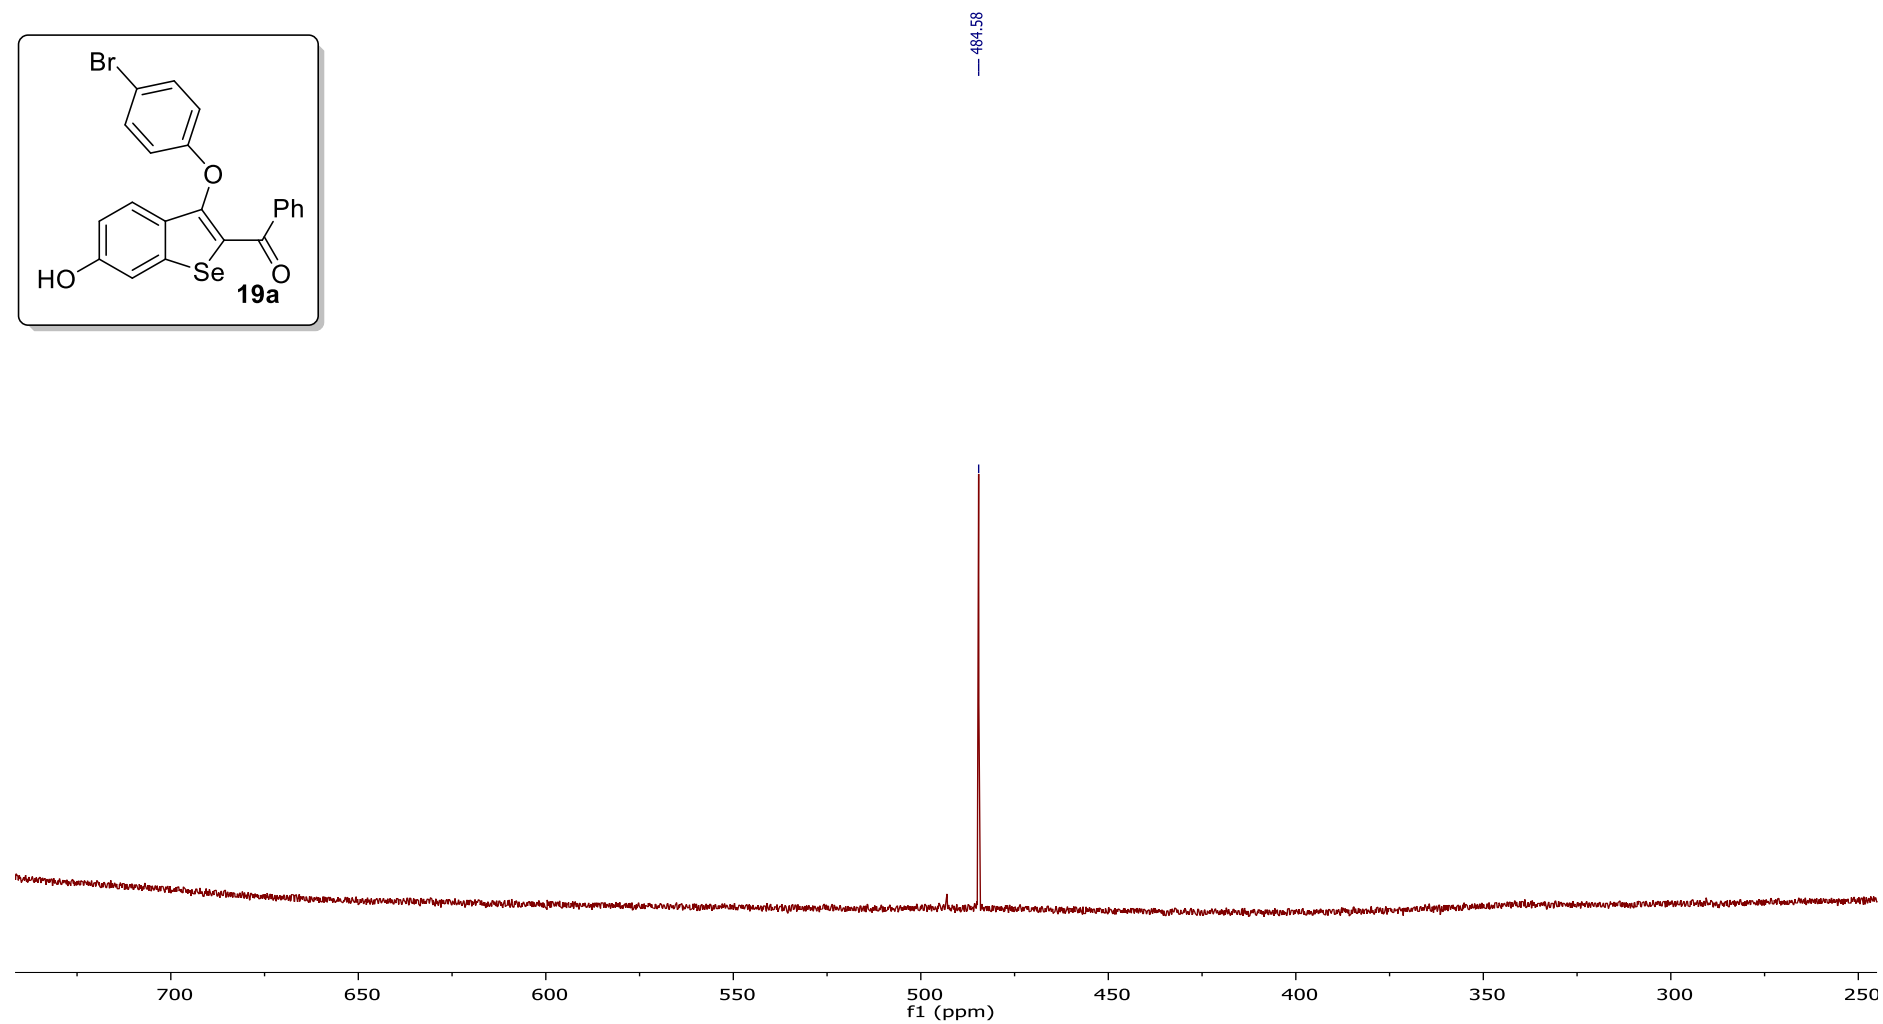

$^1\text{H}$  NMR (400 MHz, MeOD):

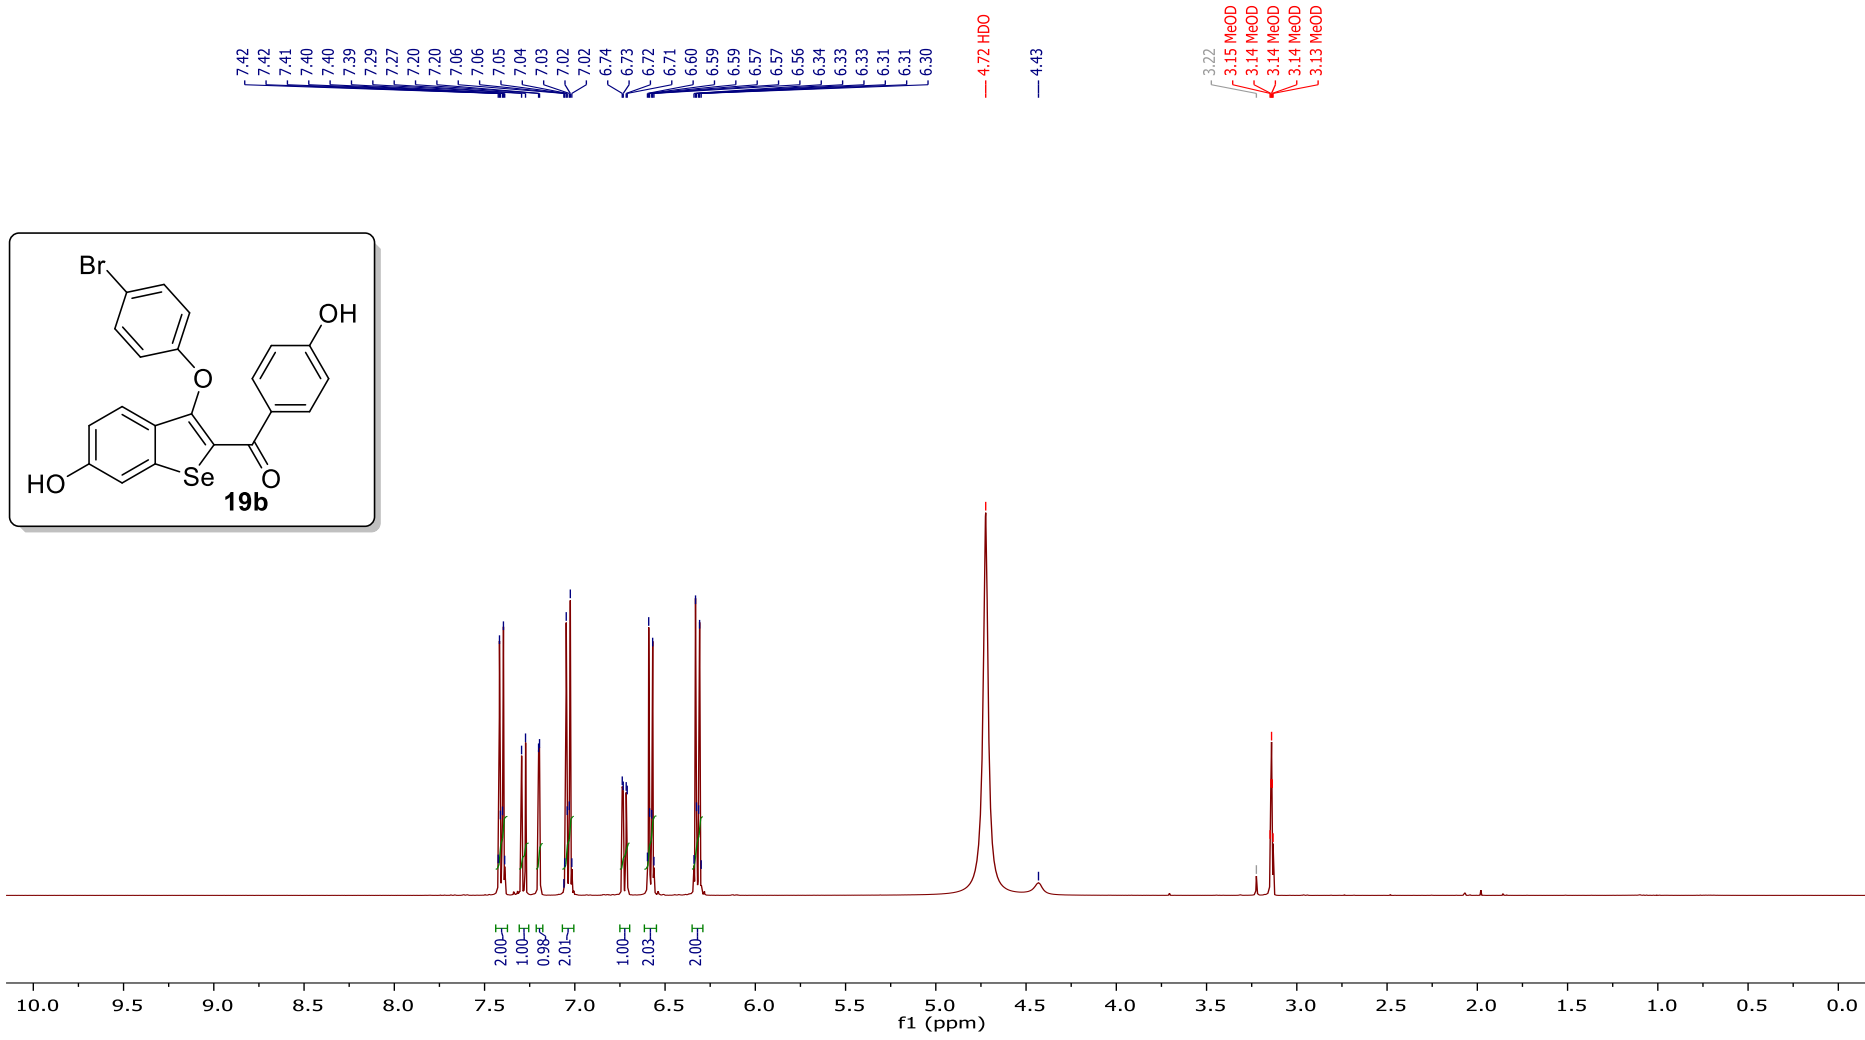

$^{13}\text{C}$  NMR (100.6 MHz, MeOD):

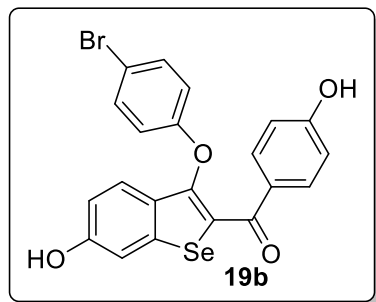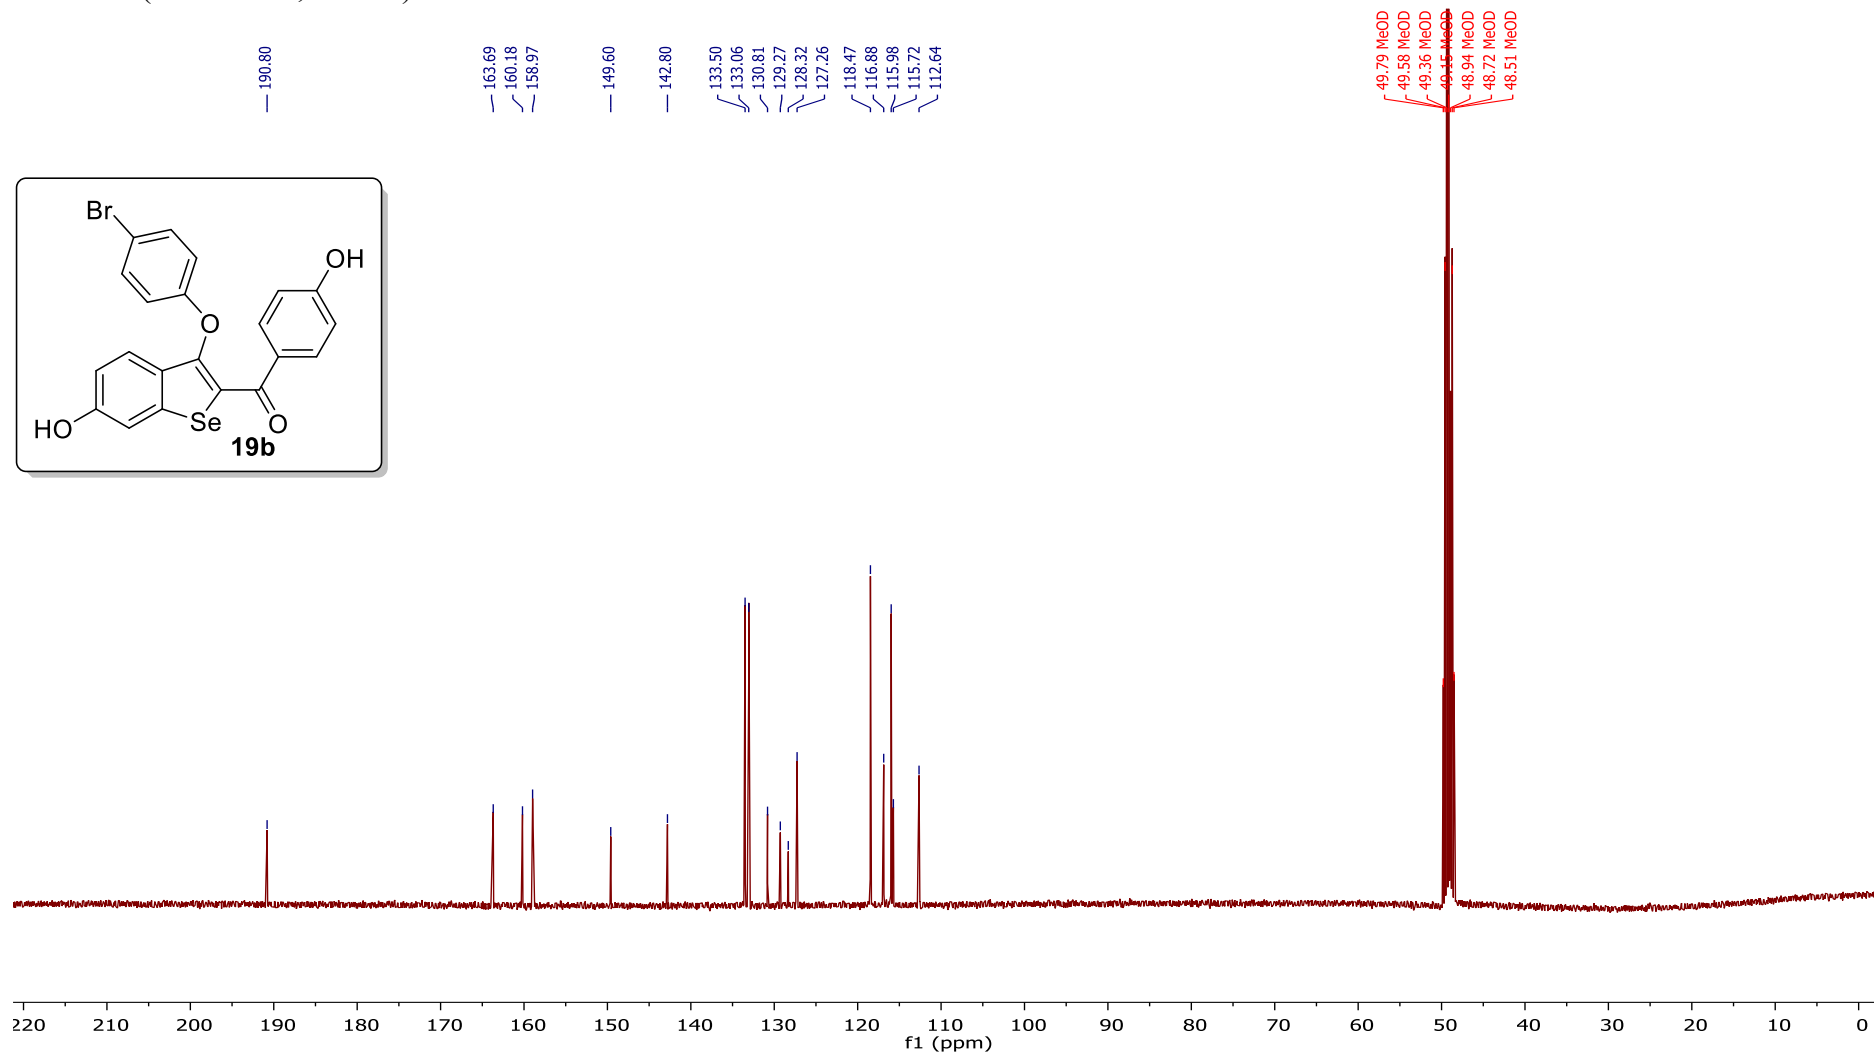

$^{77}\text{Se}$  NMR (76.37 MHz, MeOD):

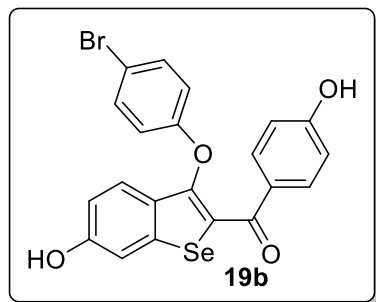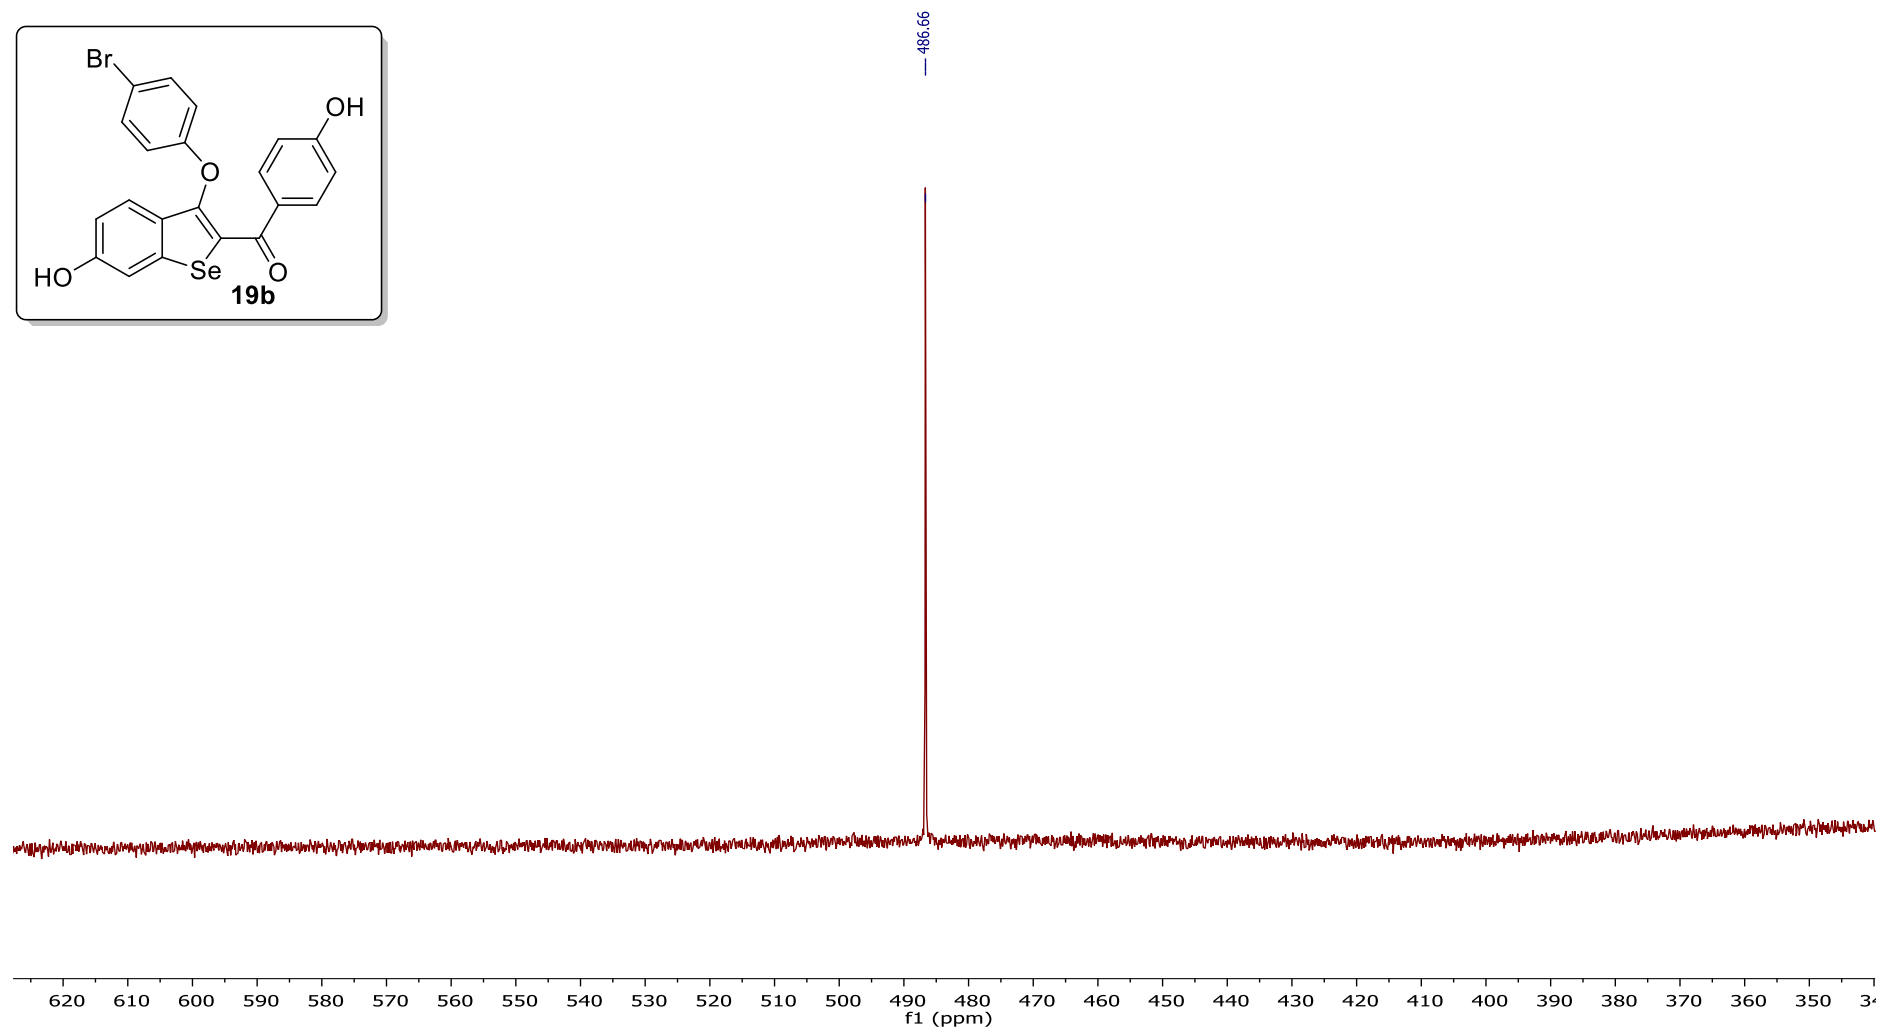

$^1\text{H}$  NMR (400 MHz, DMSO- $d_6$ ):

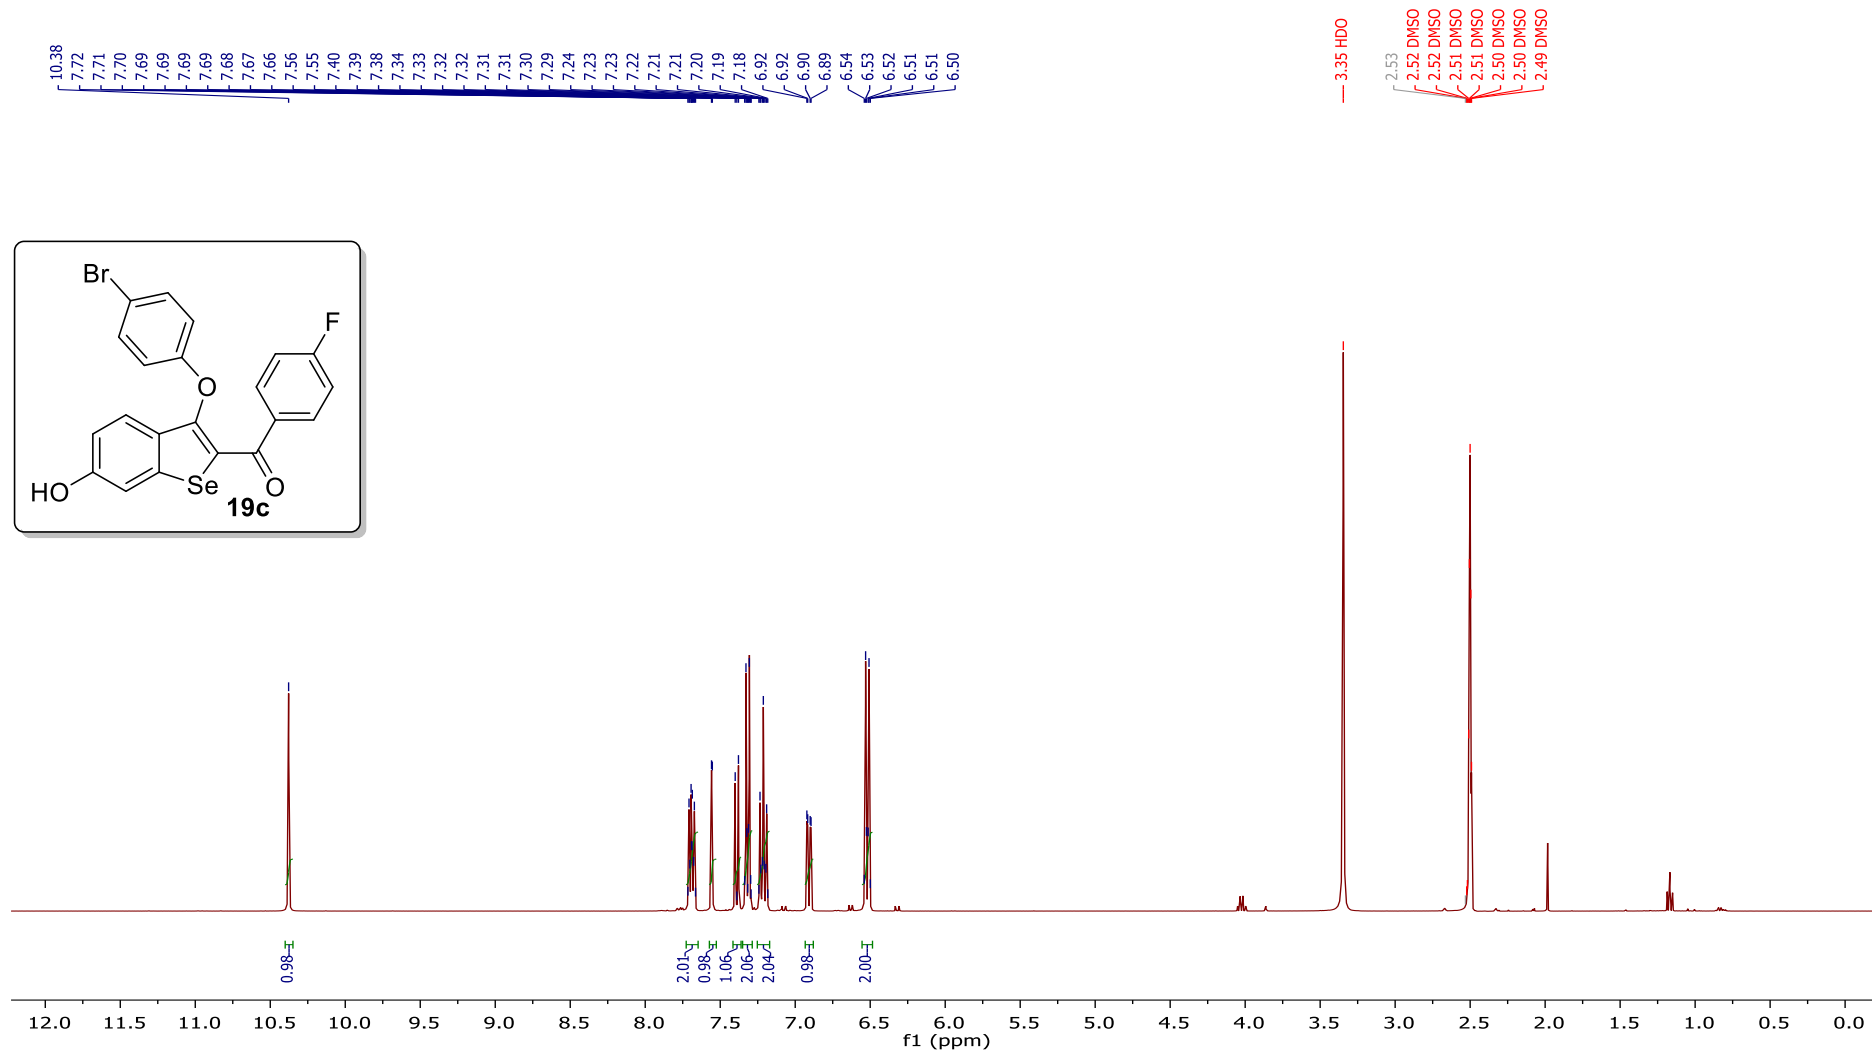

$^{13}\text{C}$  NMR (100.6 MHz, DMSO- $d_6$ ):

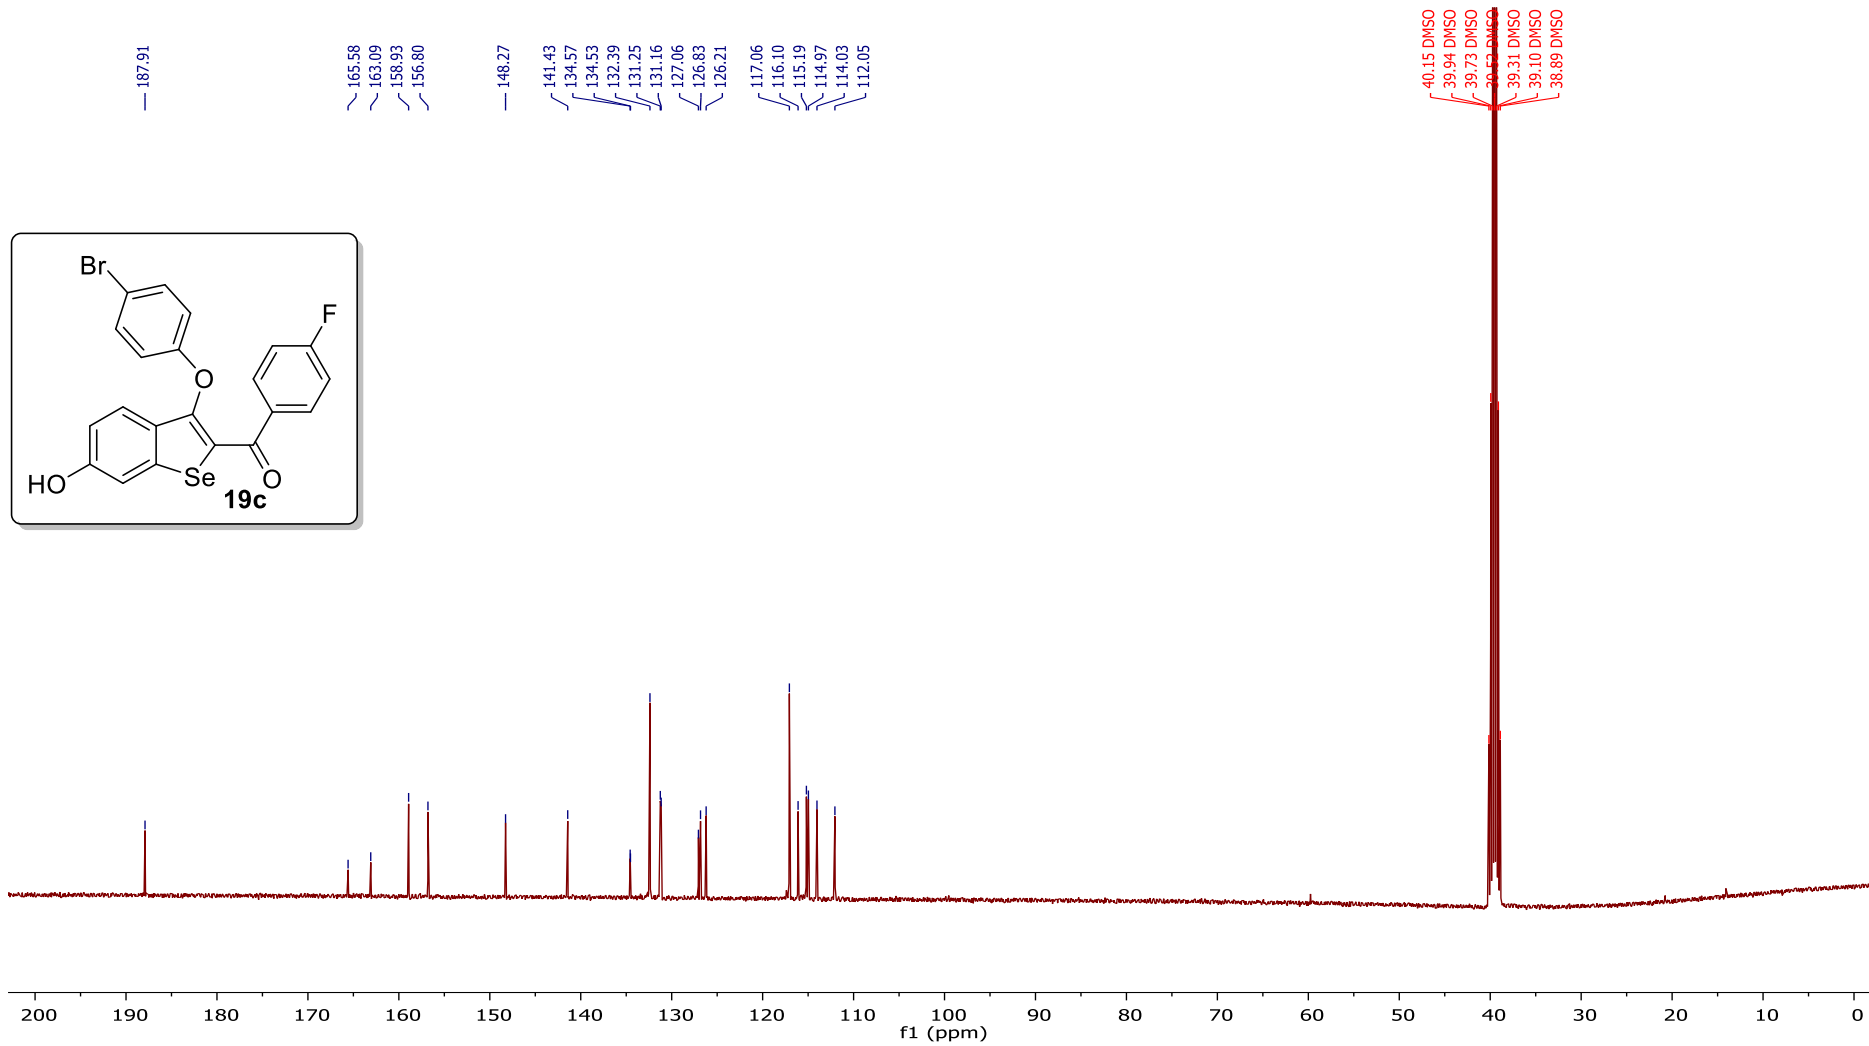

$^{19}\text{F}$  NMR (376.21 MHz,  $\text{DMSO-d}_6$ ):

-106.94  
-106.97  
-106.98  
-107.00  
-107.02

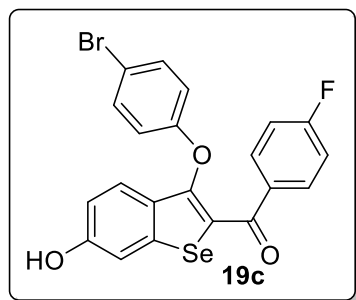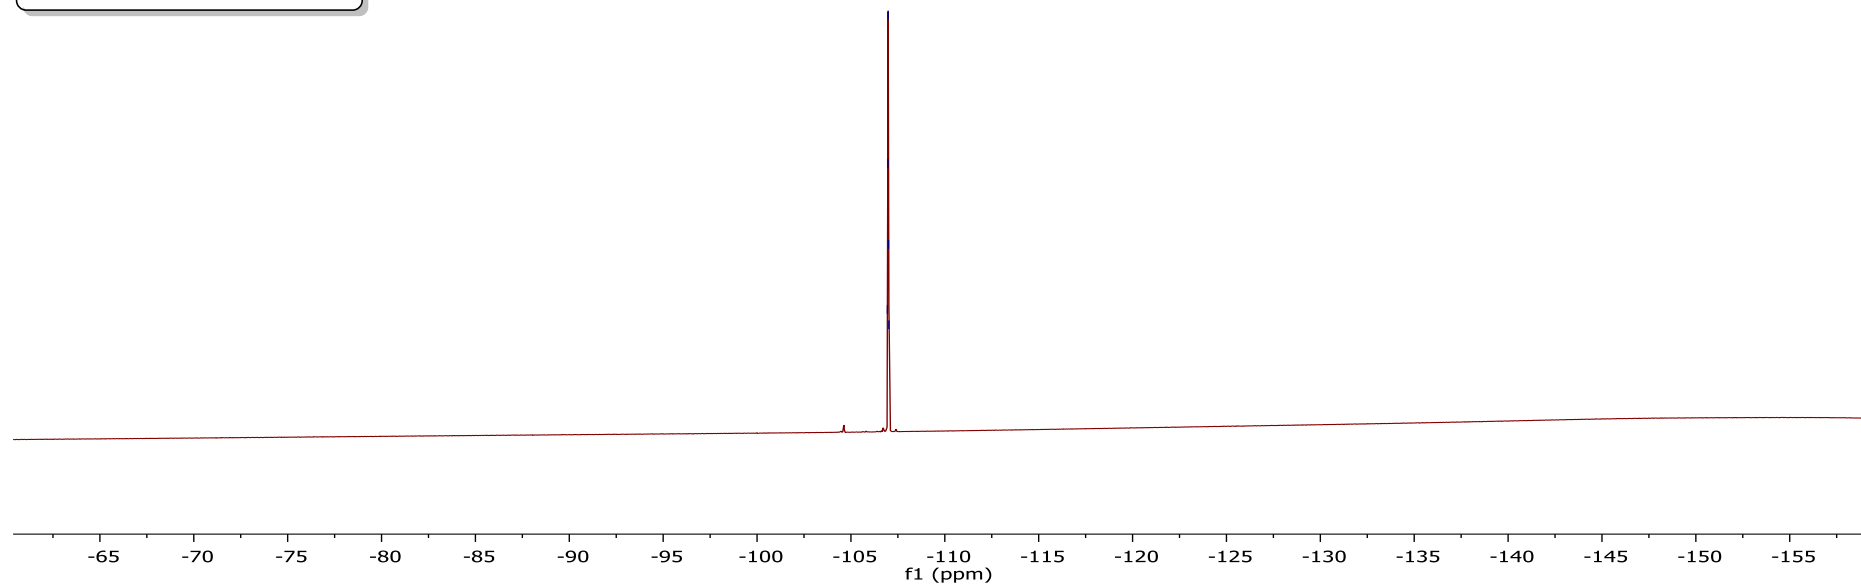

$^{77}\text{Se}$  NMR (76.37 MHz, DMSO- $d_6$ ):

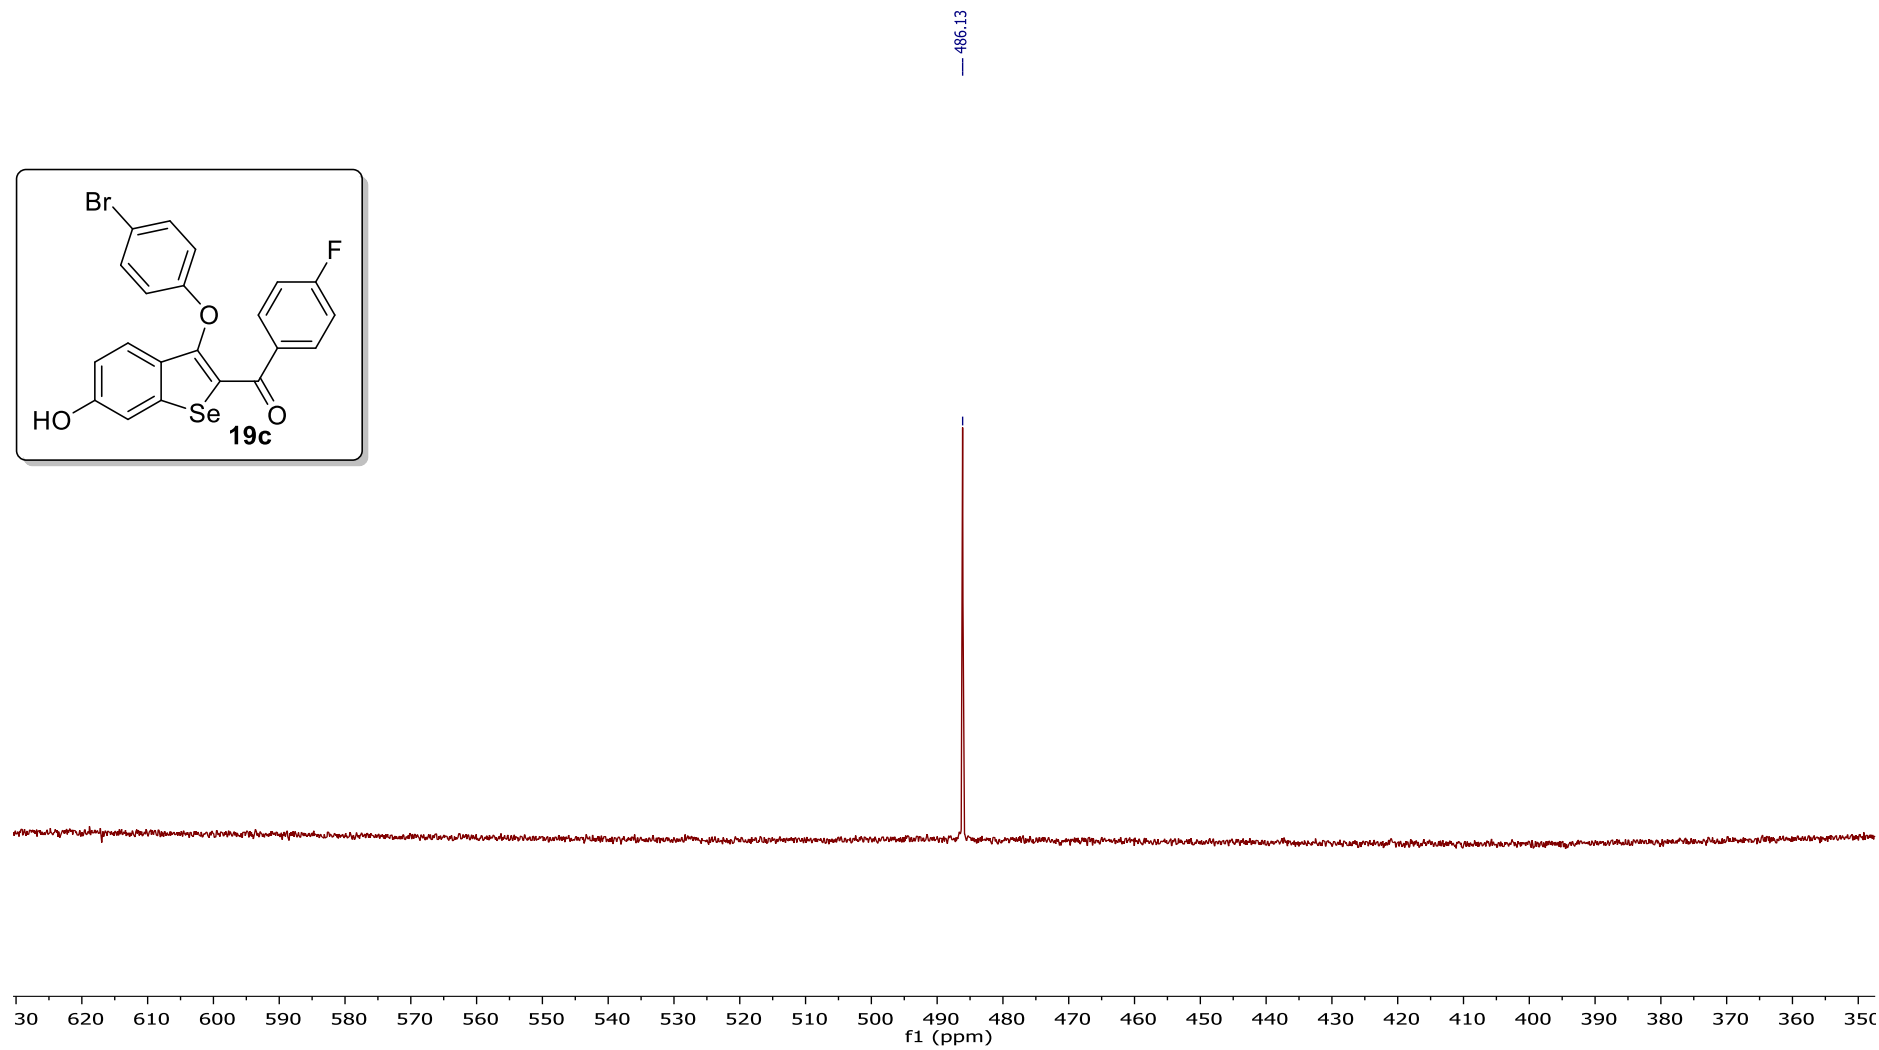



$^1\text{H}$  NMR (400 MHz, DMSO- $d_6$ ):

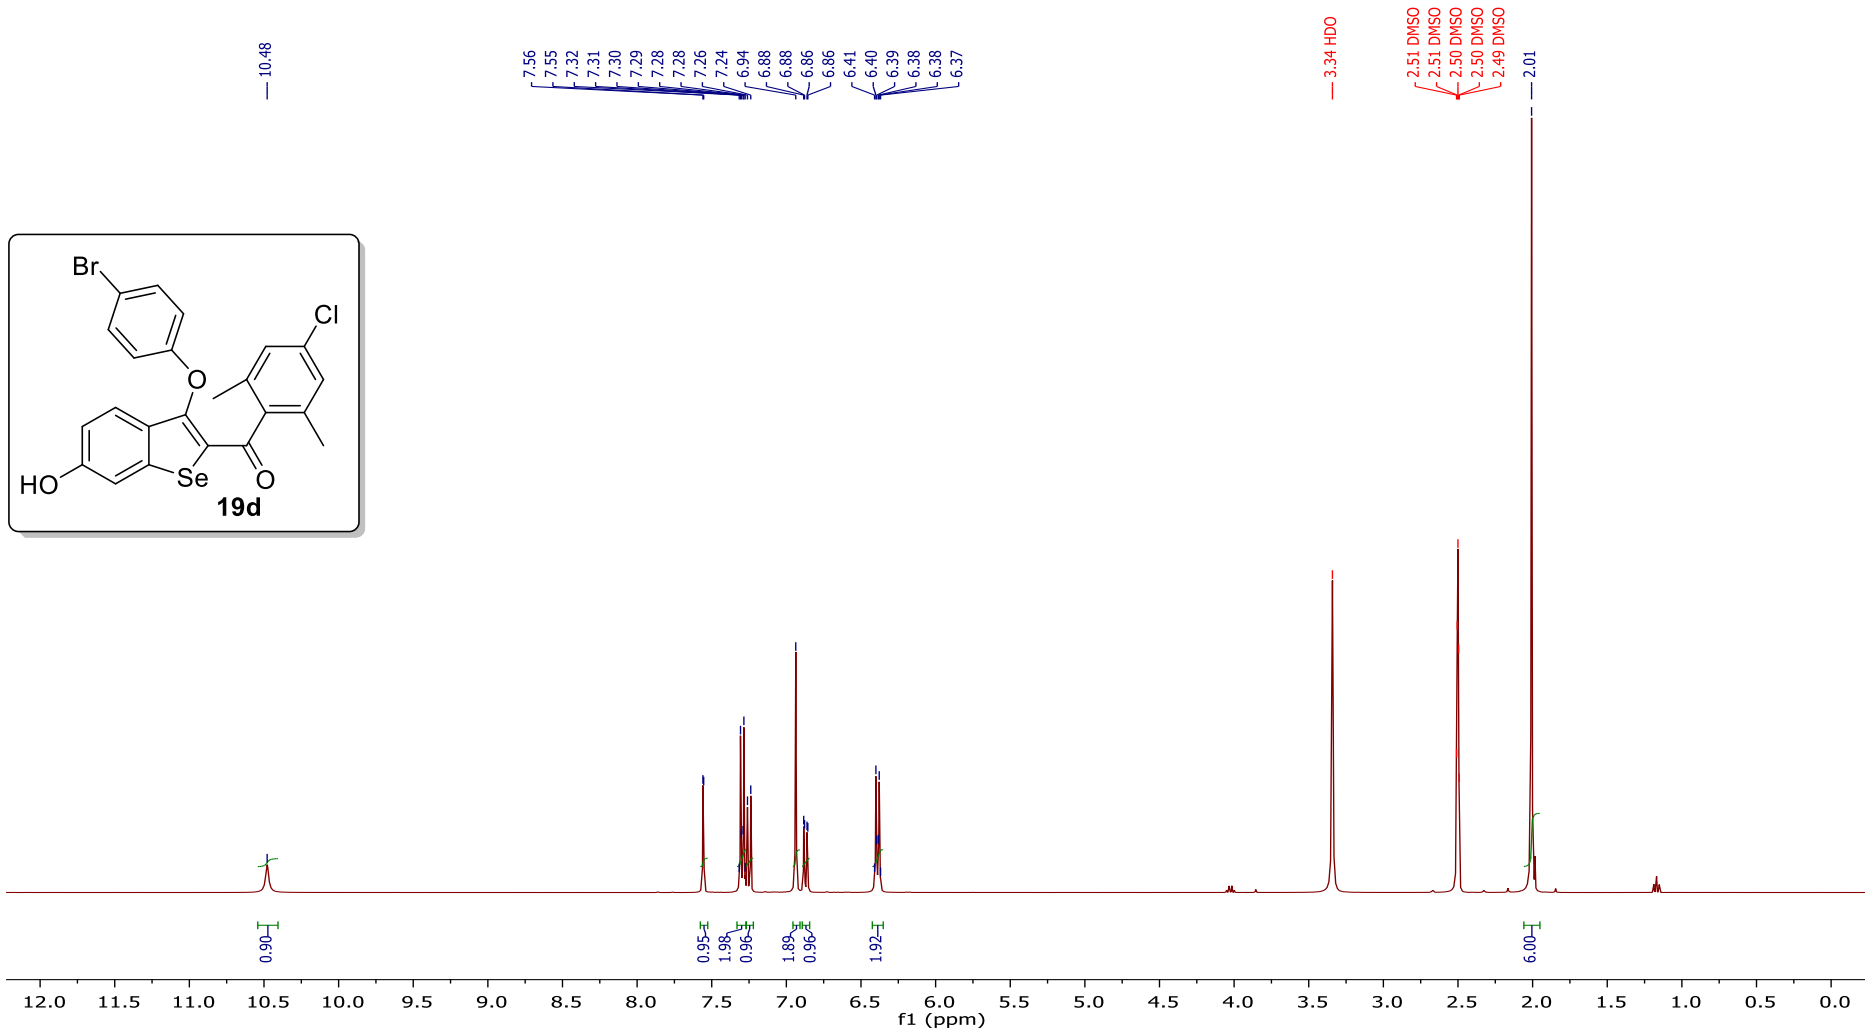

$^{13}\text{C}$  NMR (100.6 MHz, DMSO- $\text{d}_6$ ):

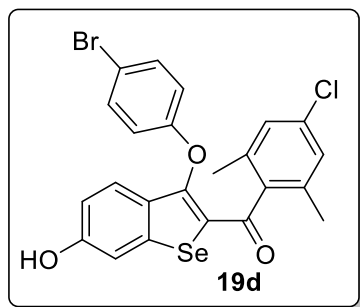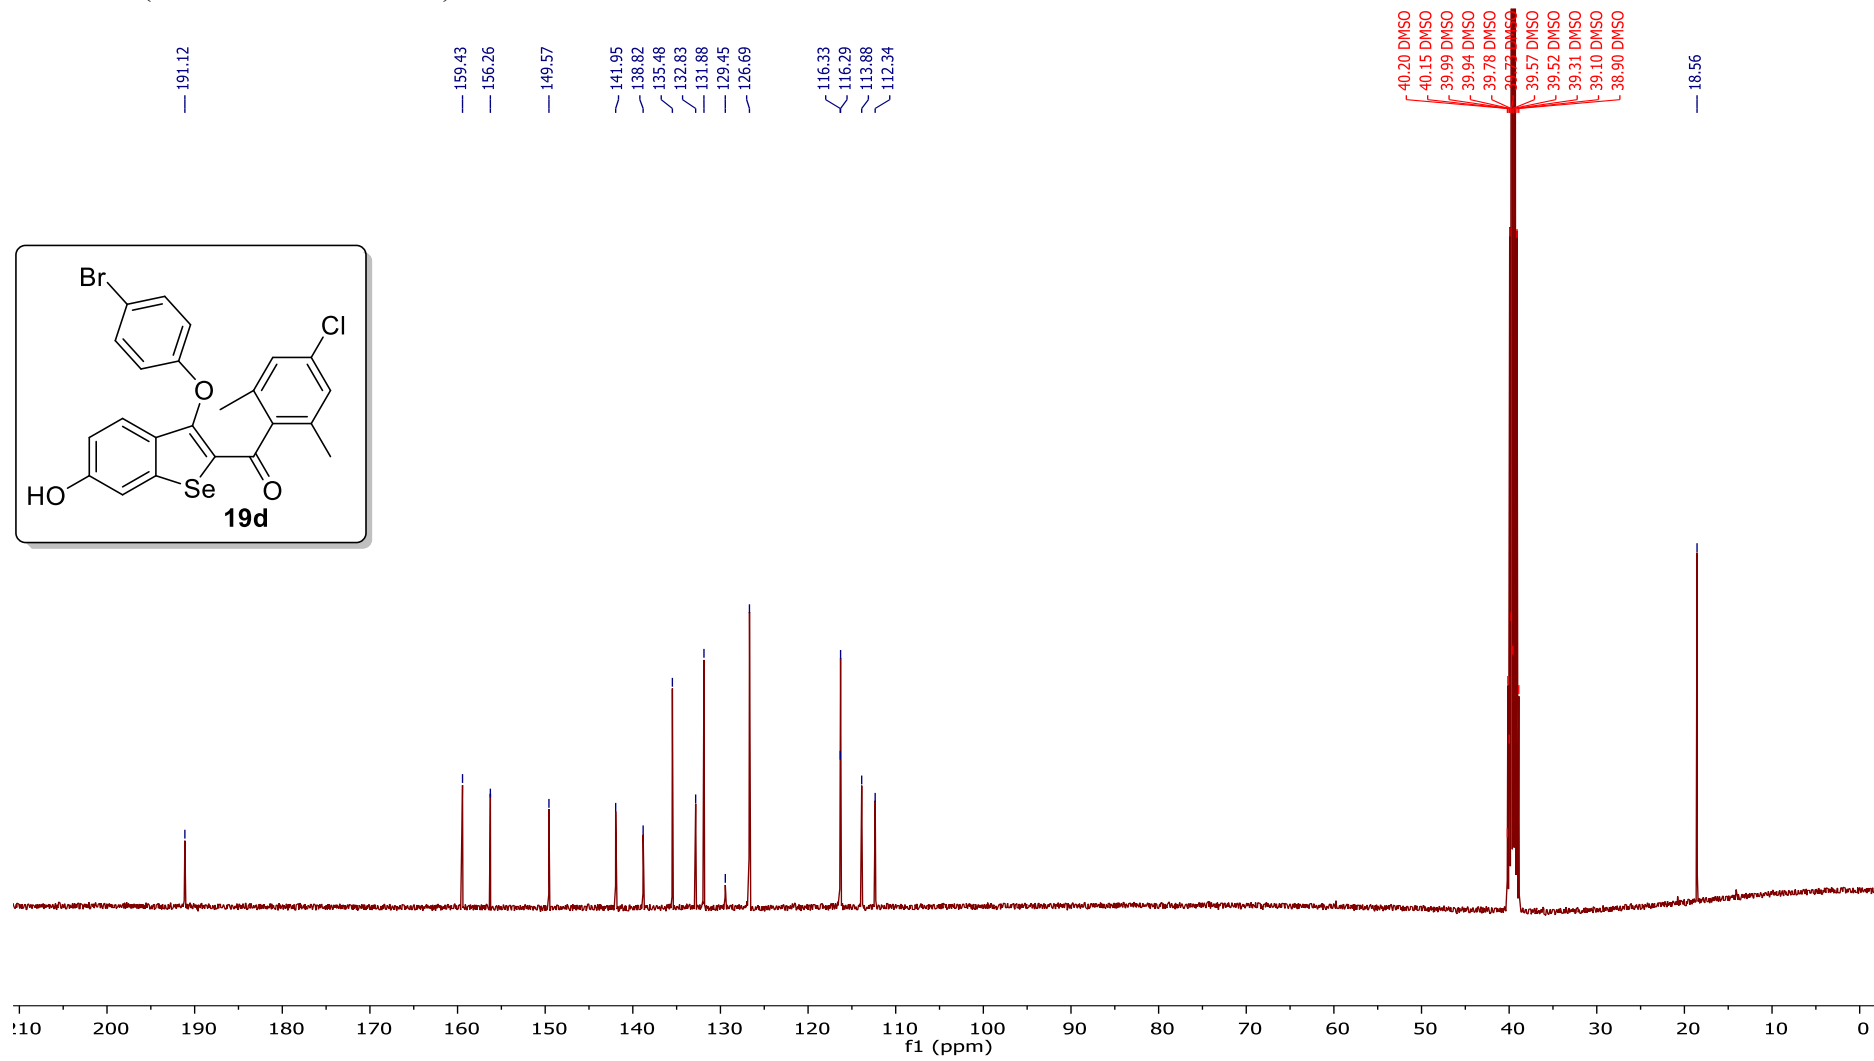

$^{77}\text{Se}$  NMR (76.37 MHz, DMSO- $d_6$ ):

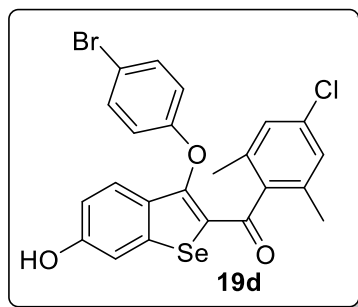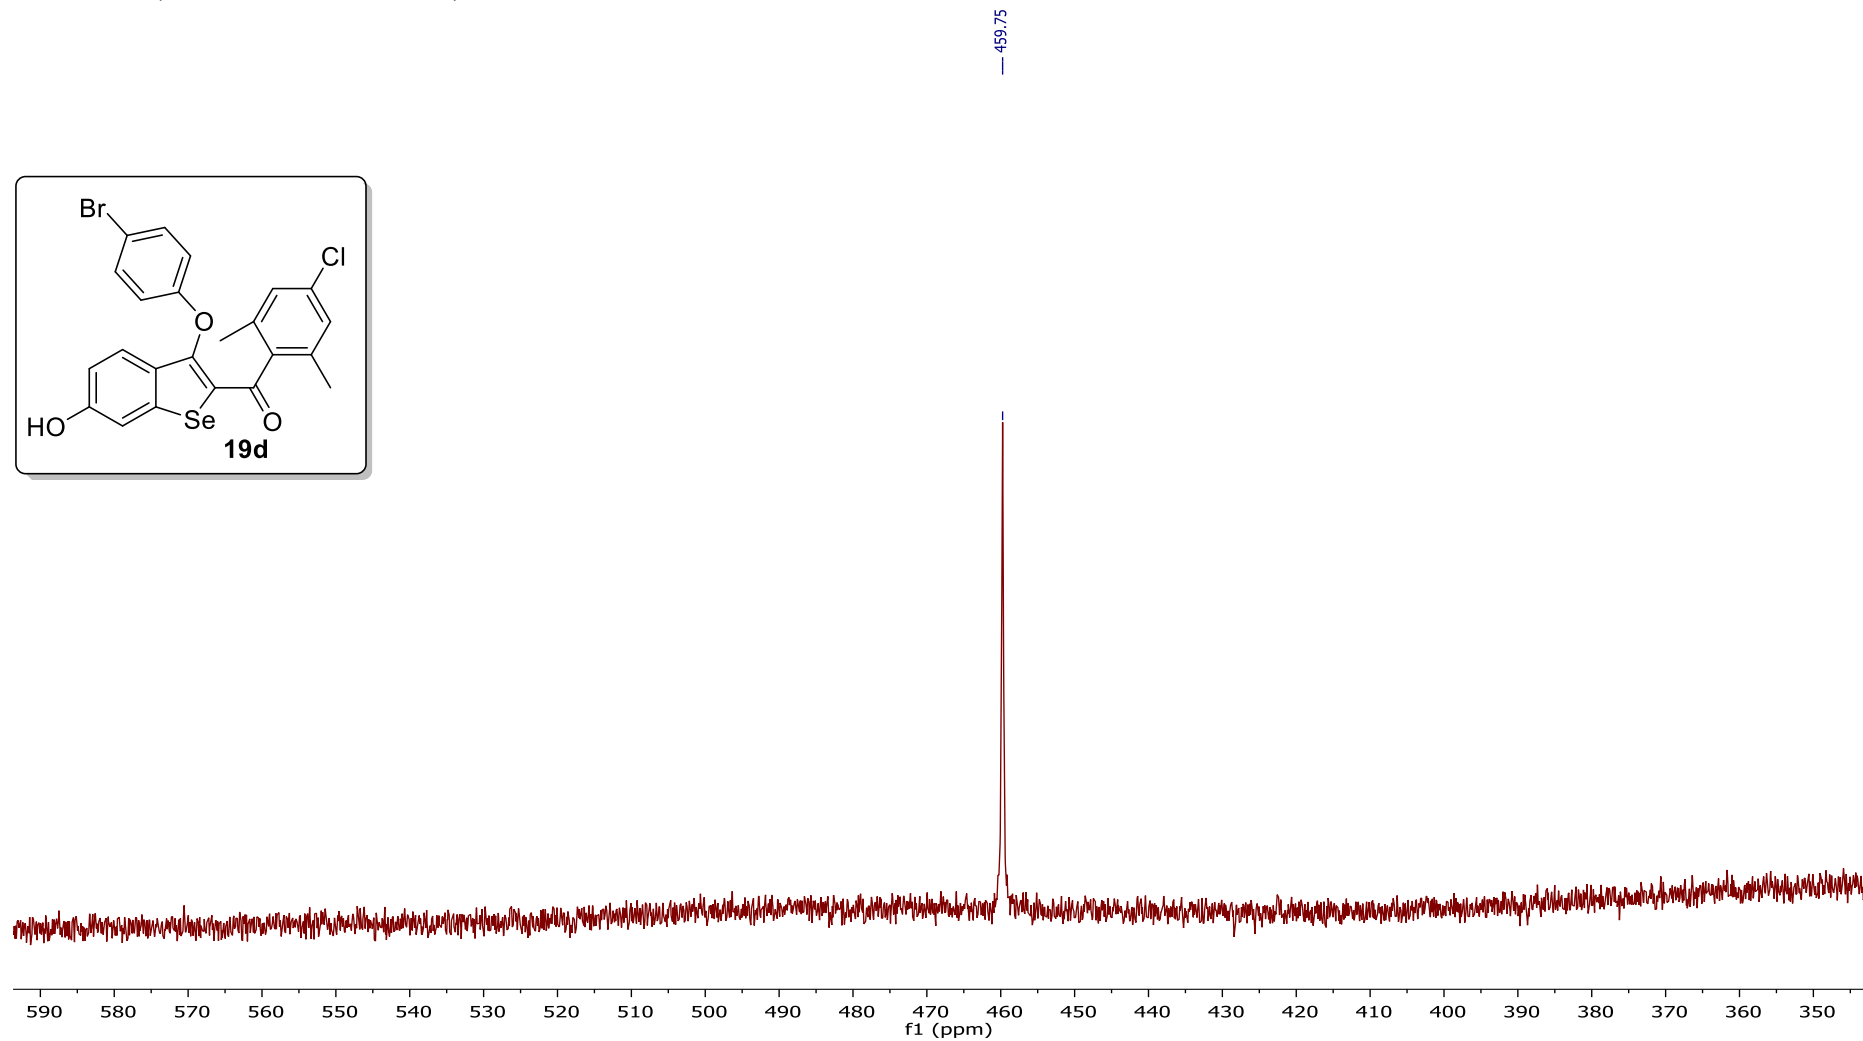

$^1\text{H}$  NMR (400 MHz,  $\text{CDCl}_3$ ):

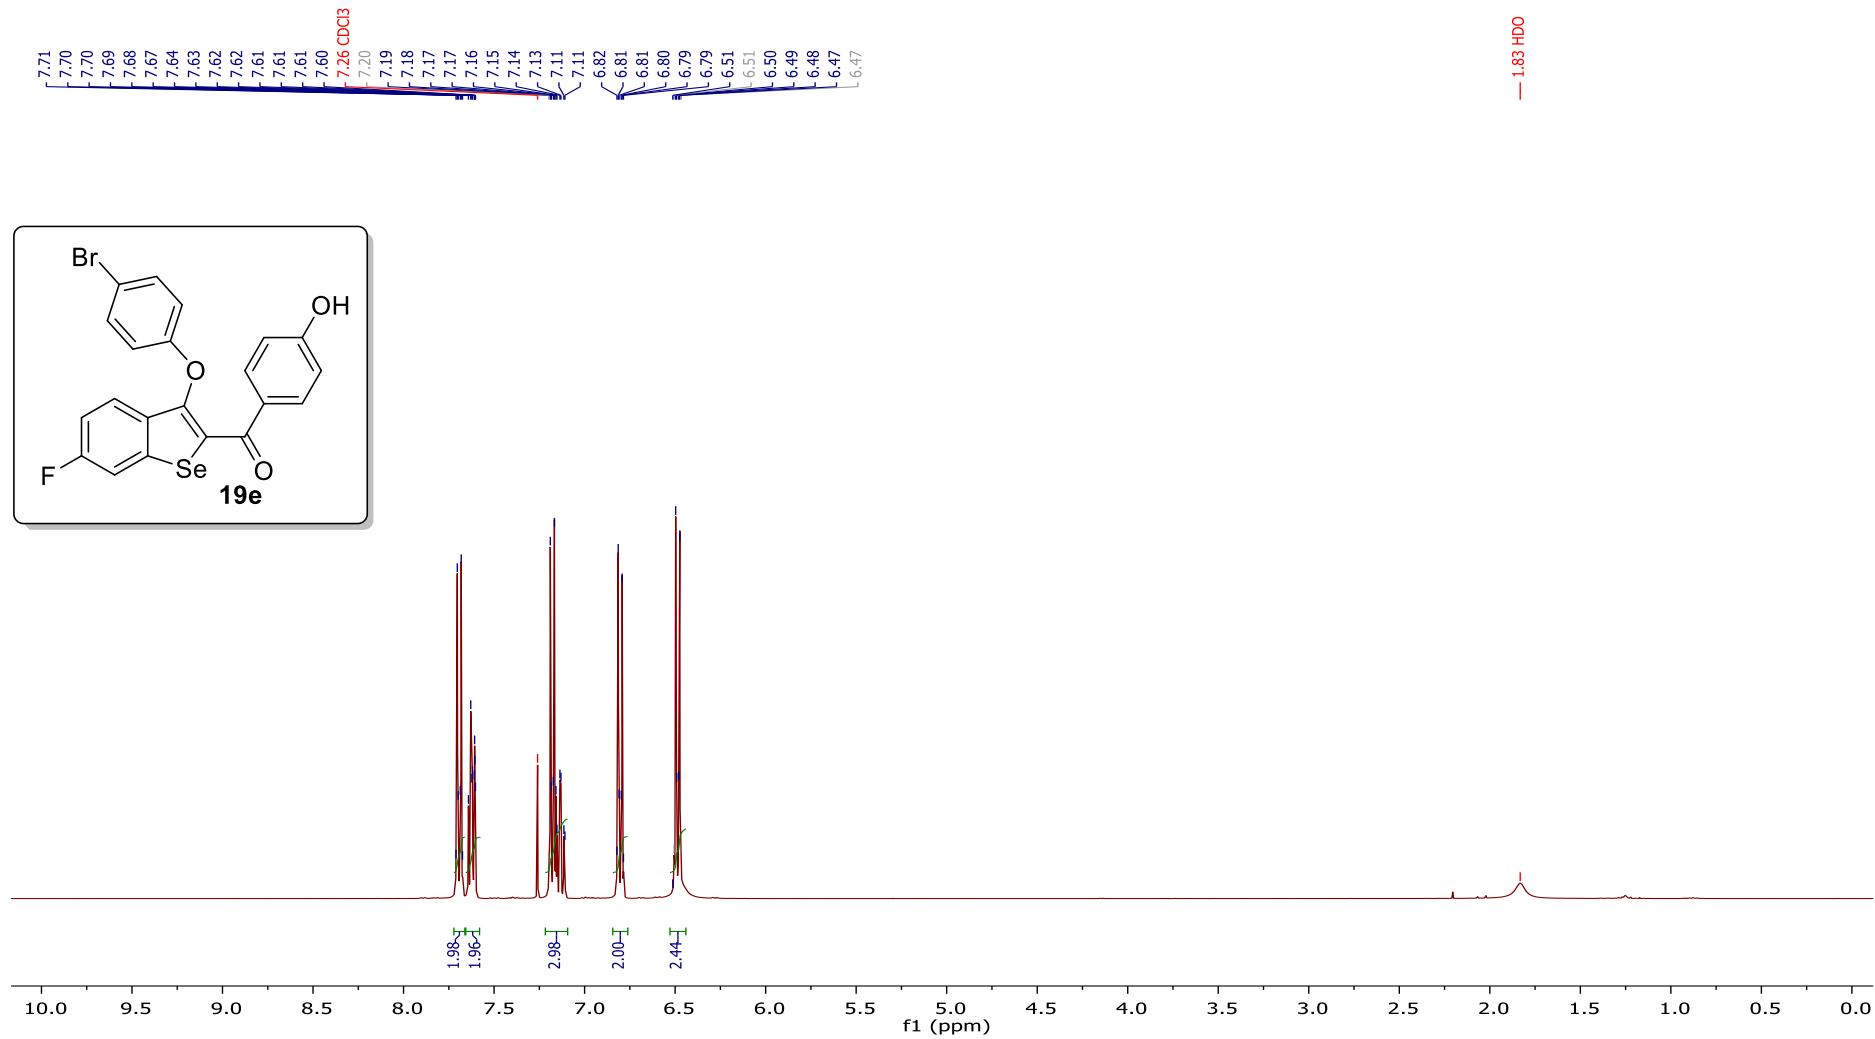

$^{13}\text{C}$  NMR (100.6 MHz,  $\text{CDCl}_3$ ):

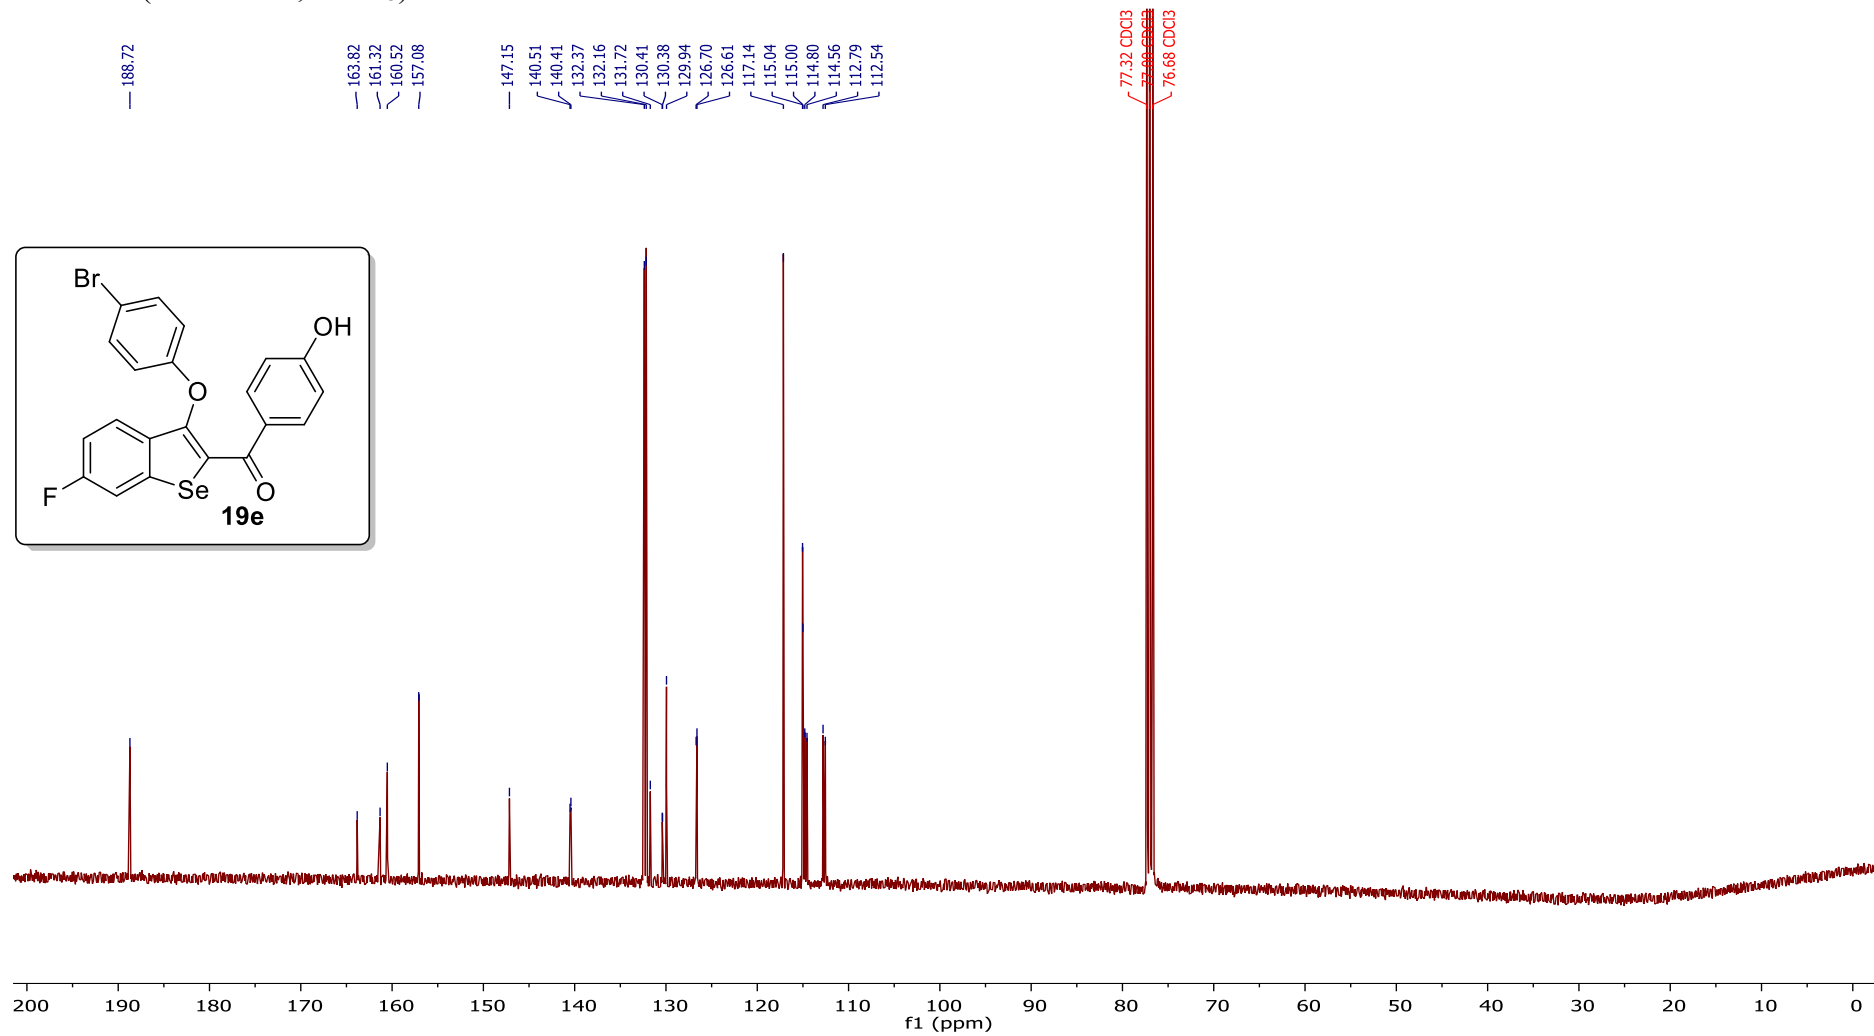

$^{19}\text{F}$  NMR (376.21 MHz, DMSO- $d_6$ ):

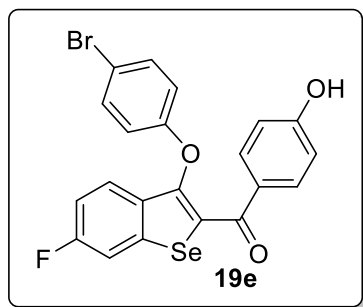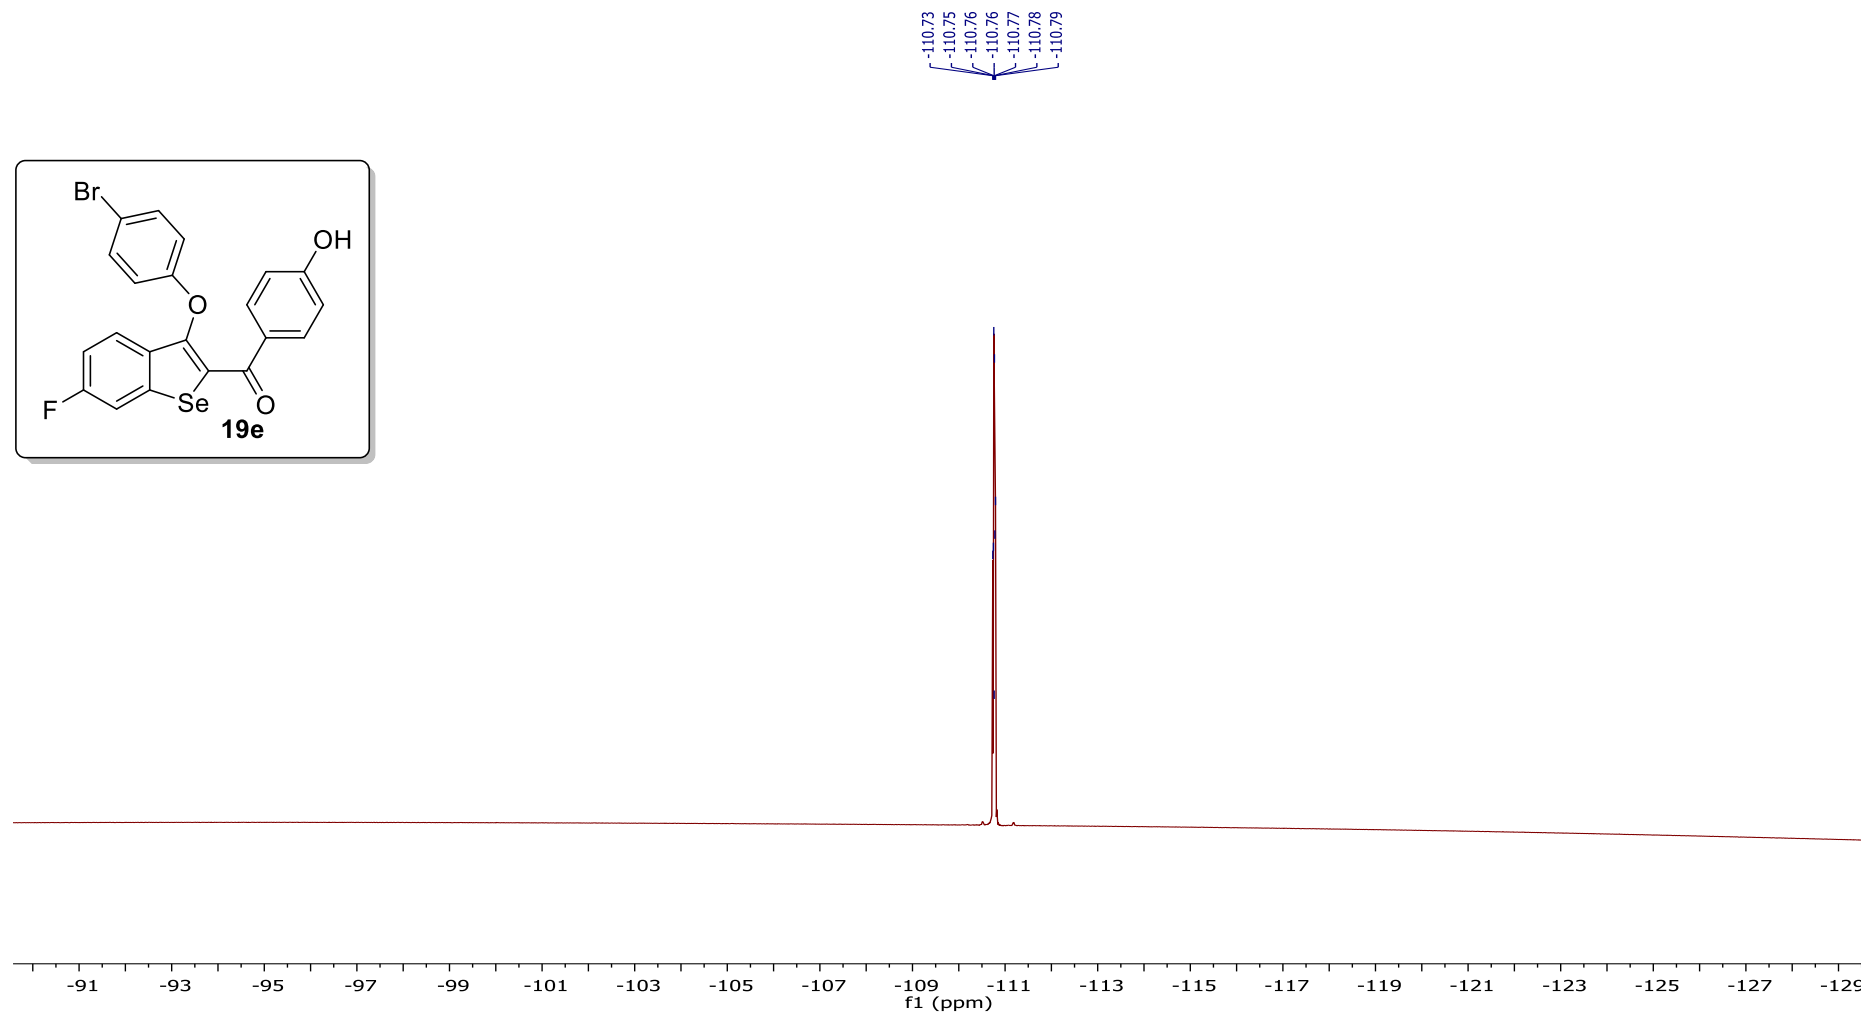

$^{77}\text{Se}$  NMR (76.37 MHz,  $\text{CDCl}_3$ ):

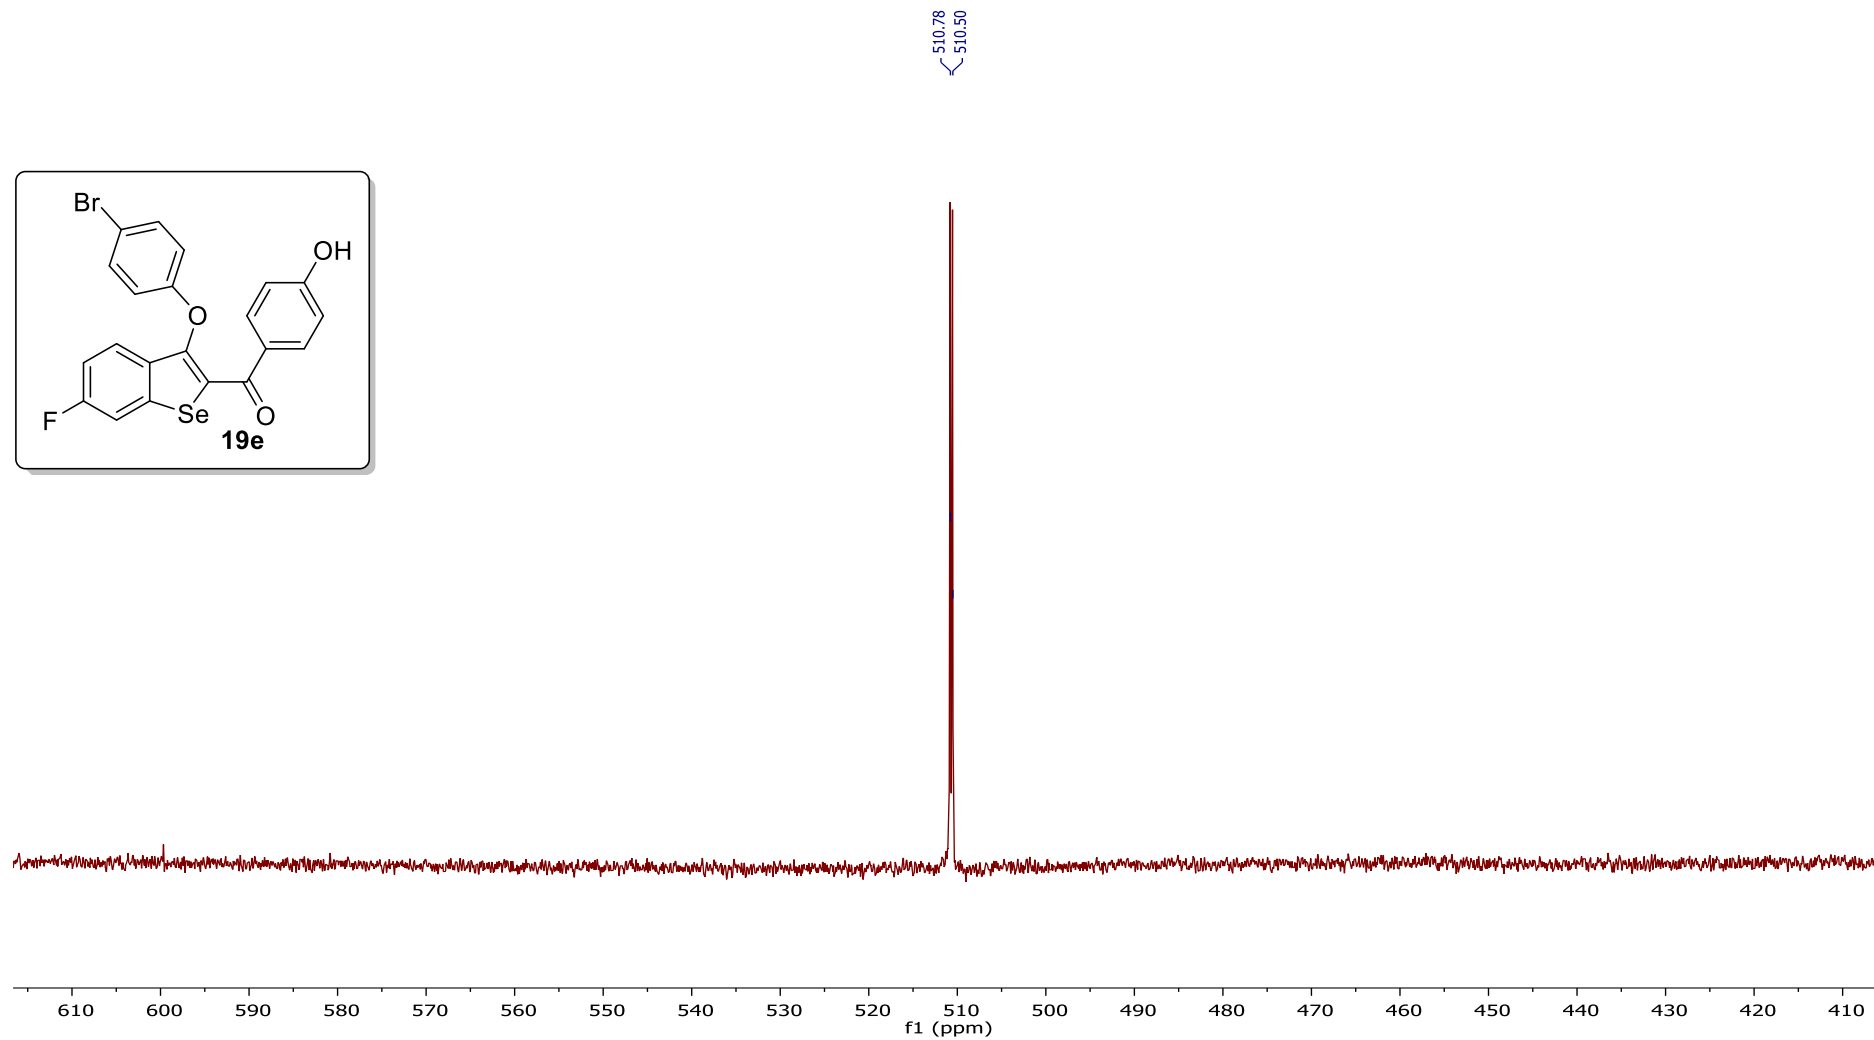

<sup>1</sup>H NMR (400 MHz, DMSO-d<sub>6</sub>):

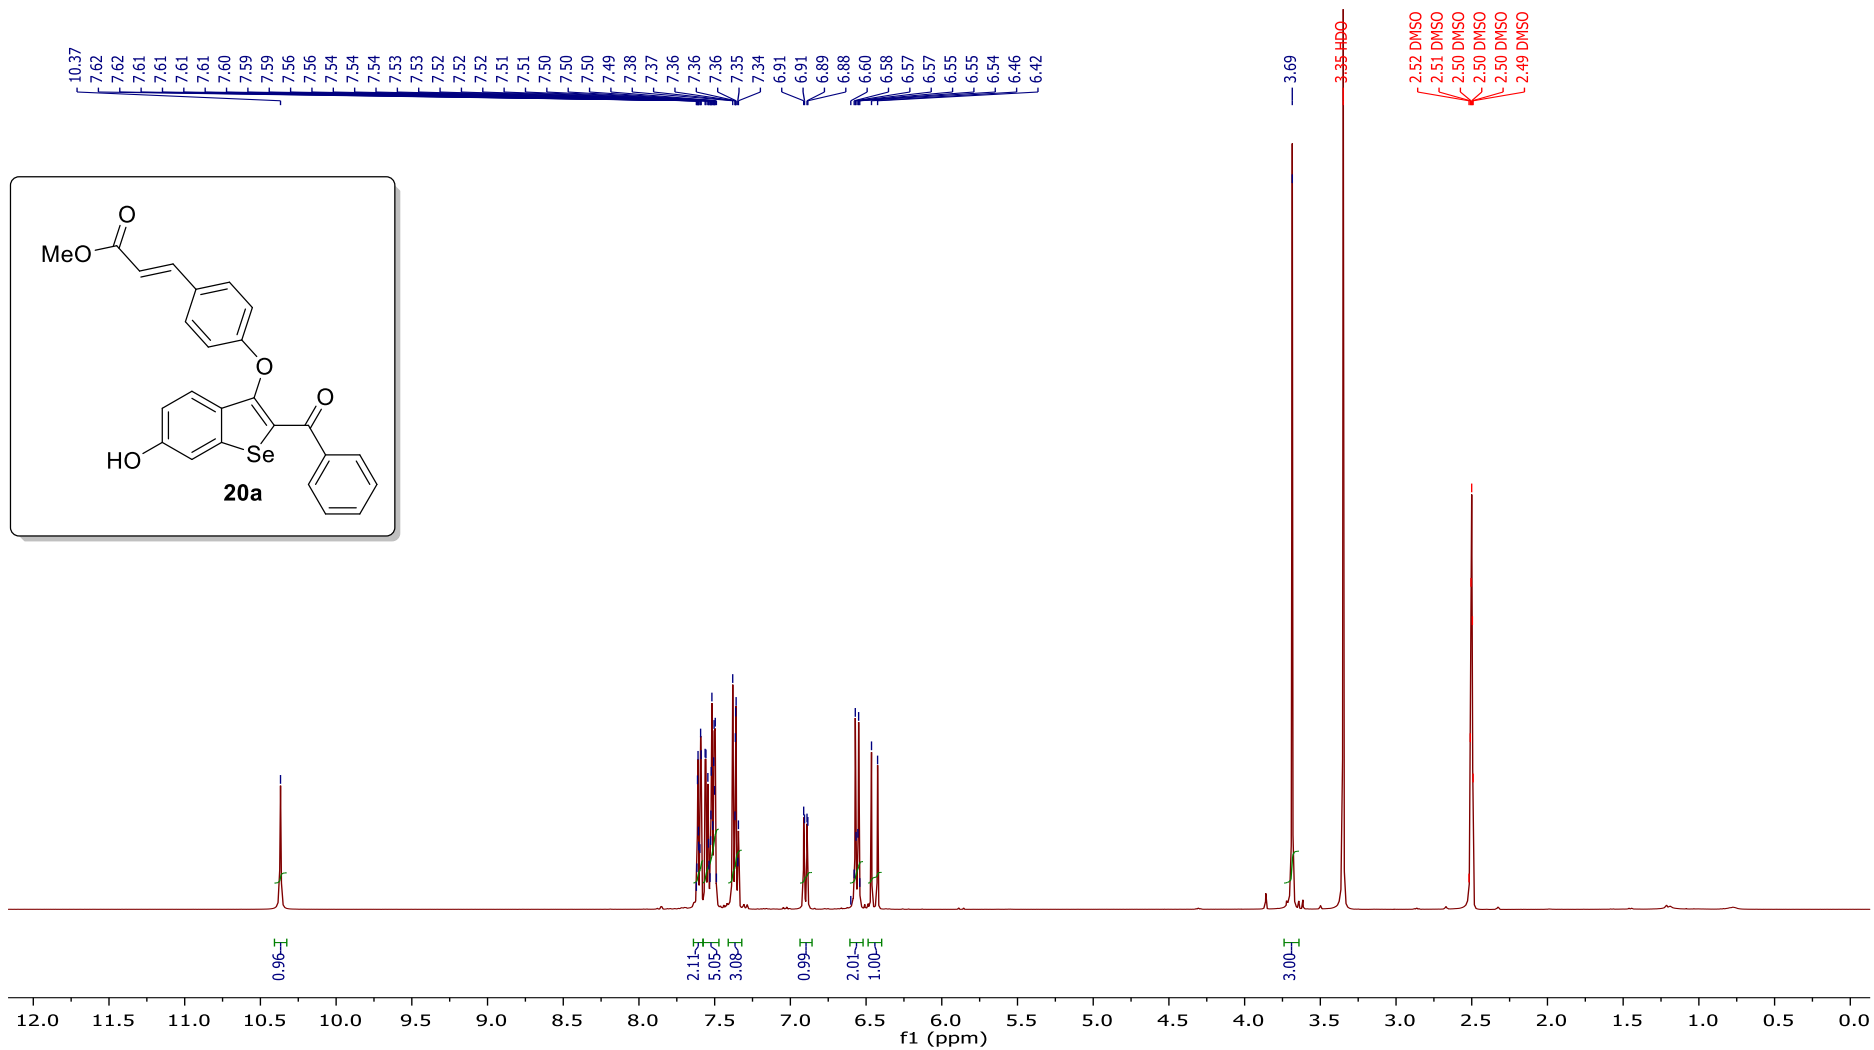



$^{13}\text{C}$  NMR (100.6 MHz, DMSO- $d_6$ ):

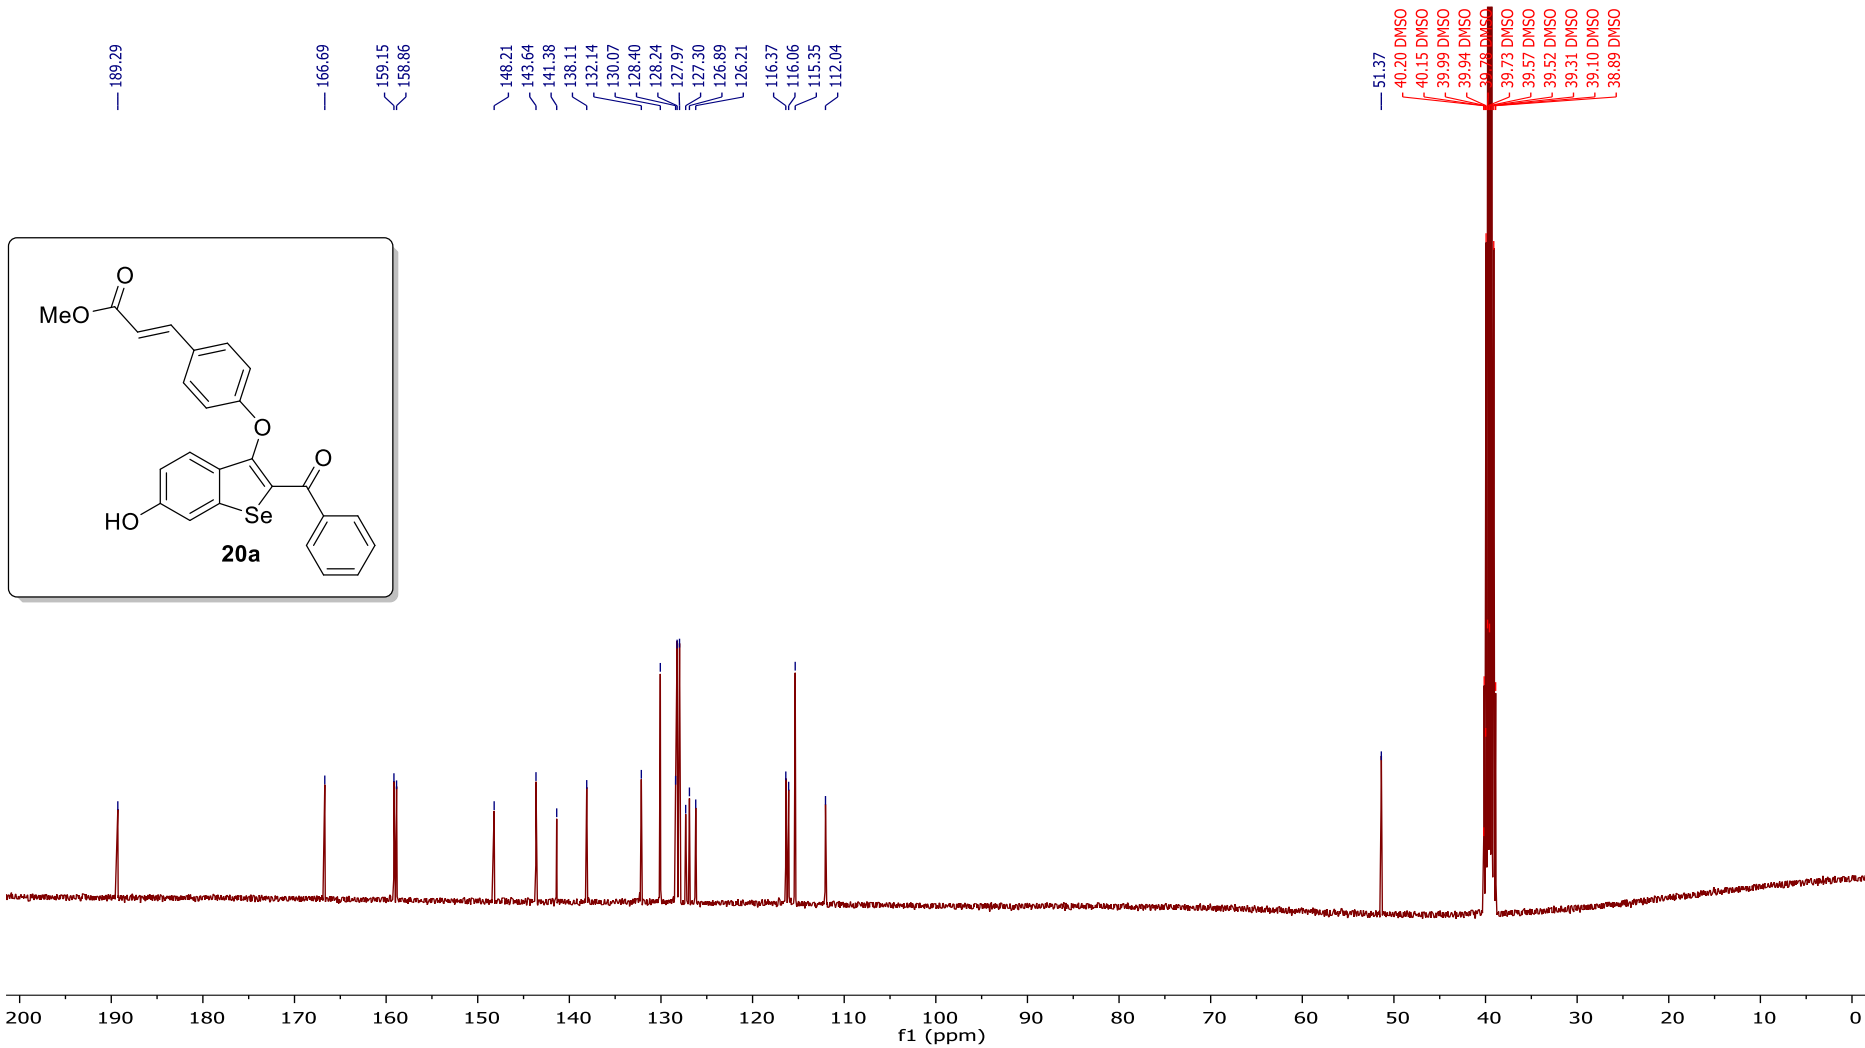

$^{77}\text{Se}$  NMR (76.37 MHz, DMSO- $d_6$ ):

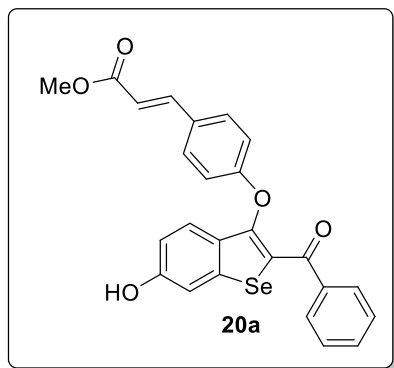

— 485.17

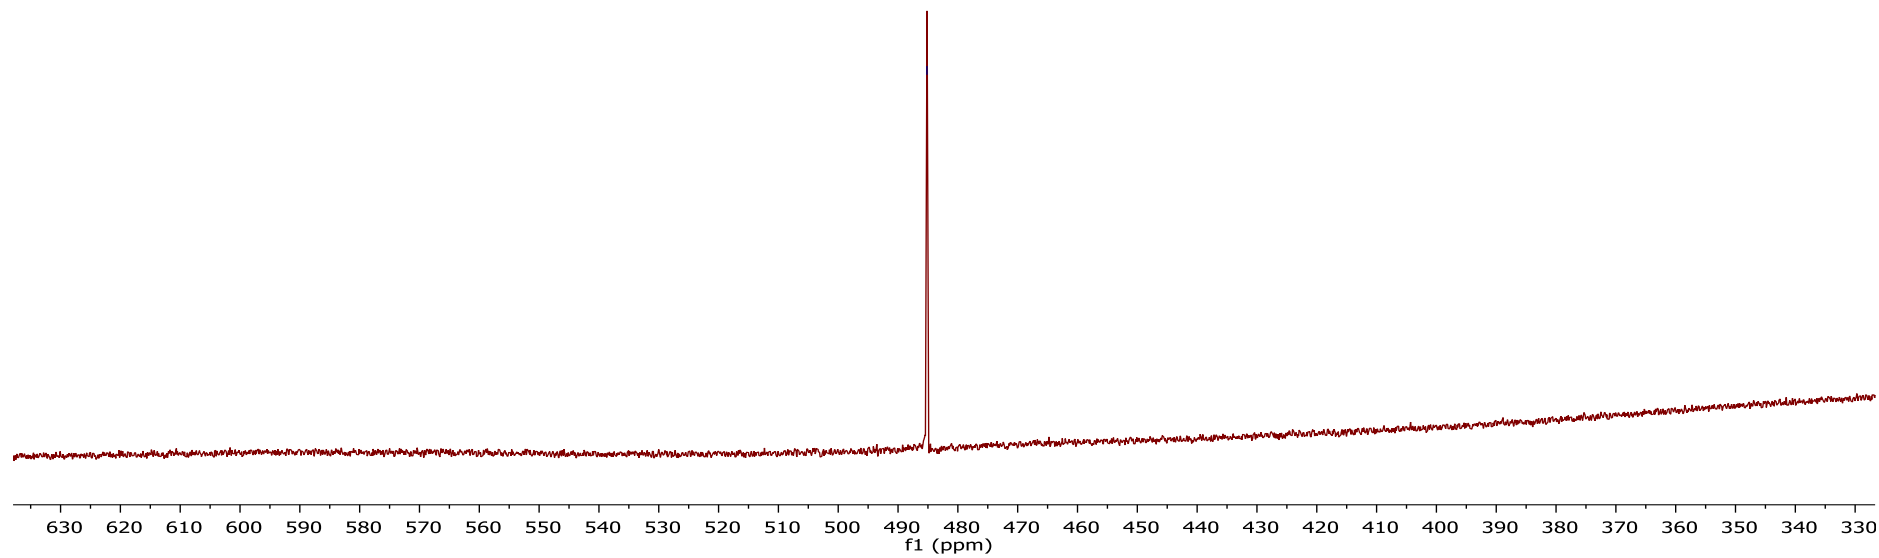

$^1\text{H}$  NMR (400 MHz, DMSO- $d_6$ ):

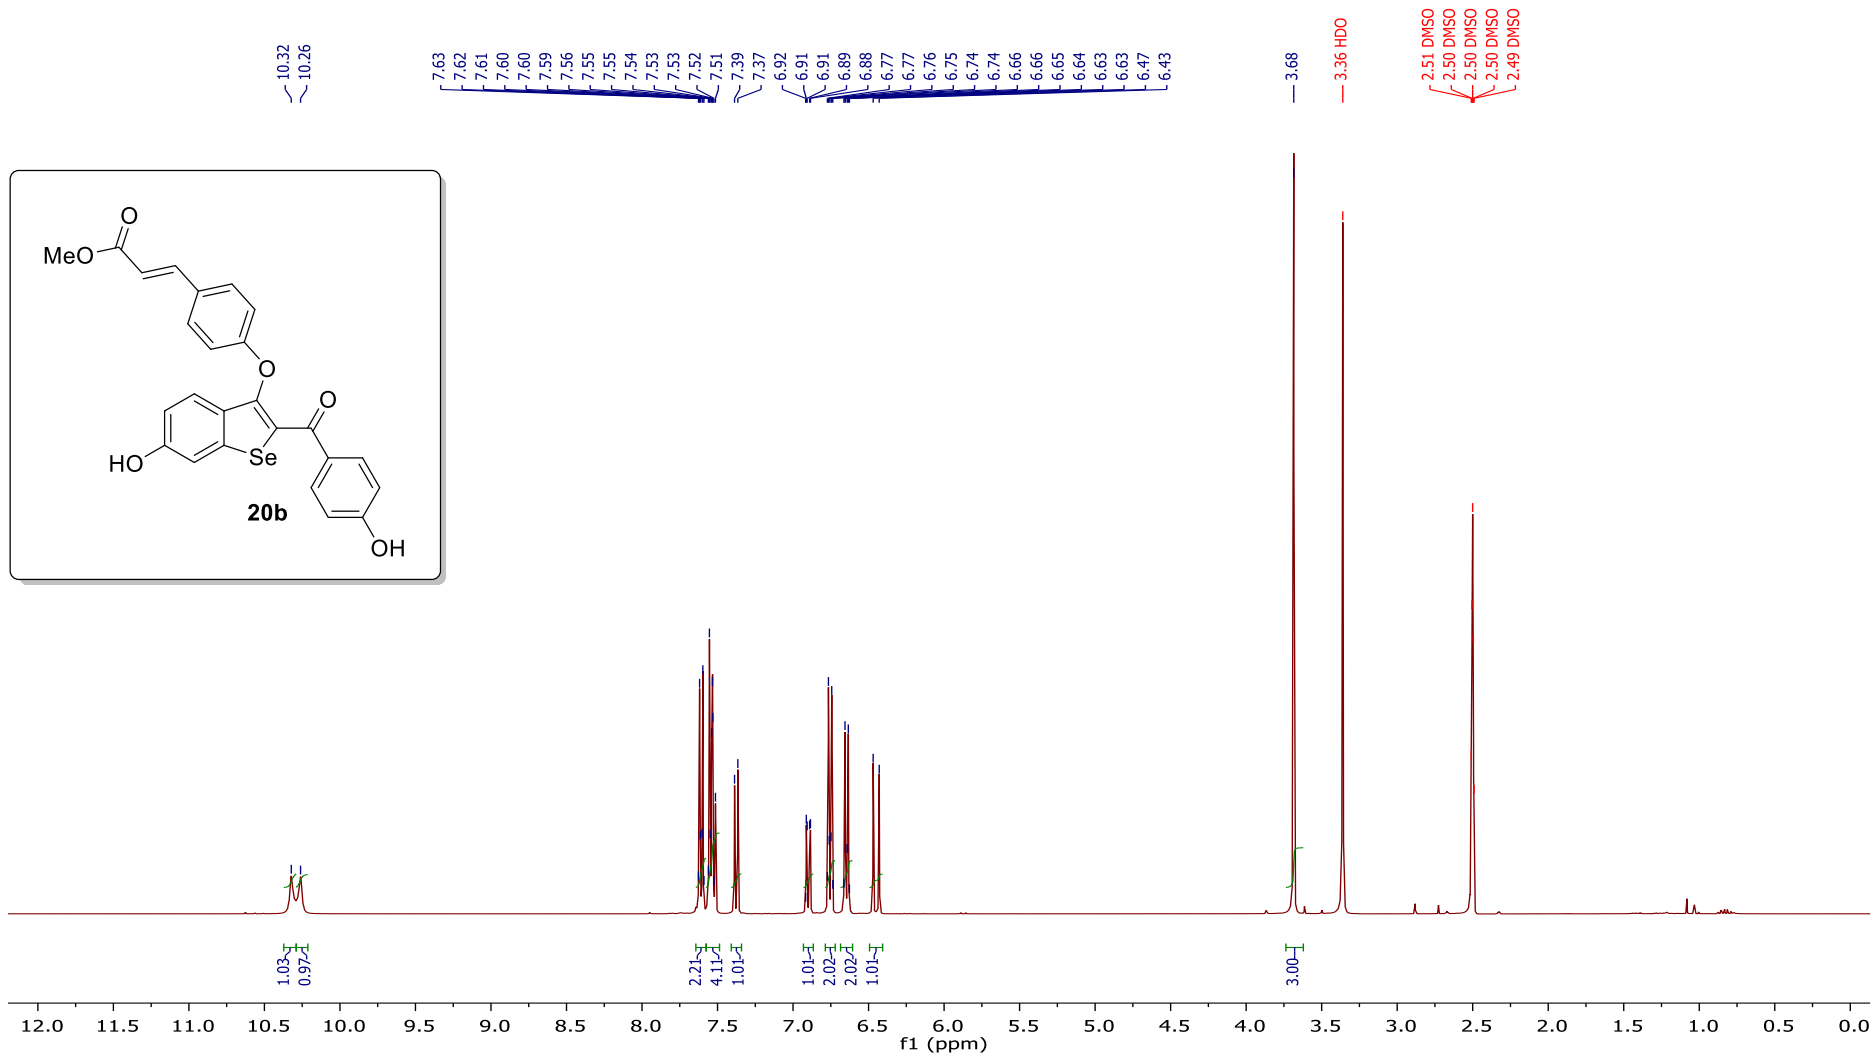

<sup>13</sup>C NMR (100.6 MHz, DMSO-d<sub>6</sub>):

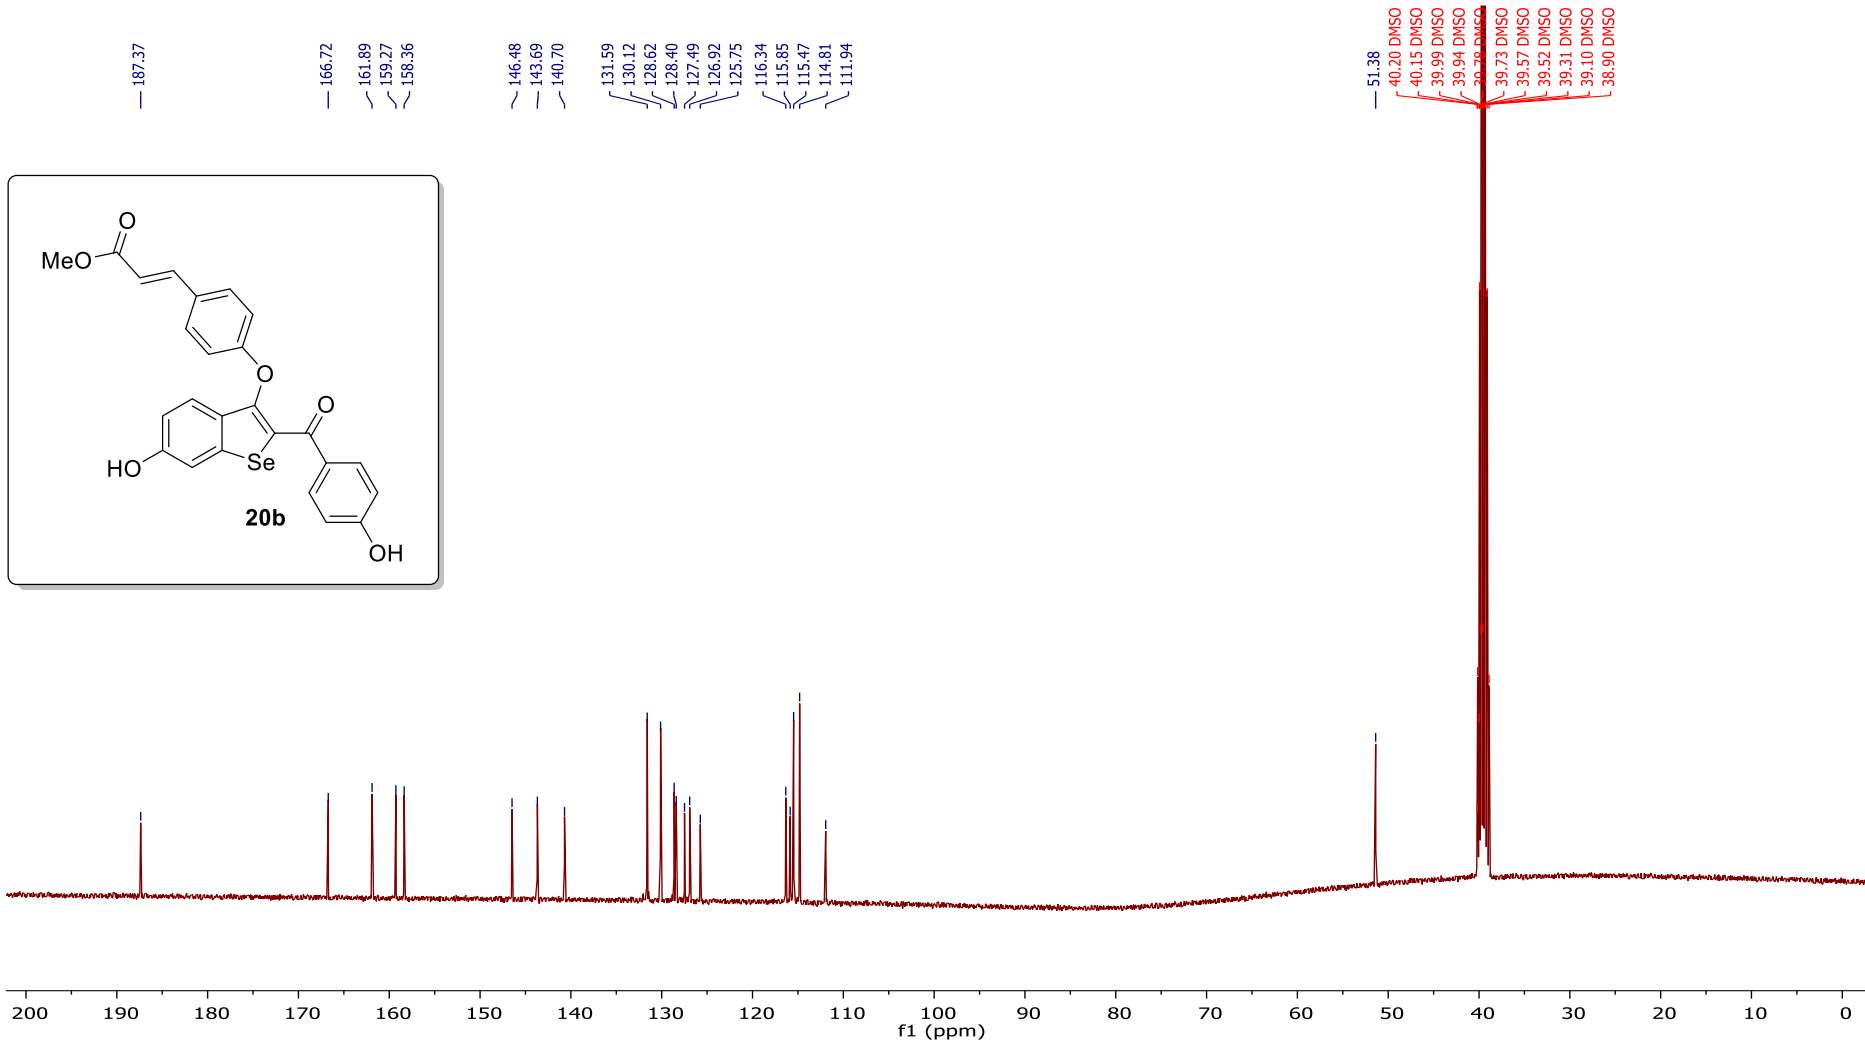

$^{77}\text{Se}$  NMR (76.37 MHz, DMSO- $d_6$ ):

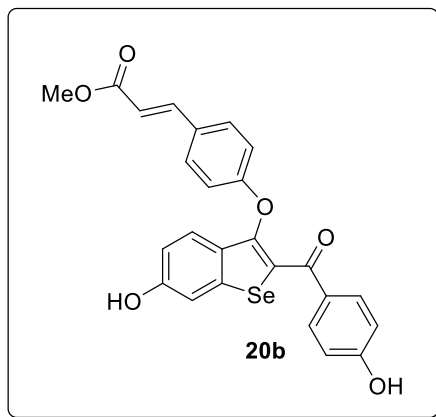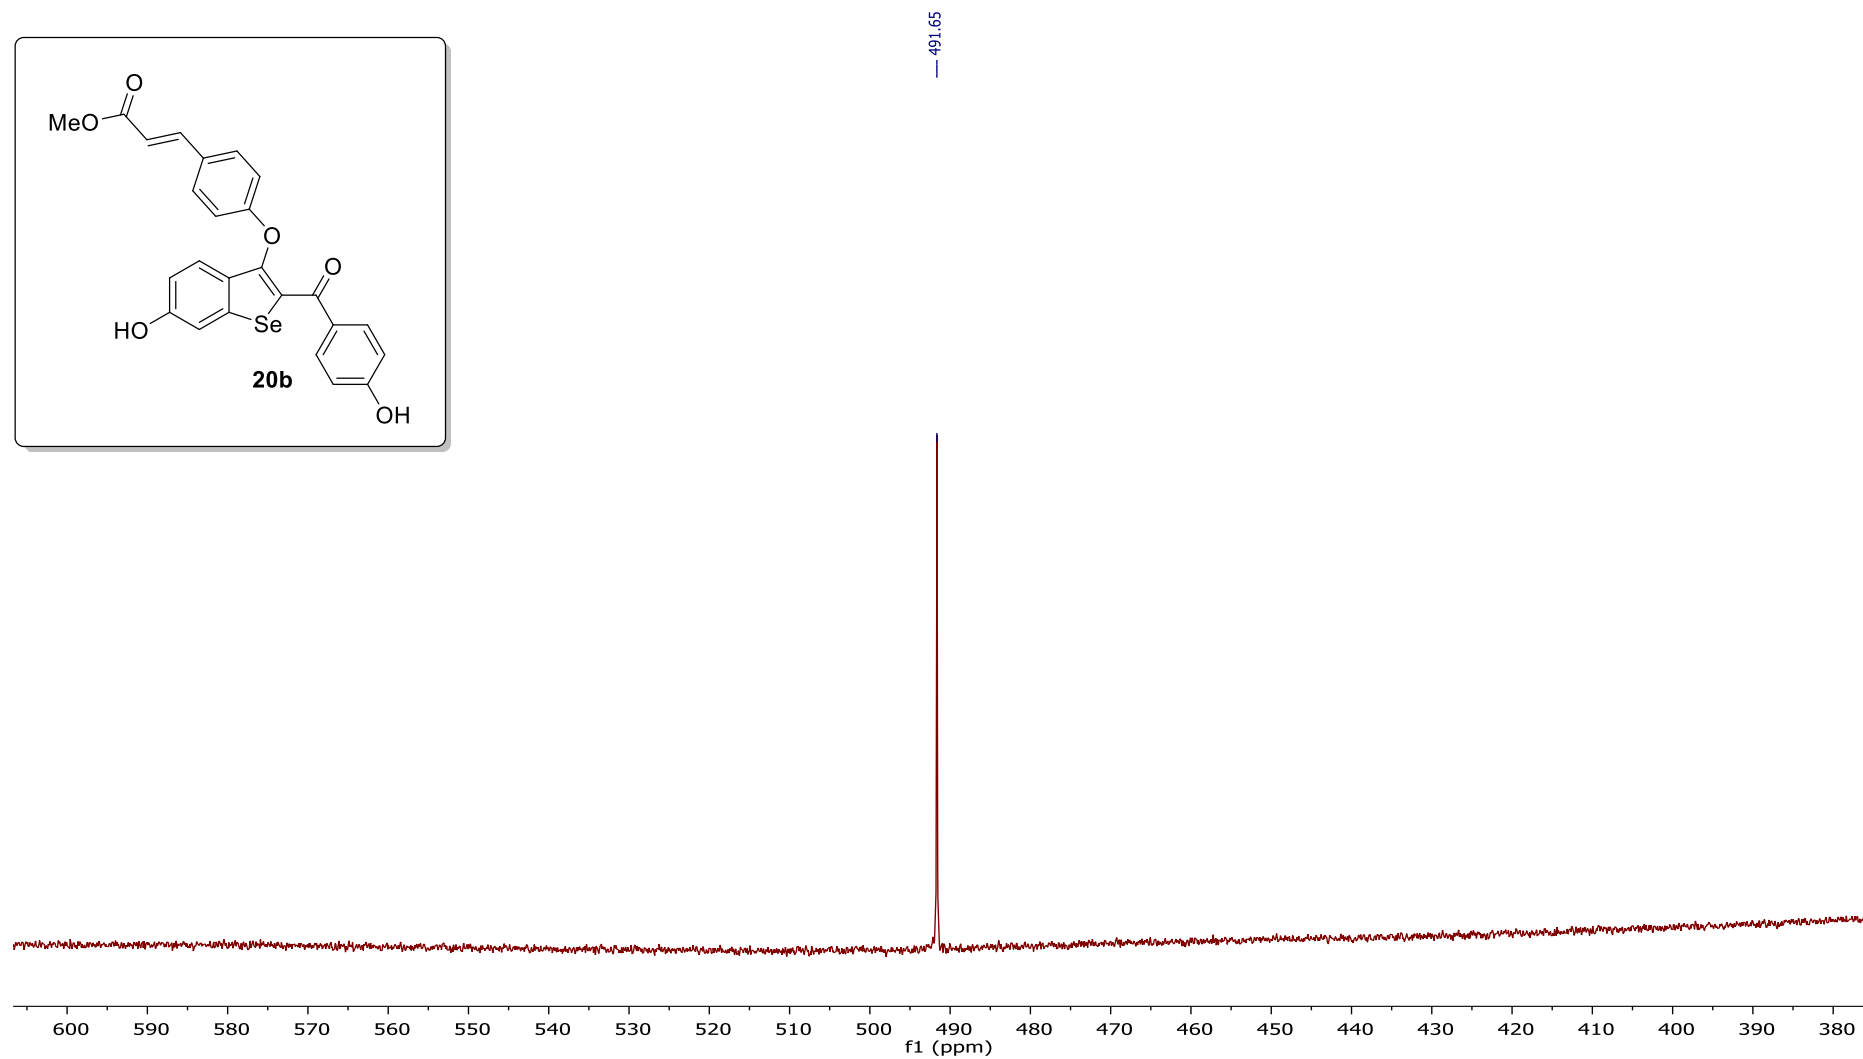

$^1\text{H}$  NMR (400 MHz, DMSO- $d_6$ ):

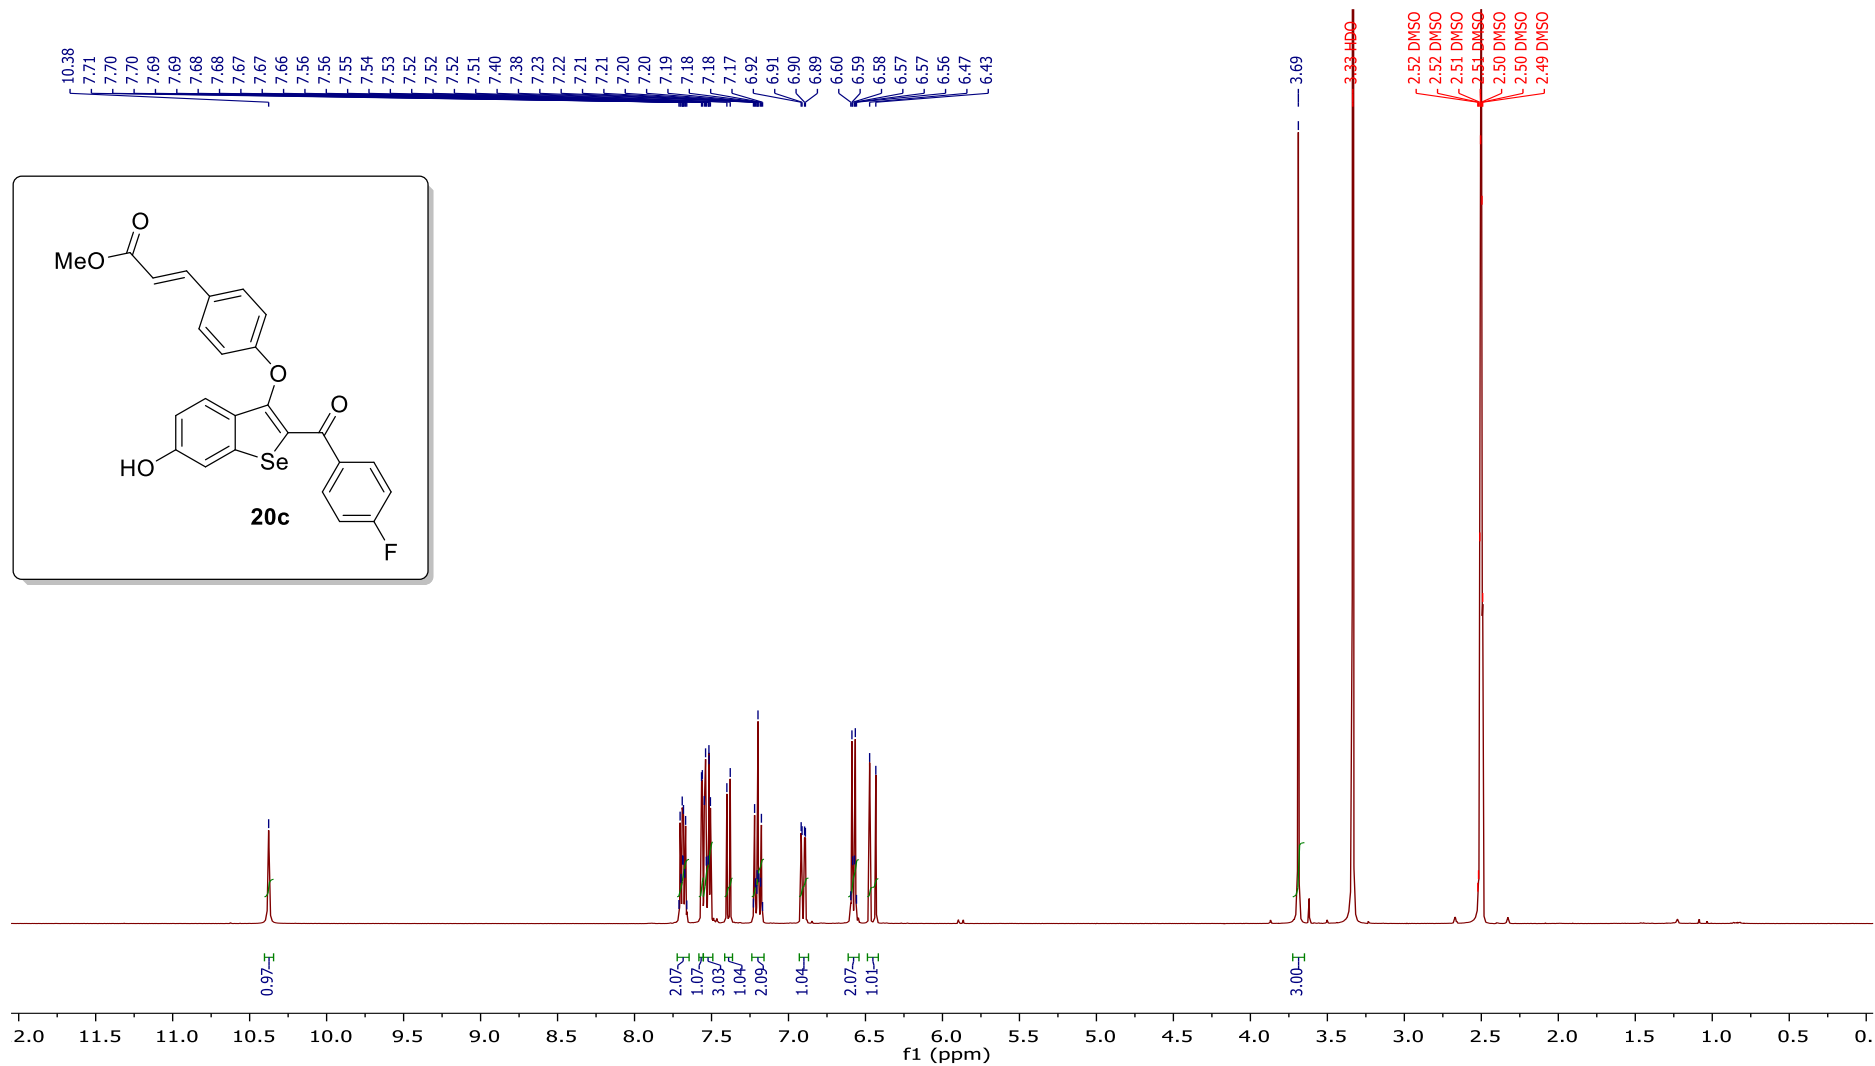

$^{13}\text{C}$  NMR (100.6 MHz, DMSO- $d_6$ ):

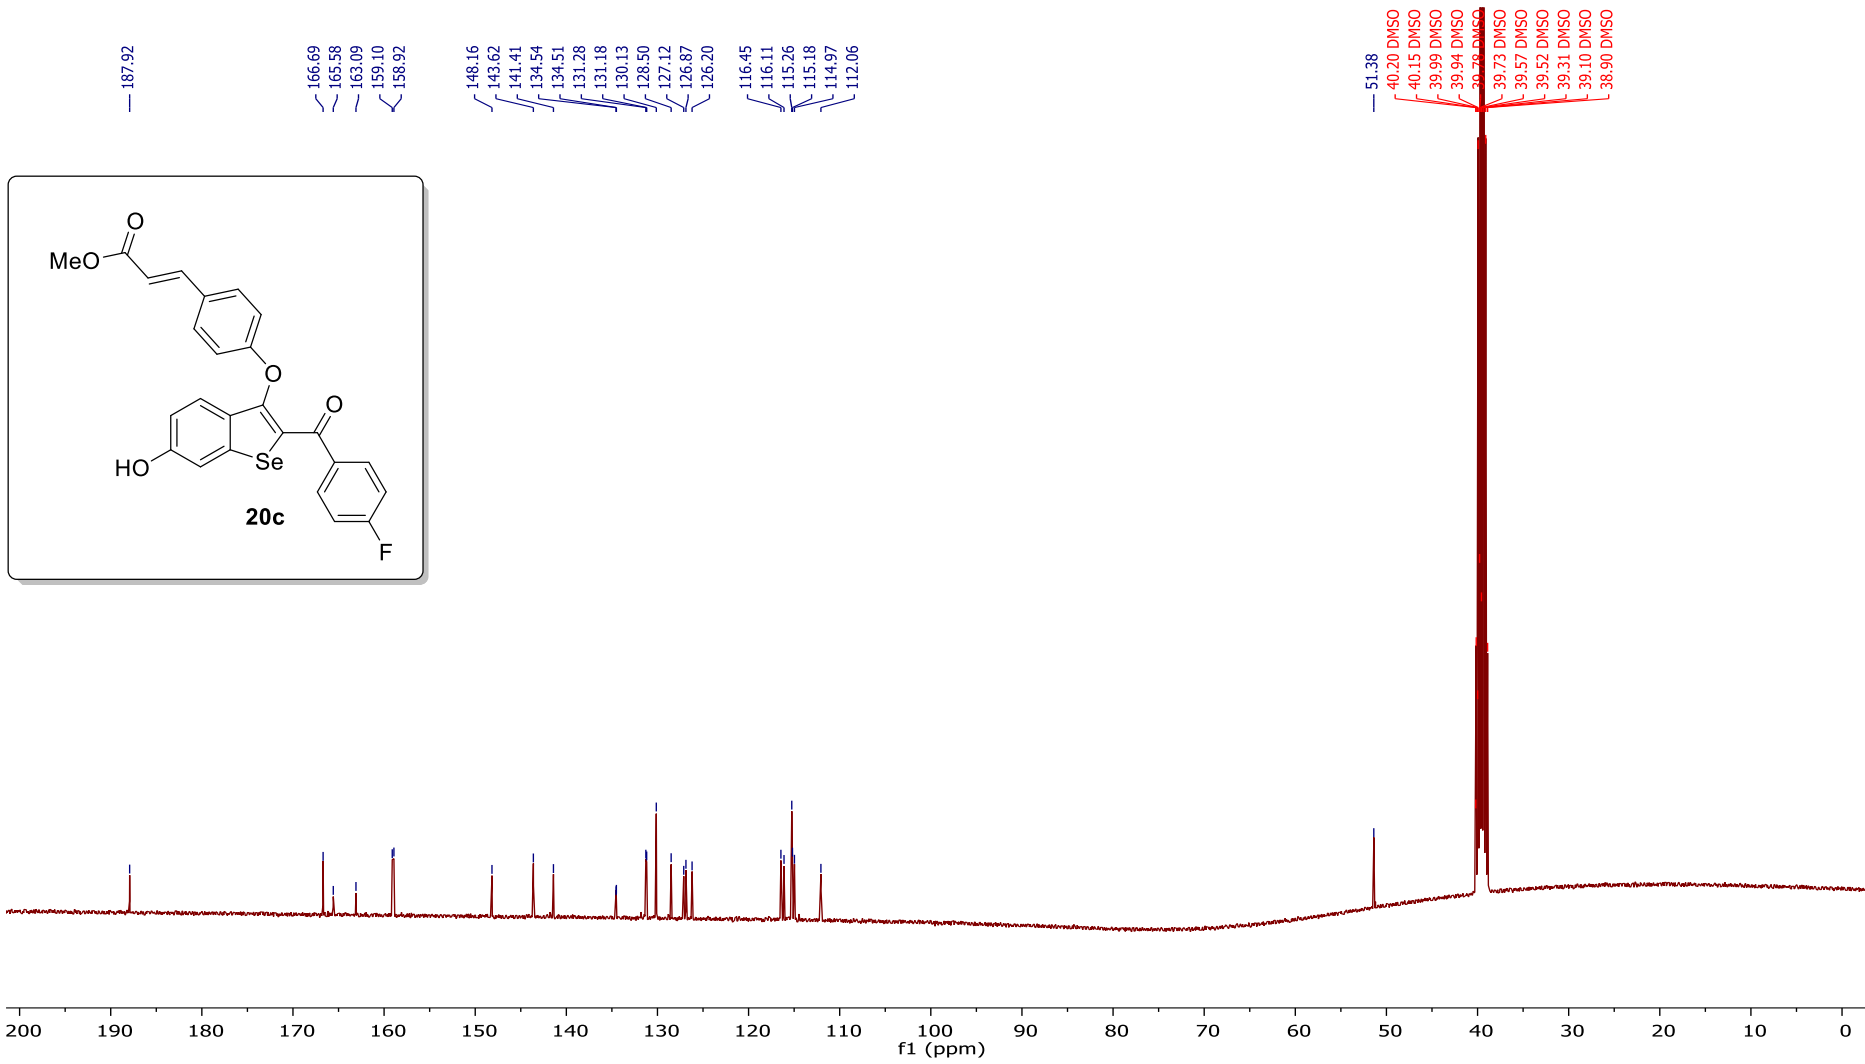

$^{19}\text{F}$  NMR (376.21 MHz, DMSO- $d_6$ ):

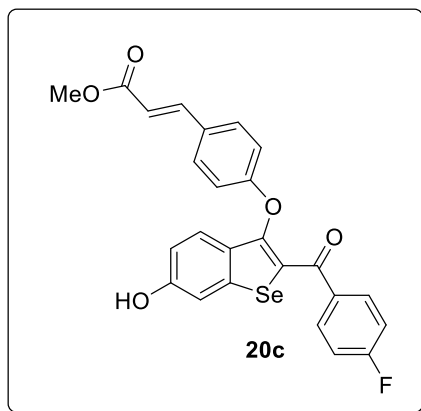

-106.98  
-107.00  
-107.01  
-107.02  
-107.04  
-107.05  
-107.06

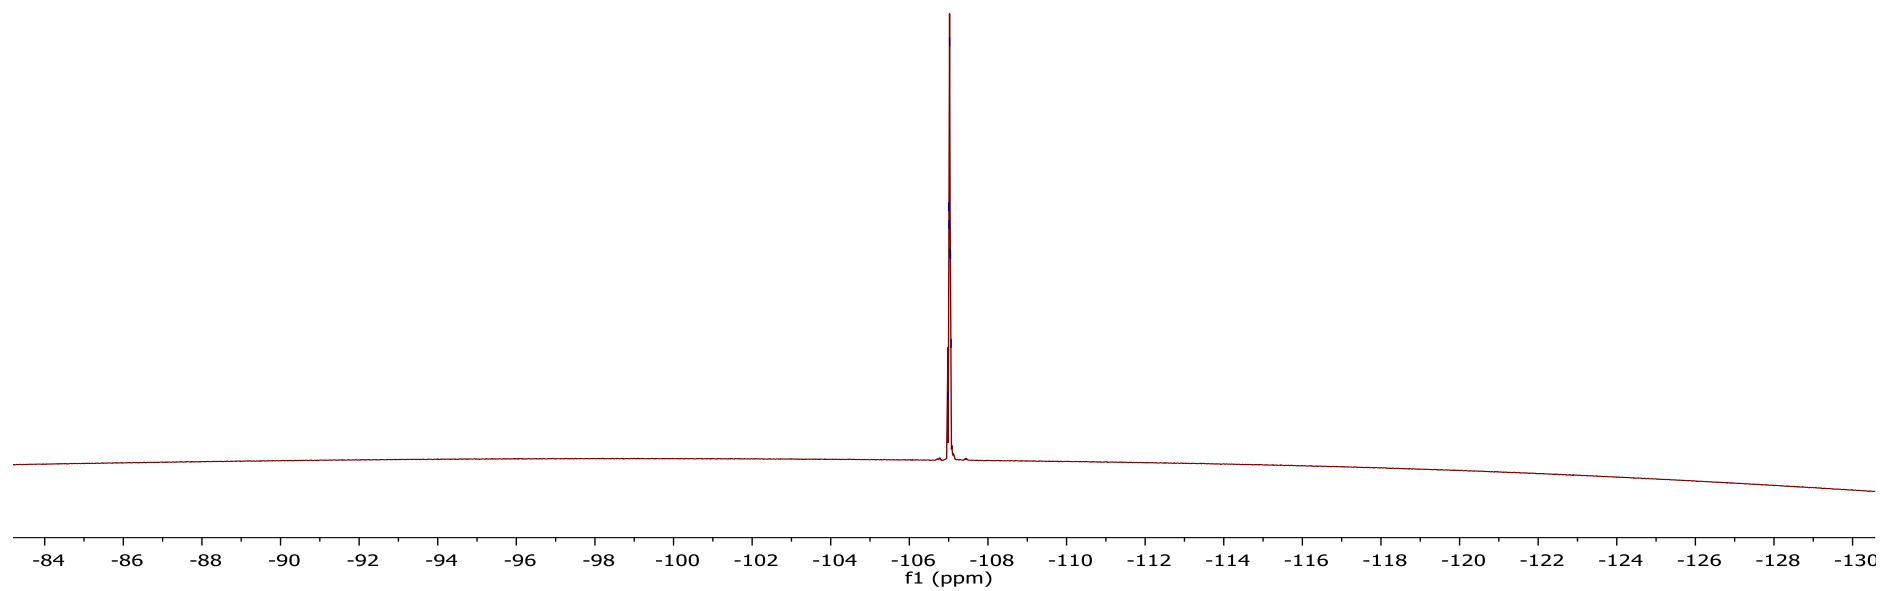



$^{77}\text{Se}$  NMR (76.37 MHz, DMSO- $d_6$ ):

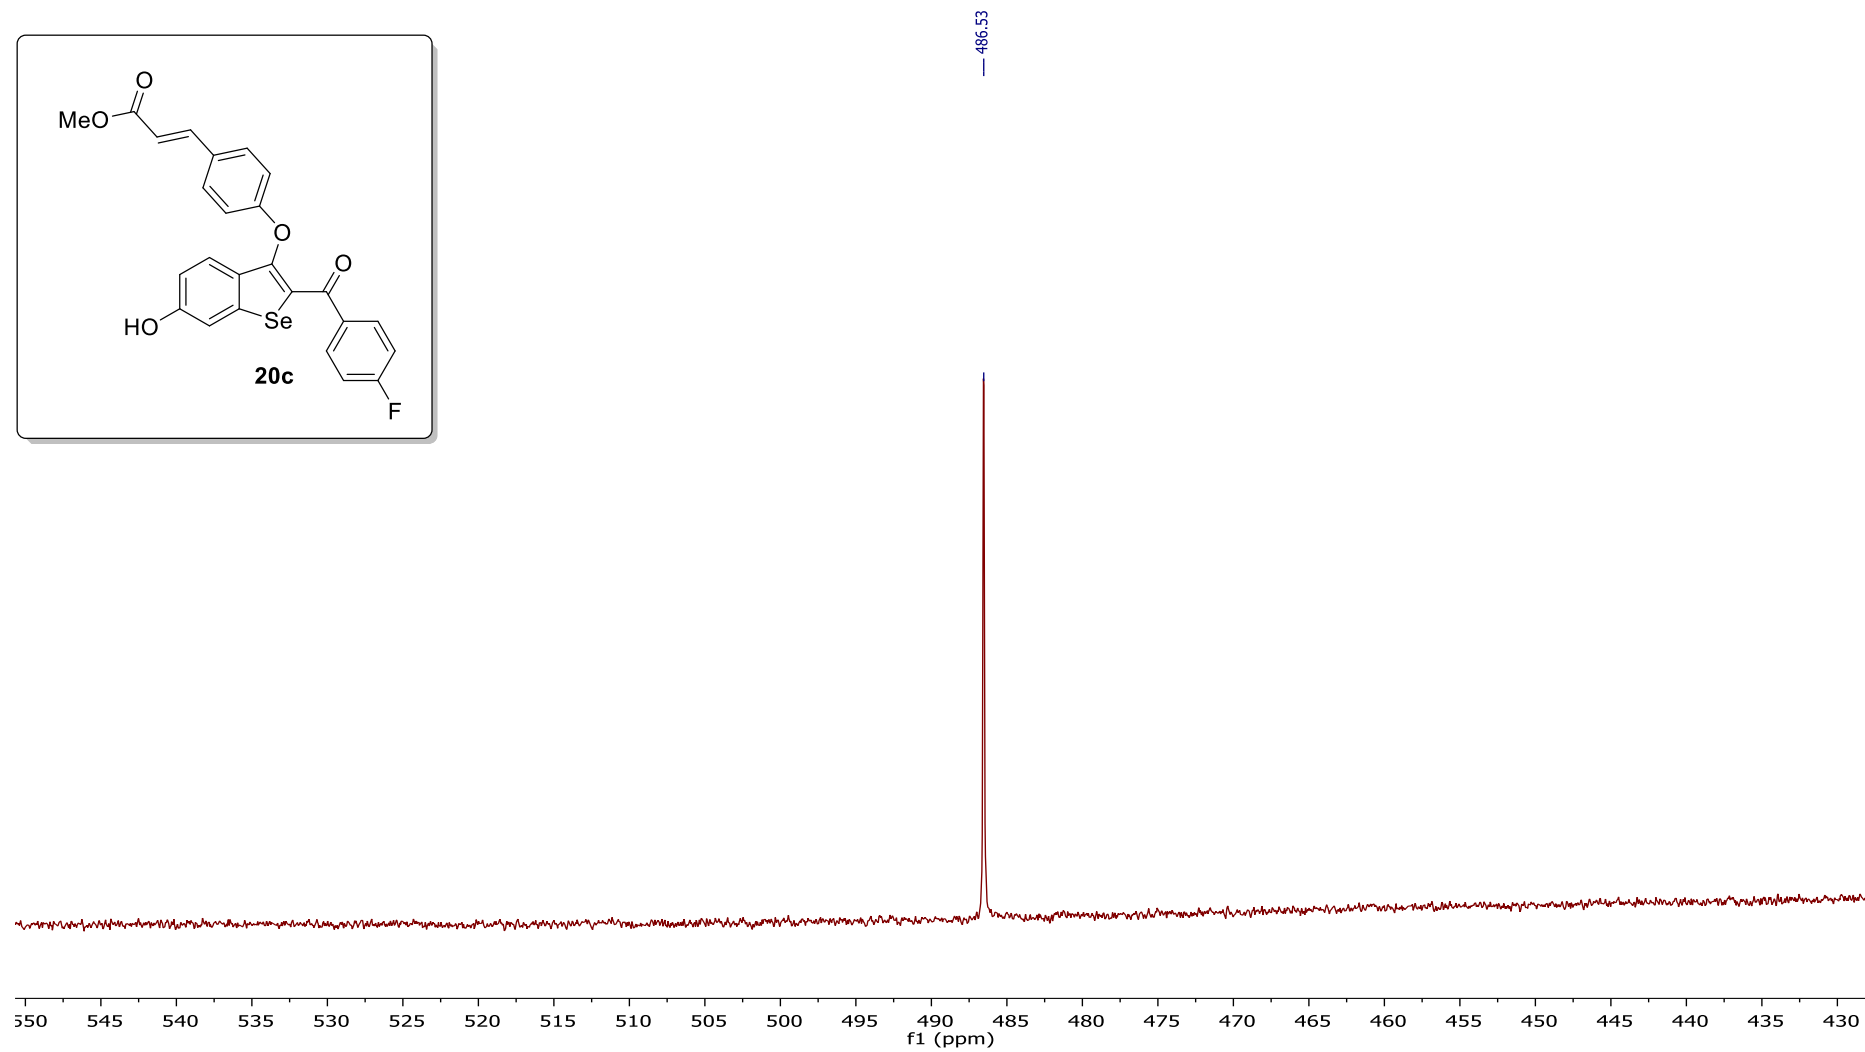

$^1\text{H}$  NMR (400 MHz,  $\text{CDCl}_3$ ):

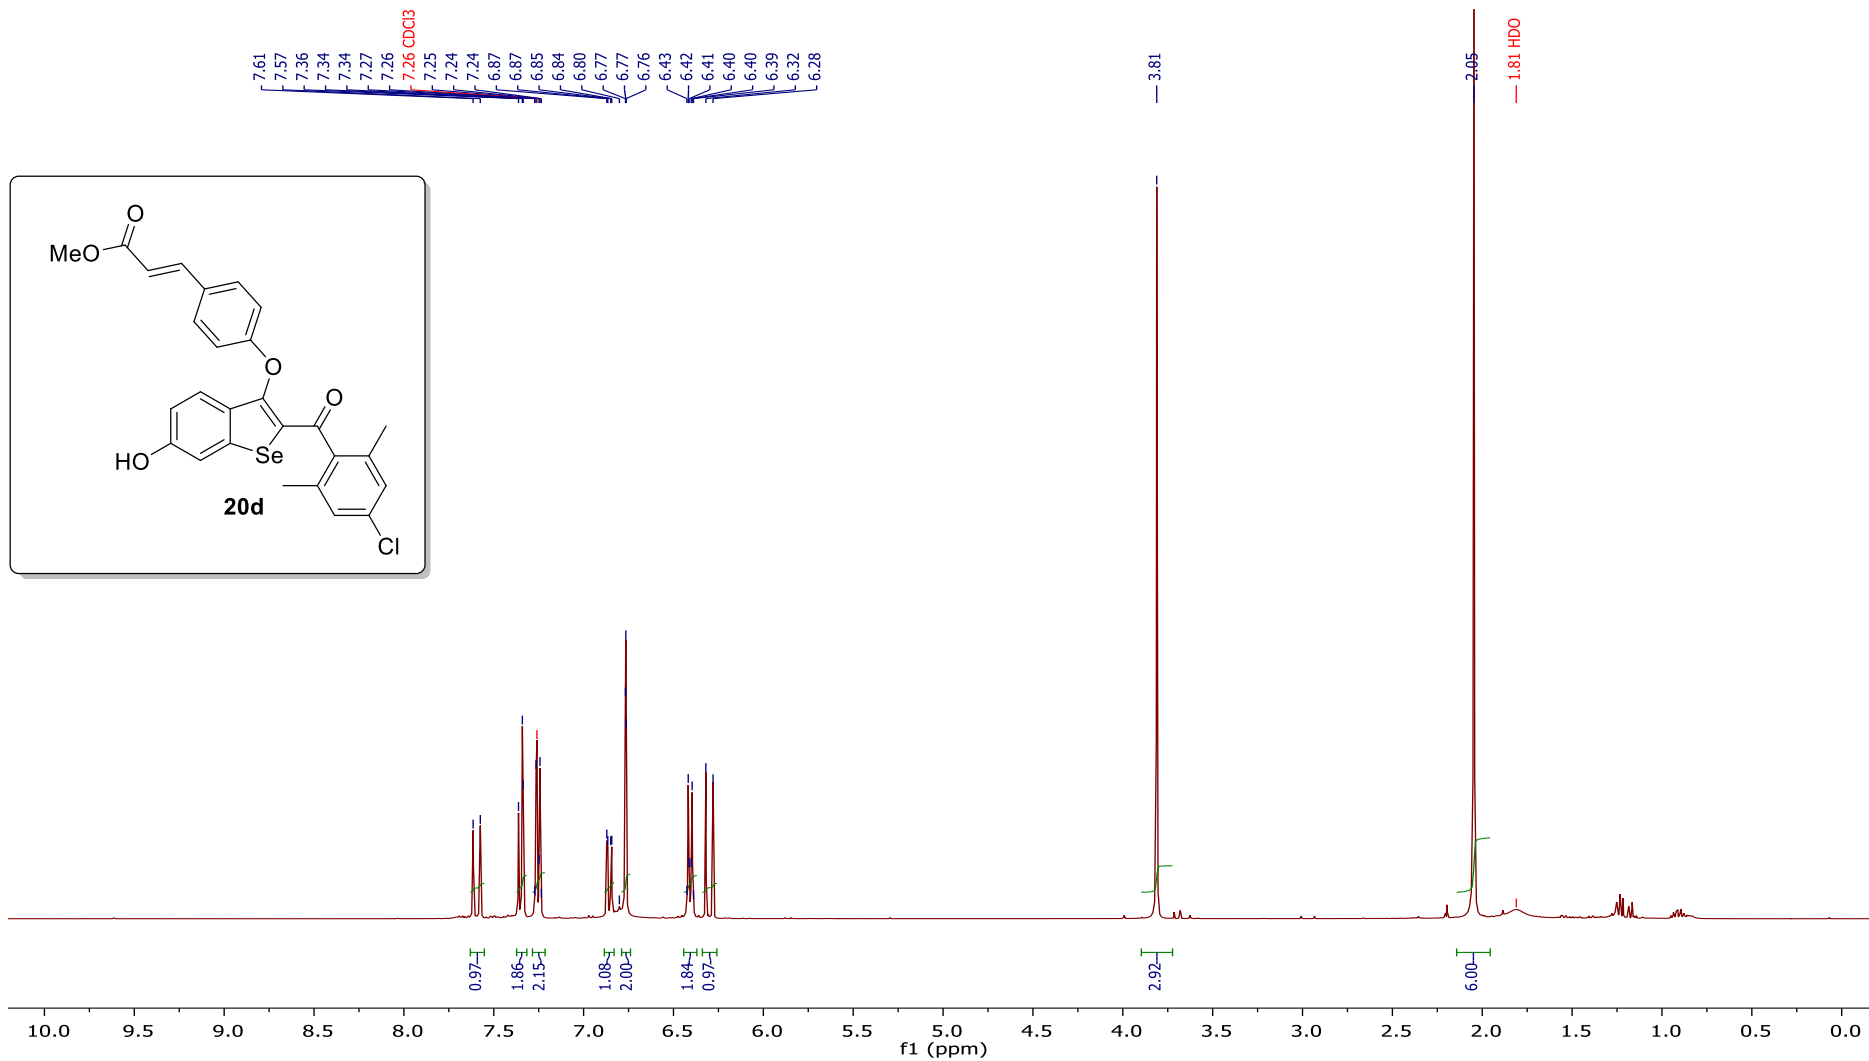

$^{13}\text{C}$  NMR (100.6 MHz,  $\text{CDCl}_3$ ):

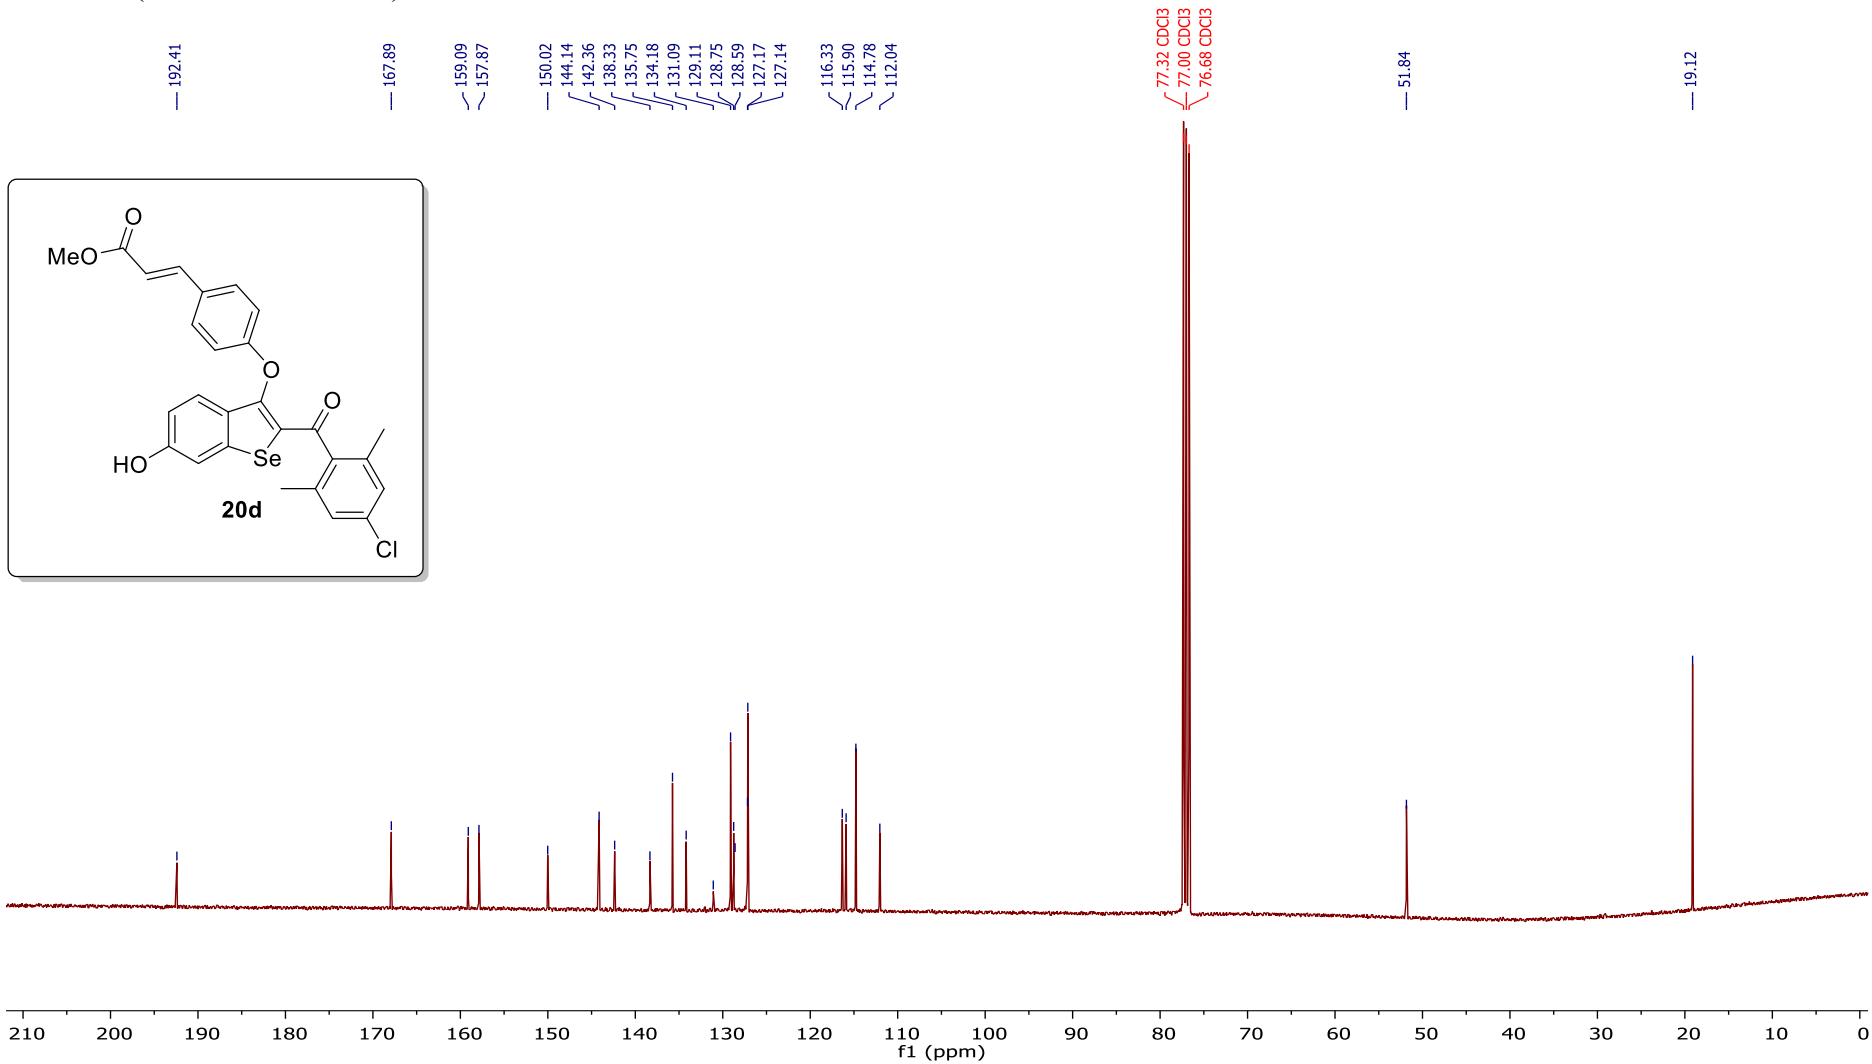

$^{77}\text{Se}$  NMR (76.37 MHz,  $\text{CDCl}_3$ ):

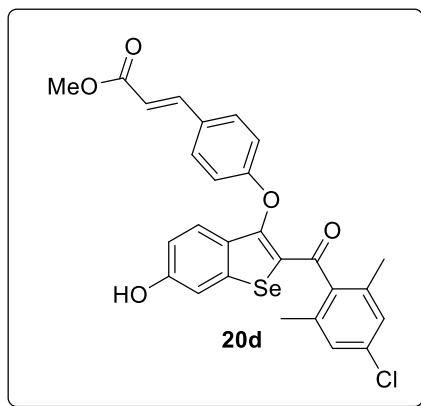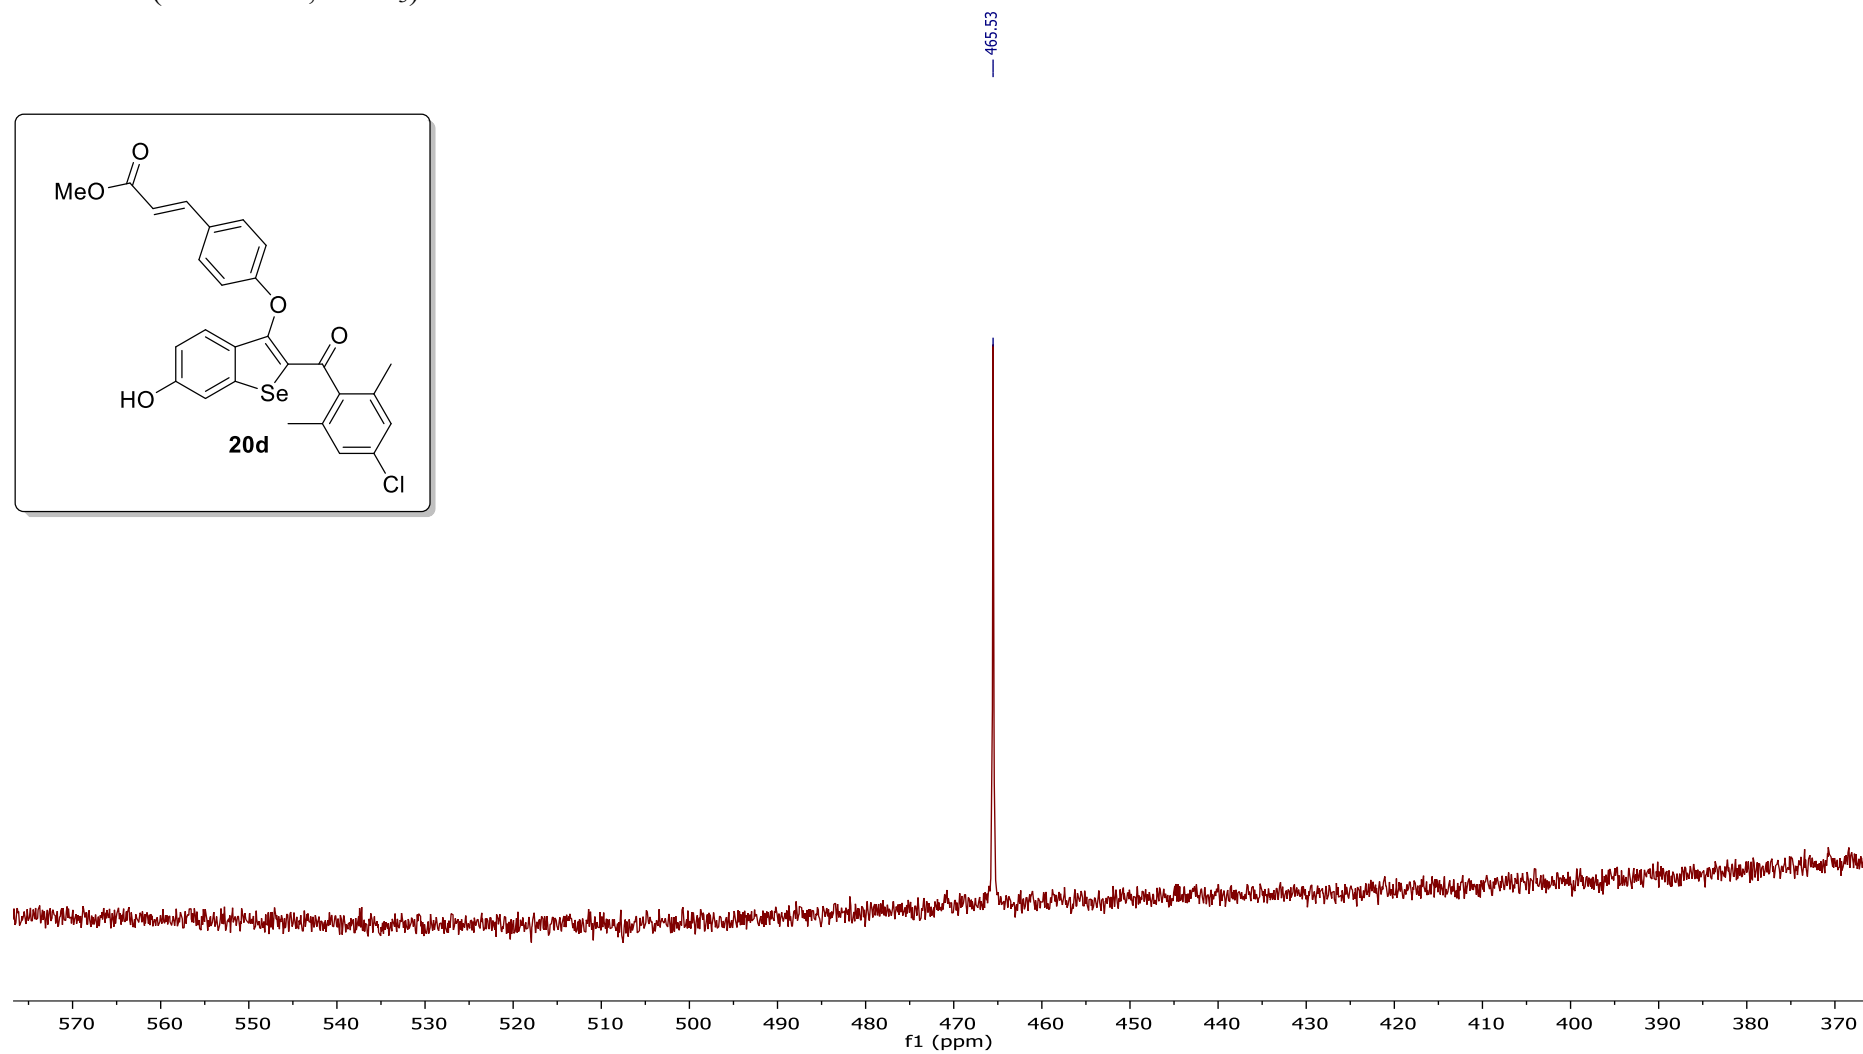

$^1\text{H}$  NMR (400 MHz, DMSO- $d_6$ ):

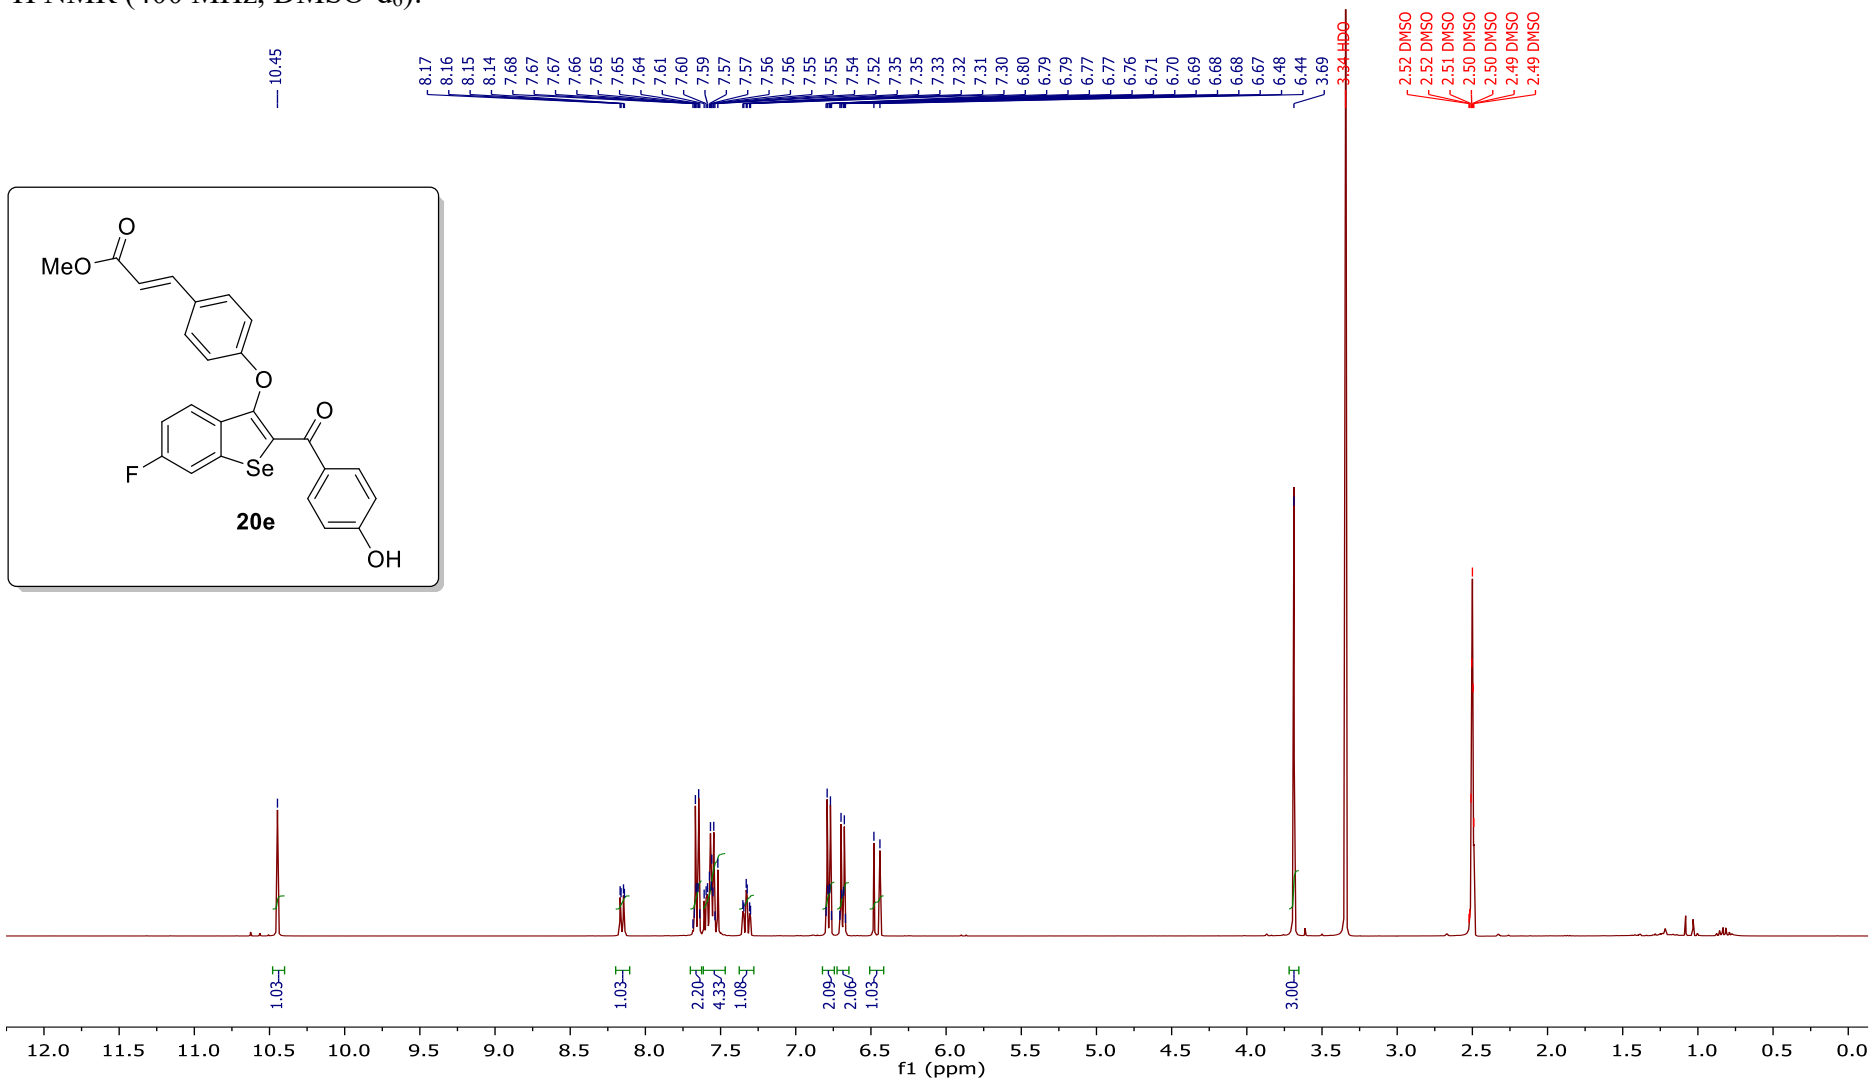

$^{13}\text{C}$  NMR (100.6 MHz, DMSO- $d_6$ ):

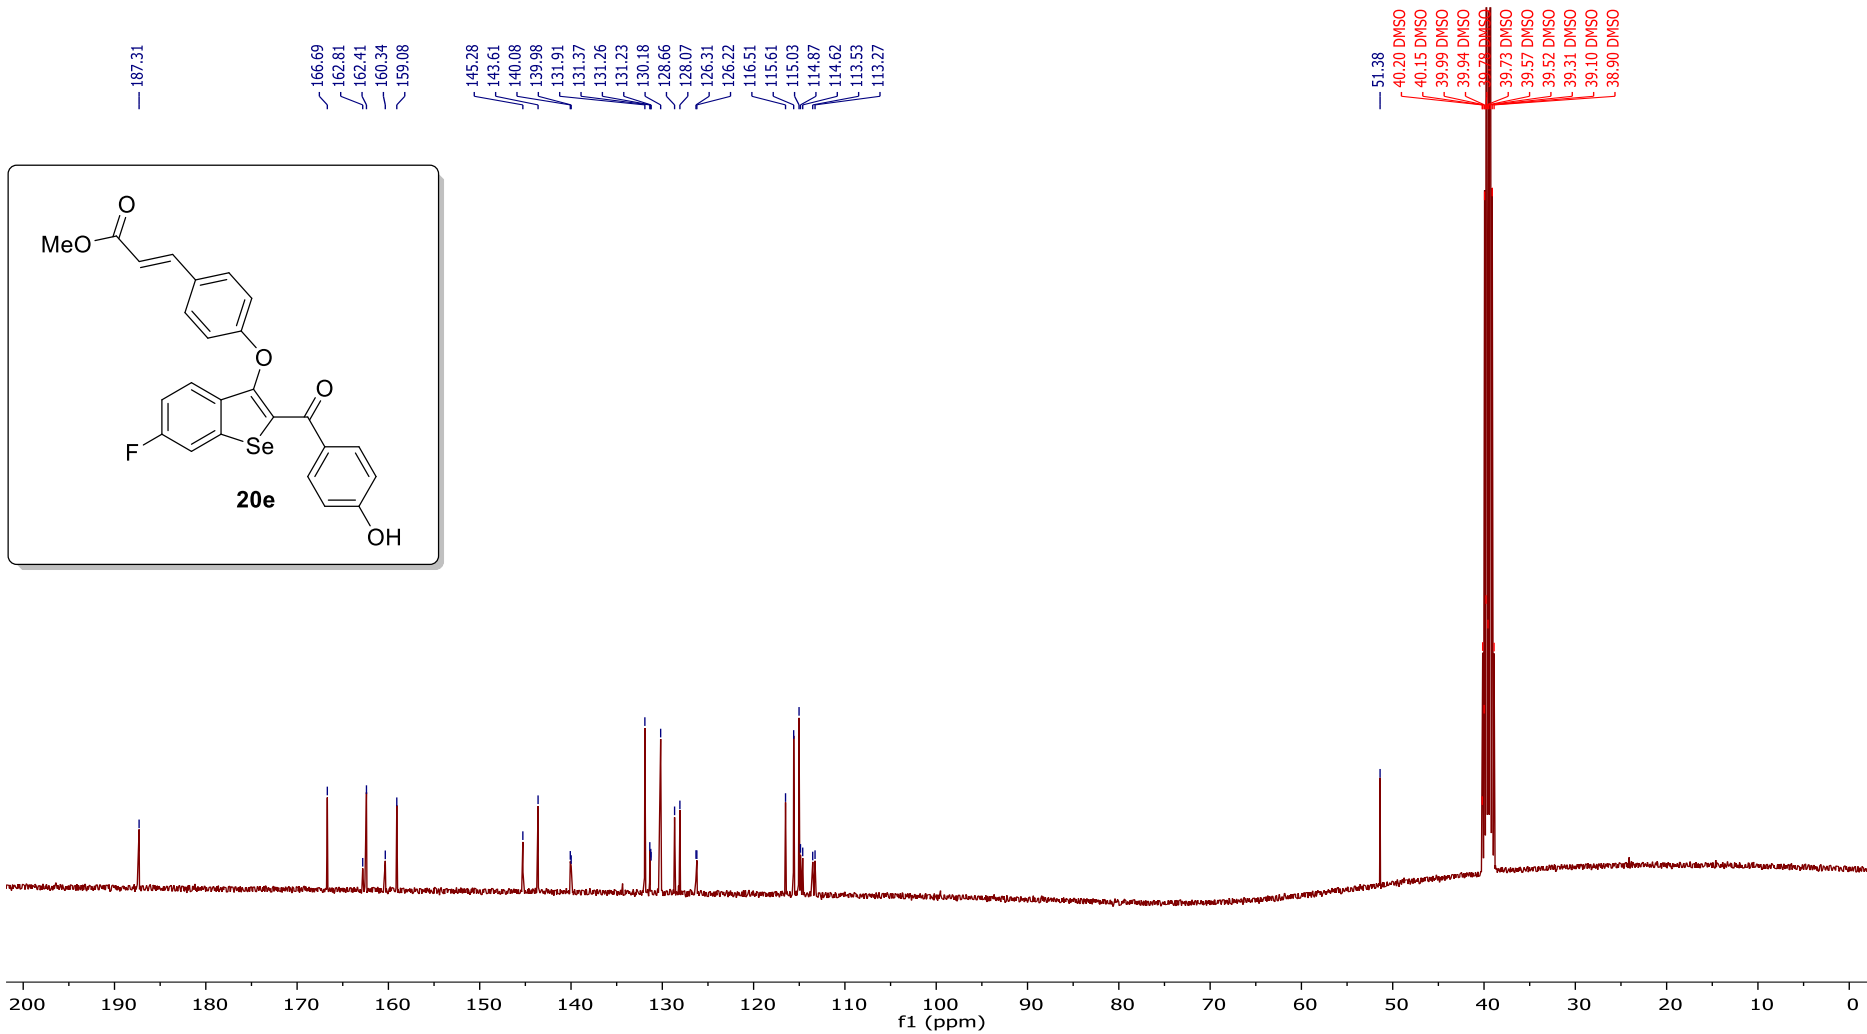

$^{19}\text{F}$  NMR (376.21 MHz,  $\text{DMSO-d}_6$ ):

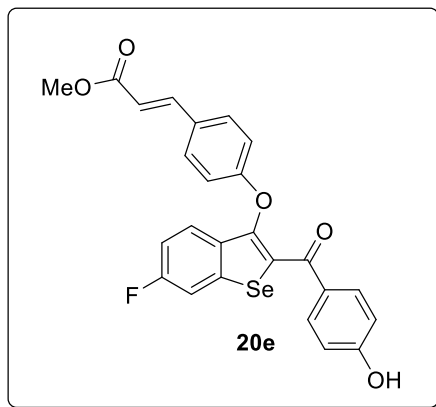

-110.83  
-110.84  
-110.85  
-110.86  
-110.87  
-110.89

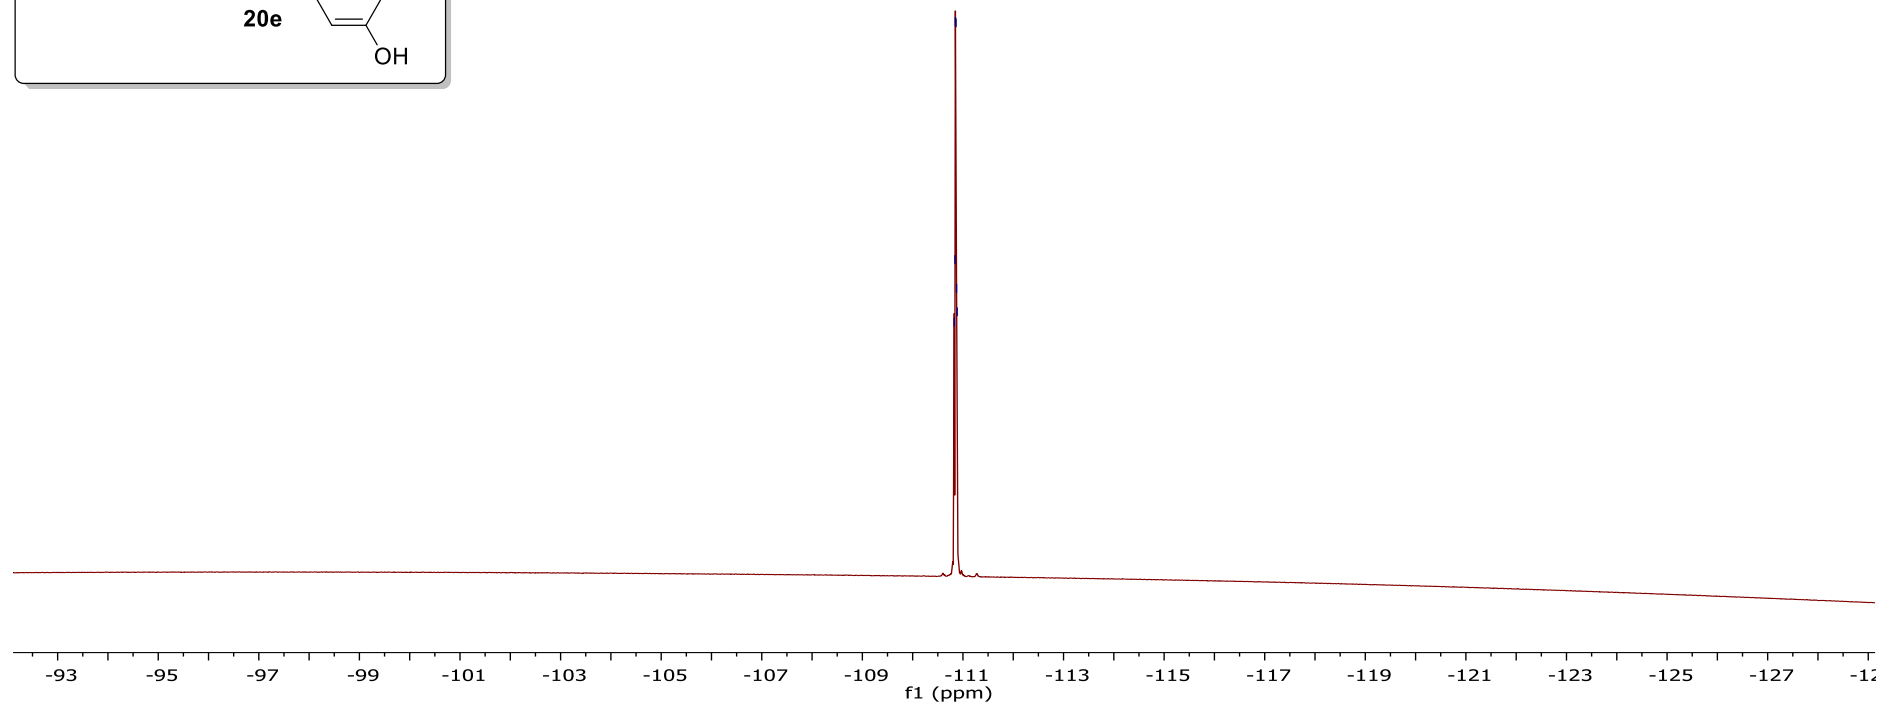

$^{77}\text{Se}$  NMR (76.37 MHz, DMSO- $d_6$ ):

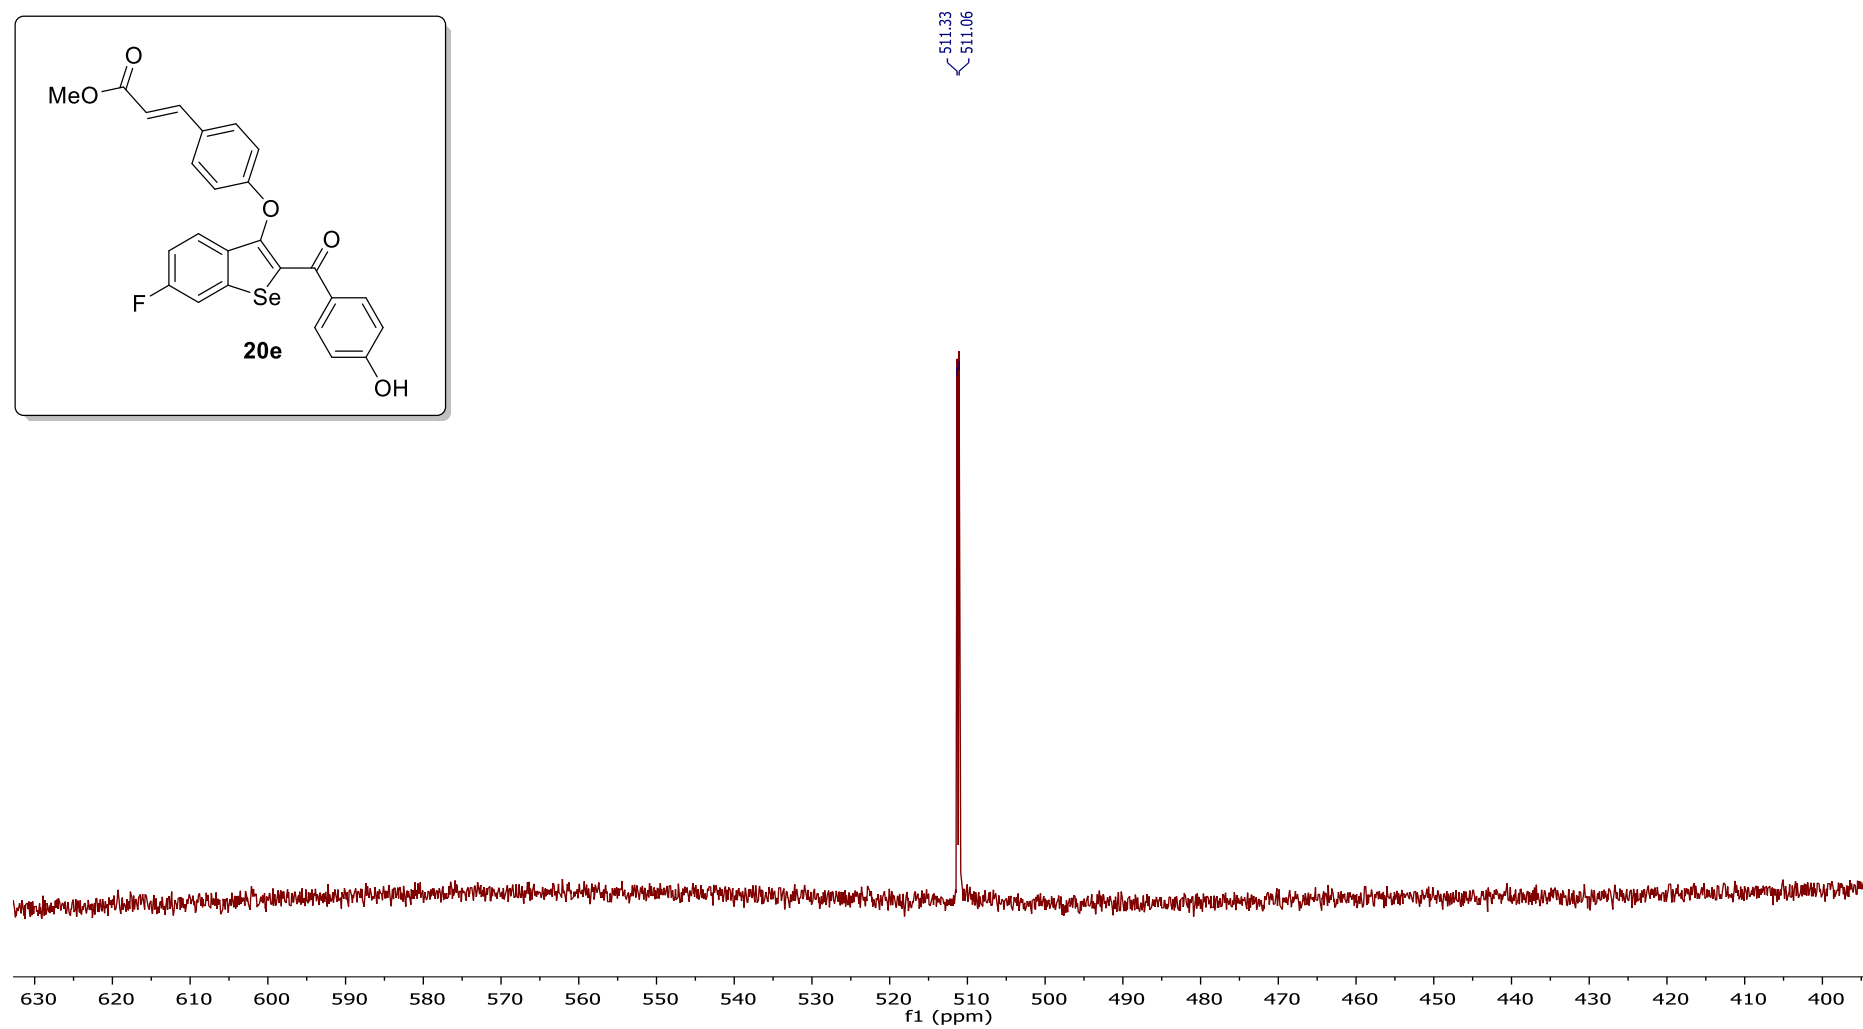



$^1\text{H}$  NMR (400 MHz, DMSO- $d_6$ ):

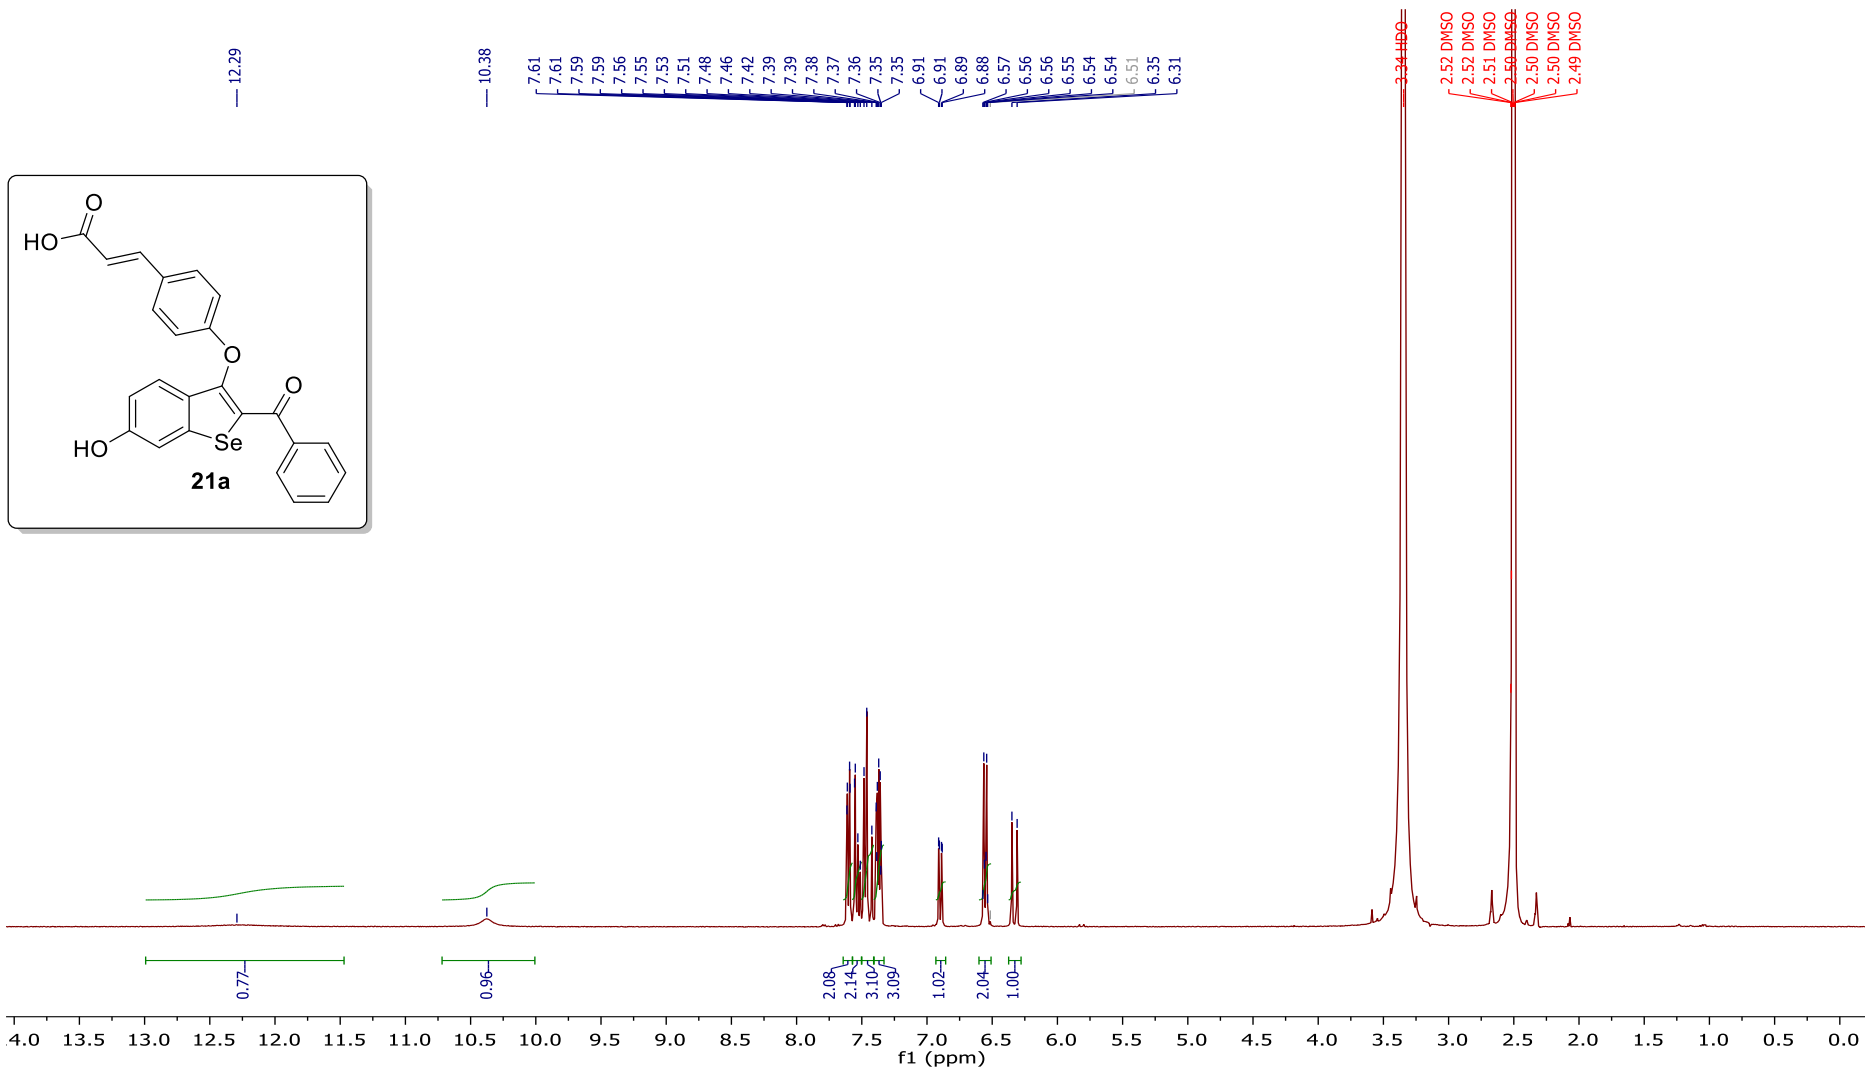

$^{13}\text{C}$  NMR (100.6 MHz, DMSO- $d_6$ ):

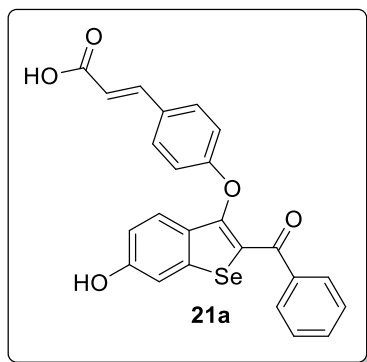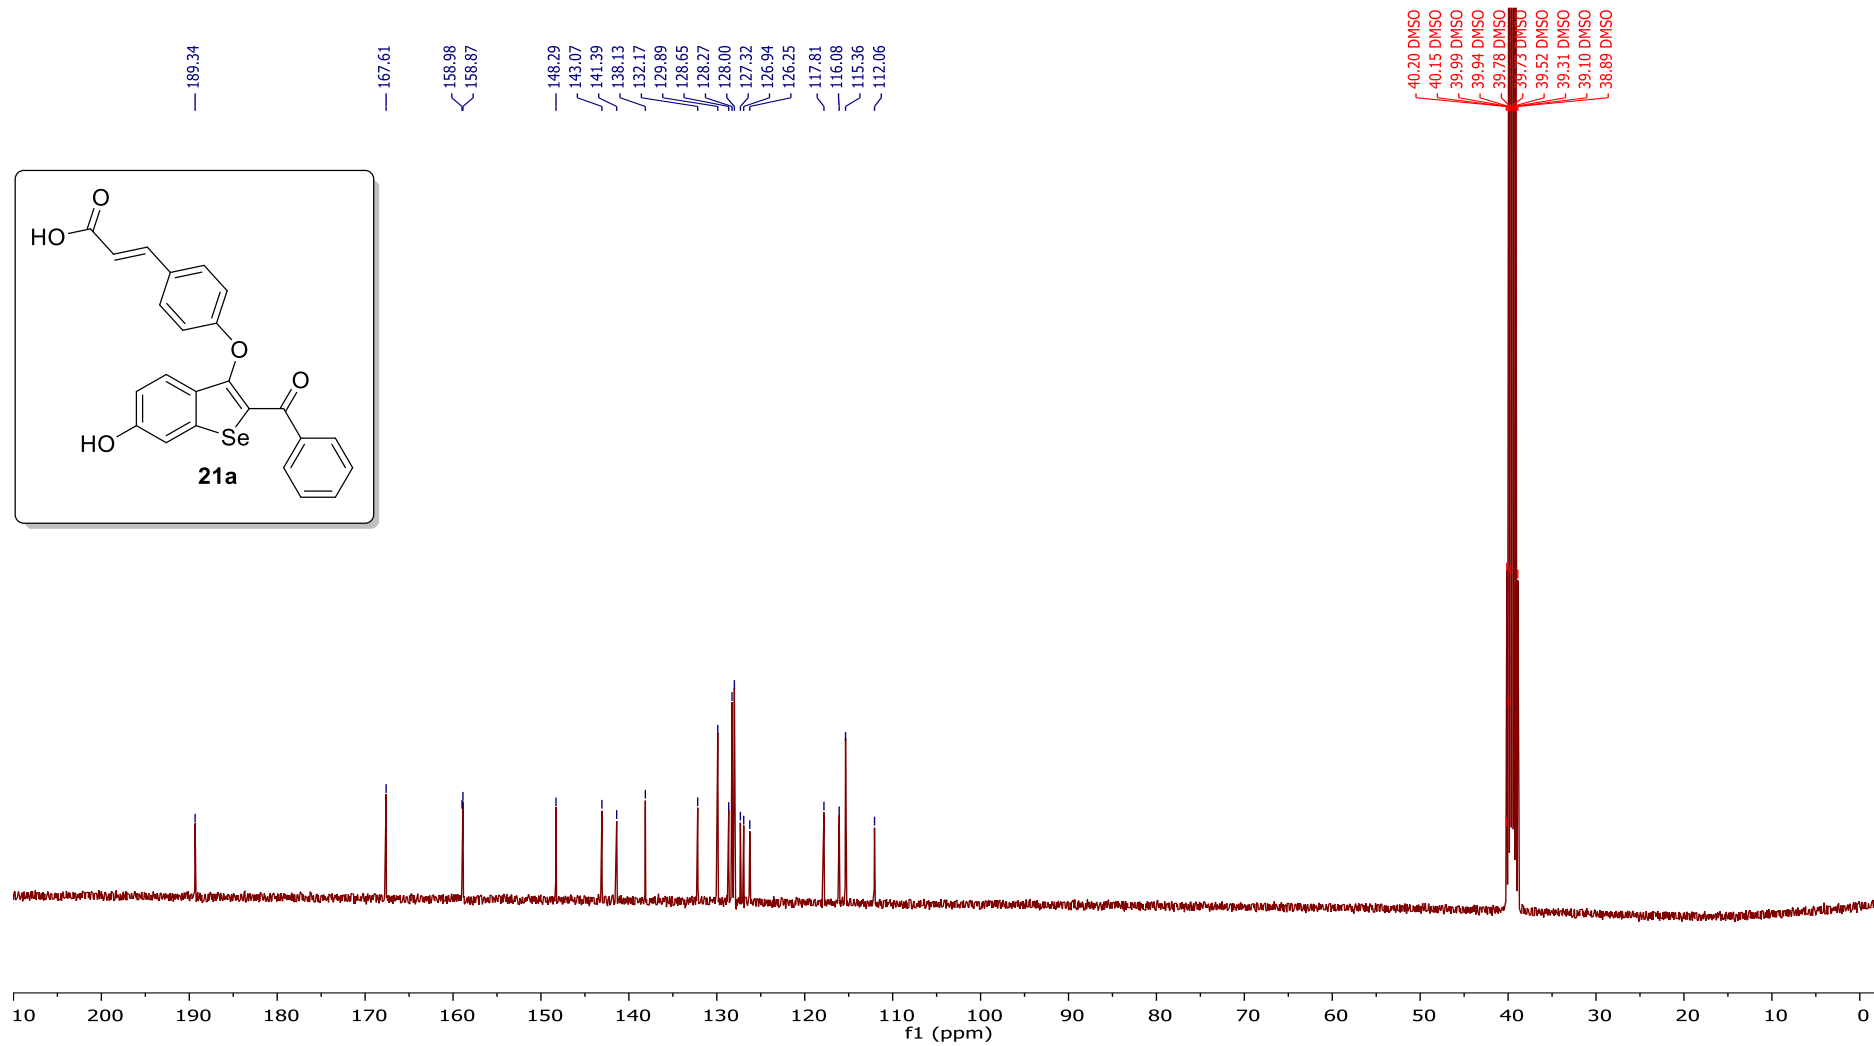

$^{77}\text{Se}$  NMR (76.37 MHz, DMSO- $d_6$ ):

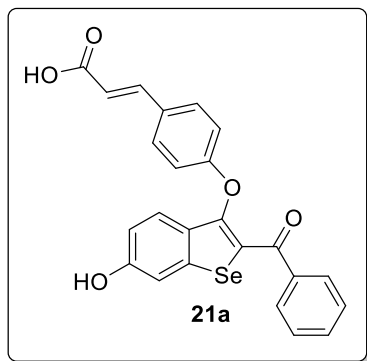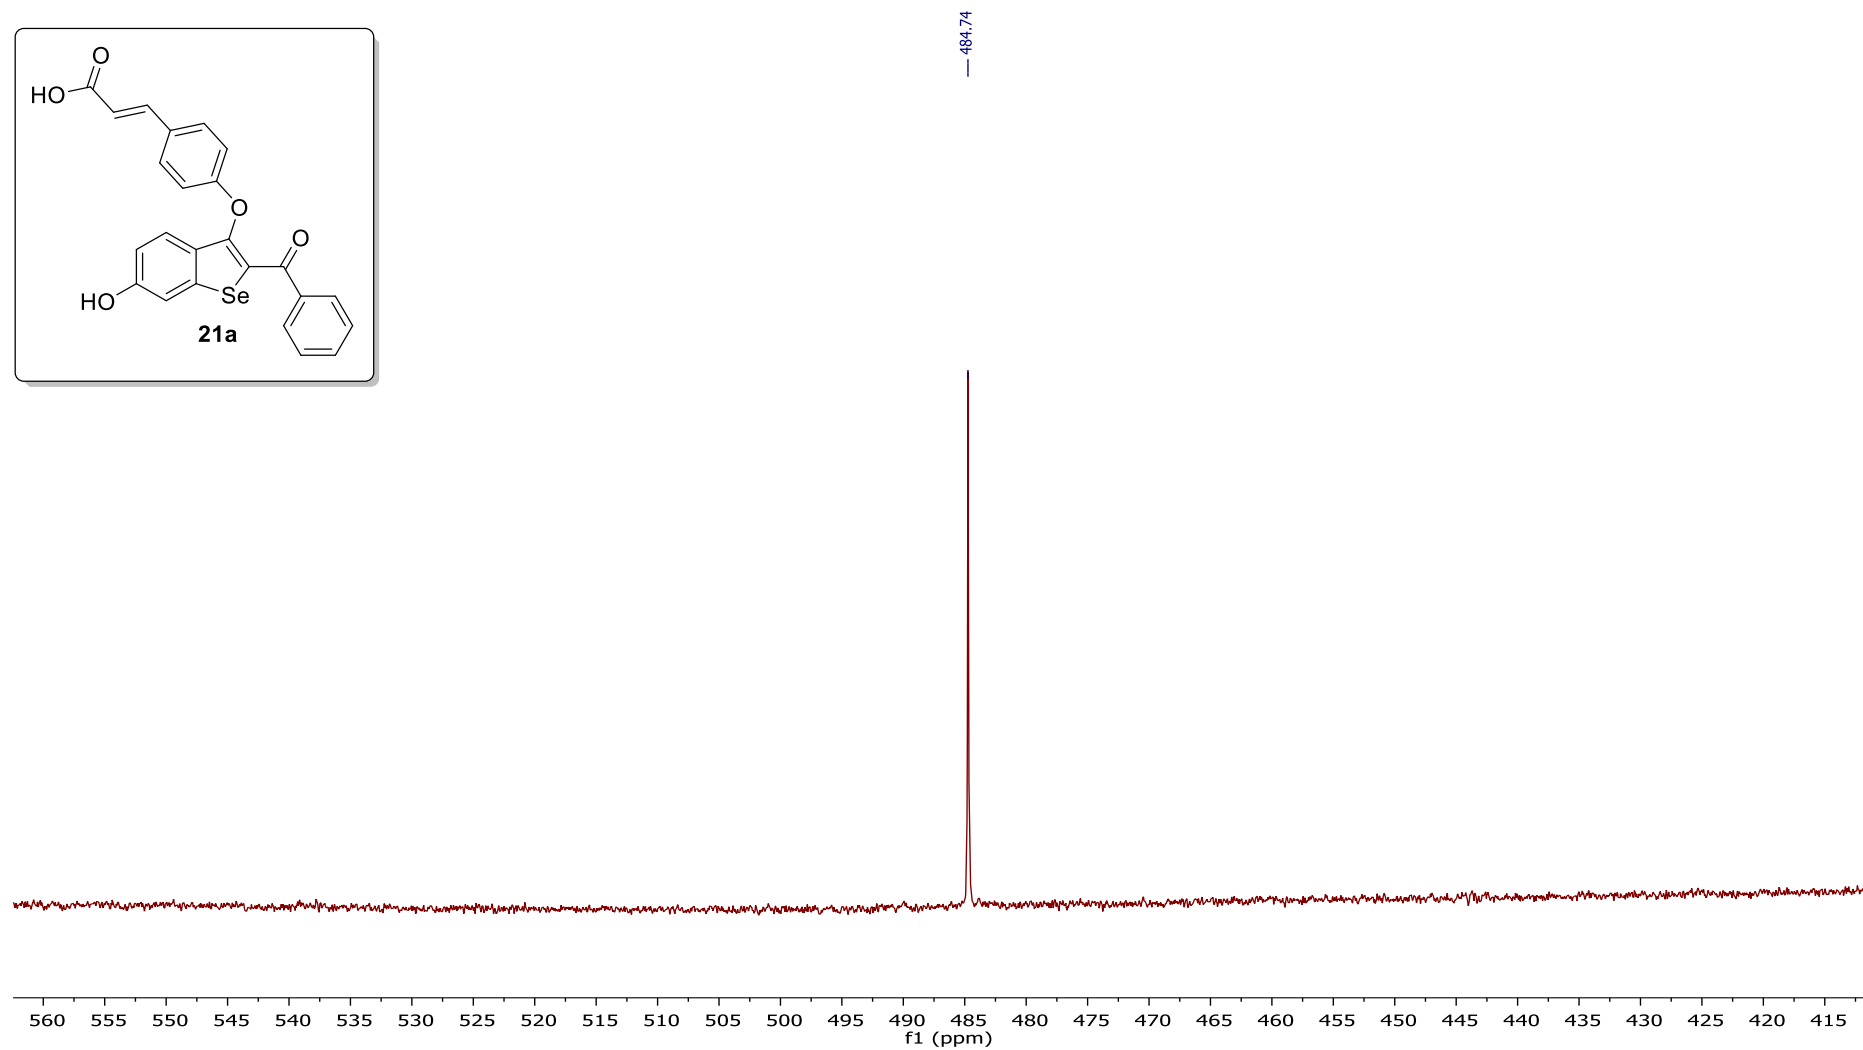

$^1\text{H}$  NMR (400 MHz, DMSO- $d_6$ ):

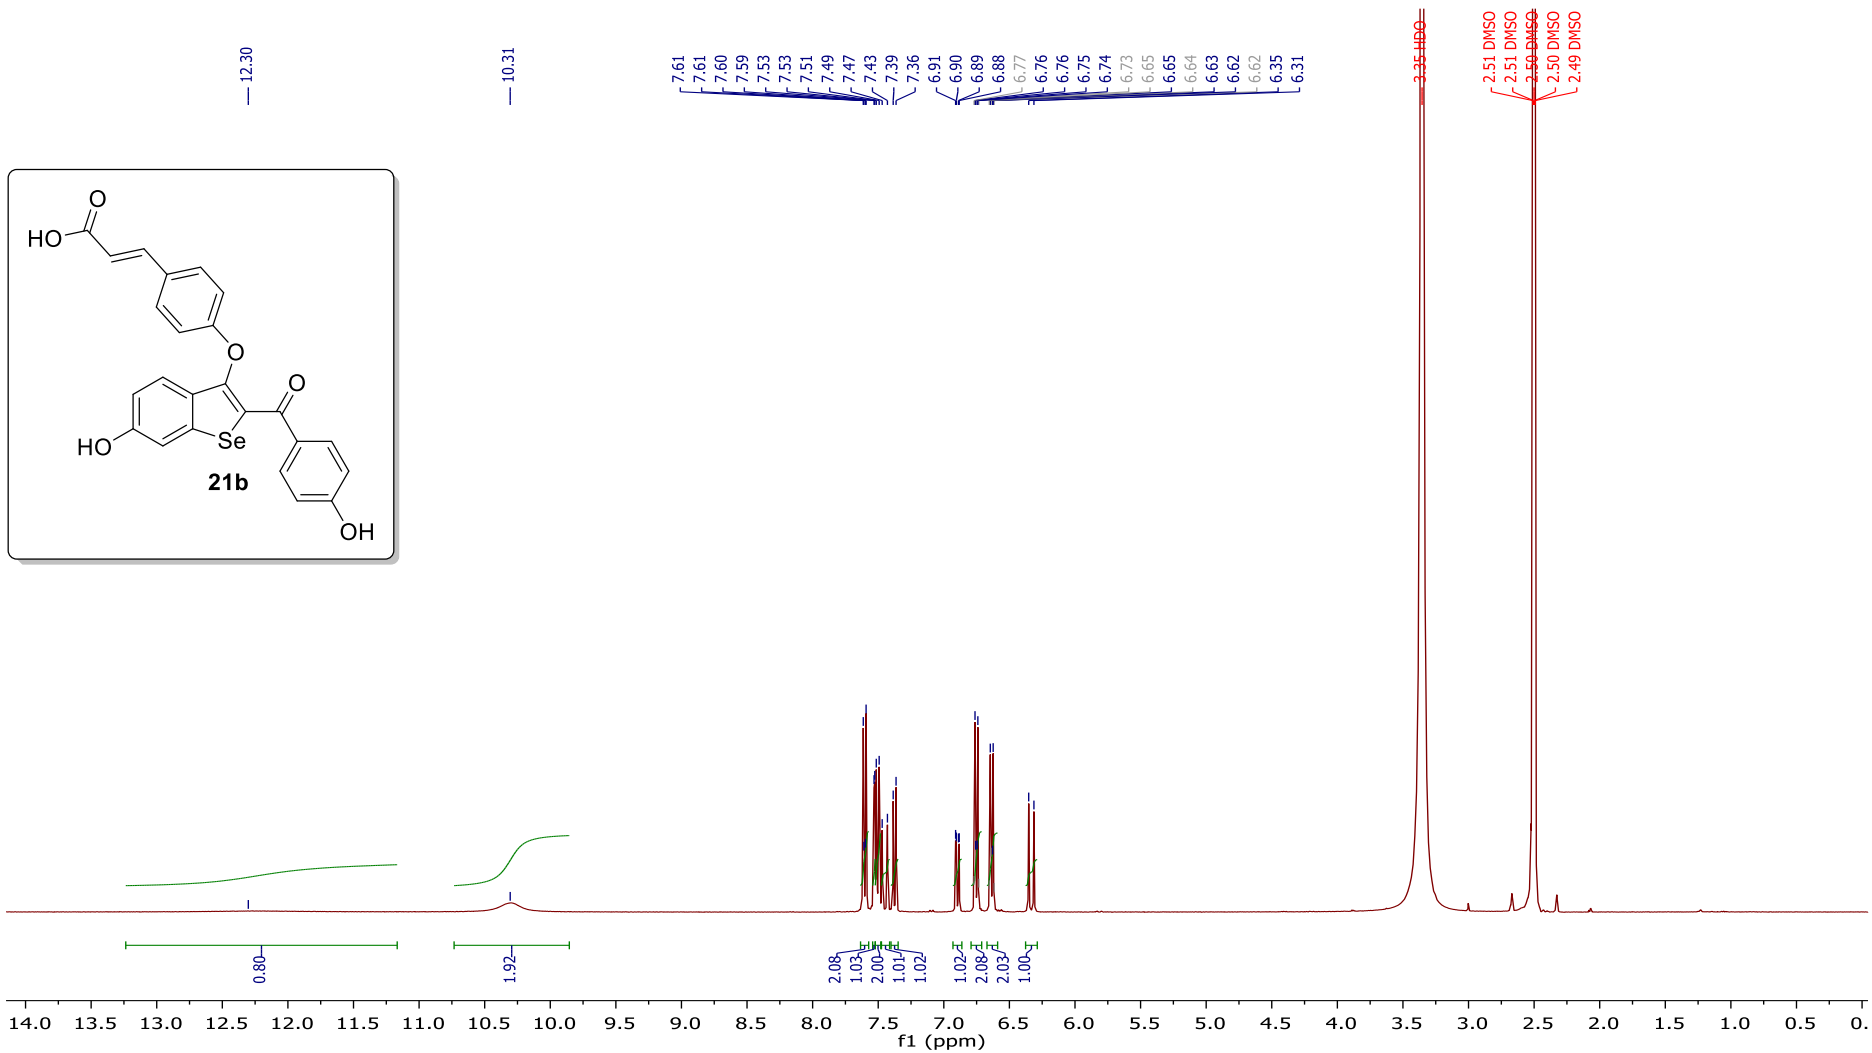

$^{13}\text{C}$  NMR (100.6 MHz, DMSO- $\text{d}_6$ ):

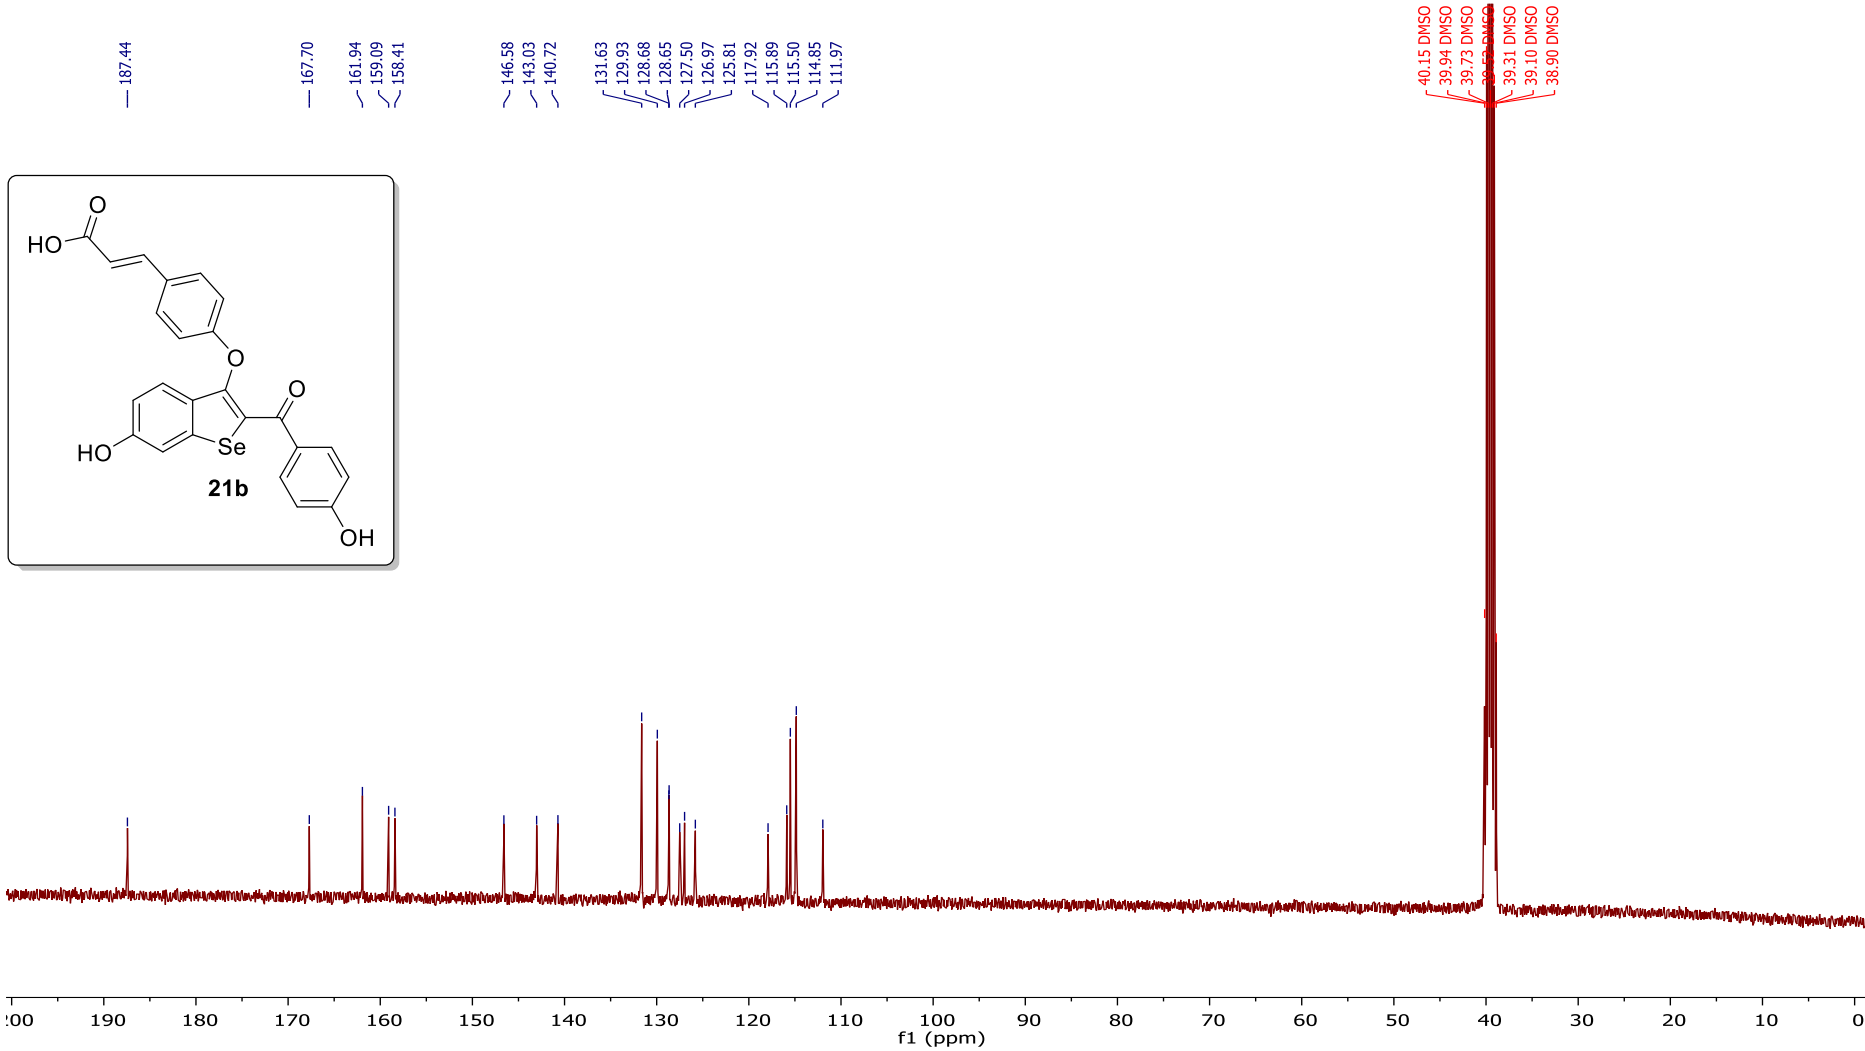

$^{77}\text{Se}$  NMR (76.37 MHz, DMSO- $d_6$ ):

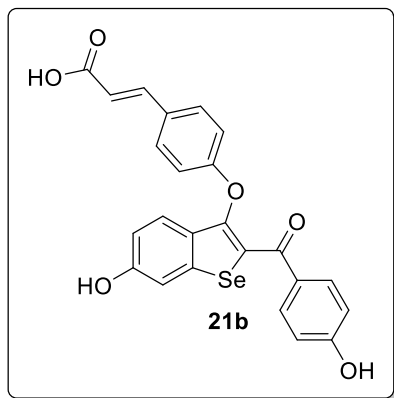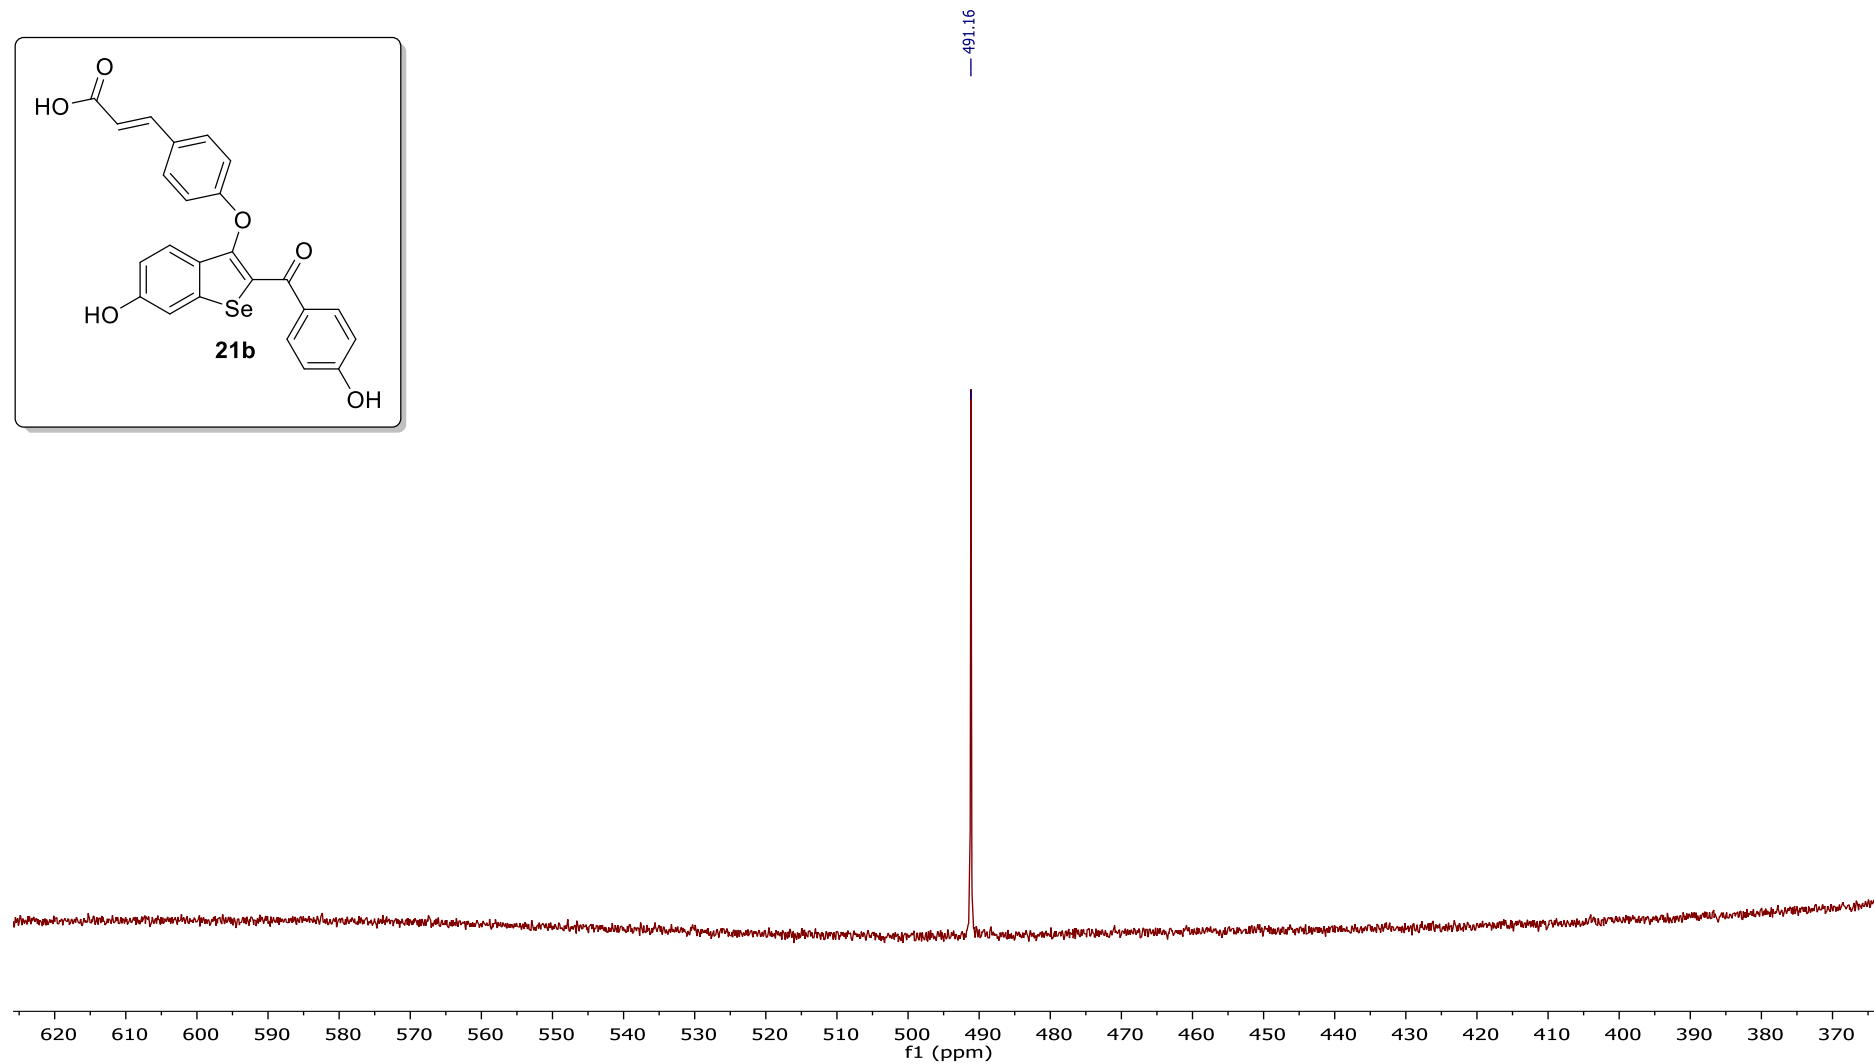

$^1\text{H}$  NMR (400 MHz, DMSO- $d_6$ ):

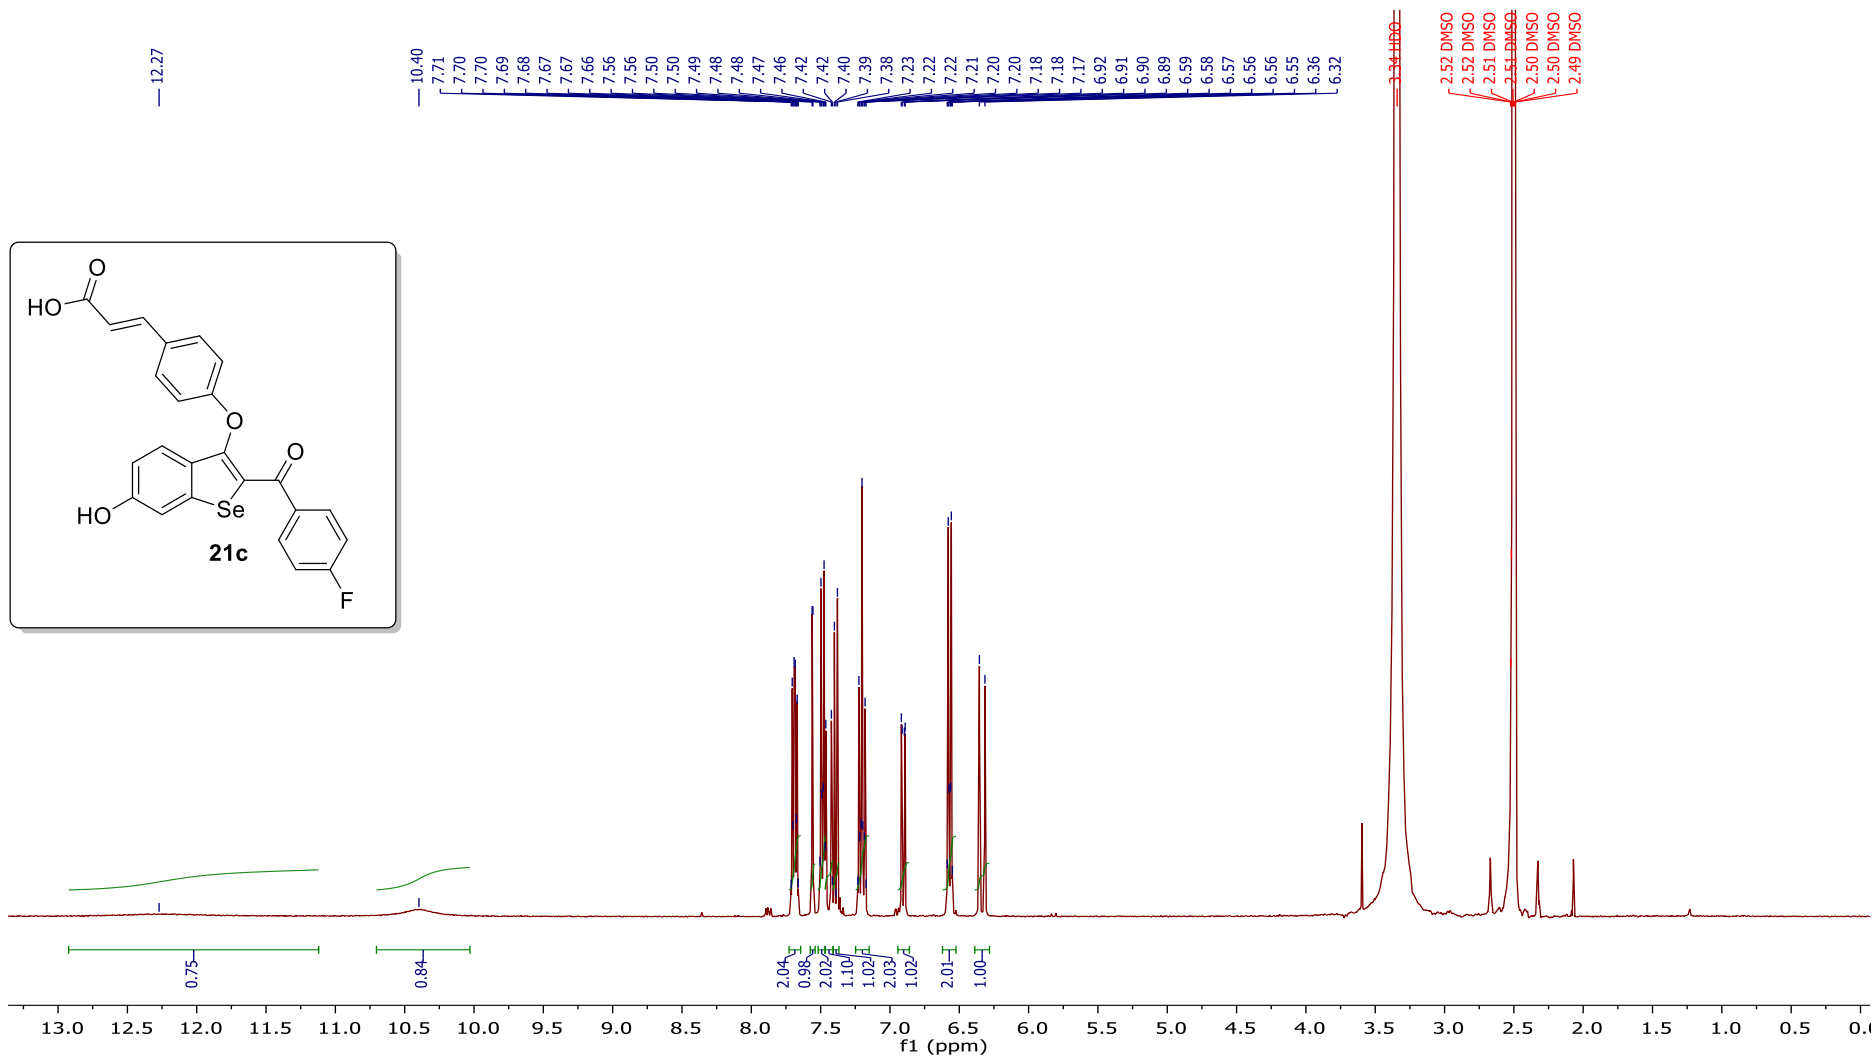

<sup>13</sup>C NMR (100.6 MHz, DMSO-d<sub>6</sub>):

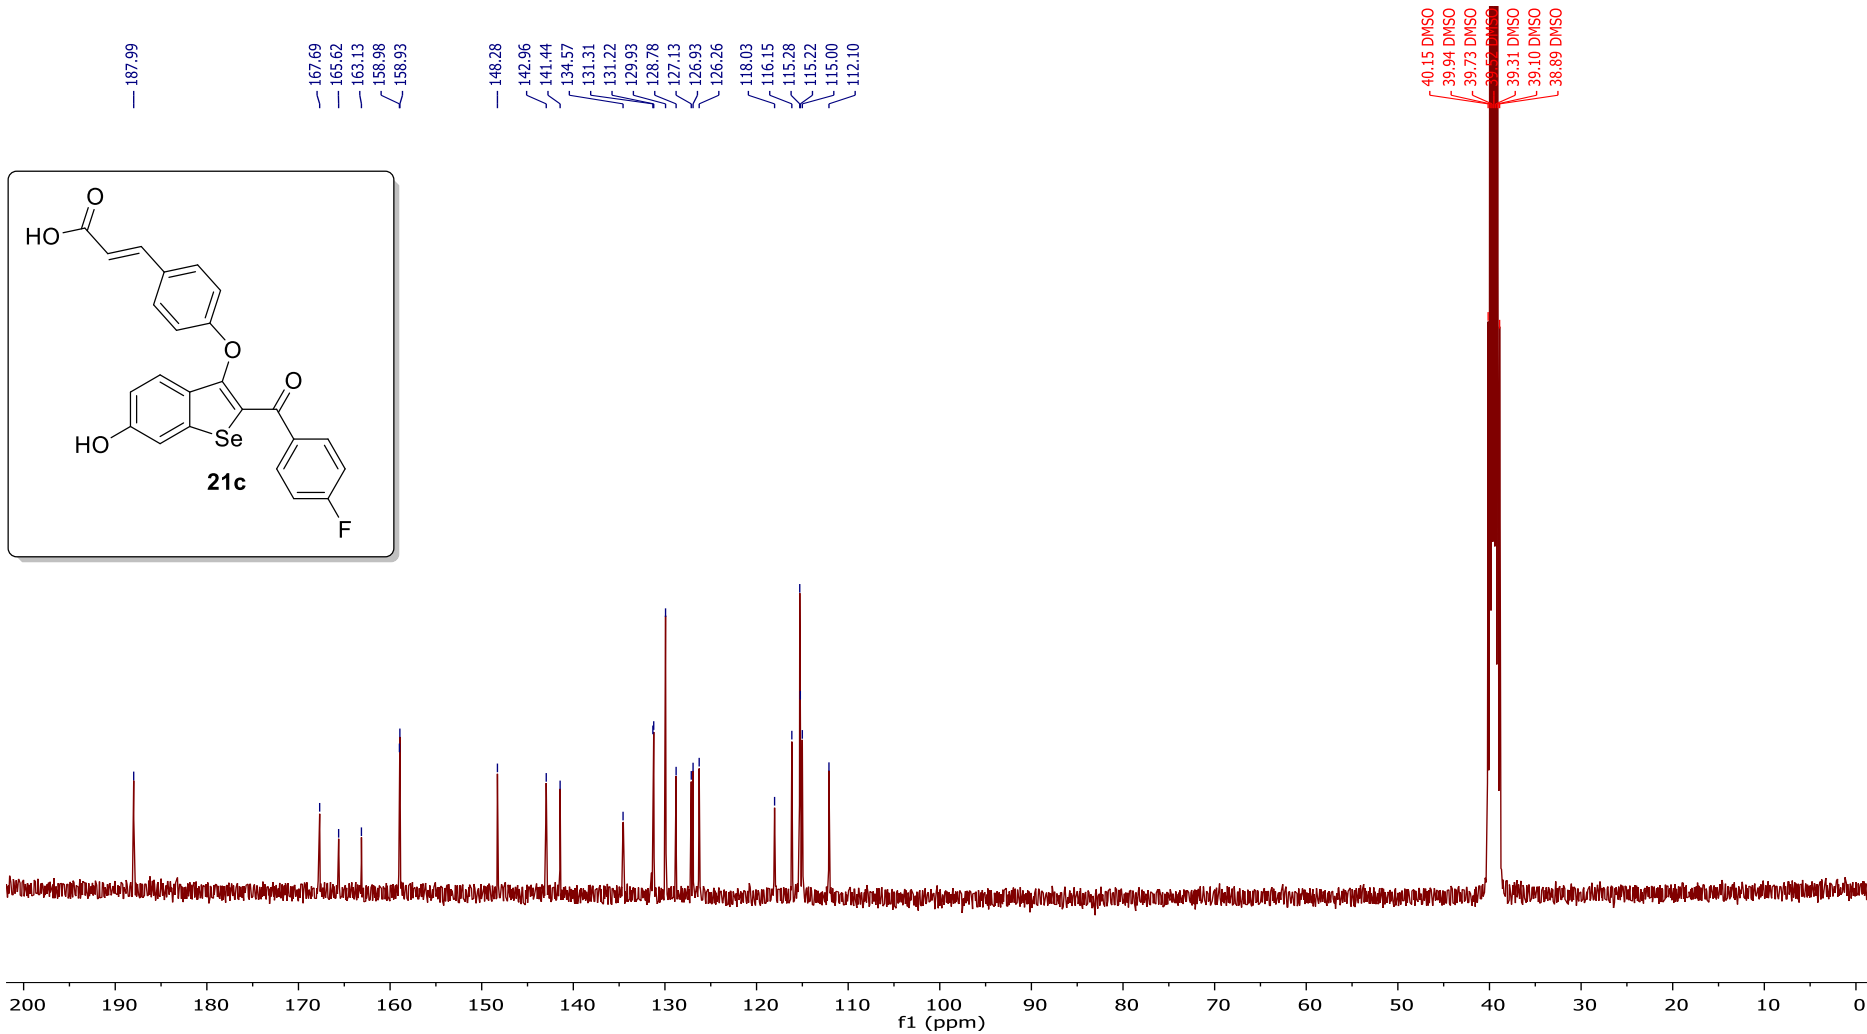



$^{19}\text{F}$  NMR (376.21 MHz,  $\text{DMSO-d}_6$ ):

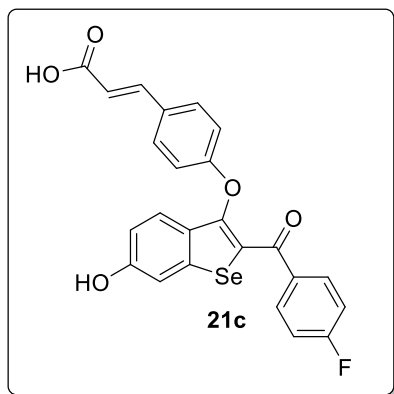

-107.01

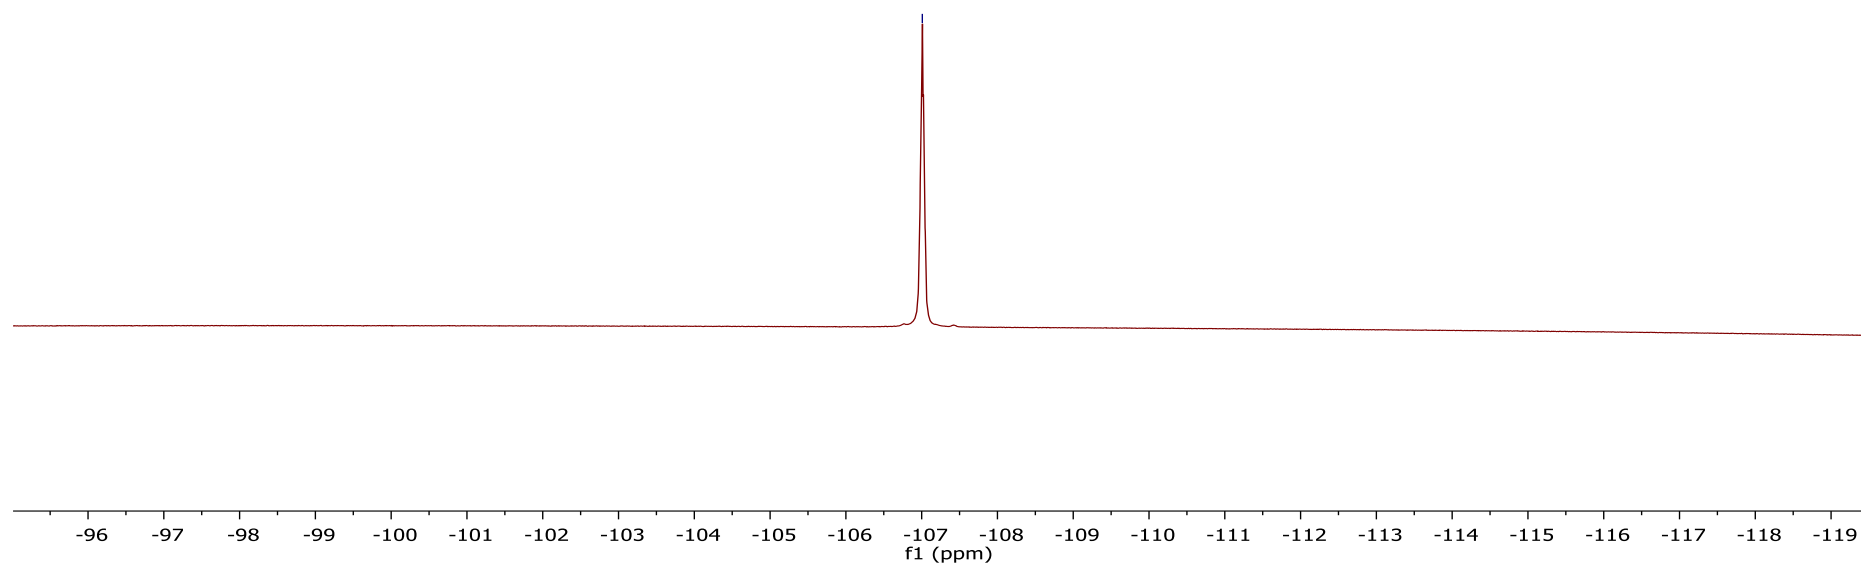

$^{77}\text{Se}$  NMR (76.37 MHz, DMSO- $d_6$ ):

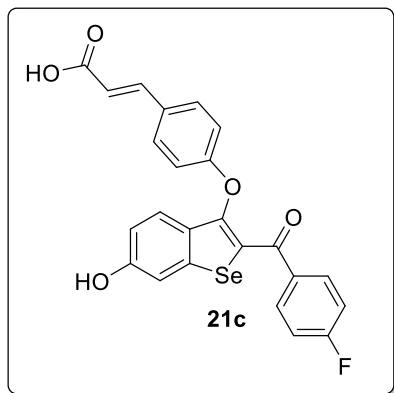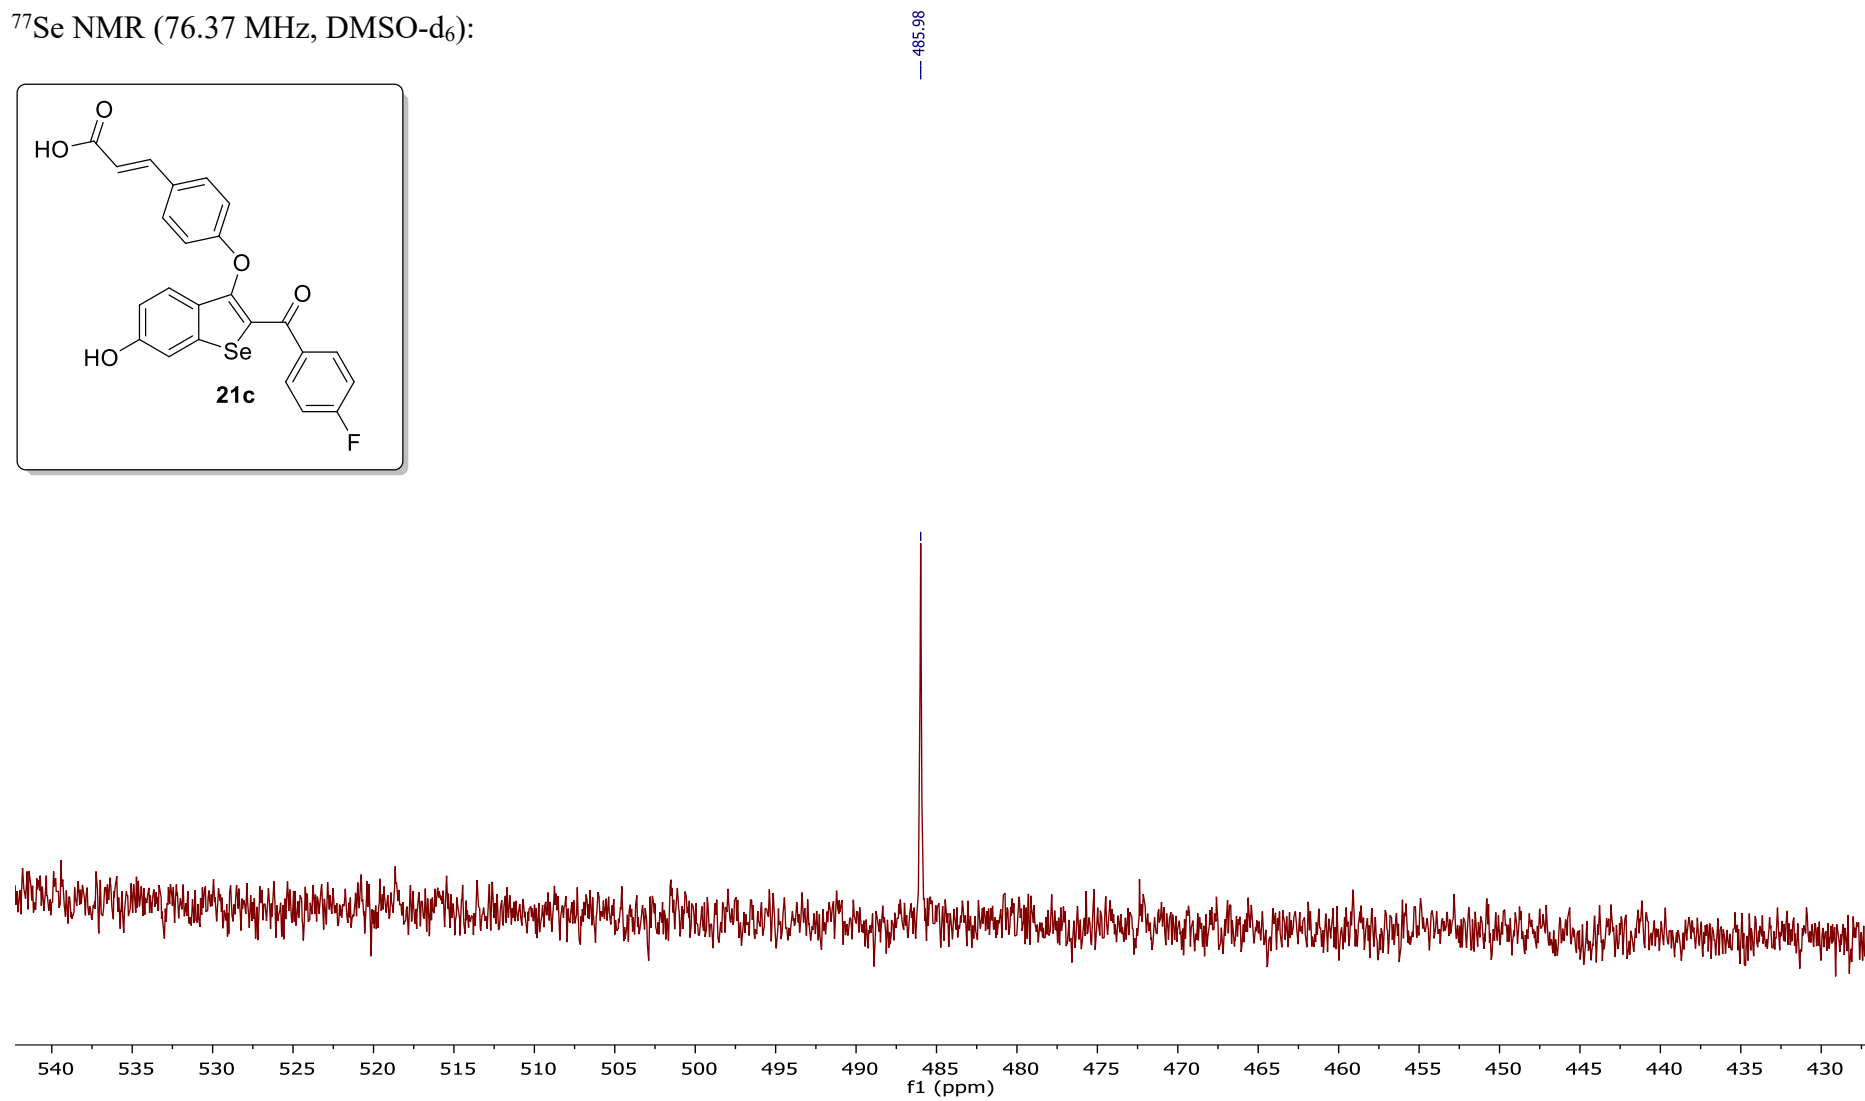

$^1\text{H}$  NMR (400 MHz, DMSO- $d_6$ ):

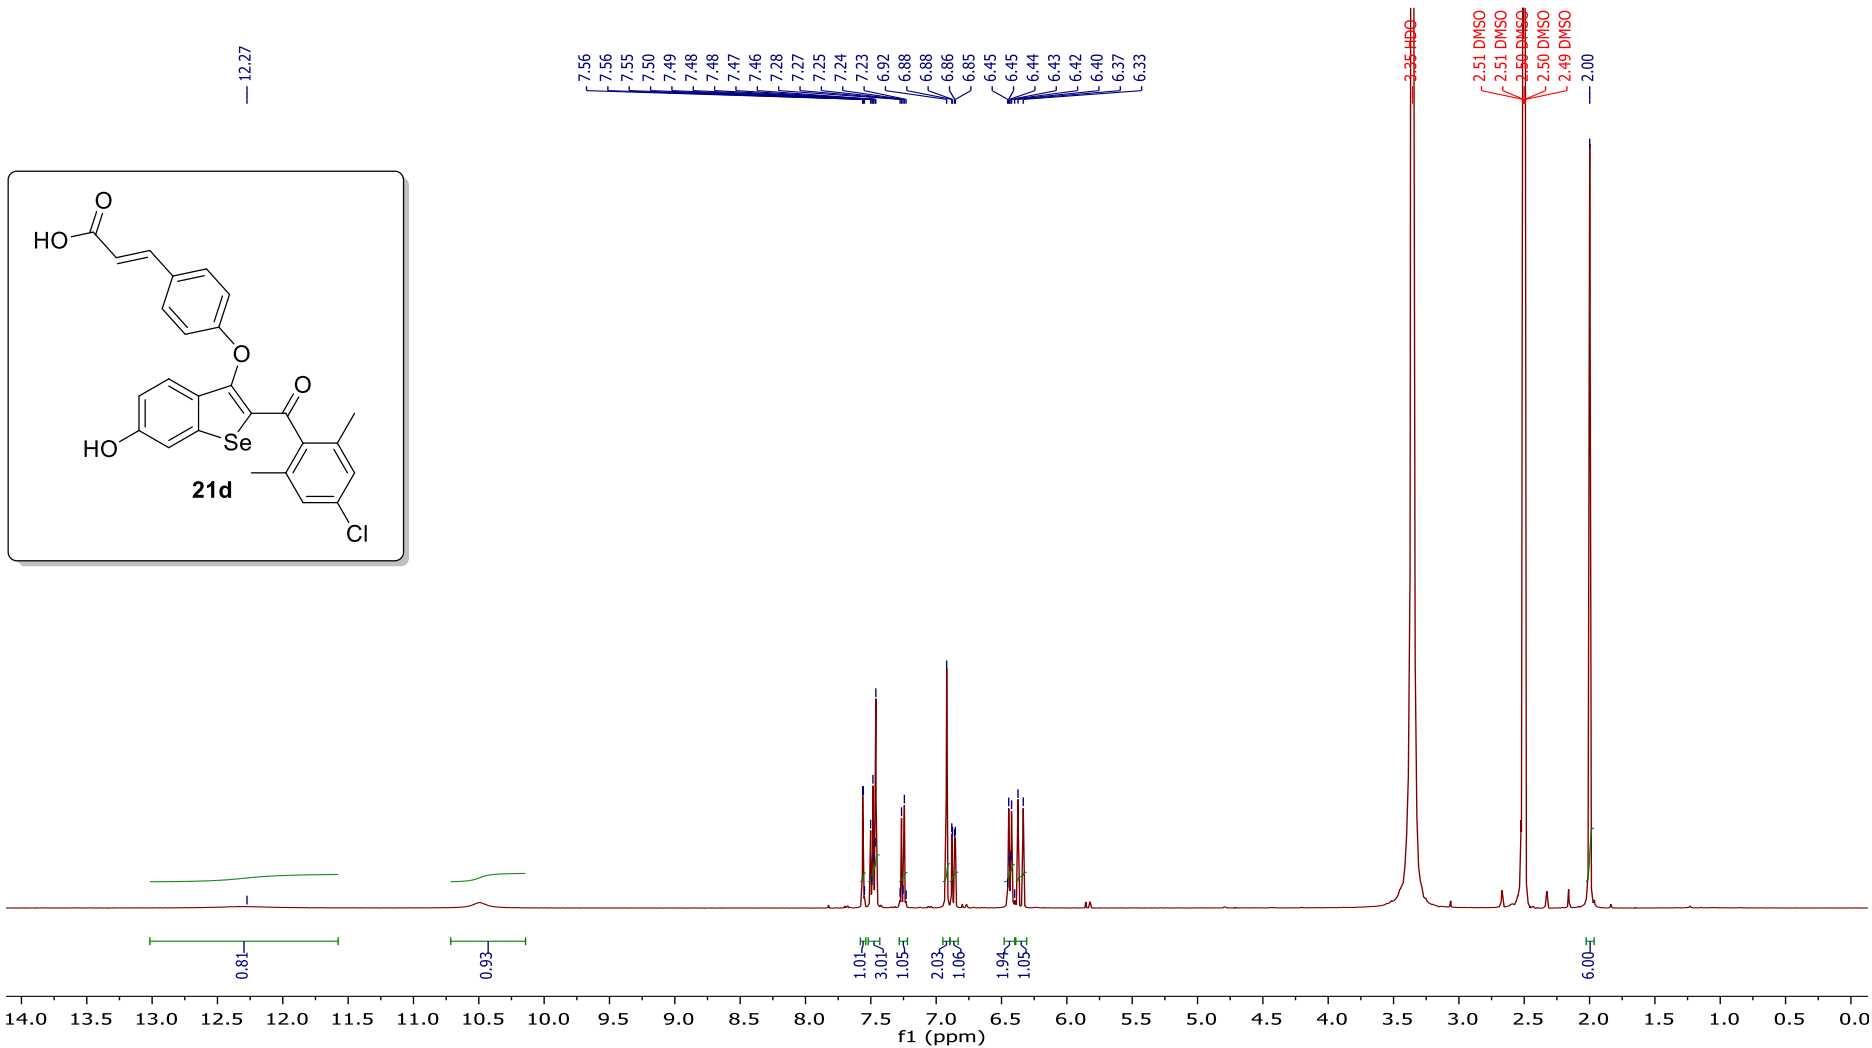

$^{13}\text{C}$  NMR (100.6 MHz, DMSO- $d_6$ ):

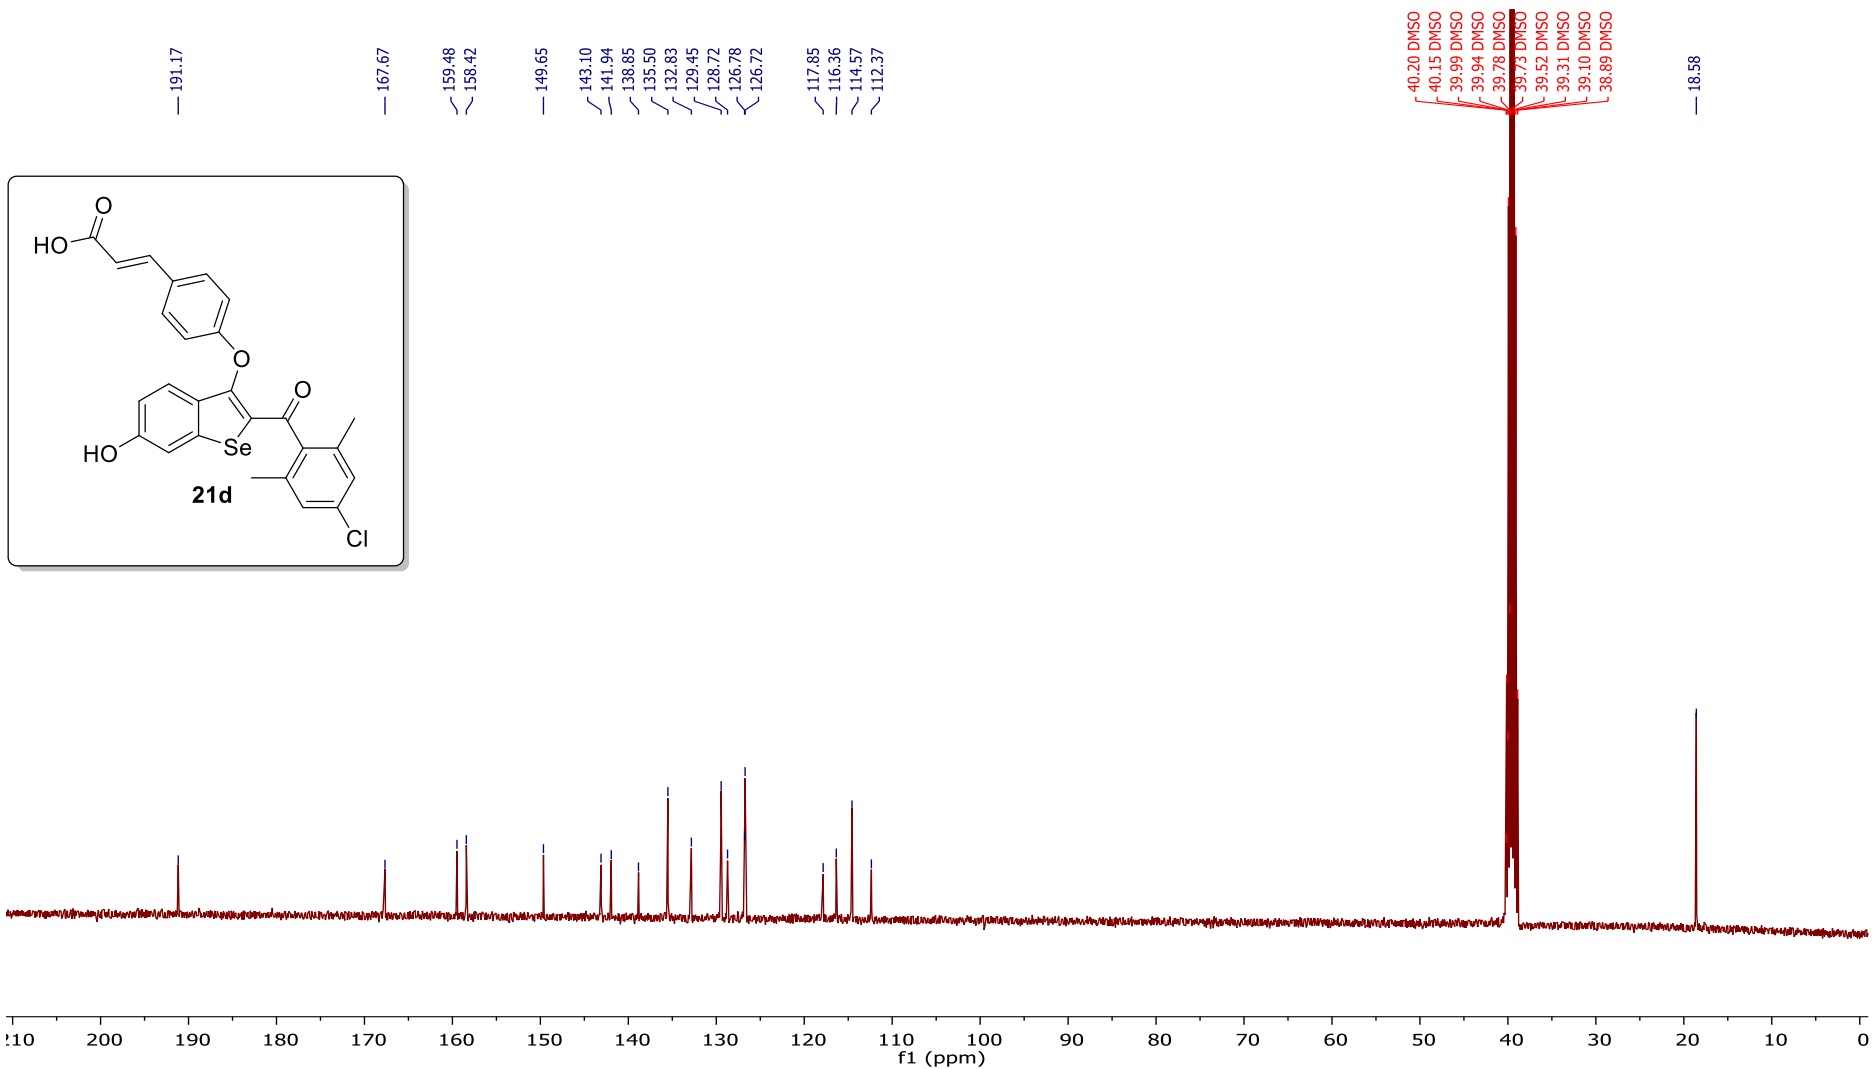

$^{77}\text{Se}$  NMR (76.37 MHz, DMSO- $d_6$ ):

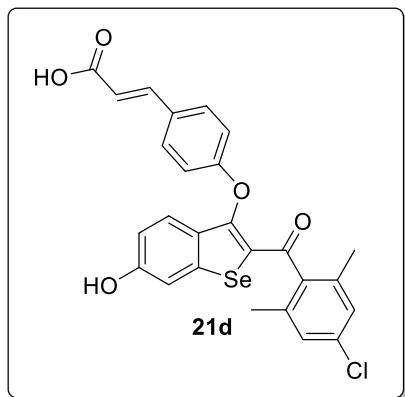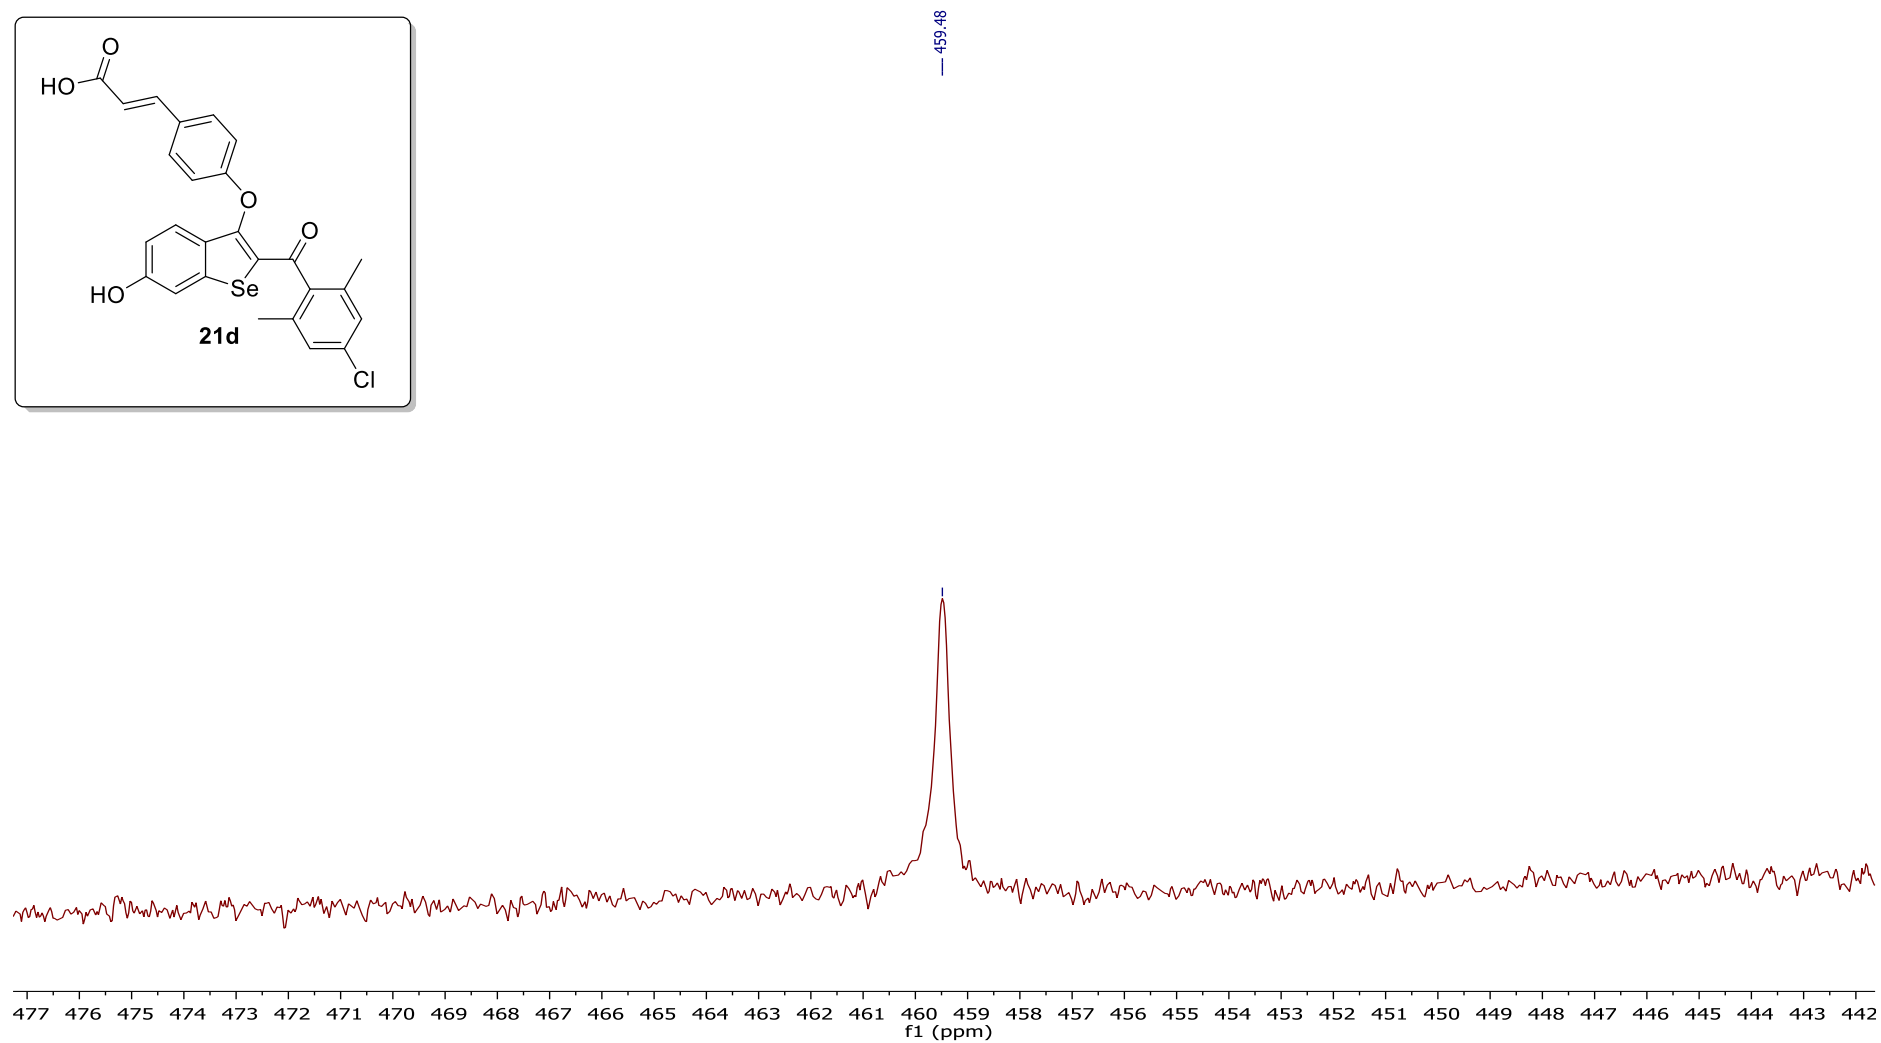

$^1\text{H}$  NMR (400 MHz, DMSO- $d_6$ ):

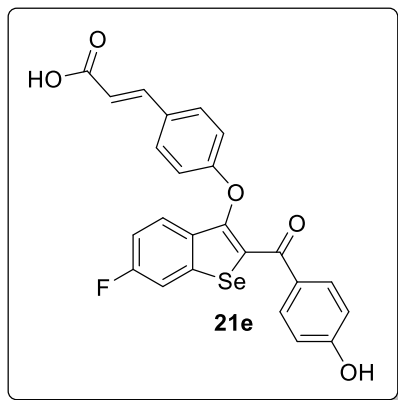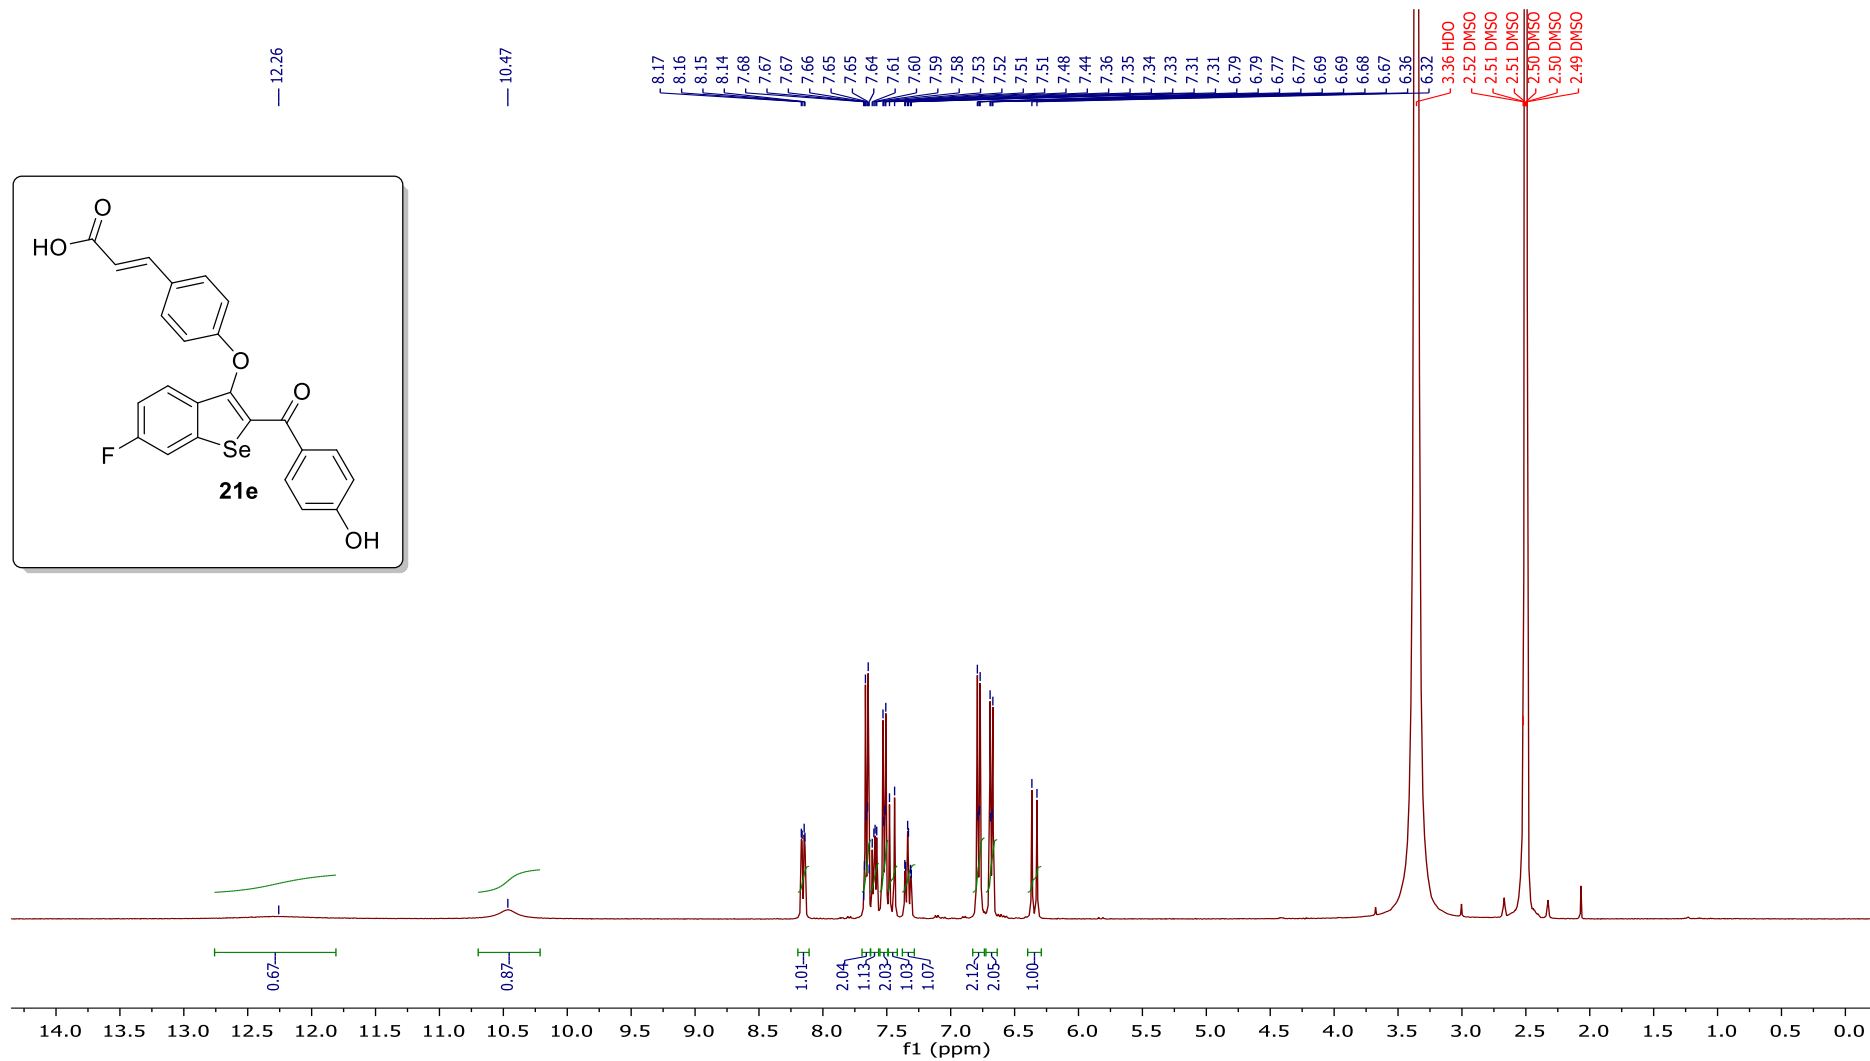

$^{13}\text{C}$  NMR (100.6 MHz, DMSO- $d_6$ ):

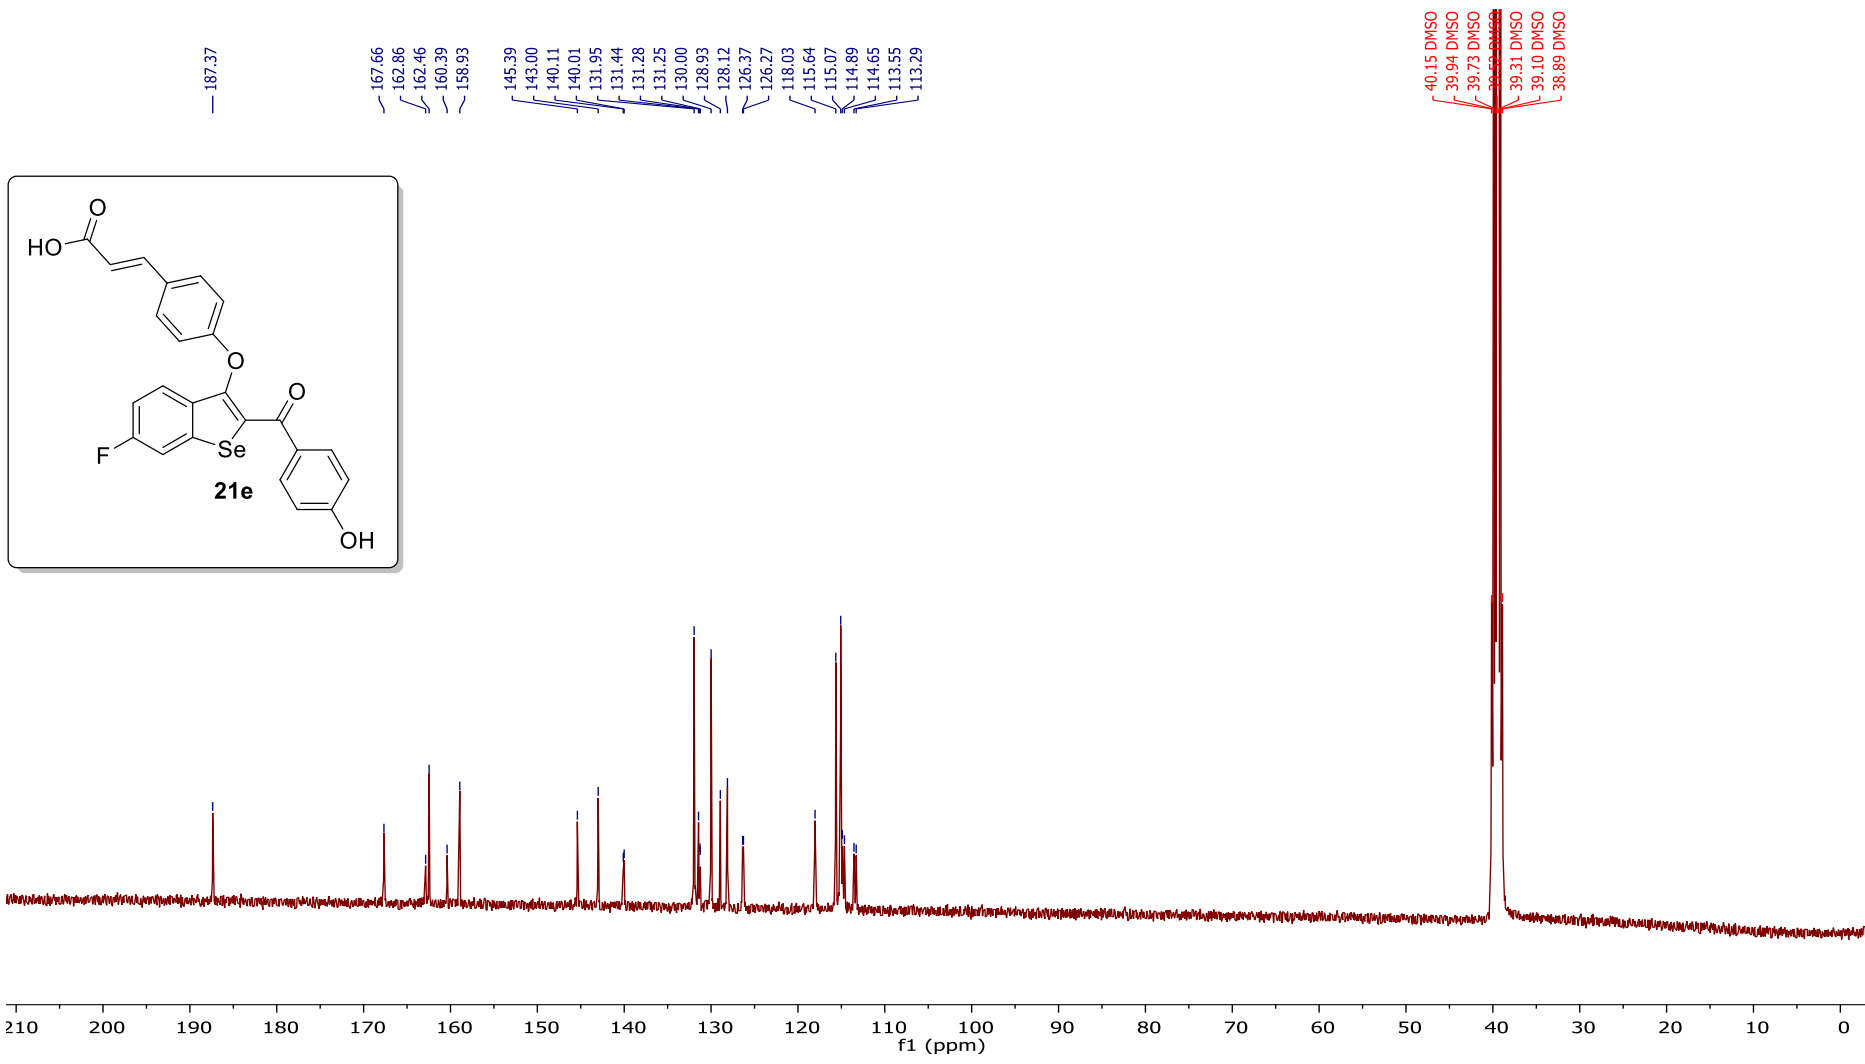

$^{19}\text{F}$  NMR (376.21 MHz,  $\text{DMSO-d}_6$ ):

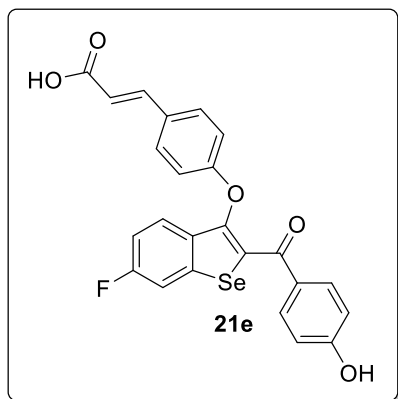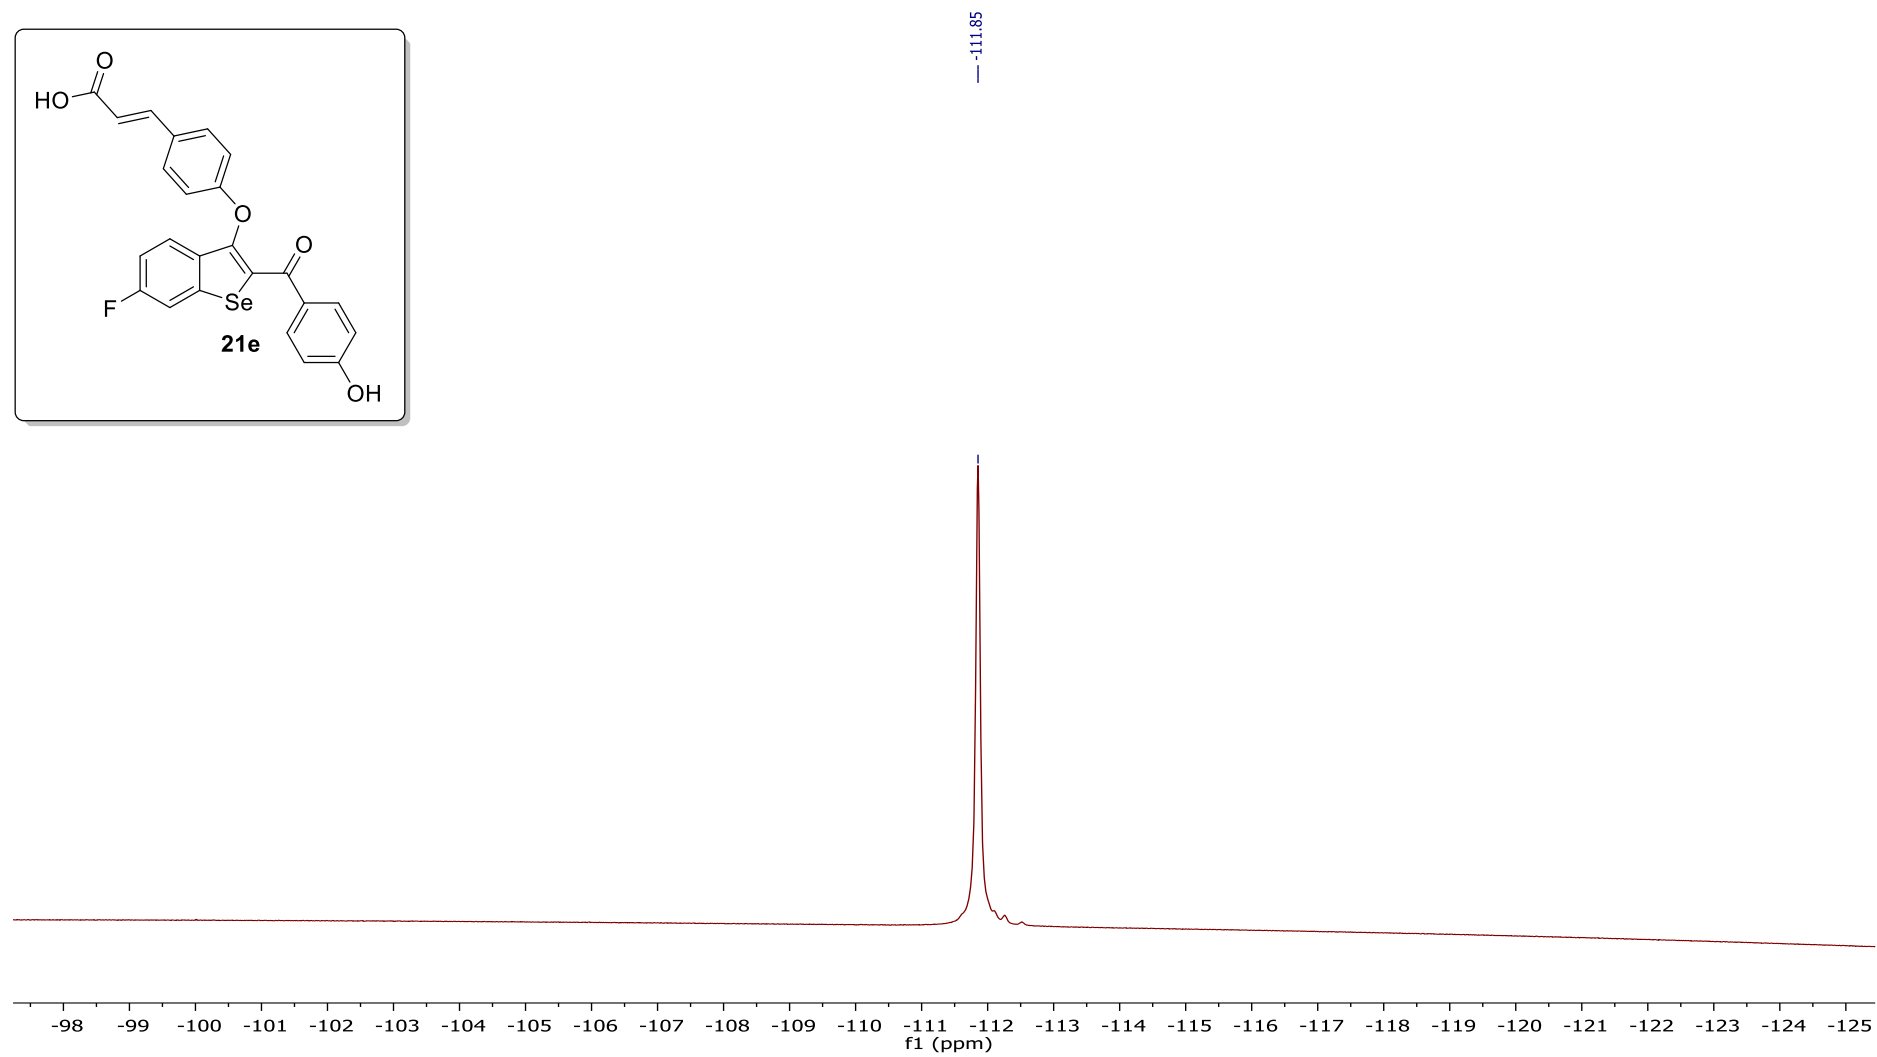



$^{77}\text{Se}$  NMR (76.37 MHz, DMSO- $d_6$ ):

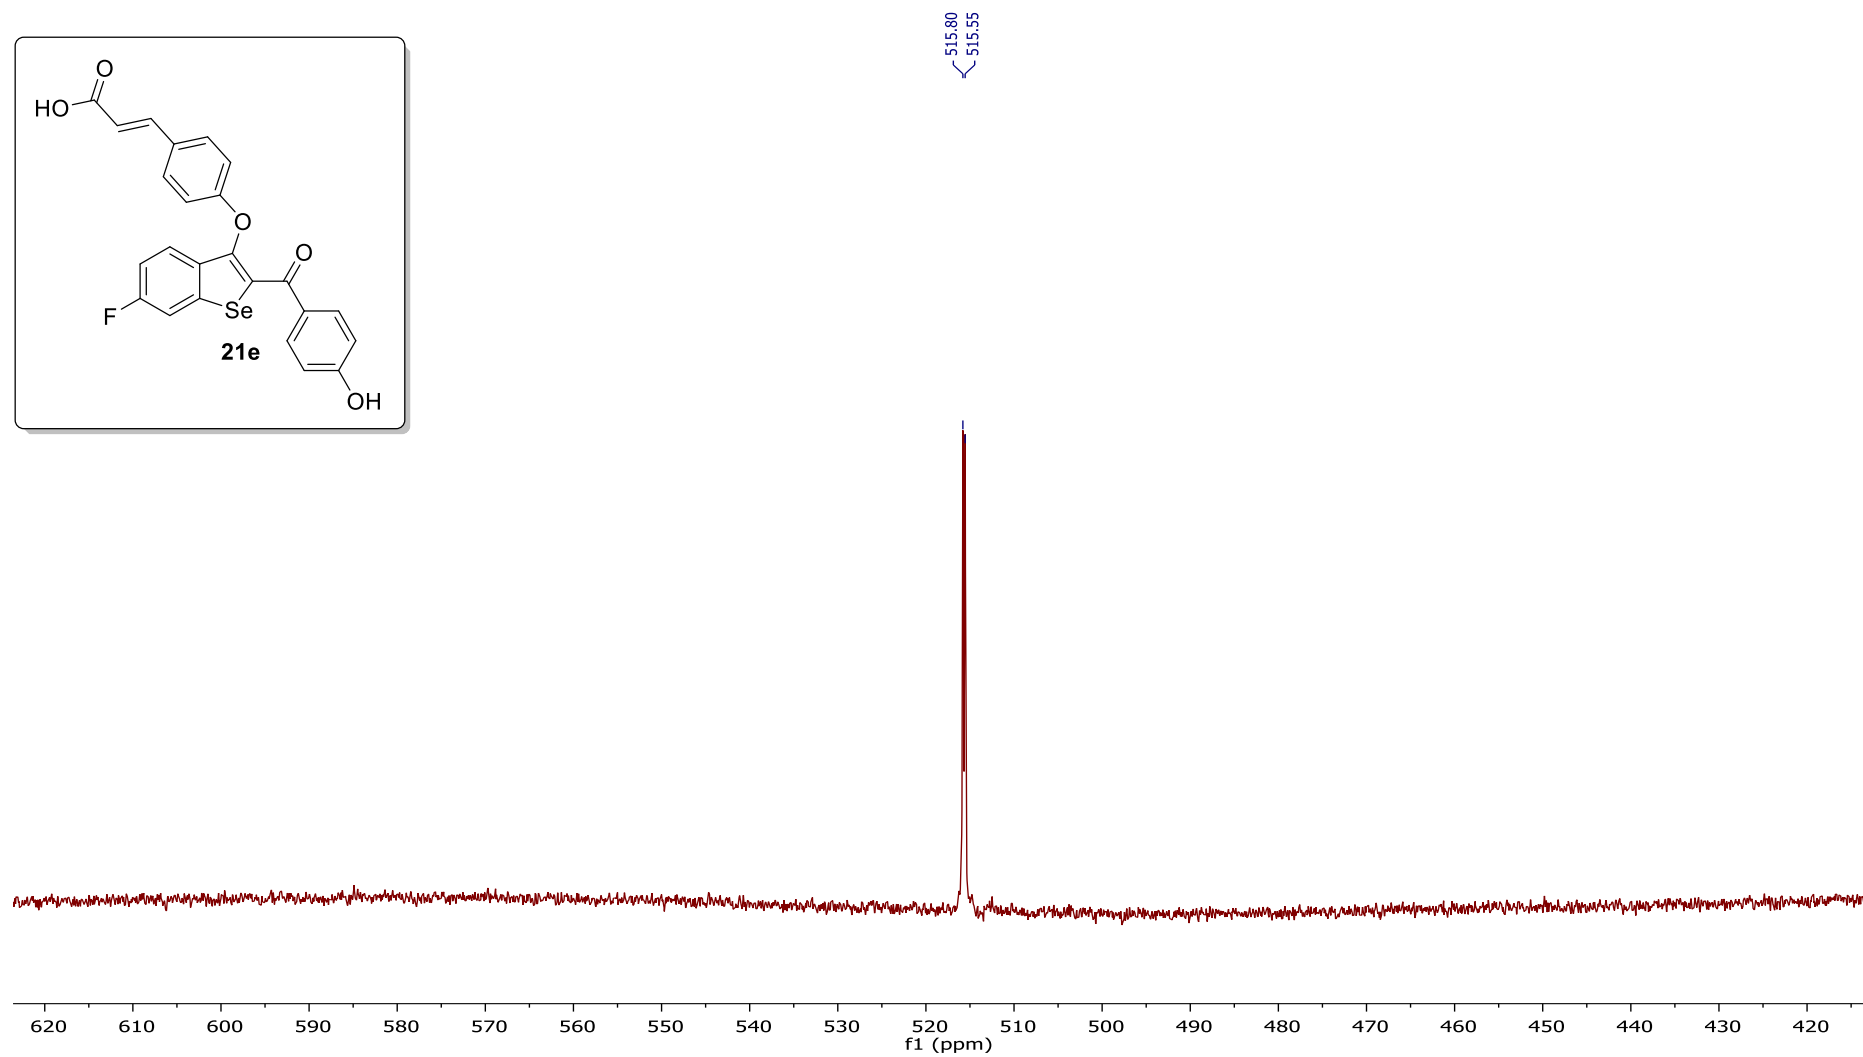

$^1\text{H NMR}$  (400 MHz,  $\text{CDCl}_3$ ):

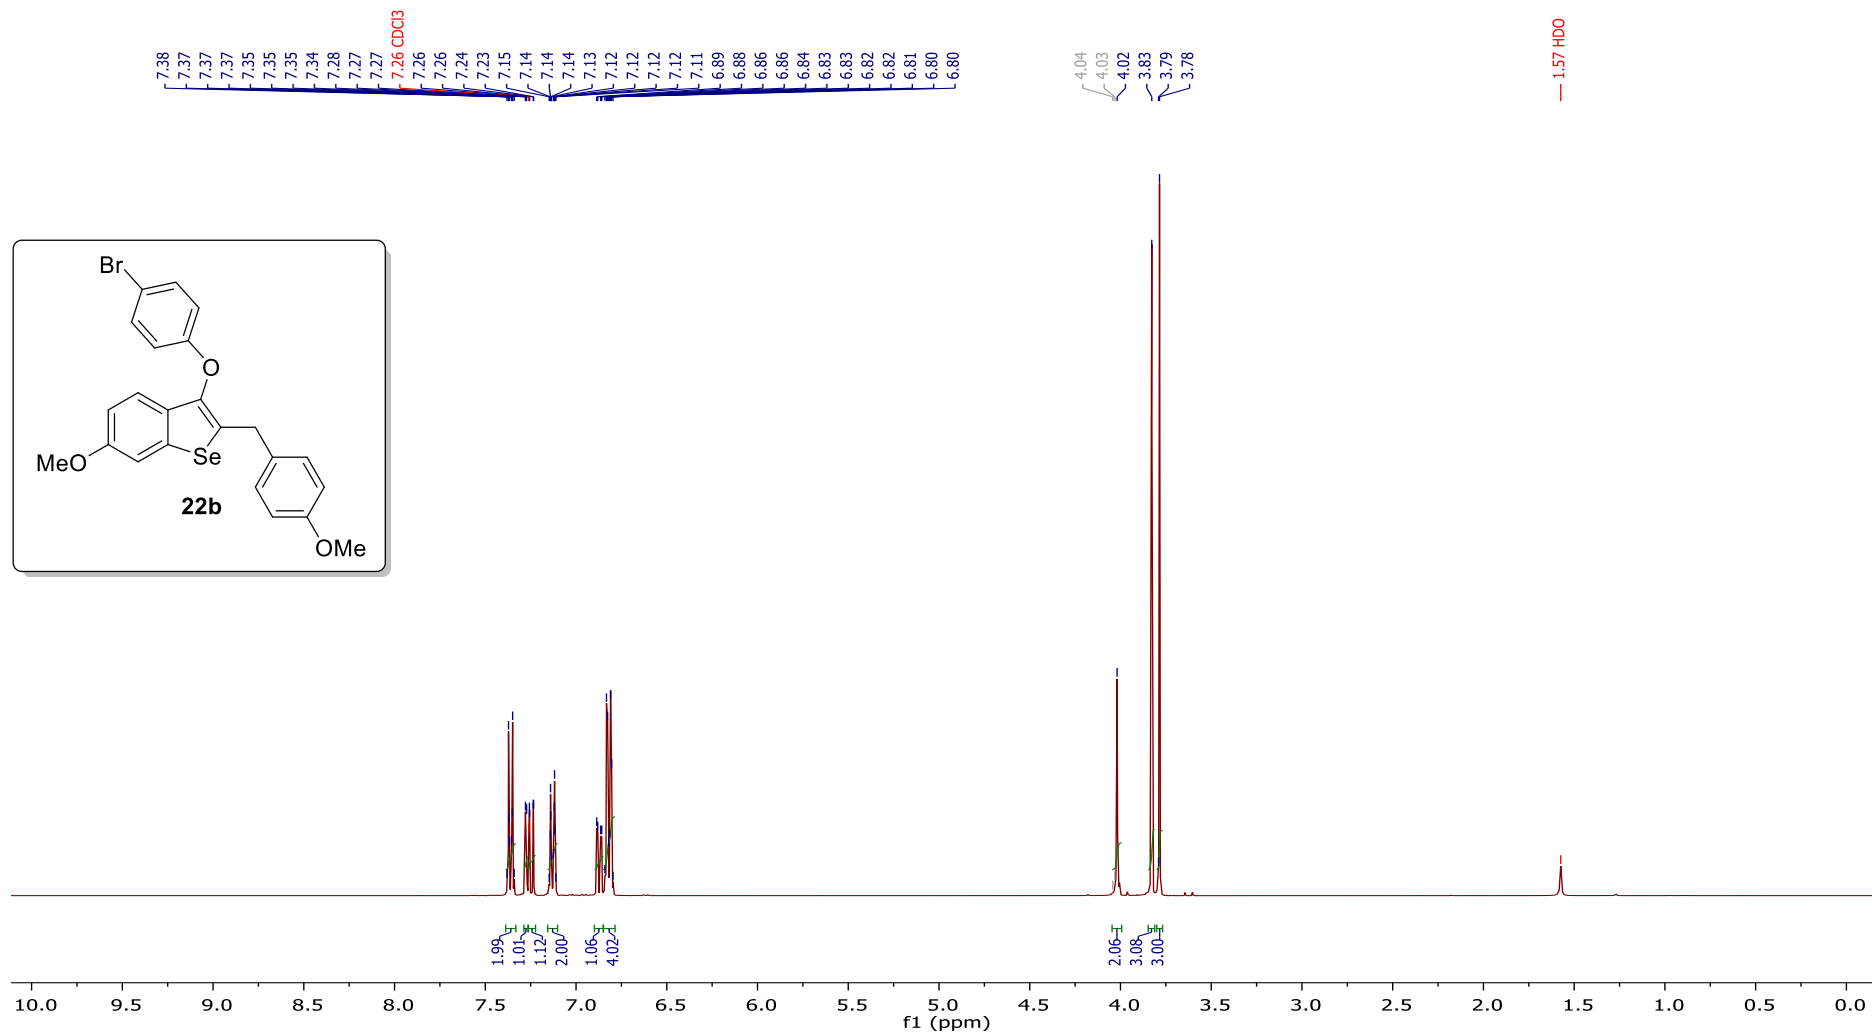

$^{13}\text{C}$  NMR (100.6 MHz,  $\text{CDCl}_3$ ):

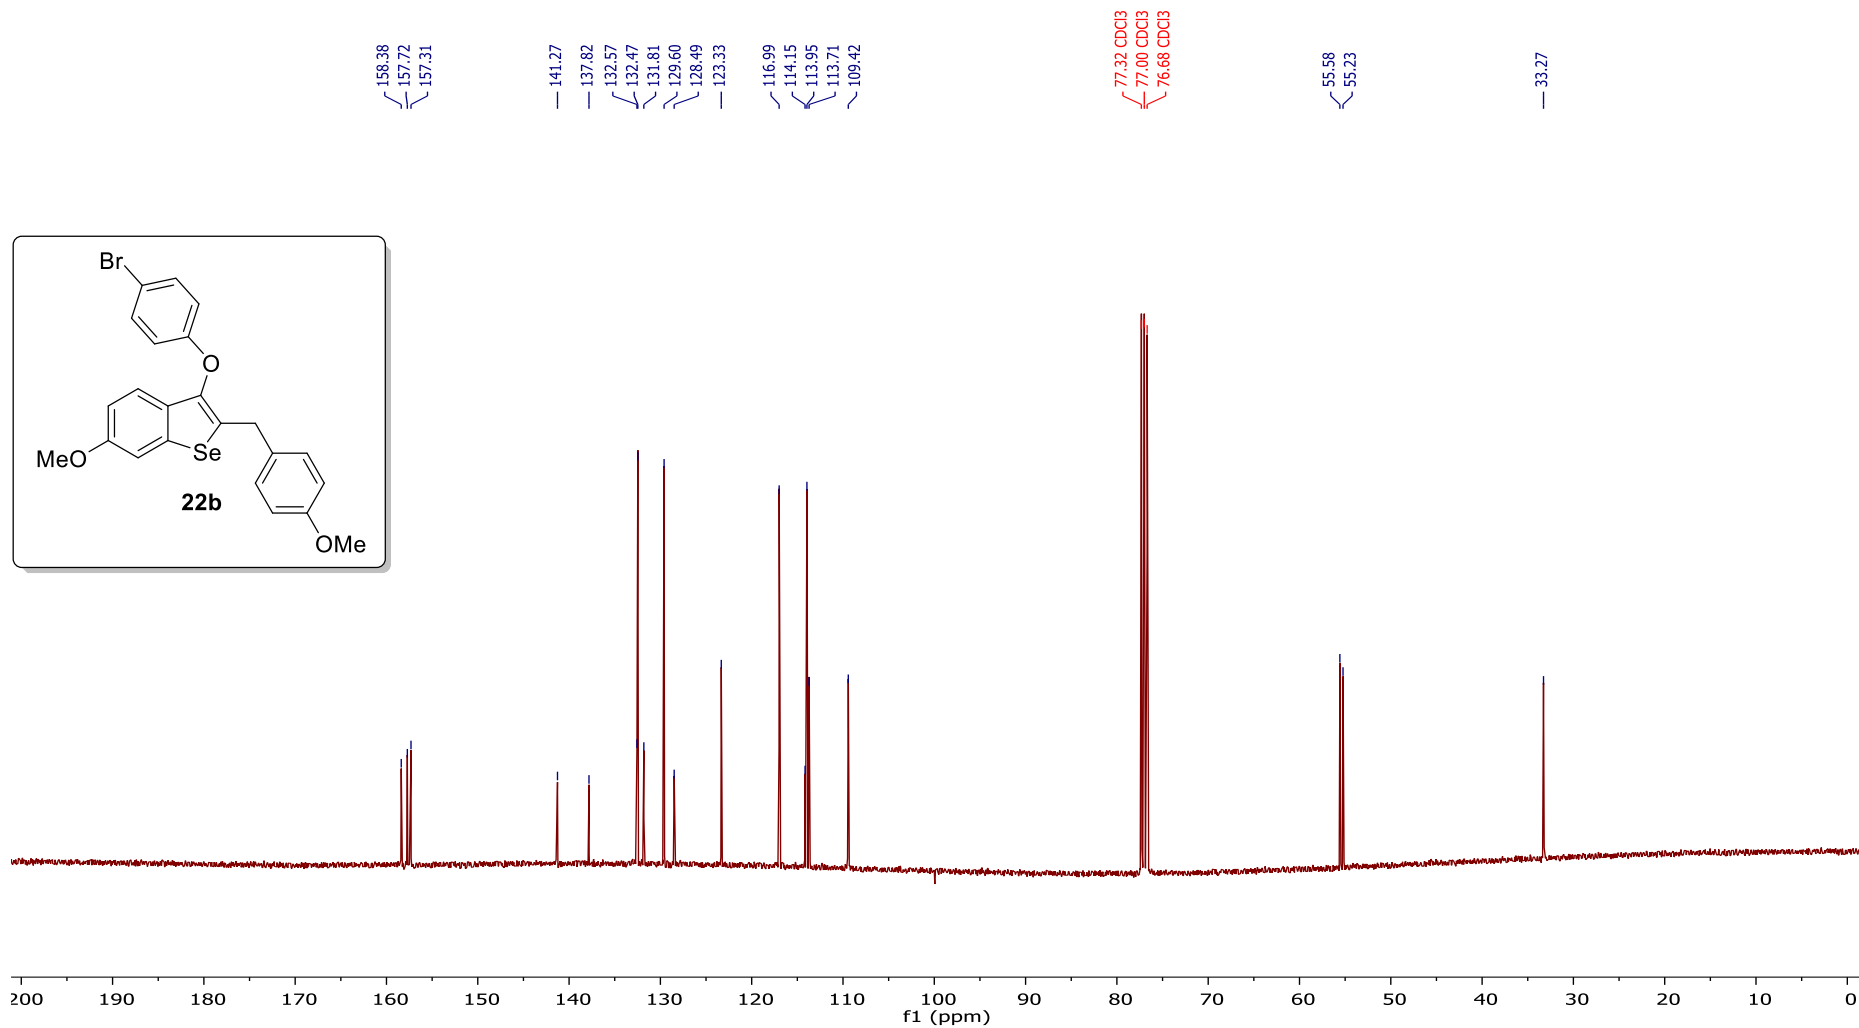

$^{77}\text{Se}$  NMR (76.37 MHz,  $\text{CDCl}_3$ ):

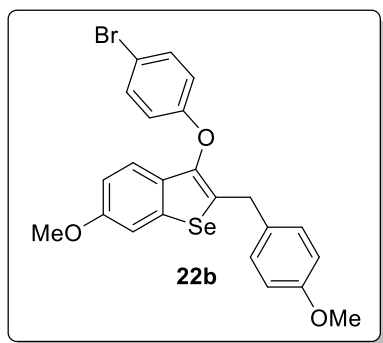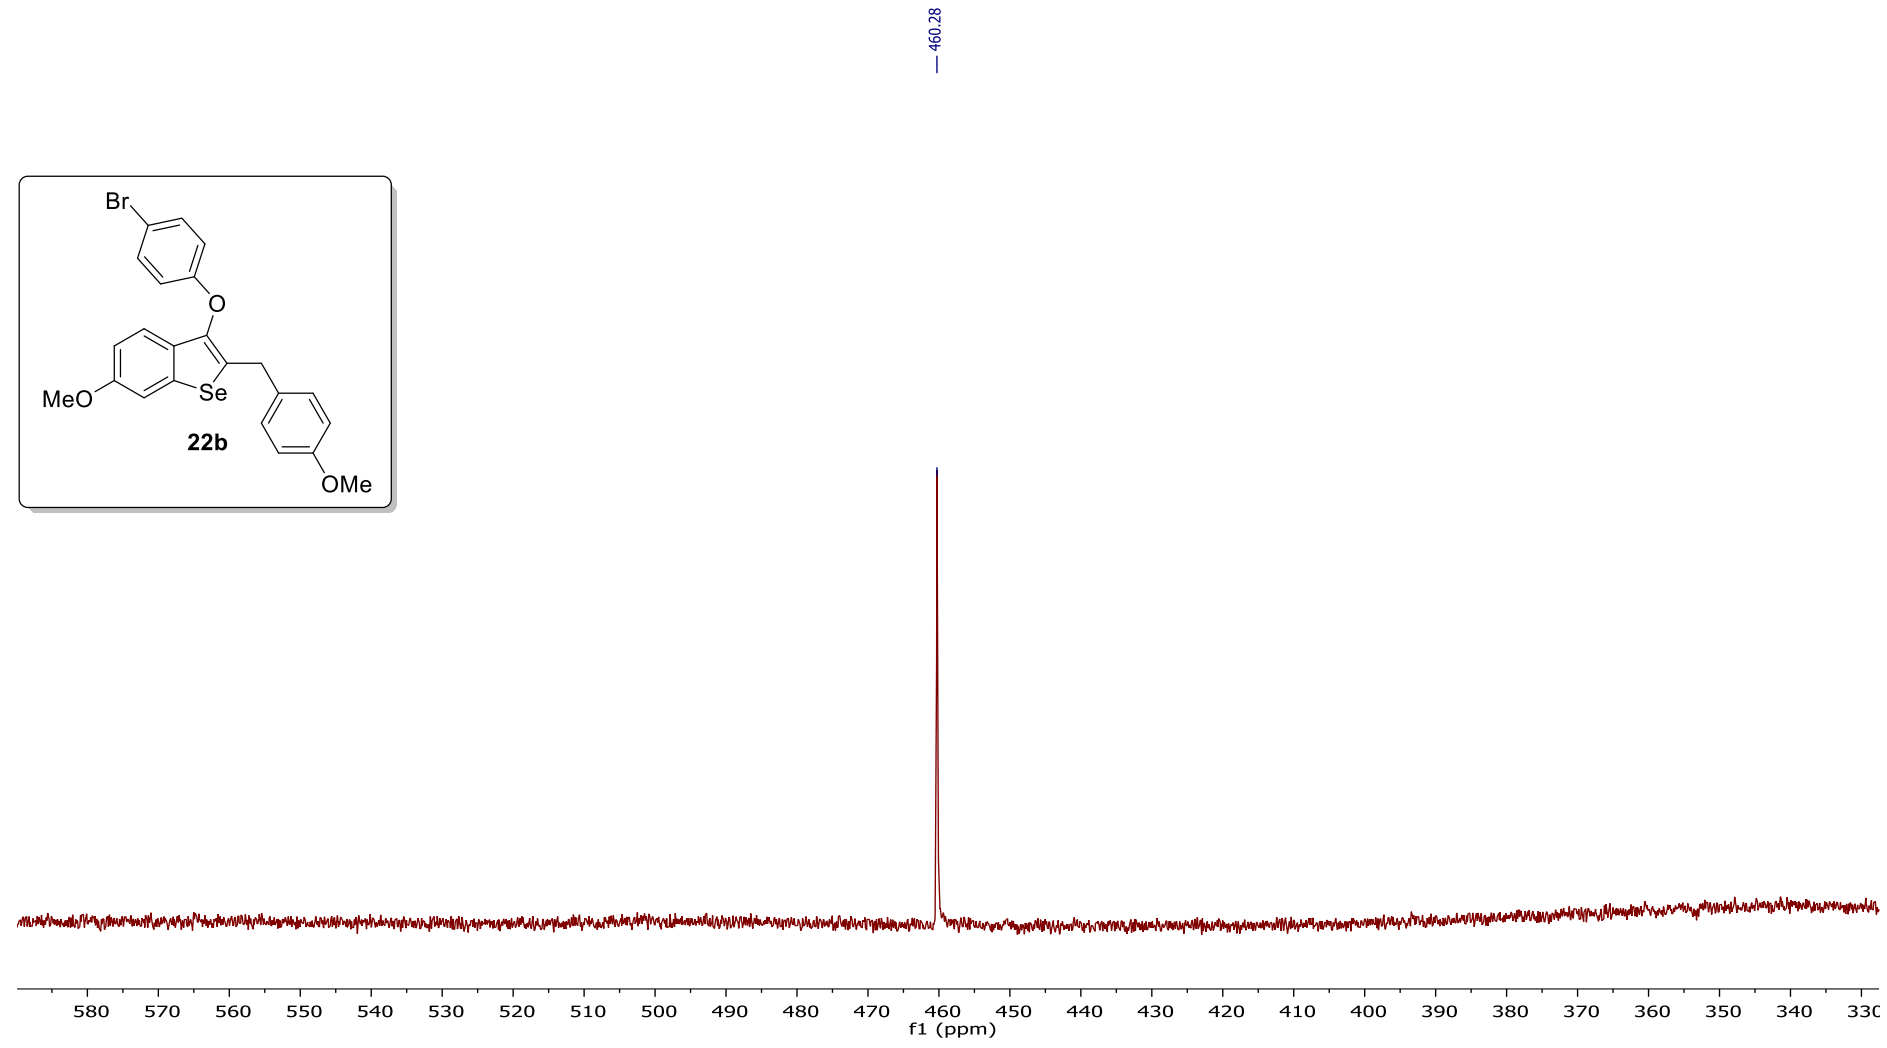

$^1\text{H}$  NMR (400 MHz,  $\text{CDCl}_3$ ):

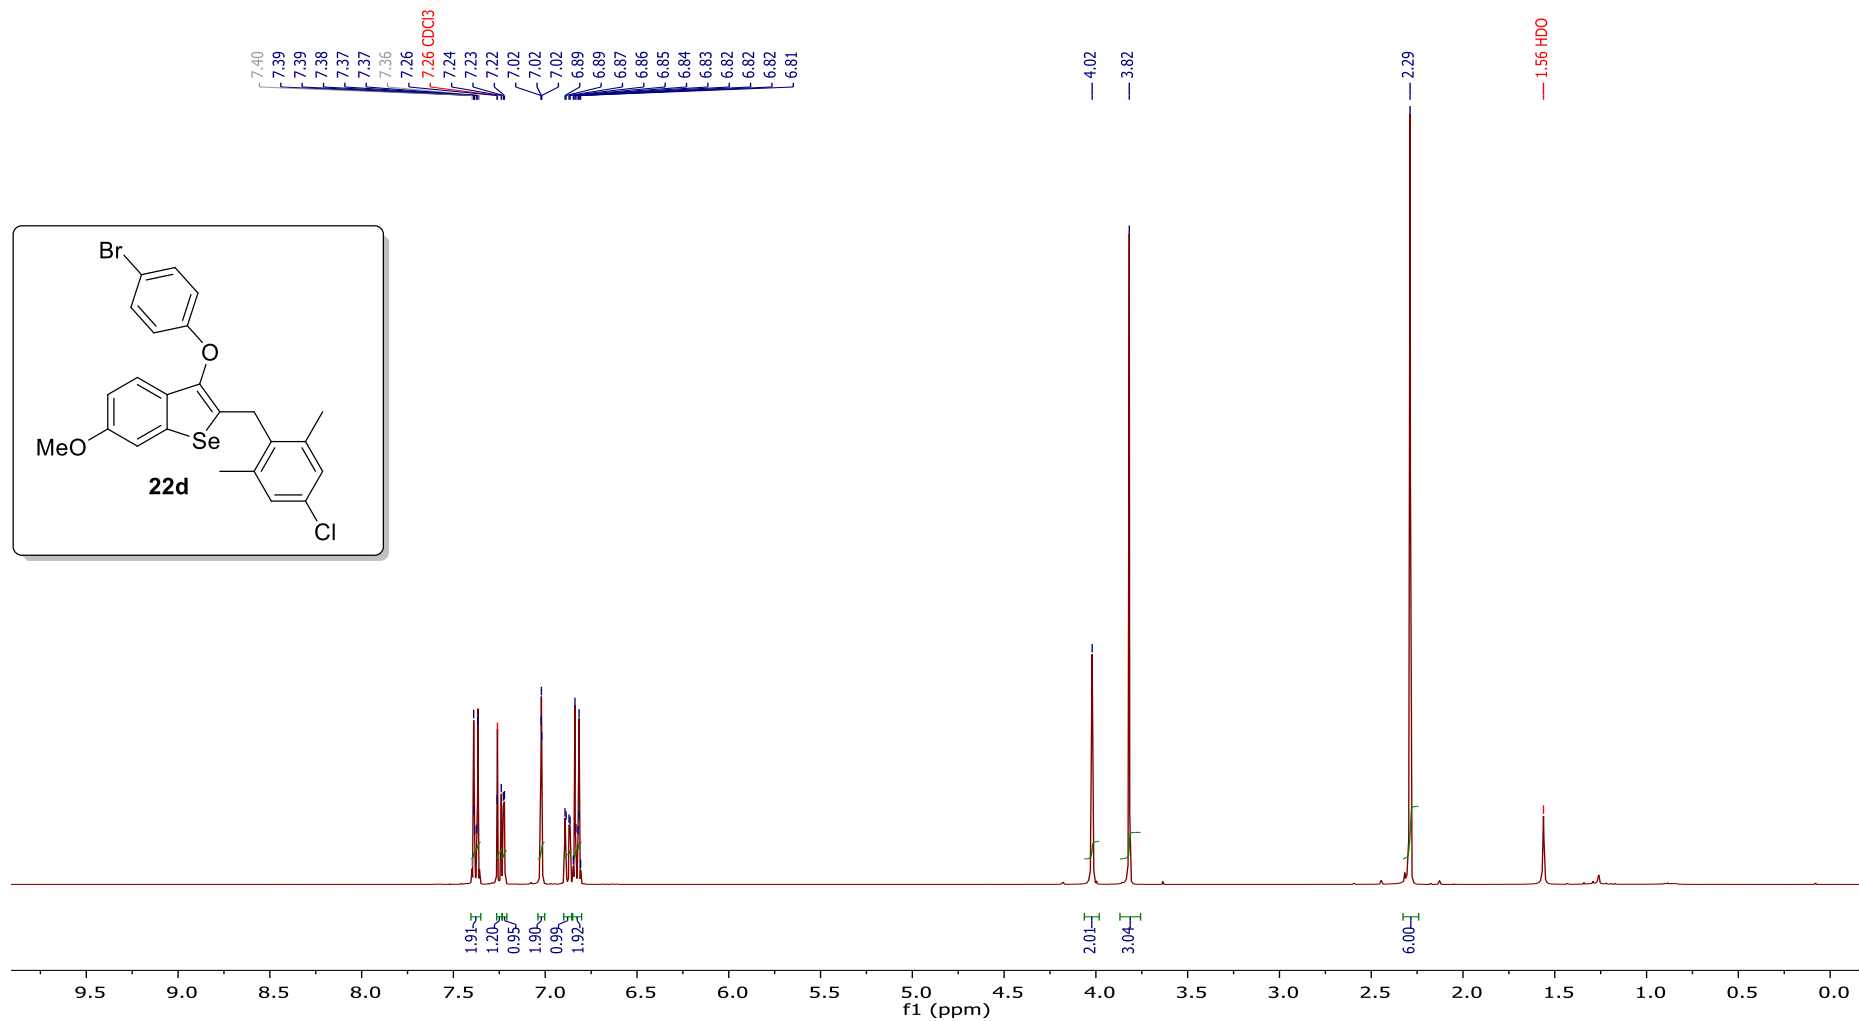

$^{13}\text{C}$  NMR (100.6 MHz,  $\text{CDCl}_3$ ):

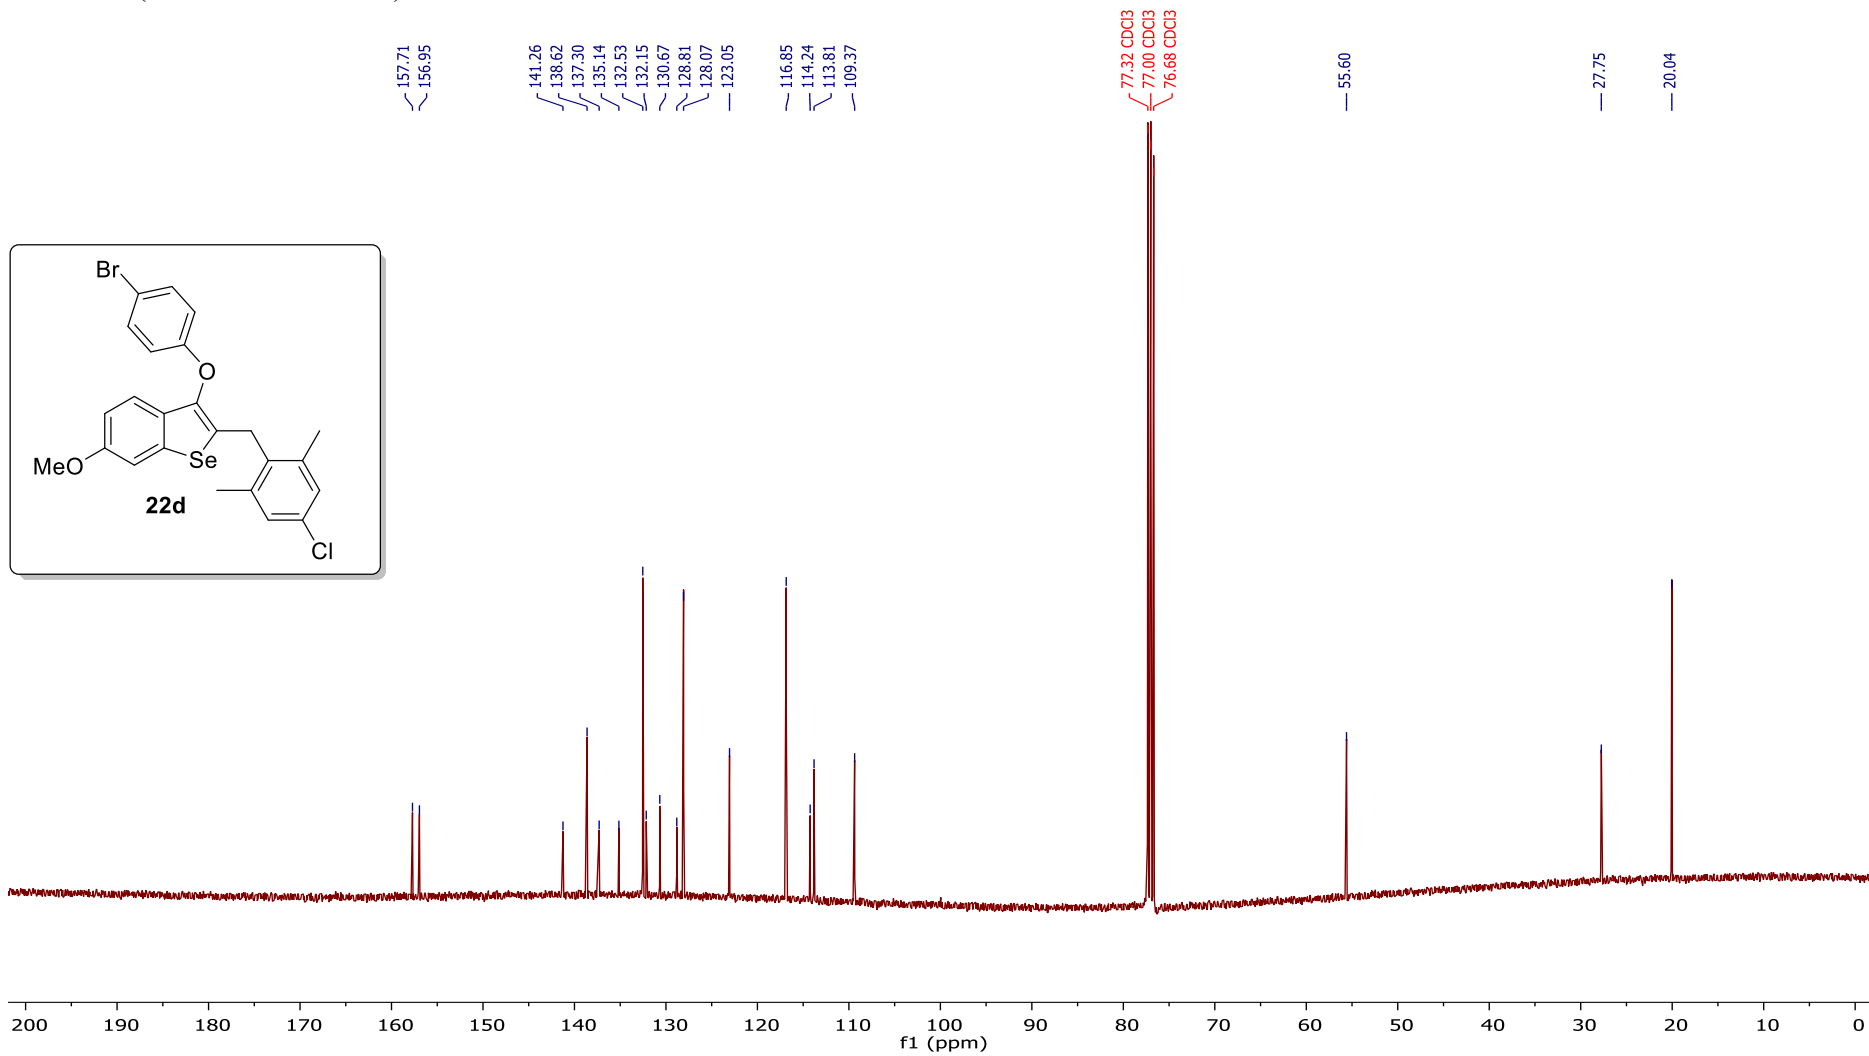

$^{77}\text{Se}$  NMR (76.37 MHz,  $\text{CDCl}_3$ ):

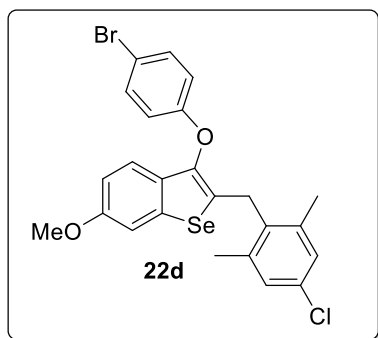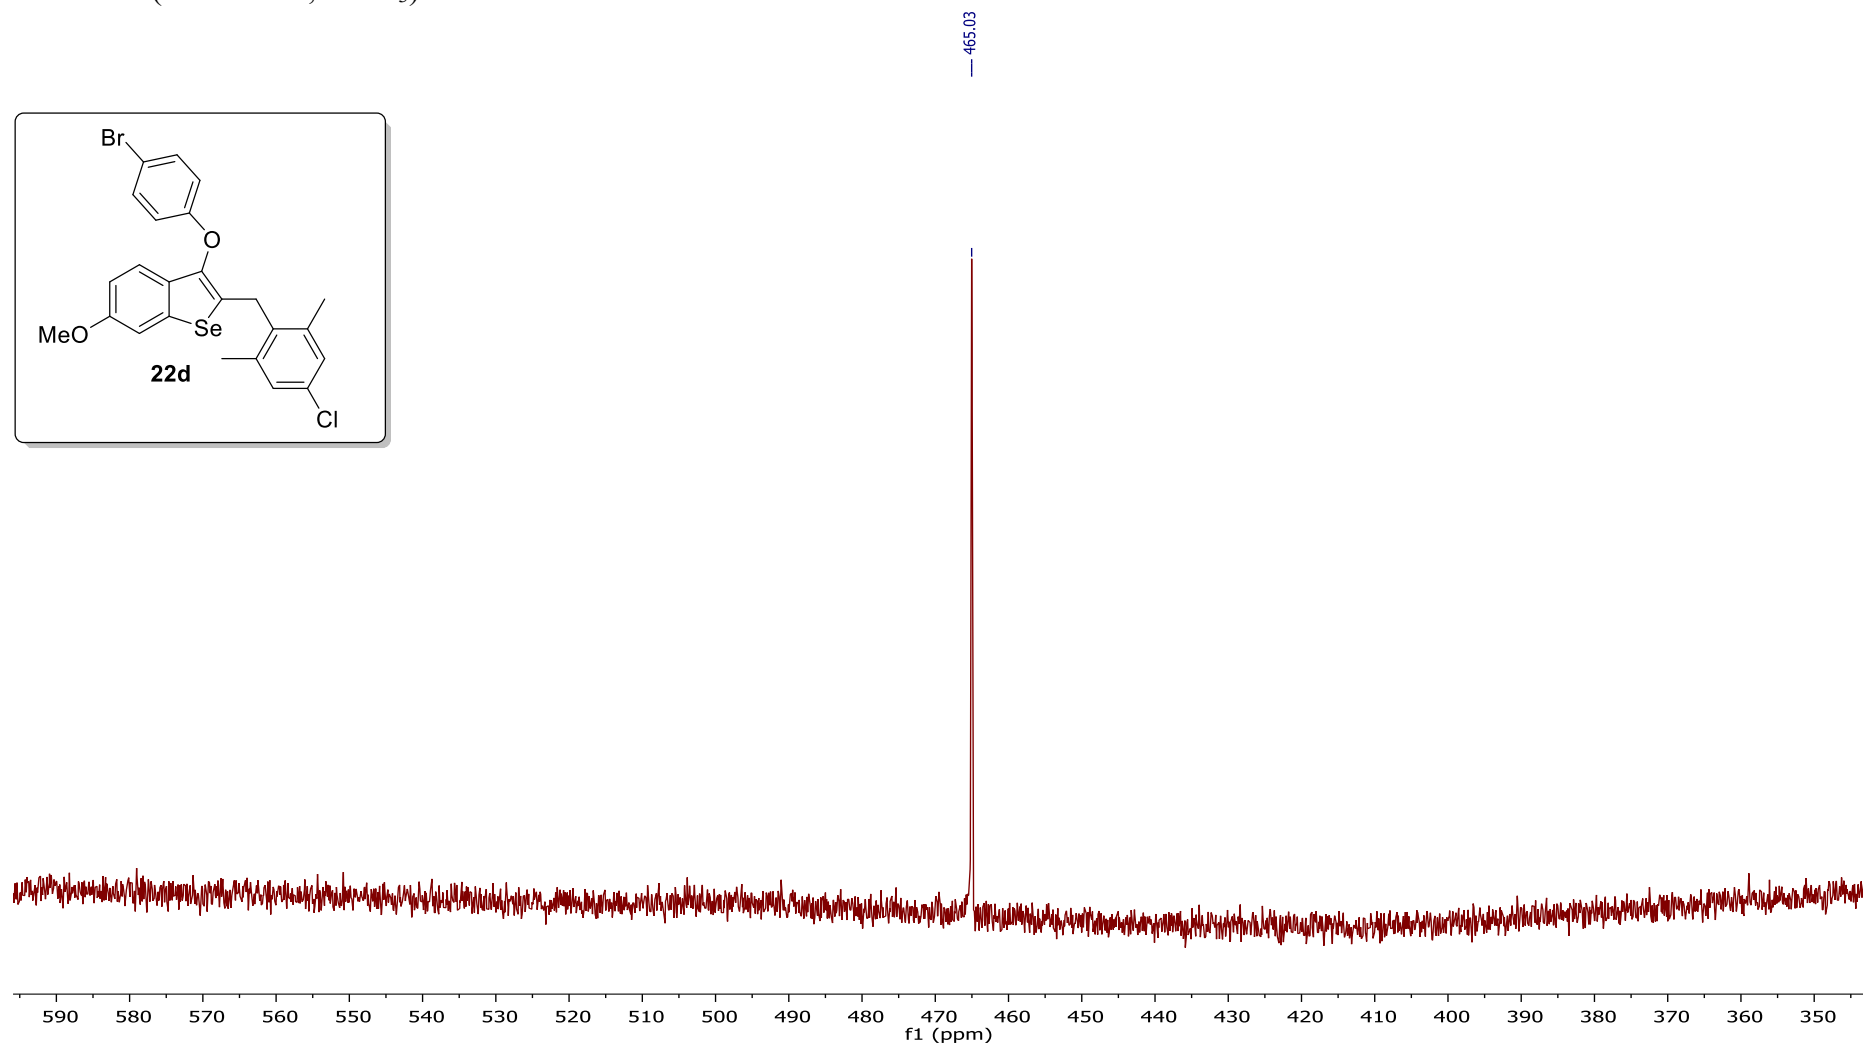

$^1\text{H}$  NMR (400 MHz,  $\text{CDCl}_3$ ):

7.56  
7.52  
7.44  
7.44  
7.43  
7.42  
7.41  
7.41  
7.41  
7.28  
7.27  
7.27  
7.26  $\text{CDCl}_3$   
7.24  
7.14  
7.13  
7.12  
7.11  
6.94  
6.94  
6.93  
6.92  
6.91  
6.88  
6.88  
6.86  
6.85  
6.82  
6.82  
6.81  
6.80  
6.79  
6.27  
6.23

4.03  
4.02  
4.01  
3.83  
3.78

1.59 H<sub>2</sub>O  
1.53

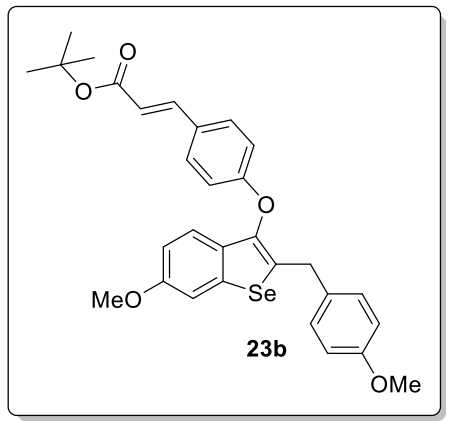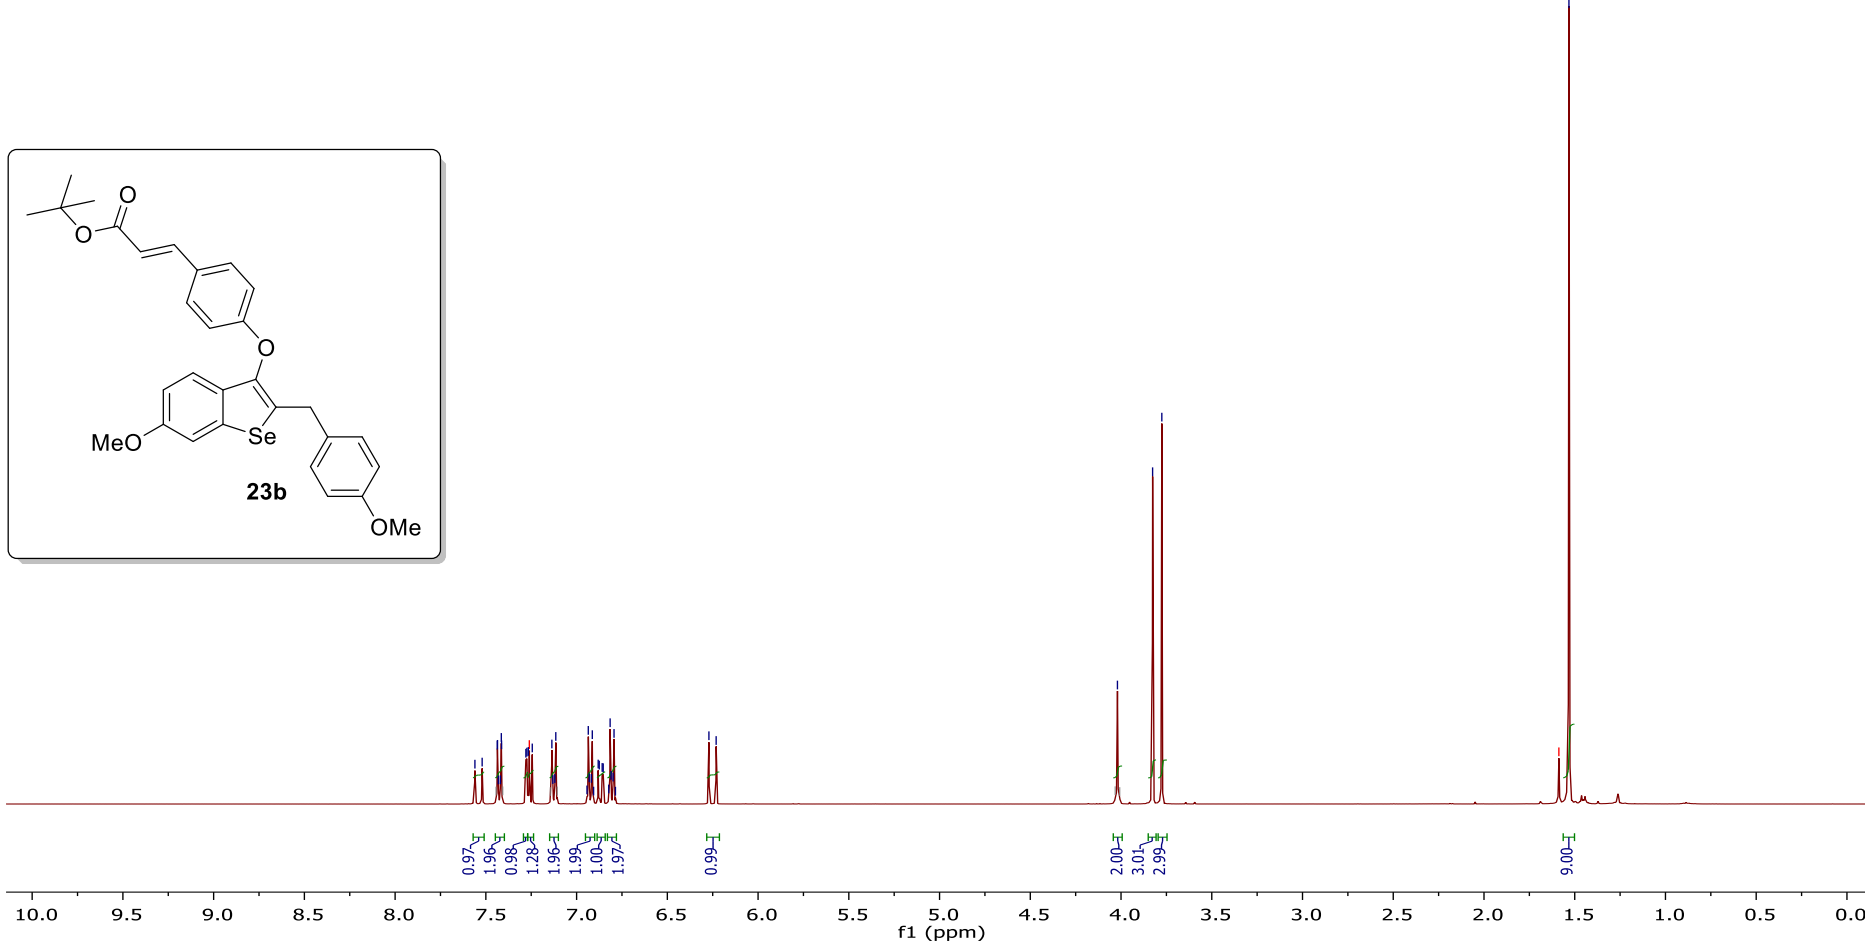



$^{13}\text{C}$  NMR (100.6 MHz,  $\text{CDCl}_3$ ):

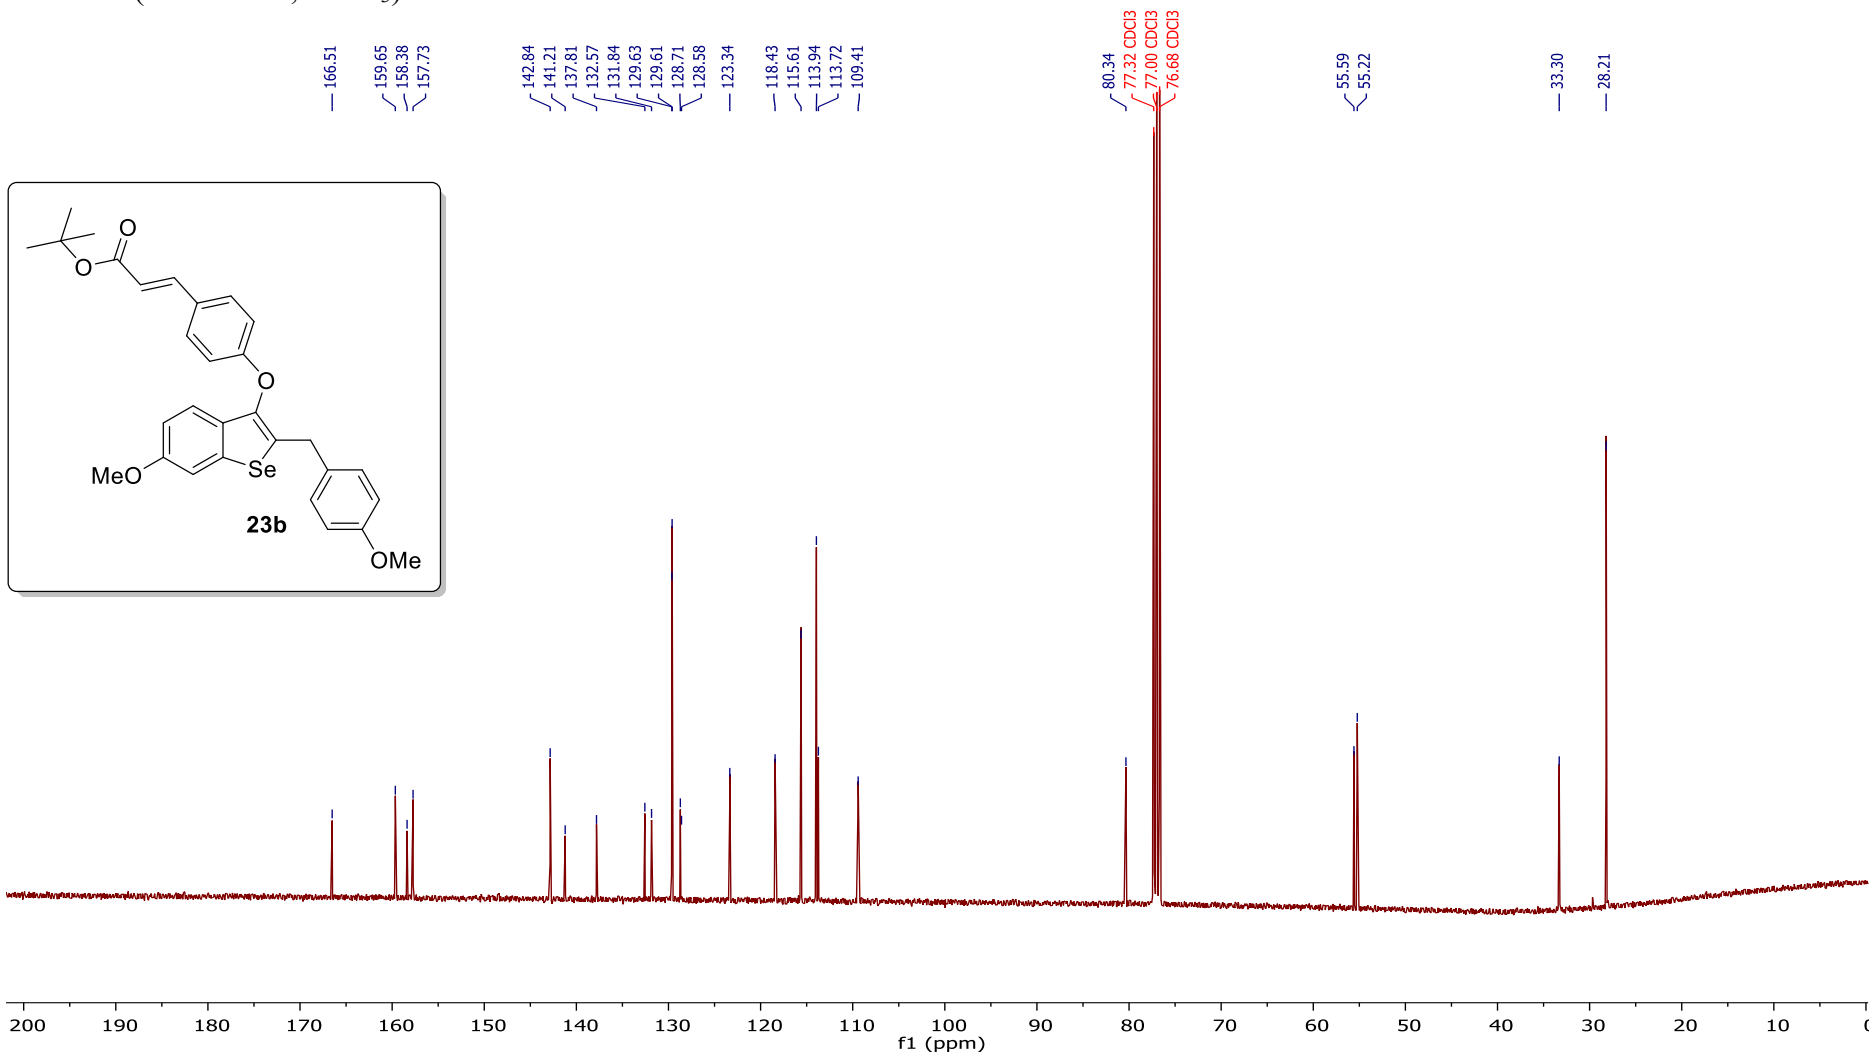

$^{77}\text{Se}$  NMR (76.37 MHz,  $\text{CDCl}_3$ ):

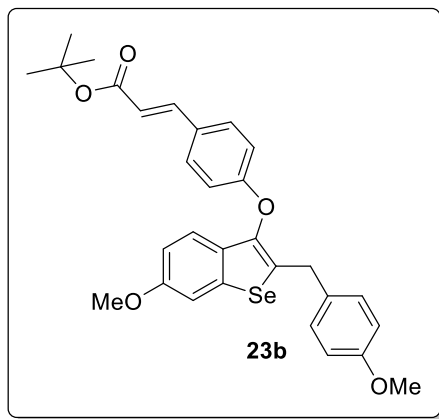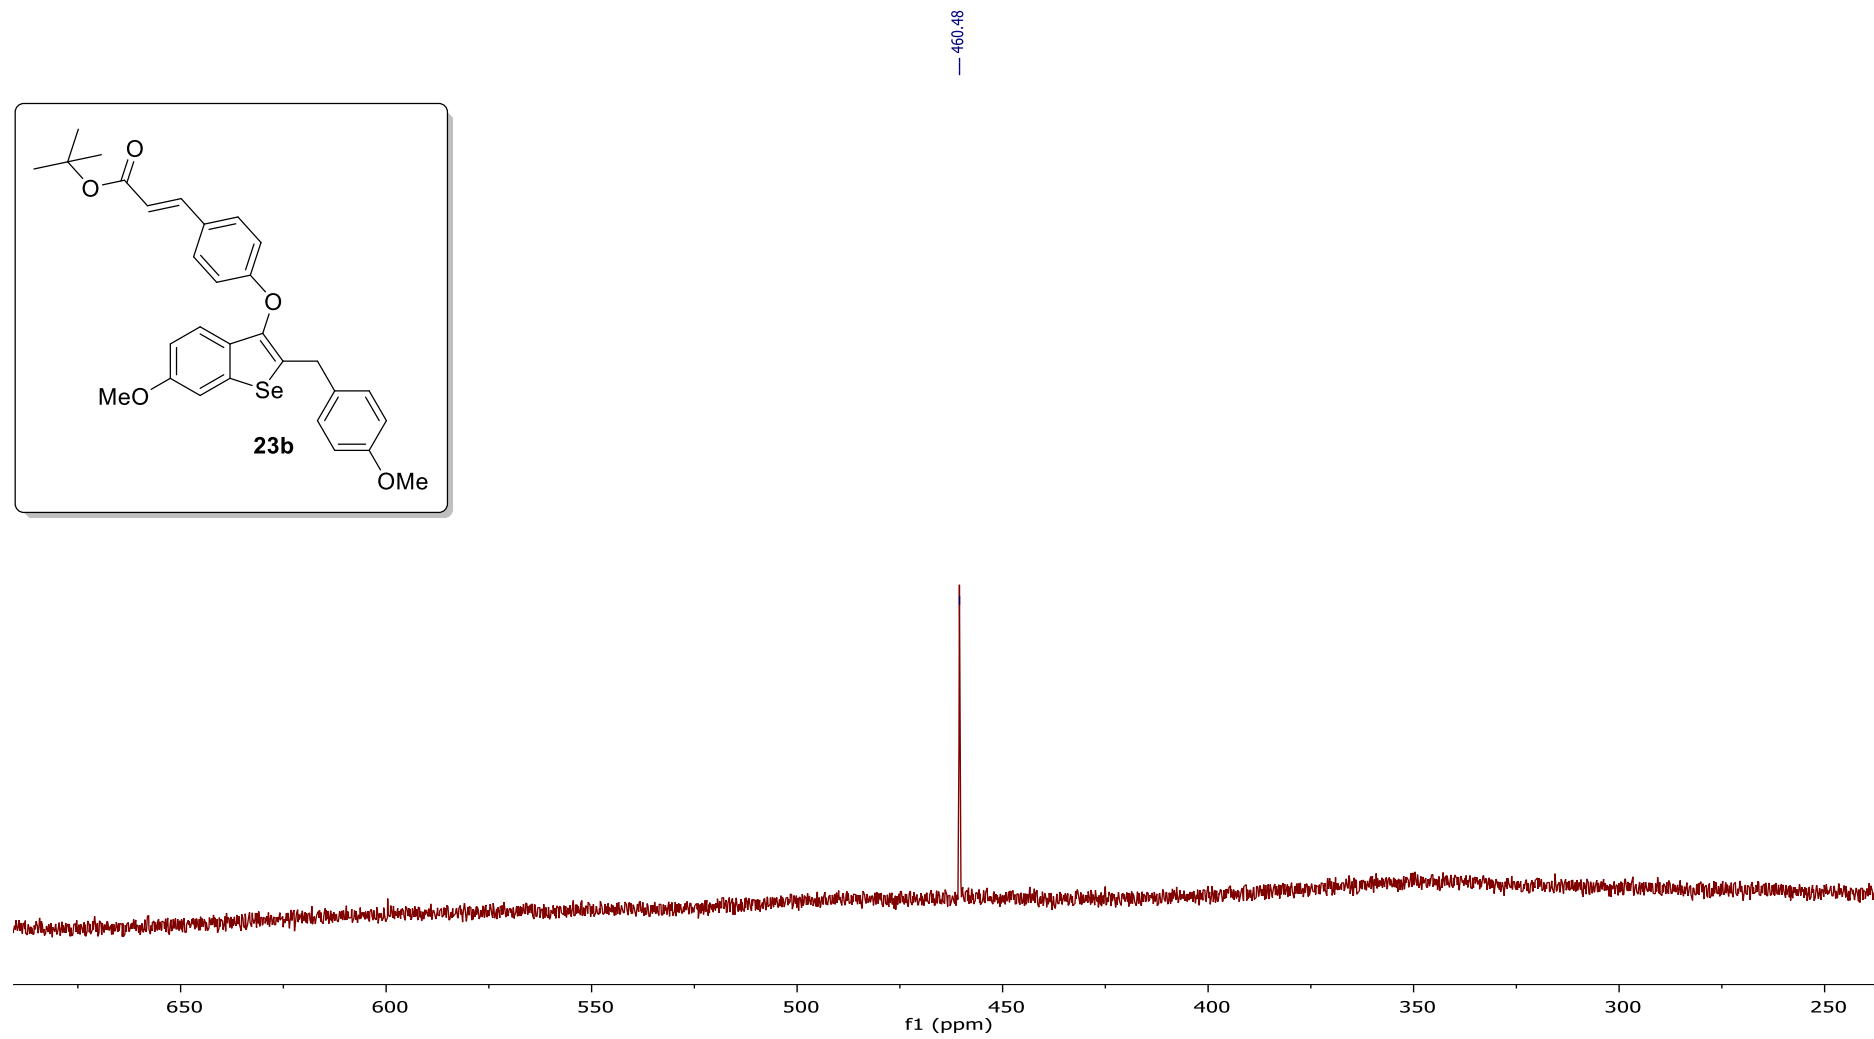

<sup>1</sup>H NMR (400 MHz, CDCl<sub>3</sub>):

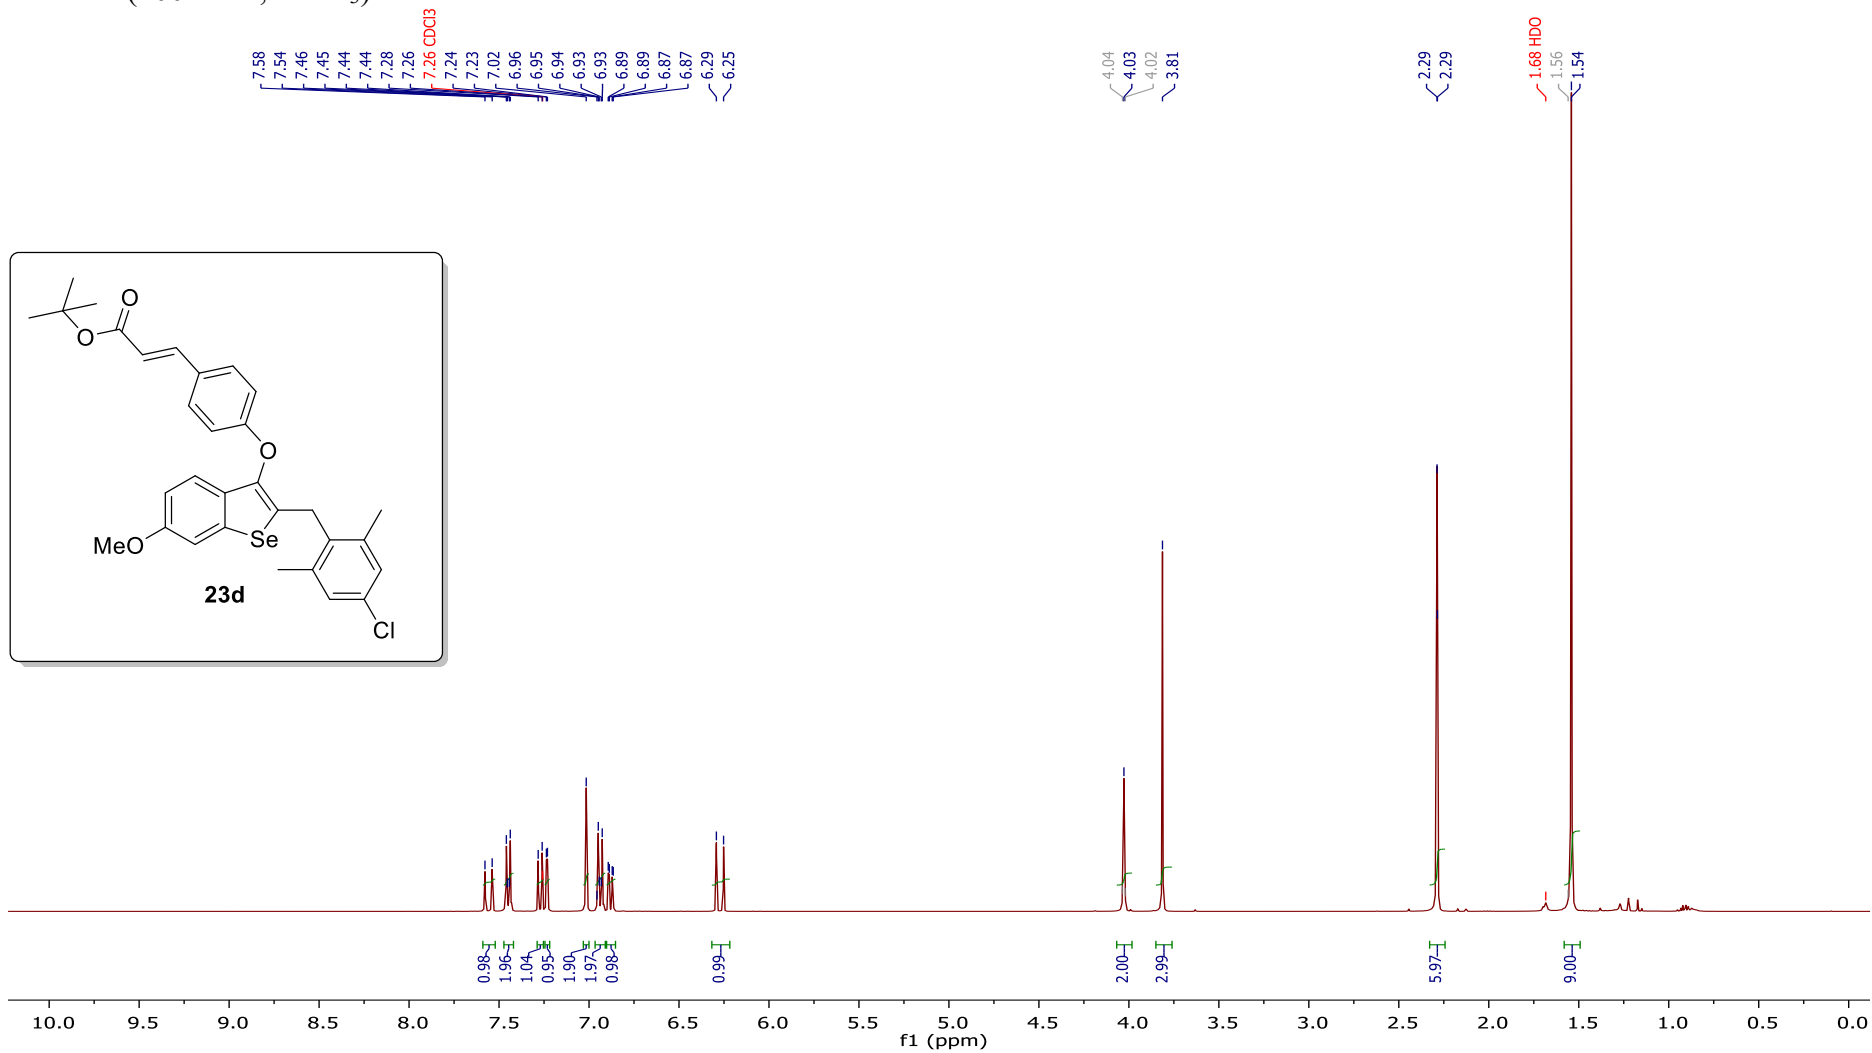

$^{13}\text{C}$  NMR (100.6 MHz,  $\text{CDCl}_3$ ):

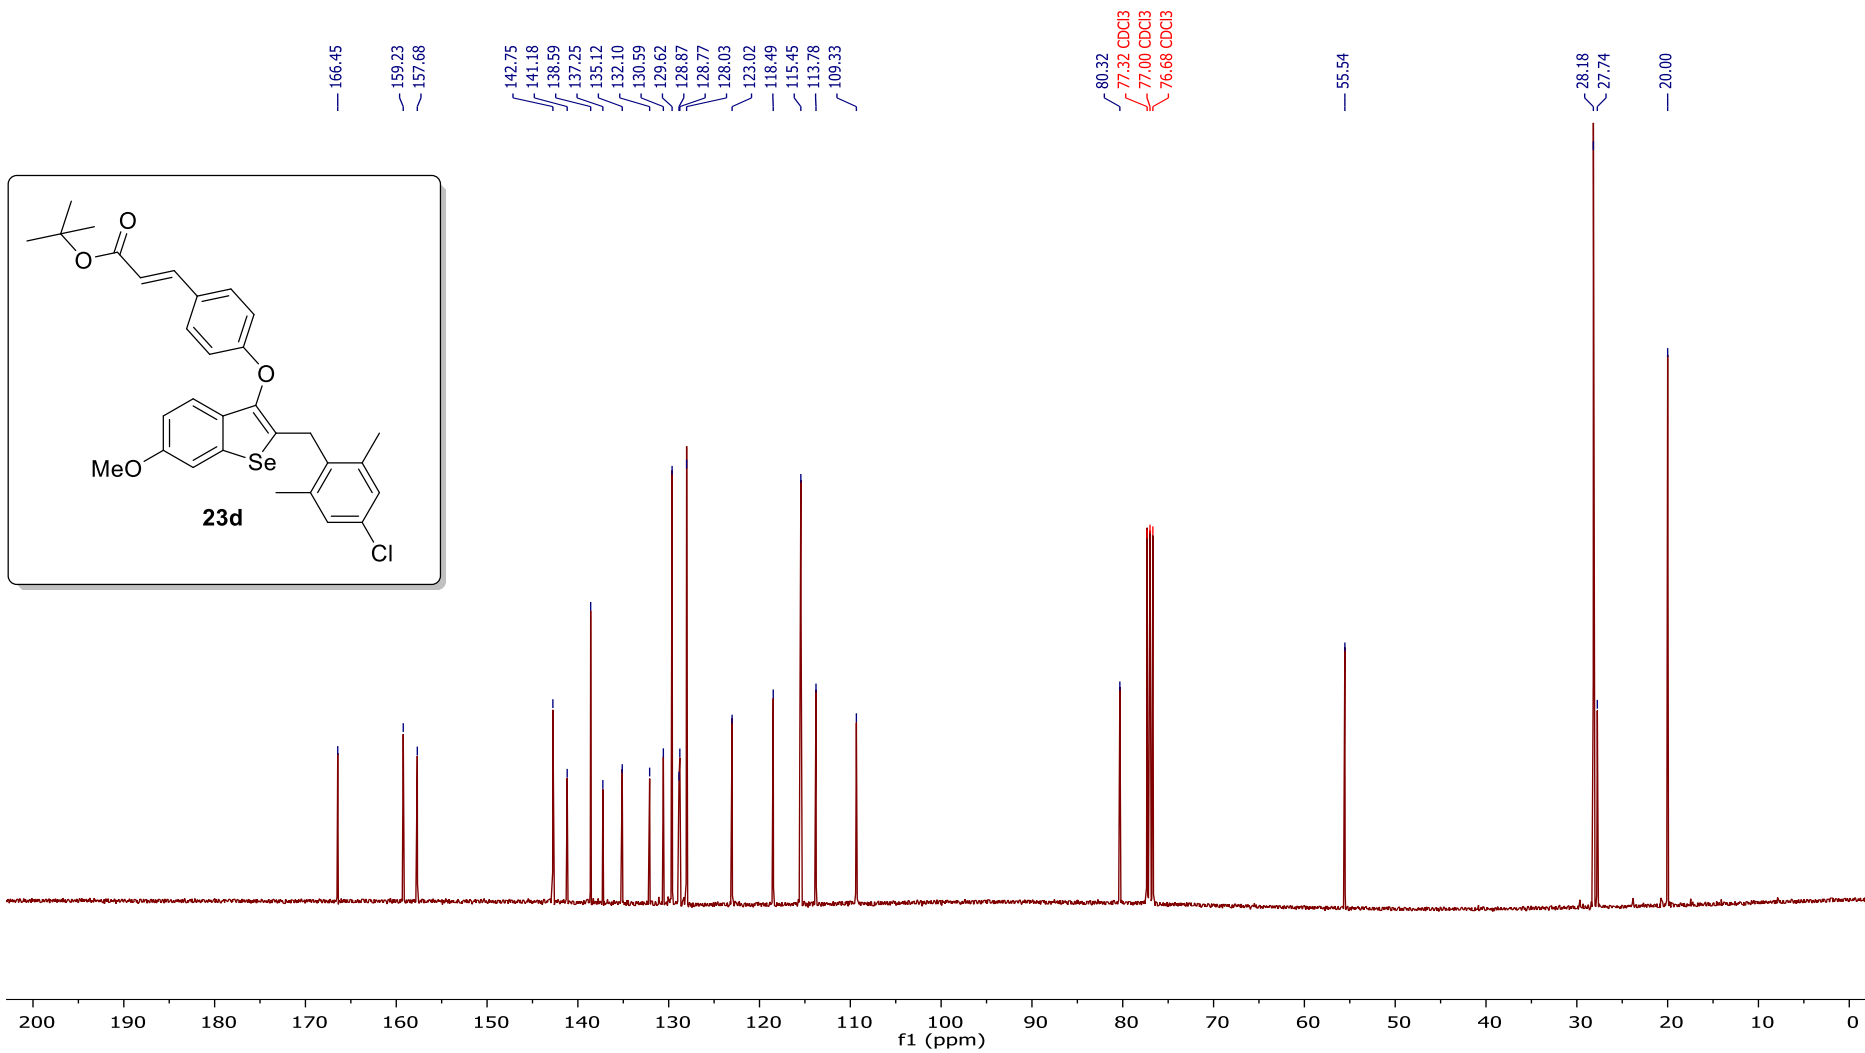

$^{77}\text{Se}$  NMR (76.37 MHz,  $\text{CDCl}_3$ ):

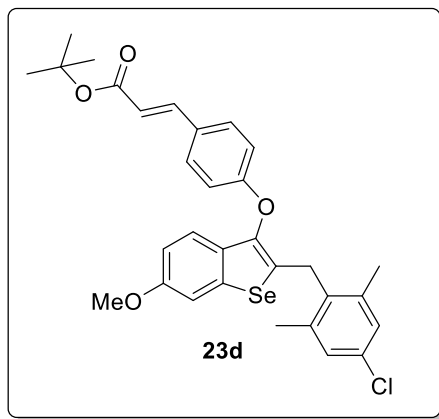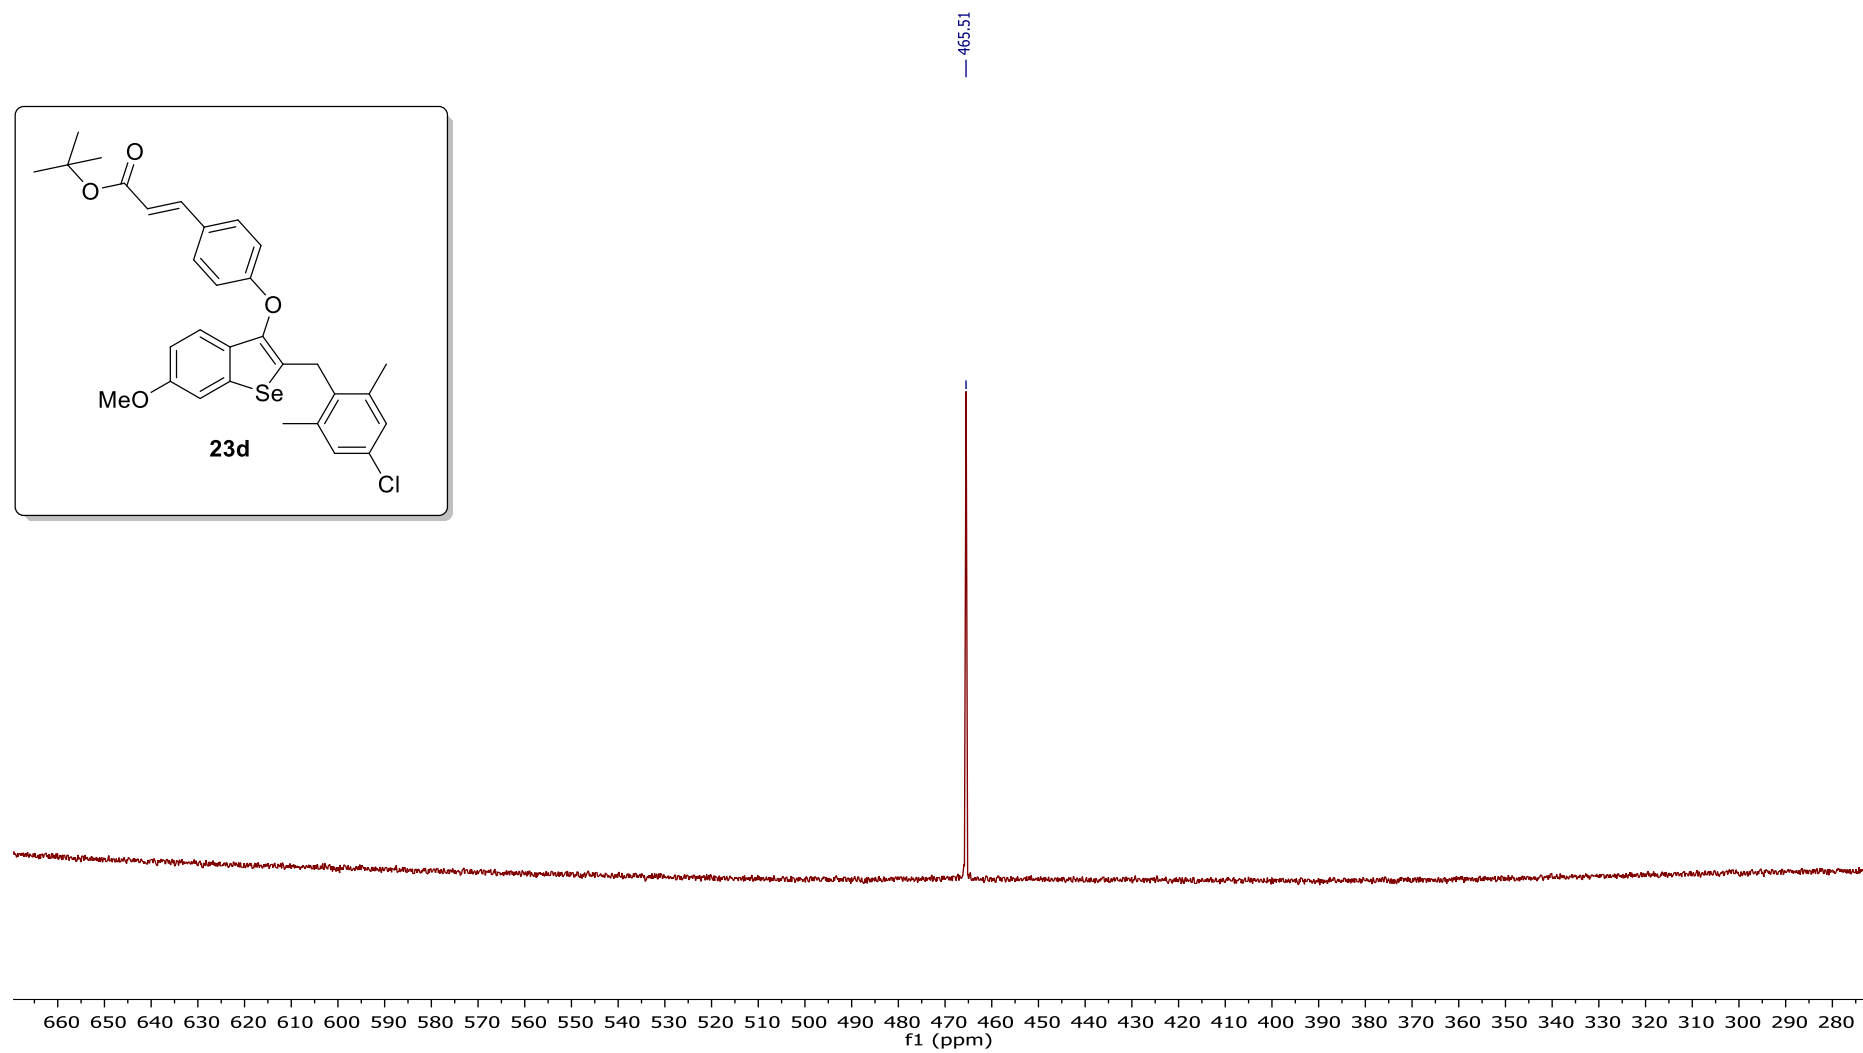

$^1\text{H}$  NMR (400 MHz, DMSO- $d_6$ ):

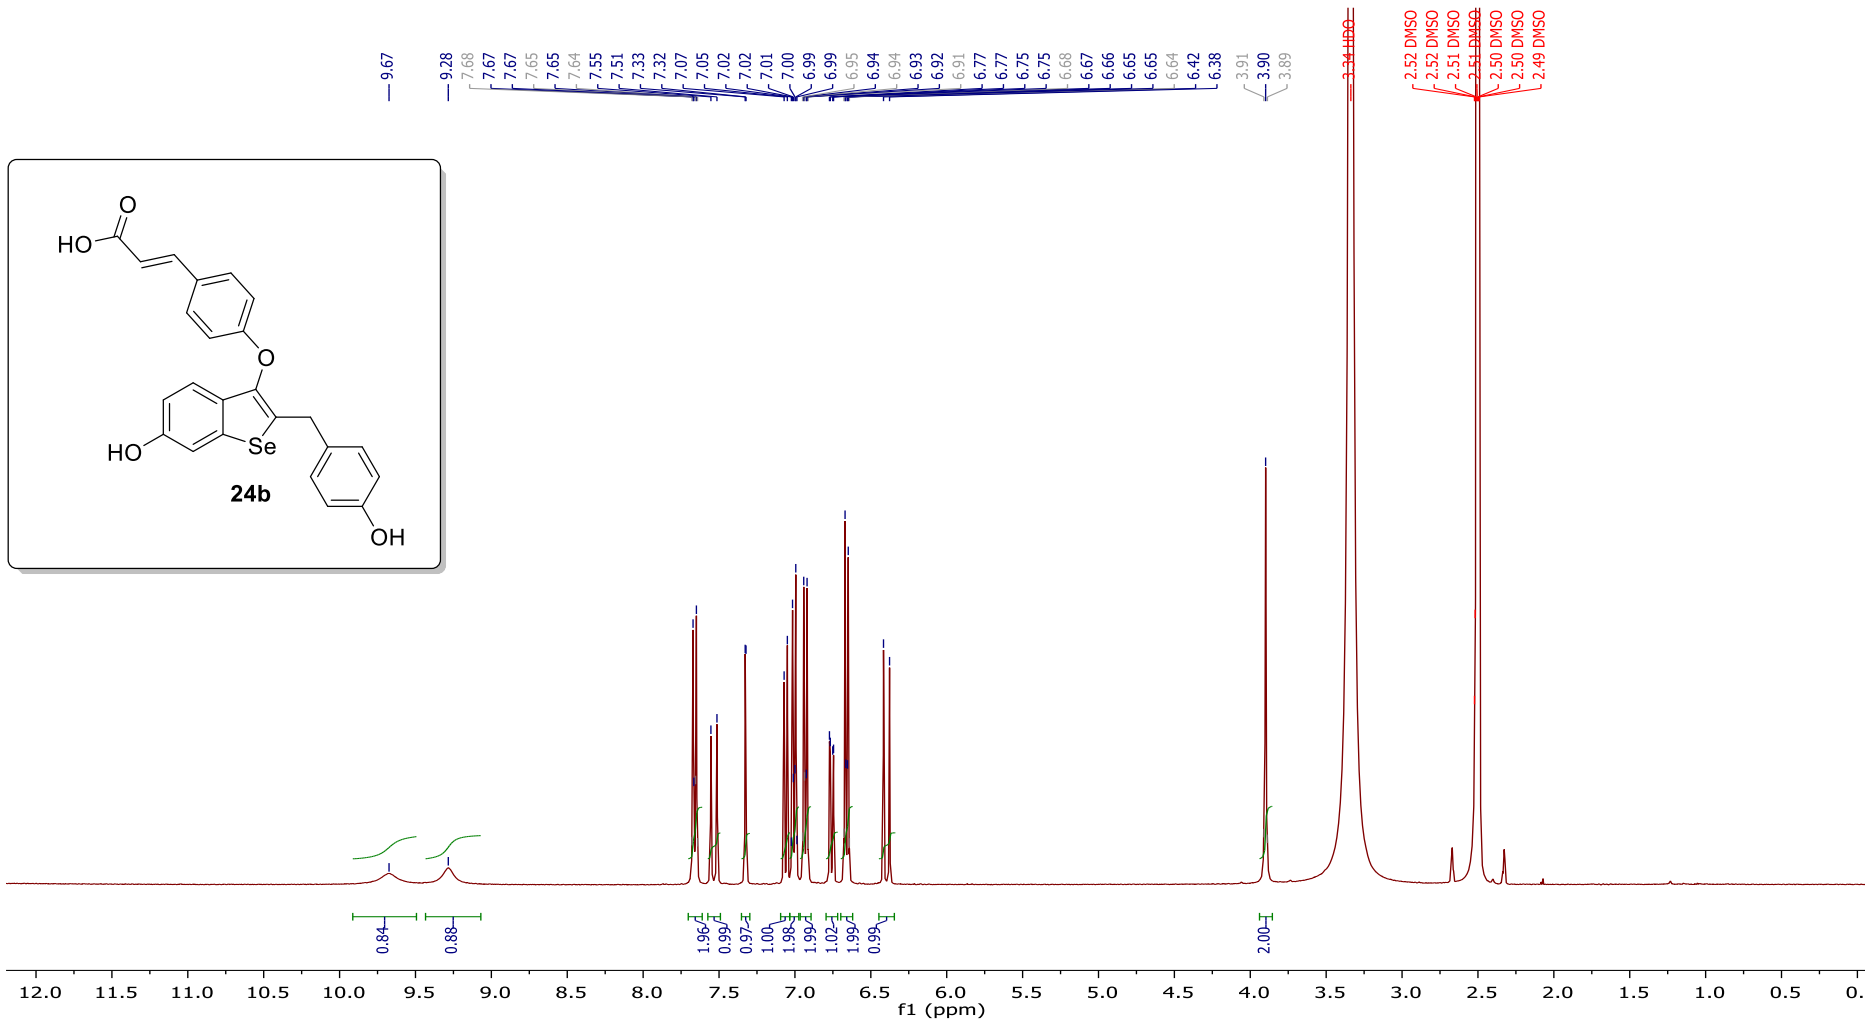

$^{13}\text{C}$  NMR (100.6 MHz, DMSO- $d_6$ ):

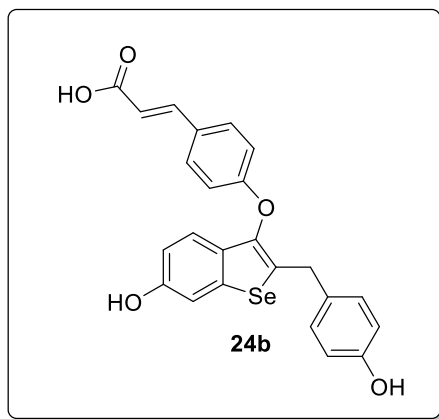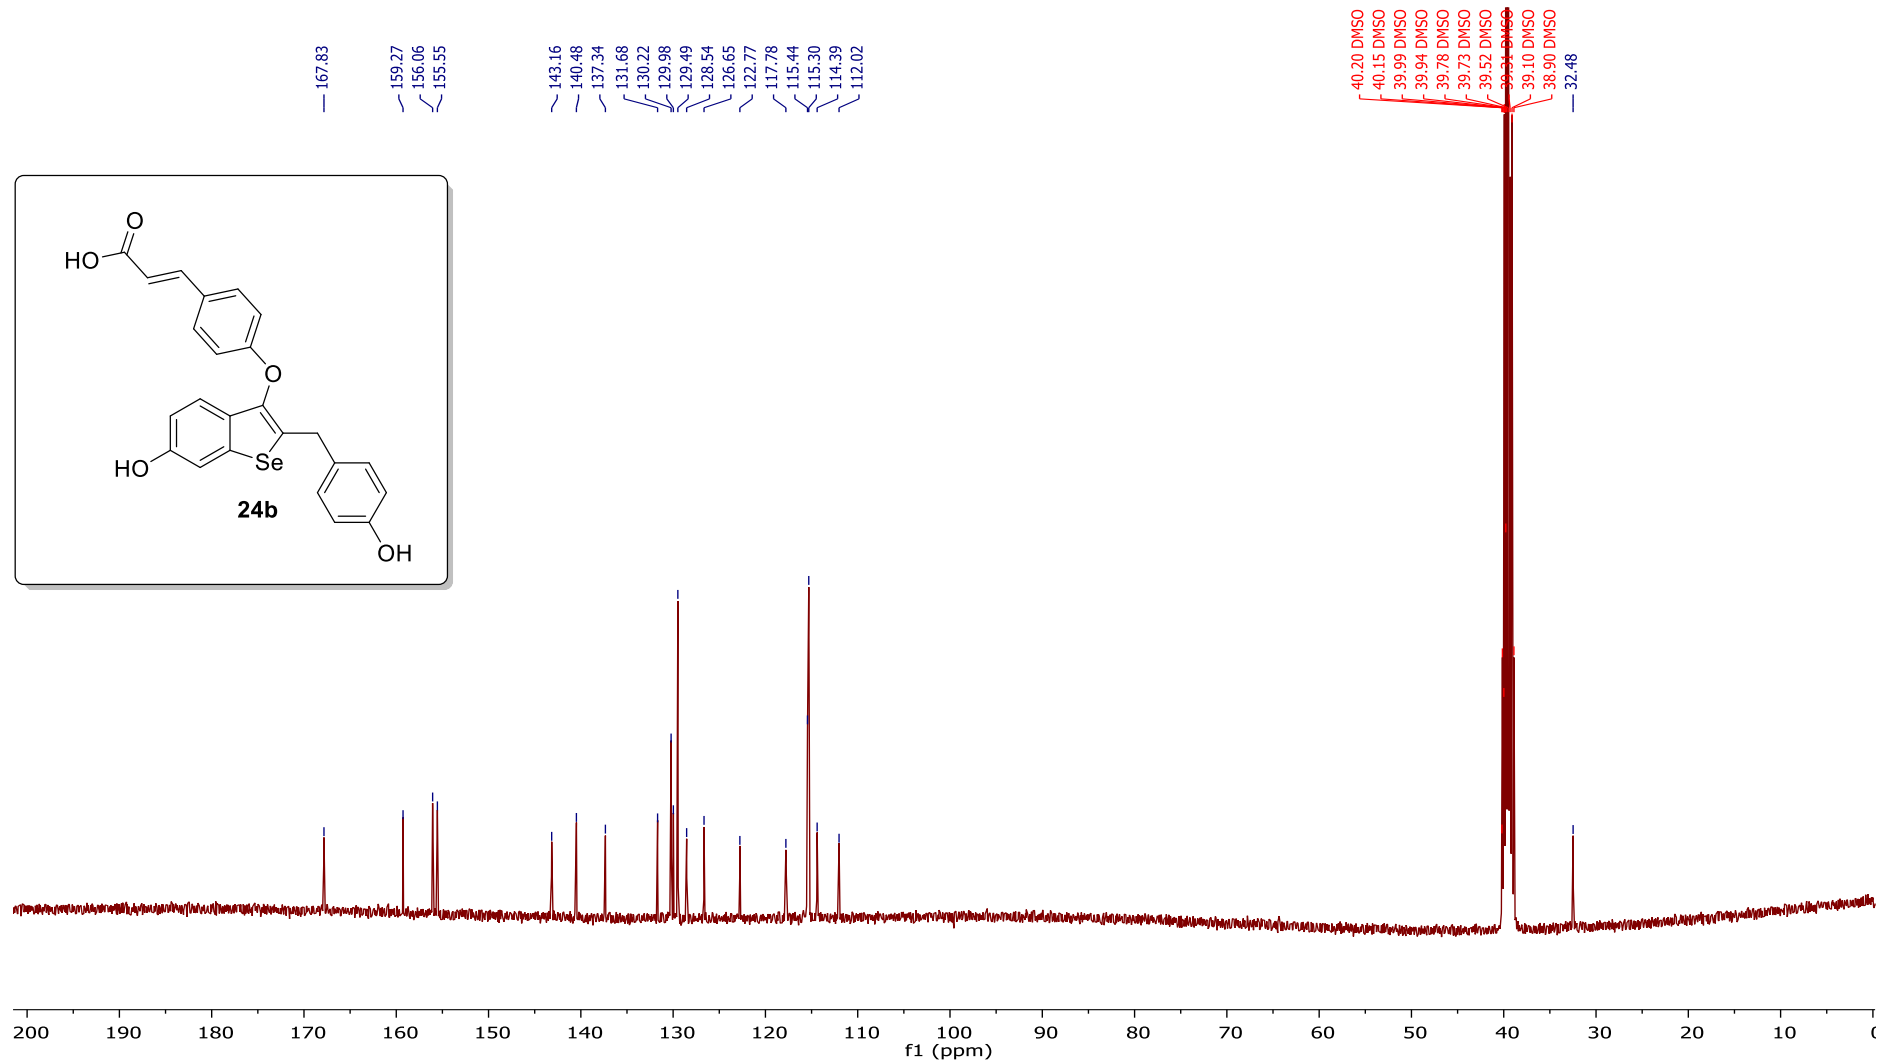

$^{77}\text{Se}$  NMR (76.37 MHz, DMSO- $d_6$ ):

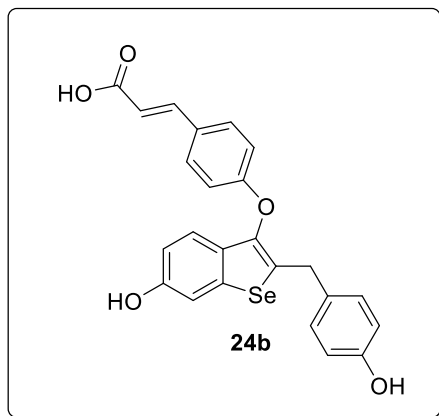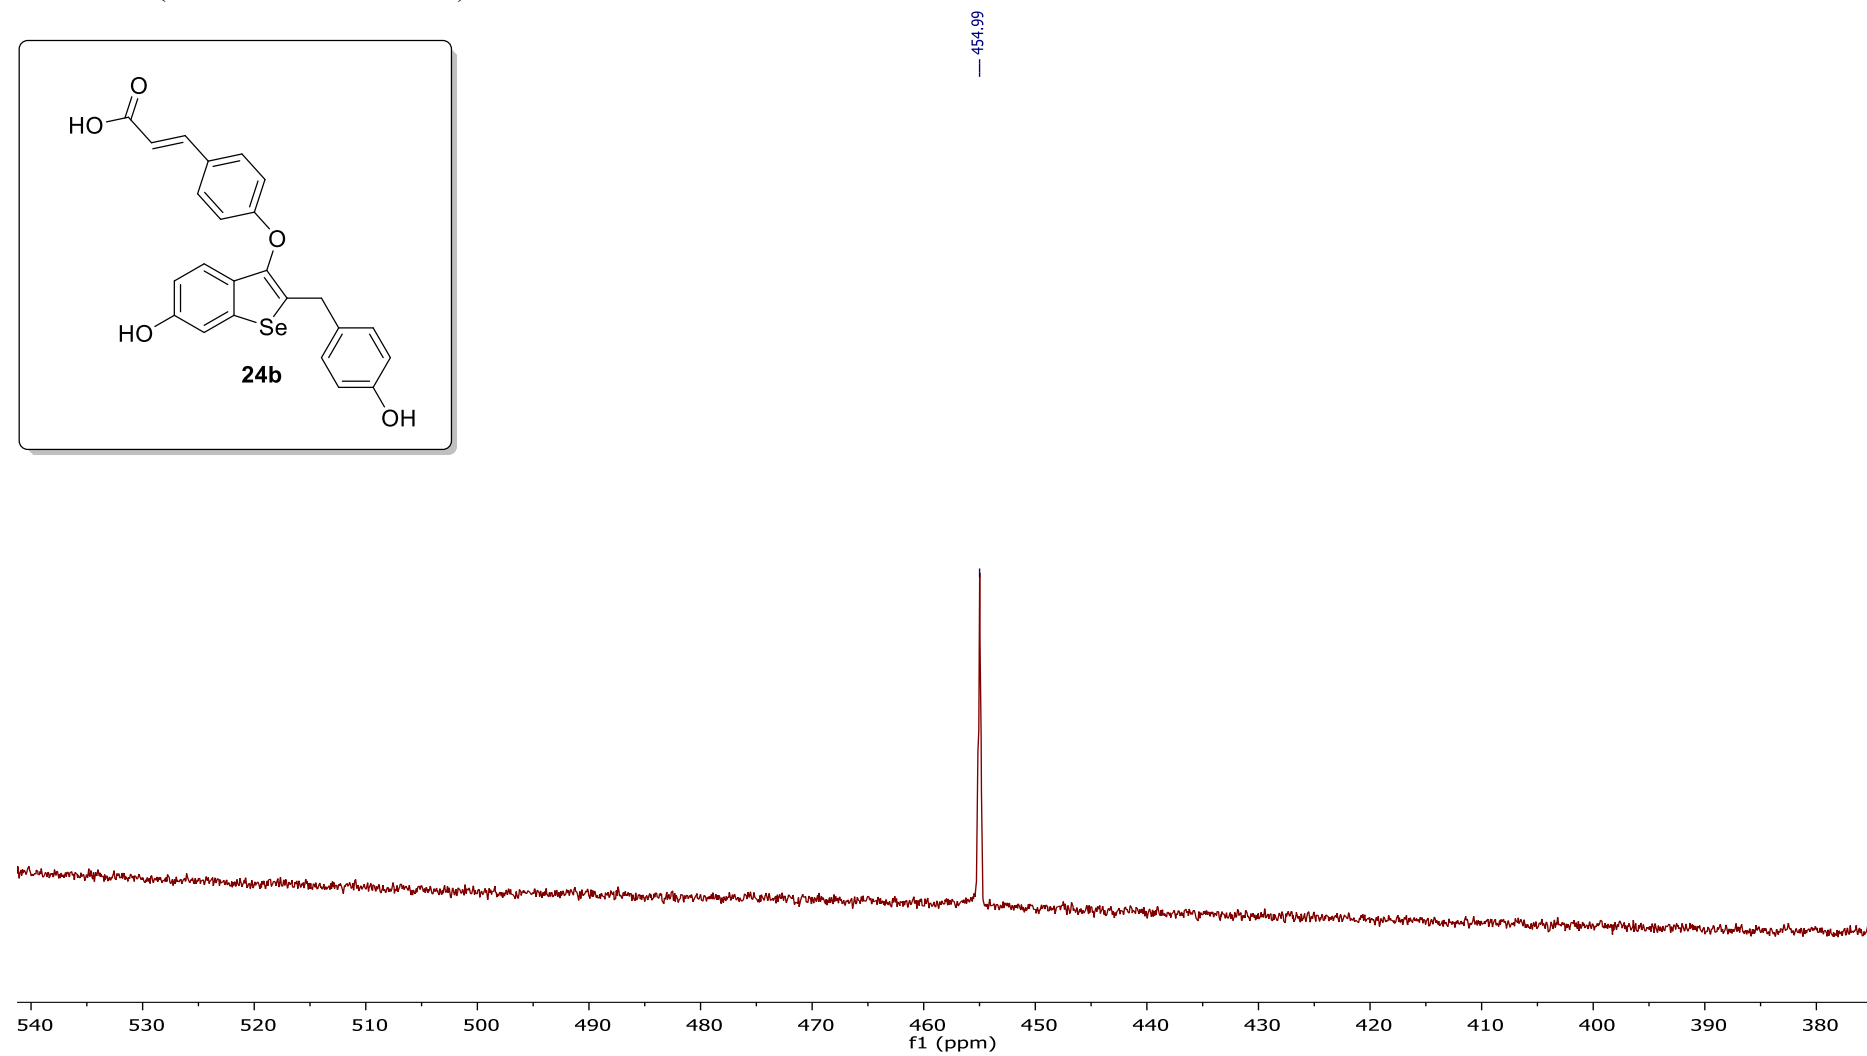



$^1\text{H}$  NMR (400 MHz, DMSO- $d_6$ ):

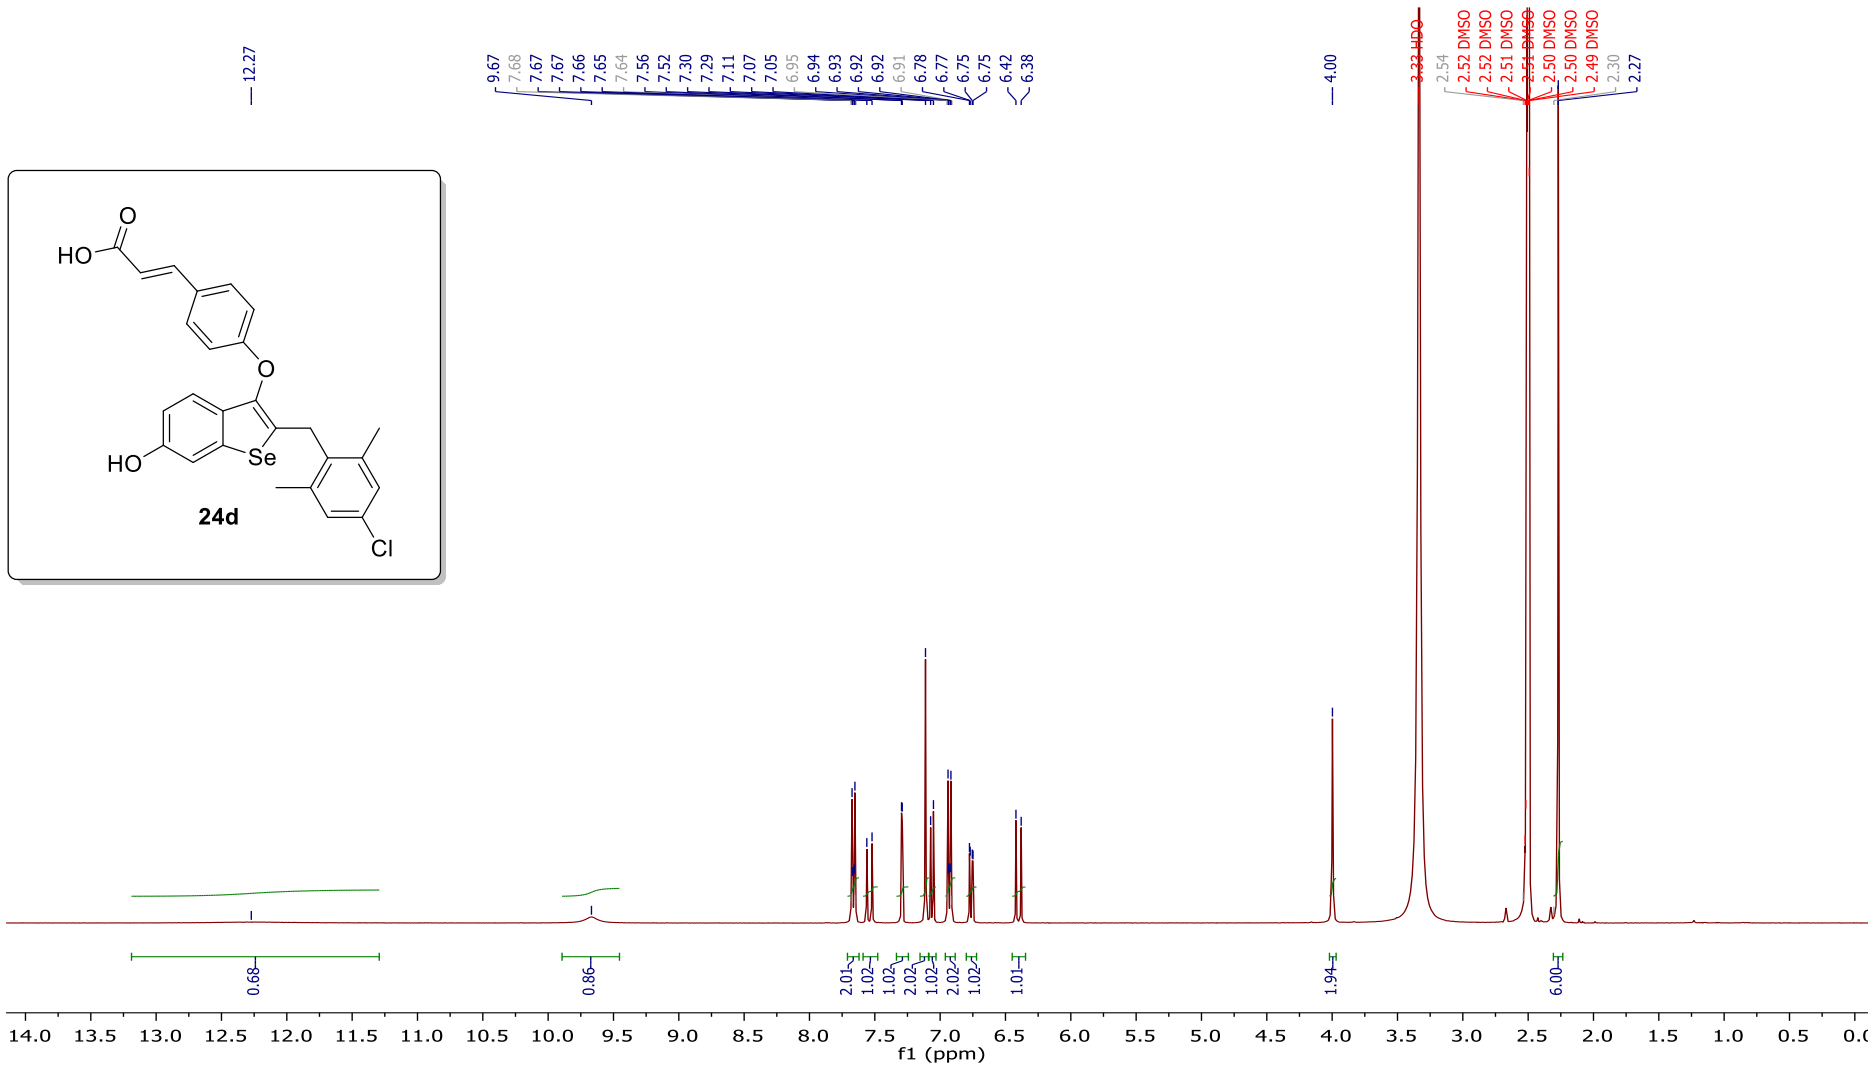

$^{13}\text{C}$  NMR (100.6 MHz, DMSO- $d_6$ ):

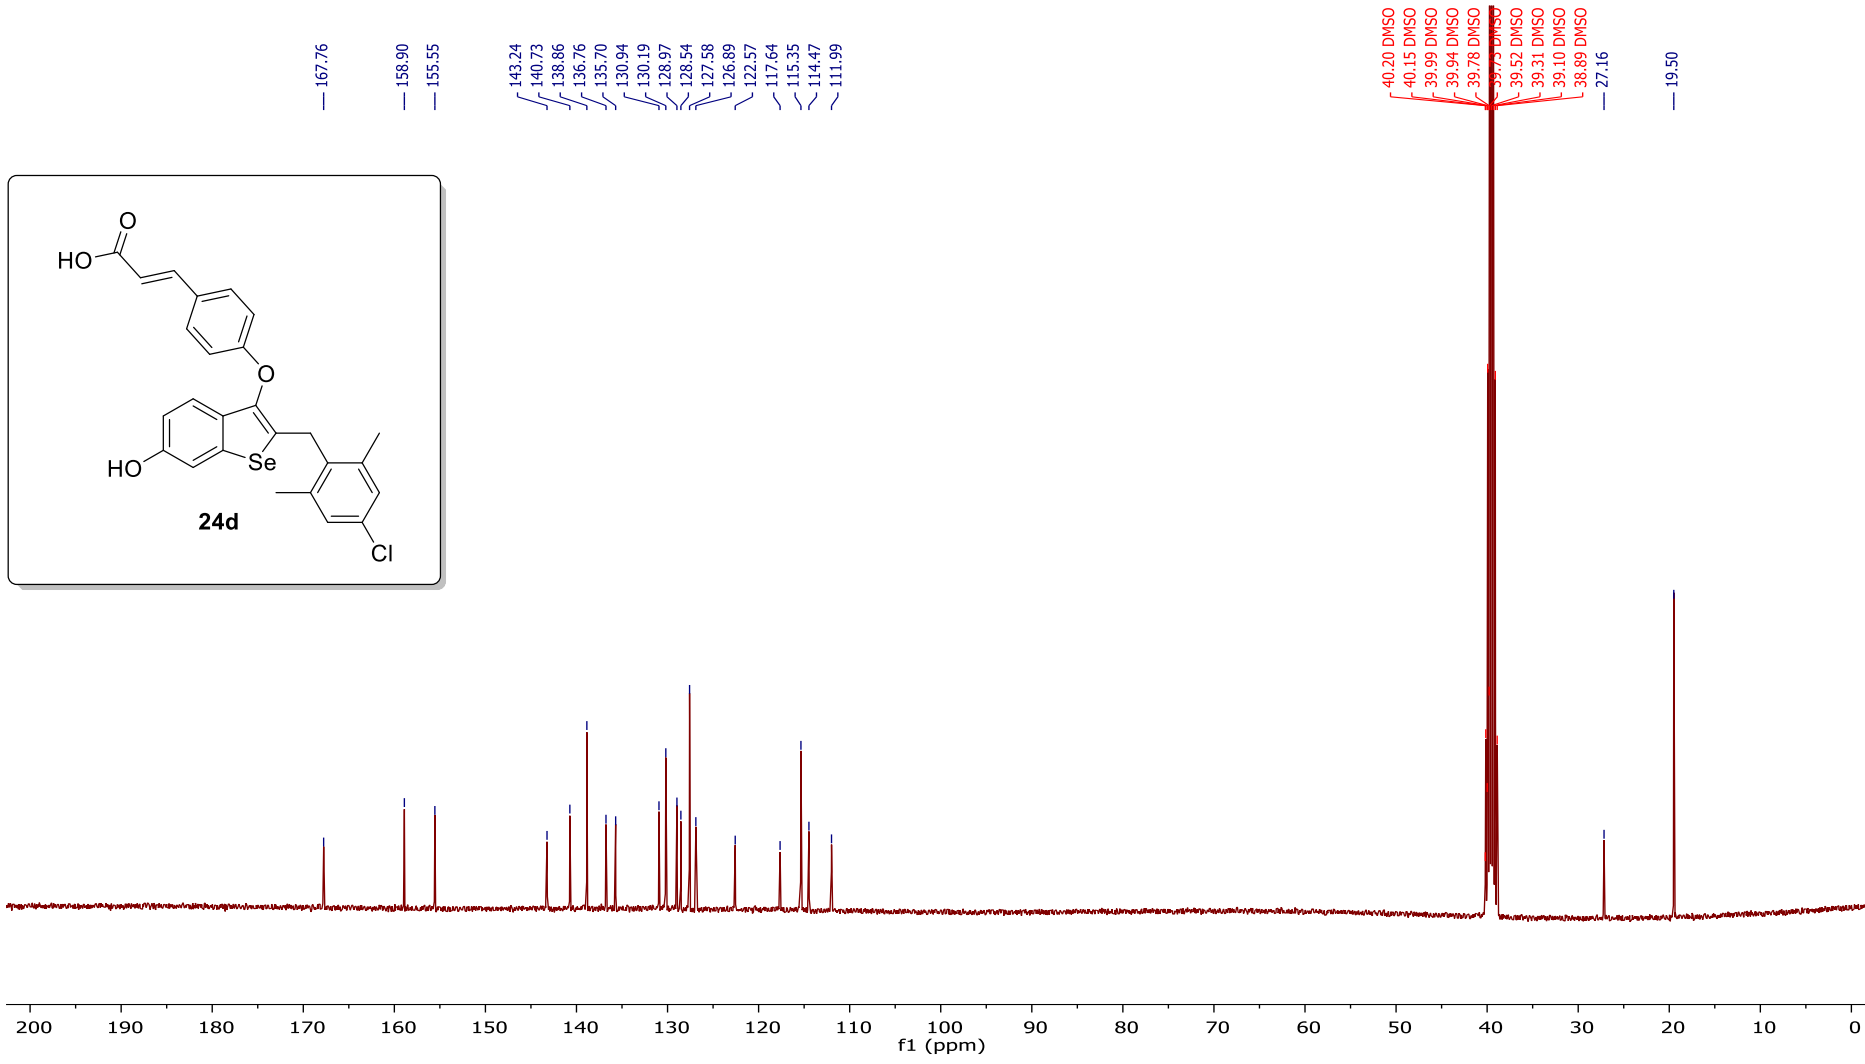

$^{77}\text{Se}$  NMR (76.37 MHz, DMSO- $d_6$ ):

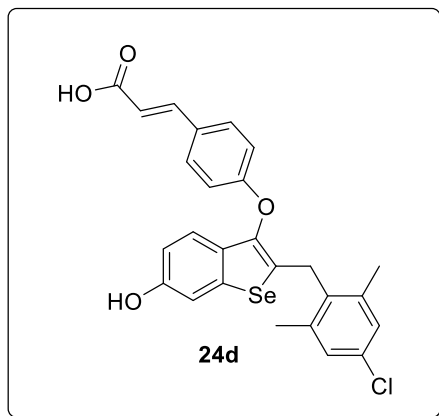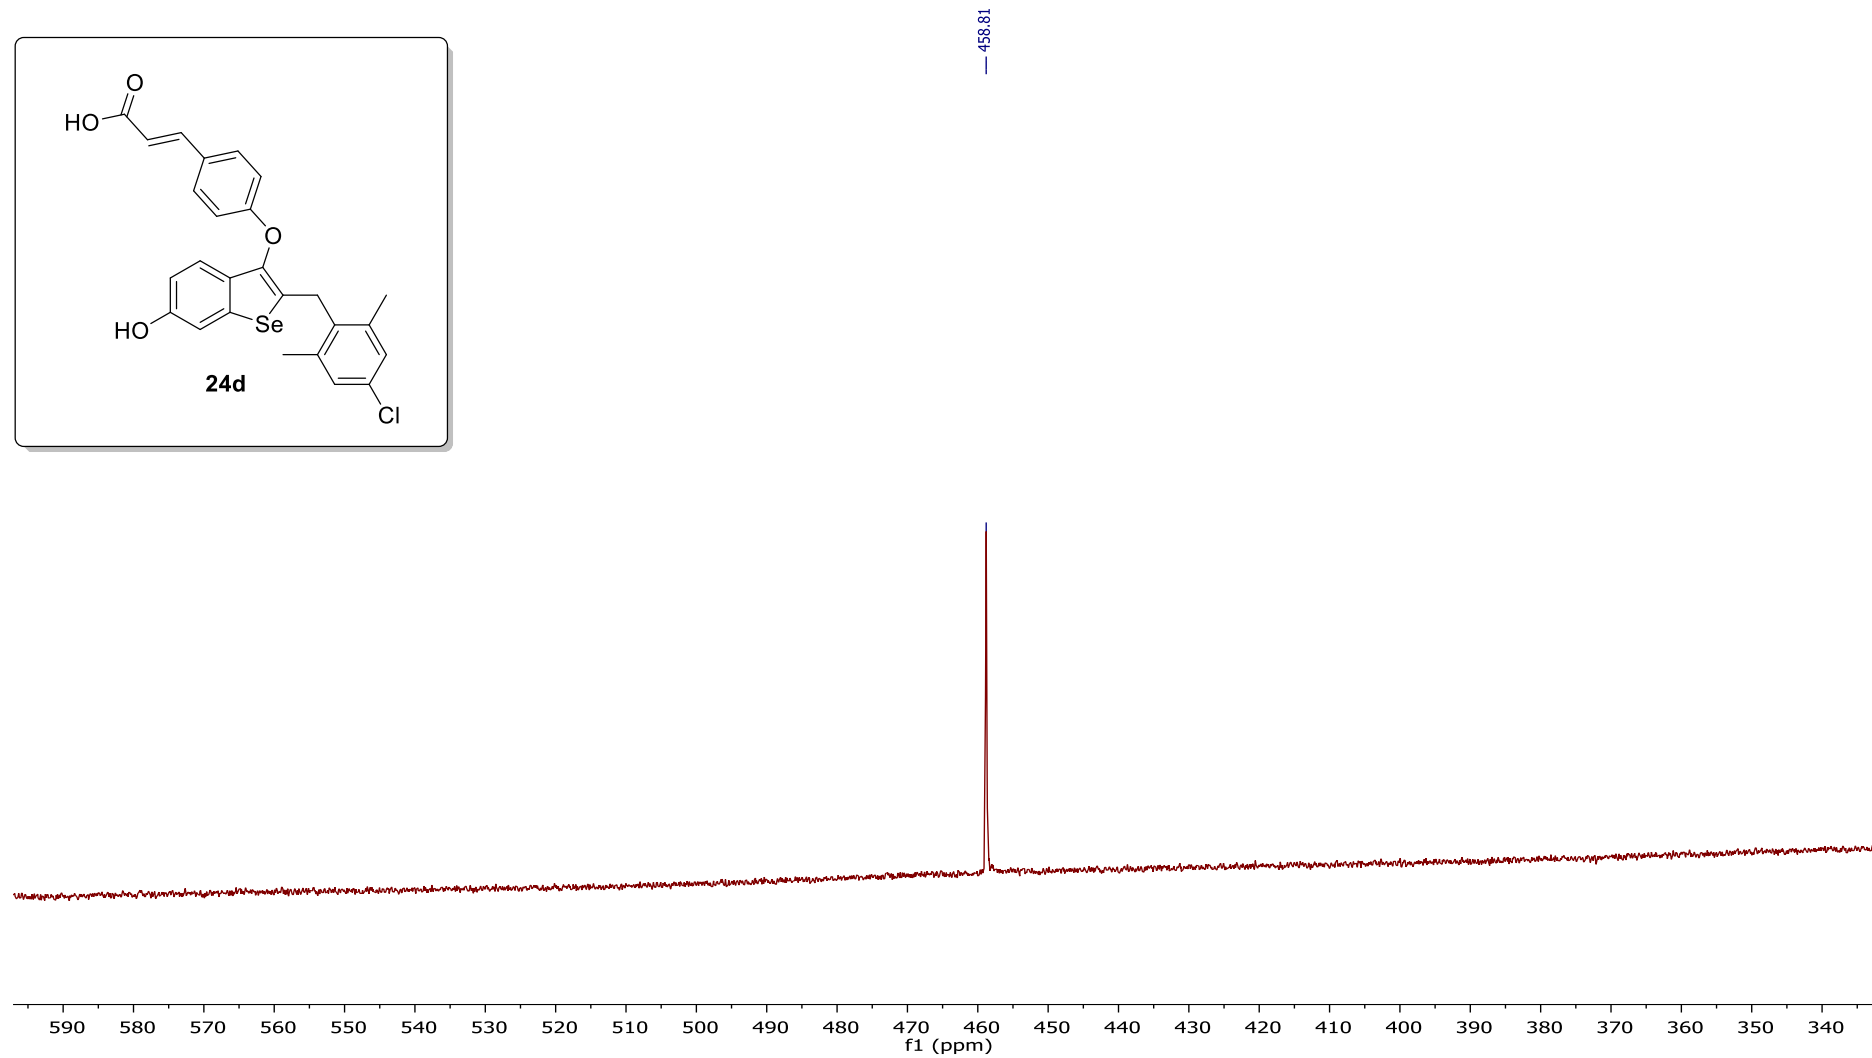

$^1\text{H}$  NMR (400 MHz,  $\text{CDCl}_3$ ):

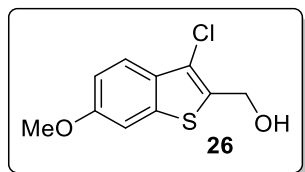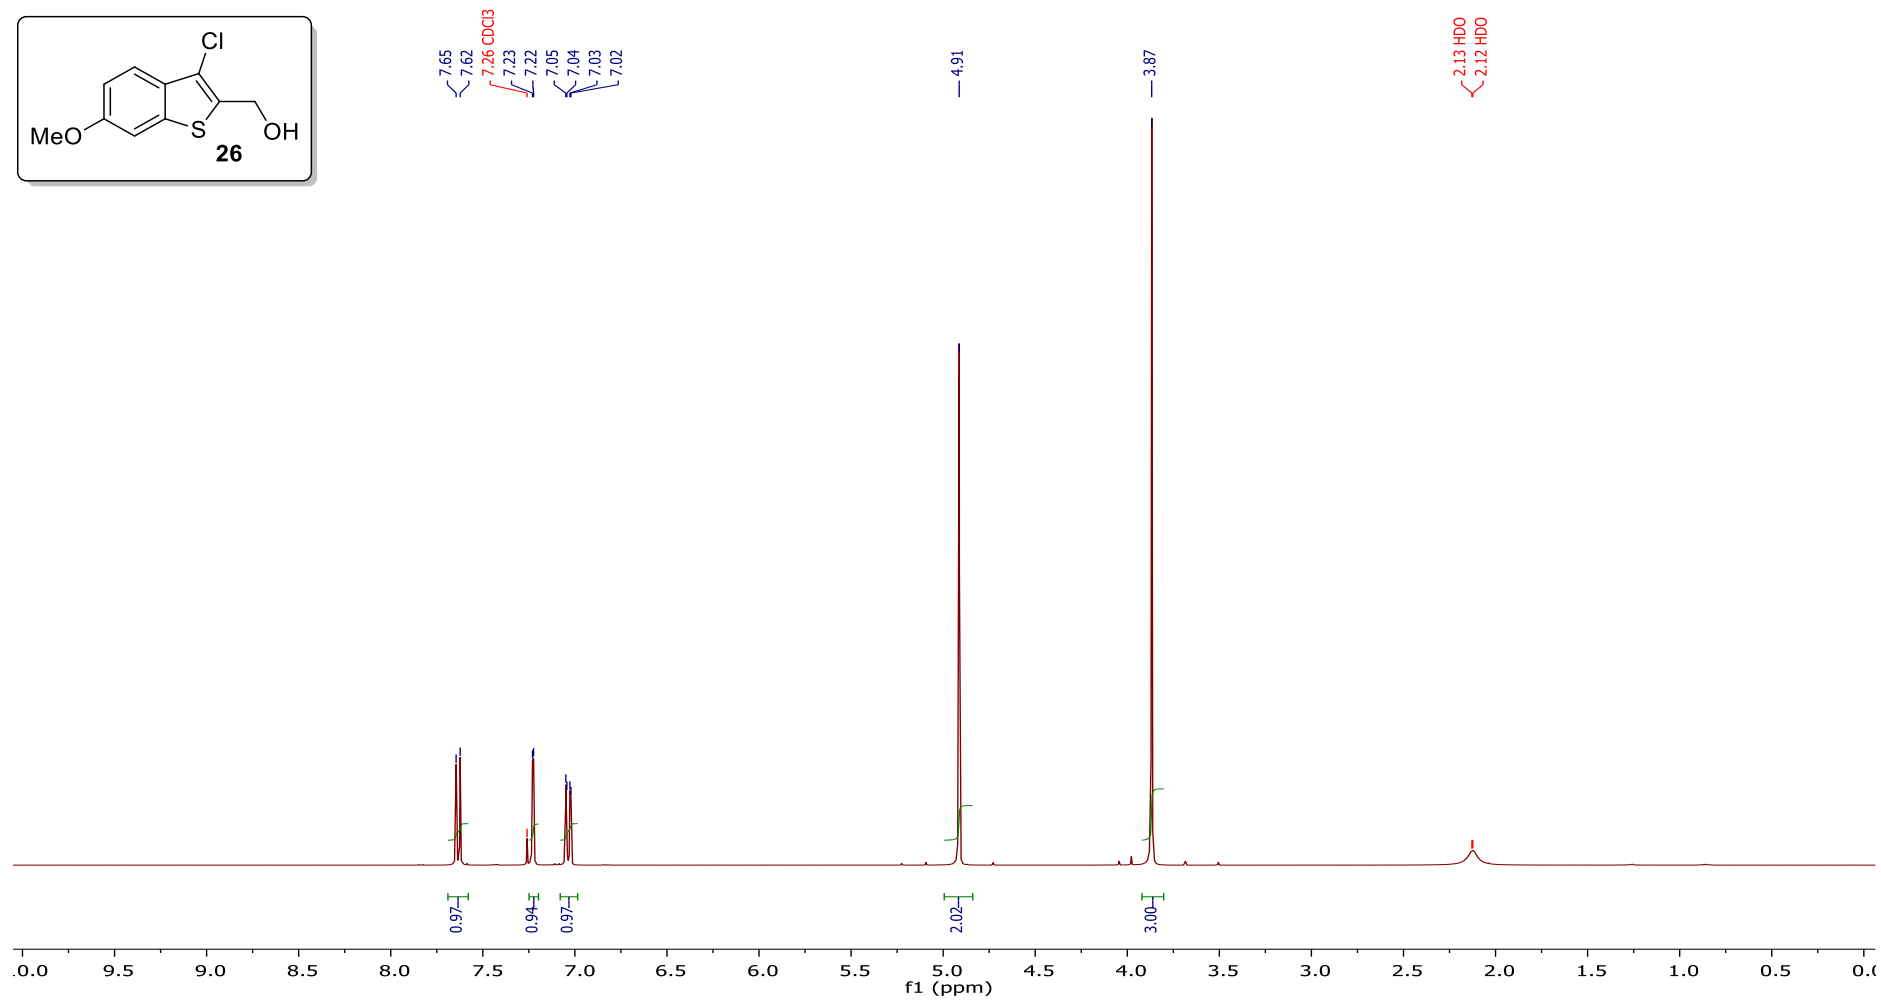

$^{13}\text{C}$  NMR (100.6 MHz,  $\text{CDCl}_3$ ):

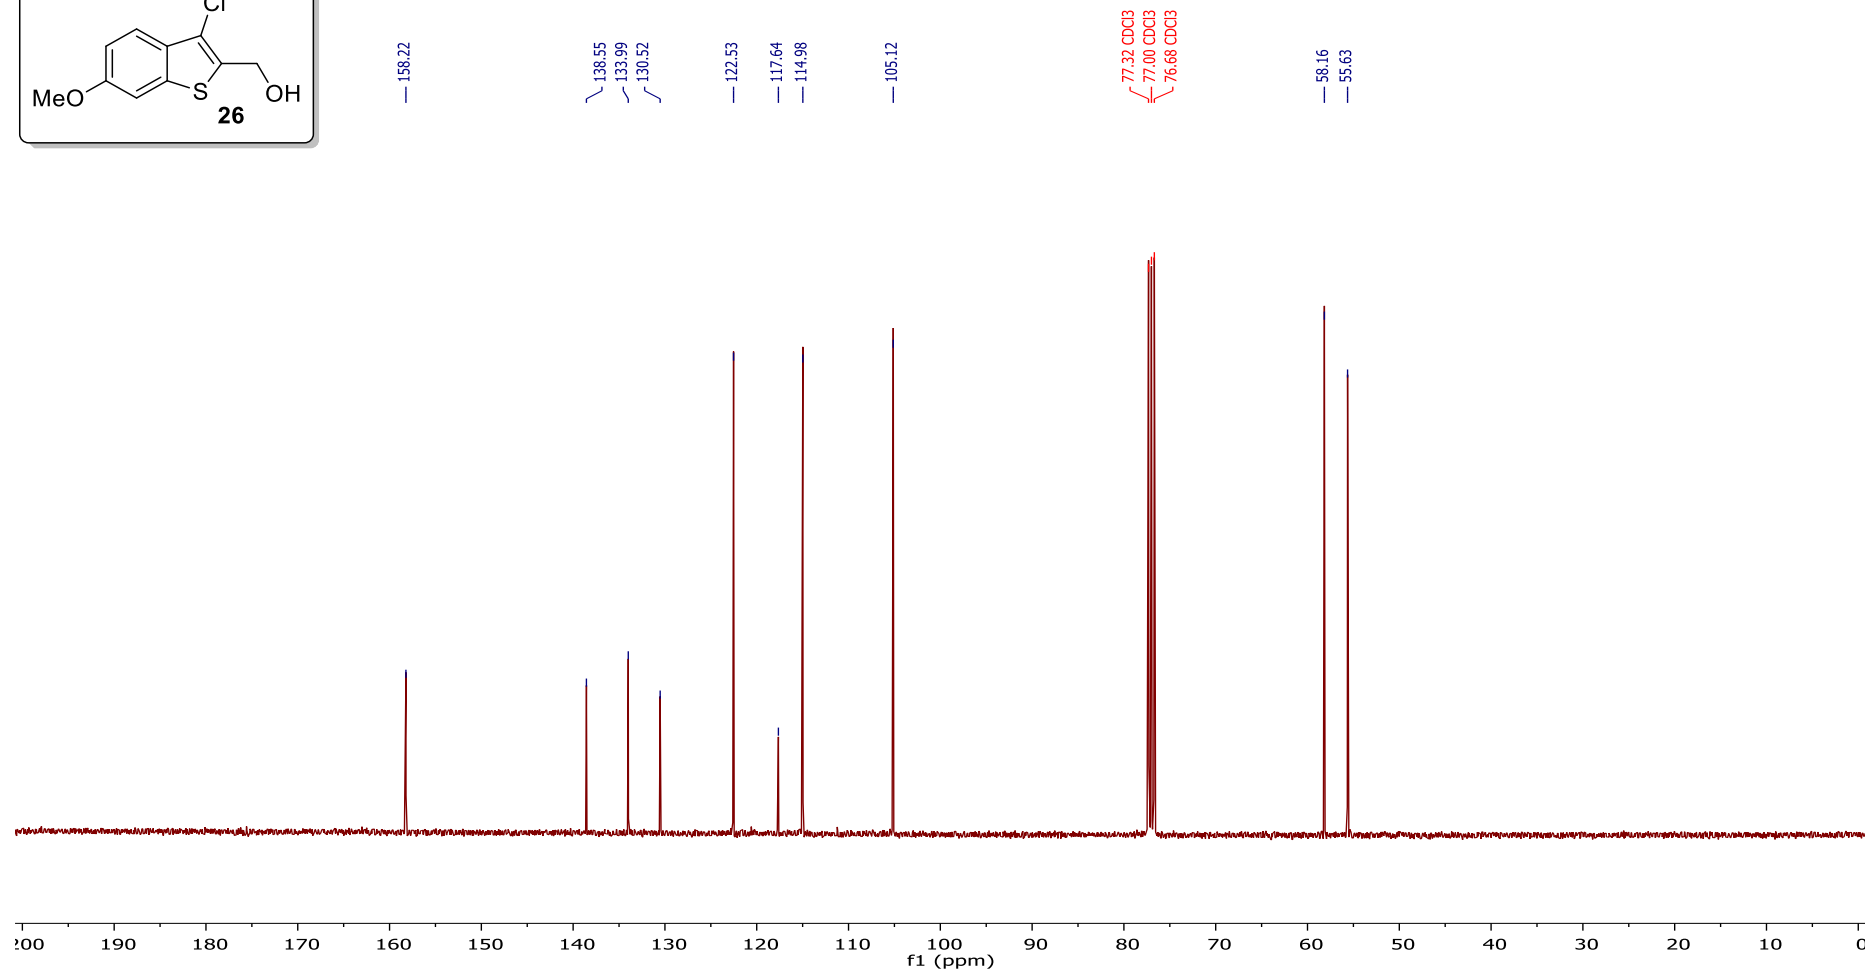

$^1\text{H}$  NMR (400 MHz,  $\text{CDCl}_3$ ):

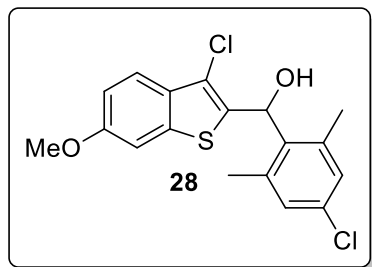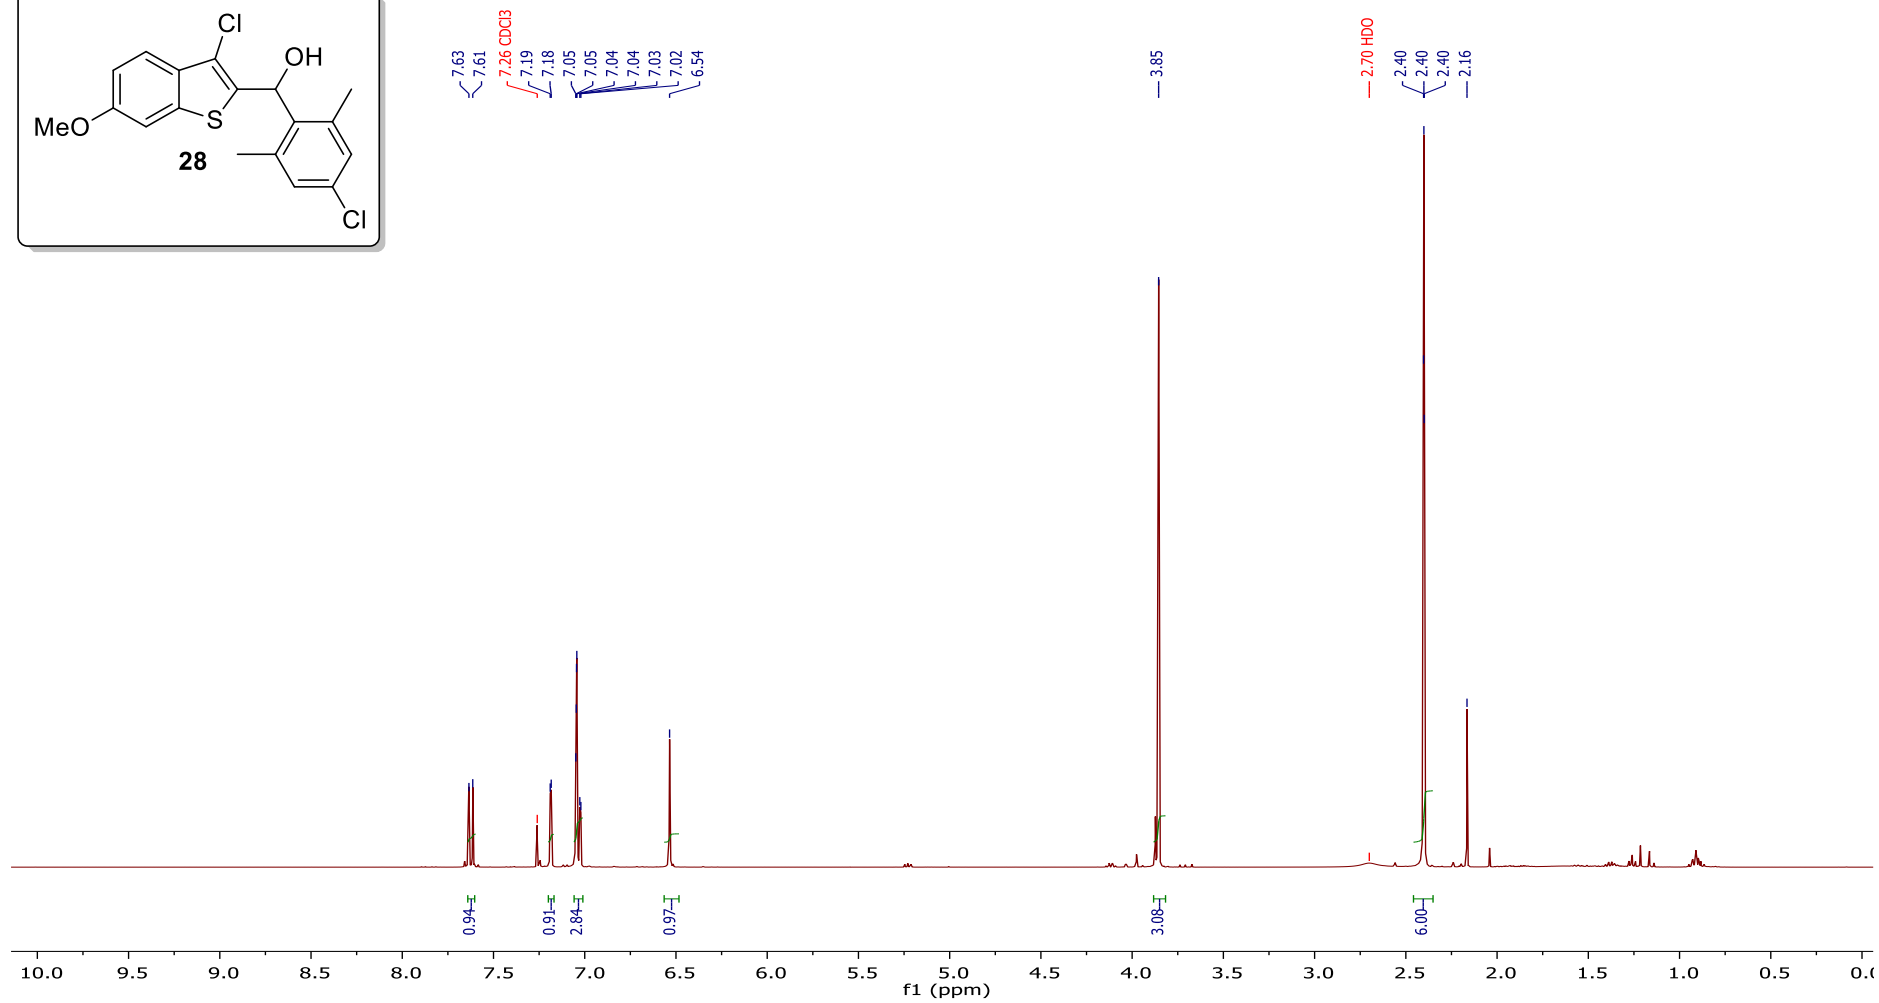

$^{13}\text{C}$  NMR (100.6 MHz,  $\text{CDCl}_3$ ):

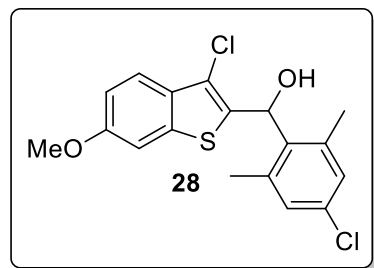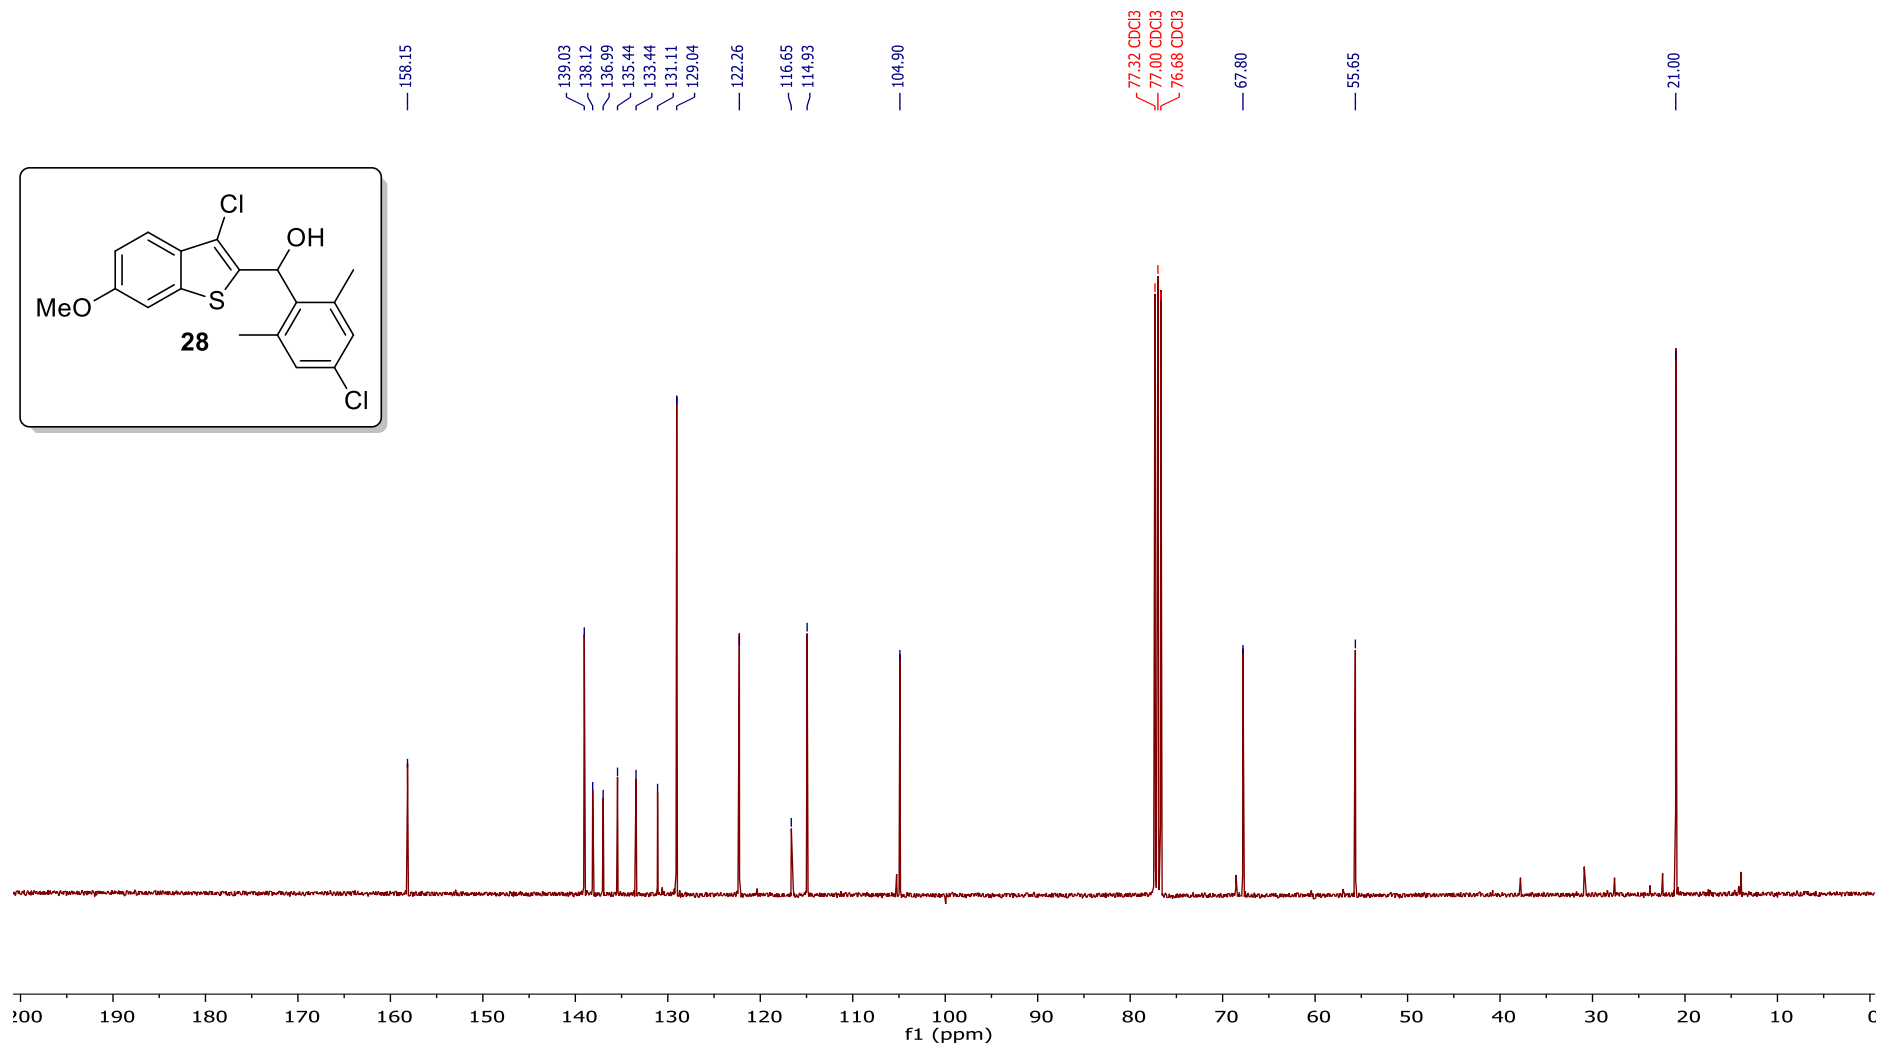

Supplement: d3nj01739g1.pdf [file d3nj01739g1.pdf]
